# Supplementary material
Source: PubMed Central journal article supplement (PMC2722358)
Supplement: 0902417106_ST1_PDF.pdf [file 0902417106_ST1_PDF.pdf]

Supplemental Table 1: Differentially Expressed Genes

| UCSC<br>Cluster | Biological Replicate 1 |      |                 |     |           | Biological Replicate 2 |      |           |
|-----------------|------------------------|------|-----------------|-----|-----------|------------------------|------|-----------|
|                 | Single-end data        |      | Paired-end data |     |           | Paired-end data        |      |           |
|                 | E18                    | P7   | E18             | P7  | p-value   | E18                    | P7   | p-value   |
| 2               | 41                     | 30   | 46              | 5   | 7.55E-11  | 39                     | 12   | 3.61E-06  |
| 13              | 22                     | 11   | 33              | 4   | 1.13E-07  | 45                     | 13   | 3.79E-07  |
| 16              | 6                      | 14   | 0               | 14  | 0.000176  | 6                      | 26   | 0.0037714 |
| 18              | 8                      | 28   | 0               | 55  | 1.07E-15  | 13                     | 49   | 0.0001668 |
| 21              | 52                     | 199  | 69              | 179 | 2.09E-09  | 92                     | 526  | 3.82E-55  |
| 30              | 112                    | 59   | 109             | 36  | 3.99E-12  | 122                    | 63   | 4.56E-09  |
| 35              | 26                     | 140  | 23              | 90  | 7.64E-09  | 43                     | 168  | 5.22E-13  |
| 37              | 102                    | 44   | 126             | 39  | 1.06E-14  | 161                    | 29   | 1.00E-30  |
| 39              | 127                    | 113  | 138             | 56  | 5.44E-12  | 154                    | 141  | 0.0069605 |
| 47              | 0                      | 11   | 0               | 13  | 0.0003359 | 1                      | 27   | 2.67E-06  |
| 50              | 32                     | 13   | 27              | 1   | 1.72E-08  | 28                     | 13   | 0.0024772 |
| 76              | 25                     | 11   | 62              | 12  | 4.43E-11  | 55                     | 20   | 5.18E-07  |
| 91              | 91                     | 168  | 75              | 165 | 1.45E-06  | 150                    | 368  | 9.72E-13  |
| 98              | 24                     | 48   | 16              | 56  | 2.56E-05  | 25                     | 84   | 4.35E-06  |
| 107             | 157                    | 127  | 257             | 98  | 1.10E-22  | 218                    | 202  | 0.0019448 |
| 108             | 152                    | 134  | 169             | 106 | 8.42E-07  | 295                    | 173  | 5.60E-16  |
| 112             | 17                     | 10   | 33              | 10  | 8.49E-05  | 30                     | 12   | 0.0004963 |
| 128             | 68                     | 74   | 130             | 84  | 3.61E-05  | 156                    | 109  | 2.27E-06  |
| 134             | 63                     | 228  | 64              | 307 | 1.54E-32  | 173                    | 474  | 3.52E-20  |
| 136             | 67                     | 373  | 125             | 593 | 1.10E-60  | 188                    | 882  | 1.50E-76  |
| 141             | 5                      | 4    | 0               | 28  | 4.07E-08  | 4                      | 24   | 0.0010037 |
| 149             | 135                    | 46   | 207             | 86  | 1.05E-16  | 249                    | 64   | 3.13E-37  |
| 153             | 38                     | 105  | 38              | 119 | 8.25E-09  | 78                     | 178  | 7.01E-06  |
| 156             | 99                     | 88   | 118             | 75  | 6.50E-05  | 164                    | 130  | 0.0001002 |
| 162             | 118                    | 128  | 171             | 67  | 4.59E-15  | 222                    | 199  | 0.0005809 |
| 166             | 6                      | 131  | 29              | 169 | 2.27E-21  | 43                     | 302  | 2.39E-37  |
| 183             | 110                    | 62   | 121             | 62  | 1.51E-07  | 148                    | 85   | 4.41E-09  |
| 184             | 0                      | 10   | 0               | 17  | 2.56E-05  | 2                      | 19   | 0.0013672 |
| 189             | 8                      | 92   | 6               | 132 | 1.59E-28  | 9                      | 216  | 3.88E-43  |
| 193             | 539                    | 299  | 578             | 302 | 6.76E-30  | 992                    | 521  | 5.77E-62  |
| 205             | 203                    | 120  | 158             | 95  | 5.23E-07  | 231                    | 163  | 1.46E-08  |
| 206             | 403                    | 154  | 375             | 112 | 1.46E-42  | 672                    | 194  | 1.03E-88  |
| 207             | 127                    | 43   | 140             | 39  | 6.76E-18  | 251                    | 89   | 4.55E-28  |
| 213             | 16                     | 61   | 20              | 55  | 0.0004682 | 36                     | 148  | 2.87E-12  |
| 222             | 64                     | 57   | 82              | 39  | 3.81E-06  | 169                    | 108  | 2.84E-08  |
| 223             | 52                     | 29   | 75              | 34  | 4.55E-06  | 127                    | 59   | 5.94E-11  |
| 226             | 1                      | 92   | 12              | 115 | 1.52E-19  | 23                     | 97   | 9.94E-09  |
| 246             | 124                    | 79   | 157             | 59  | 9.56E-15  | 190                    | 101  | 7.00E-13  |
| 249             | 178                    | 90   | 199             | 52  | 3.19E-26  | 244                    | 93   | 1.95E-25  |
| 269             | 53                     | 38   | 119             | 27  | 4.47E-18  | 104                    | 47   | 1.76E-09  |
| 271             | 581                    | 386  | 656             | 256 | 4.63E-54  | 880                    | 635  | 7.98E-27  |
| 284             | 354                    | 192  | 345             | 234 | 4.38E-10  | 630                    | 274  | 2.32E-53  |
| 286             | 166                    | 51   | 176             | 46  | 2.84E-23  | 208                    | 49   | 2.55E-33  |
| 294             | 59                     | 46   | 63              | 27  | 1.05E-05  | 103                    | 61   | 2.75E-06  |
| 301             | 248                    | 140  | 199             | 50  | 4.23E-27  | 263                    | 151  | 5.55E-15  |
| 302             | 44                     | 43   | 40              | 3   | 1.83E-10  | 68                     | 52   | 0.0075123 |
| 304             | 63                     | 39   | 58              | 19  | 4.45E-07  | 101                    | 71   | 0.0001589 |
| 312             | 79                     | 227  | 155             | 253 | 0.0005008 | 229                    | 535  | 5.28E-16  |
| 326             | 140                    | 86   | 230             | 65  | 3.68E-28  | 140                    | 85   | 8.54E-08  |
| 328             | 200                    | 147  | 306             | 166 | 2.18E-15  | 522                    | 236  | 2.94E-42  |
| 346             | 128                    | 70   | 244             | 98  | 2.44E-20  | 266                    | 87   | 3.09E-32  |
| 350             | 235                    | 169  | 158             | 110 | 6.37E-05  | 286                    | 214  | 9.07E-09  |
| 353             | 54                     | 138  | 56              | 127 | 1.47E-05  | 99                     | 337  | 7.49E-21  |
| 360             | 236                    | 99   | 192             | 109 | 2.69E-09  | 326                    | 153  | 1.40E-25  |
| 361             | 18                     | 18   | 32              | 4   | 2.10E-07  | 58                     | 23   | 8.67E-07  |
| 373             | 606                    | 498  | 754             | 418 | 3.50E-34  | 1048                   | 568  | 8.55E-62  |
| 377             | 1402                   | 1213 | 1712            | 784 | 8.75E-109 | 2321                   | 1984 | 1.69E-36  |
| 381             | 25                     | 14   | 32              | 7   | 6.96E-06  | 42                     | 16   | 2.63E-05  |

|     |     |     |     |     |           |      |      |           |
|-----|-----|-----|-----|-----|-----------|------|------|-----------|
| 382 | 21  | 60  | 22  | 60  | 0.0003391 | 40   | 107  | 2.78E-05  |
| 389 | 23  | 13  | 55  | 22  | 1.63E-05  | 32   | 6    | 5.73E-07  |
| 392 | 12  | 18  | 0   | 8   | 0.008835  | 13   | 48   | 0.0002479 |
| 399 | 29  | 45  | 34  | 85  | 6.82E-05  | 63   | 131  | 0.0008556 |
| 405 | 28  | 12  | 32  | 0   | 2.45E-11  | 38   | 12   | 1.01E-05  |
| 411 | 178 | 332 | 211 | 517 | 3.39E-22  | 318  | 557  | 1.82E-06  |
| 427 | 106 | 195 | 129 | 337 | 8.66E-17  | 219  | 442  | 4.79E-09  |
| 428 | 1   | 15  | 5   | 22  | 0.0033068 | 4    | 33   | 1.72E-05  |
| 440 | 51  | 22  | 49  | 19  | 2.61E-05  | 86   | 23   | 2.12E-13  |
| 446 | 47  | 440 | 81  | 882 | 2.34E-148 | 104  | 766  | 3.85E-95  |
| 454 | 221 | 373 | 318 | 517 | 7.94E-07  | 544  | 855  | 4.24E-05  |
| 457 | 98  | 225 | 157 | 303 | 6.68E-08  | 191  | 413  | 2.27E-10  |
| 461 | 9   | 315 | 31  | 436 | 2.94E-81  | 39   | 879  | 5.98E-169 |
| 464 | 29  | 370 | 49  | 649 | 1.15E-117 | 93   | 856  | 2.76E-120 |
| 465 | 21  | 67  | 21  | 75  | 9.11E-07  | 19   | 70   | 8.58E-06  |
| 466 | 83  | 120 | 177 | 146 | 0.0036659 | 222  | 196  | 0.0003191 |
| 469 | 45  | 186 | 47  | 242 | 1.68E-27  | 112  | 335  | 4.66E-17  |
| 472 | 7   | 39  | 16  | 52  | 0.0001278 | 20   | 77   | 1.64E-06  |
| 473 | 90  | 229 | 174 | 473 | 1.01E-24  | 267  | 542  | 6.19E-11  |
| 474 | 82  | 133 | 106 | 302 | 1.69E-17  | 191  | 318  | 0.0020593 |
| 478 | 107 | 232 | 118 | 511 | 2.45E-48  | 247  | 503  | 2.20E-10  |
| 489 | 83  | 255 | 137 | 231 | 0.0003037 | 180  | 531  | 1.11E-25  |
| 493 | 63  | 302 | 47  | 331 | 6.82E-46  | 101  | 545  | 1.67E-54  |
| 514 | 246 | 229 | 348 | 161 | 4.76E-23  | 493  | 370  | 4.67E-14  |
| 533 | 131 | 431 | 301 | 798 | 6.65E-39  | 377  | 1337 | 5.55E-83  |
| 542 | 487 | 399 | 651 | 335 | 1.59E-34  | 627  | 551  | 9.64E-10  |
| 548 | 65  | 77  | 145 | 118 | 0.0064343 | 213  | 142  | 3.26E-09  |
| 560 | 0   | 12  | 0   | 26  | 1.56E-07  | 4    | 35   | 6.11E-06  |
| 561 | 75  | 22  | 61  | 13  | 2.57E-10  | 60   | 31   | 4.73E-05  |
| 564 | 86  | 391 | 178 | 718 | 1.64E-62  | 180  | 1035 | 1.91E-107 |
| 574 | 127 | 68  | 168 | 79  | 1.63E-11  | 277  | 138  | 3.93E-20  |
| 575 | 9   | 5   | 19  | 0   | 5.01E-07  | 11   | 1    | 0.0009227 |
| 580 | 216 | 196 | 323 | 264 | 4.85E-05  | 535  | 397  | 1.34E-15  |
| 590 | 55  | 12  | 49  | 26  | 0.0015942 | 56   | 31   | 0.0002075 |
| 598 | 5   | 72  | 5   | 53  | 7.92E-10  | 20   | 189  | 4.24E-28  |
| 604 | 108 | 83  | 133 | 77  | 1.47E-06  | 179  | 153  | 0.0004865 |
| 611 | 171 | 71  | 298 | 199 | 2.46E-09  | 387  | 107  | 1.15E-53  |
| 662 | 96  | 212 | 153 | 262 | 6.51E-05  | 47   | 161  | 1.05E-10  |
| 672 | 145 | 111 | 92  | 30  | 1.22E-10  | 168  | 150  | 0.002719  |
| 684 | 0   | 10  | 0   | 13  | 0.0003359 | 0    | 30   | 4.16E-08  |
| 688 | 111 | 48  | 125 | 20  | 3.33E-23  | 154  | 66   | 2.22E-14  |
| 694 | 123 | 47  | 120 | 19  | 1.67E-22  | 145  | 34   | 9.21E-24  |
| 704 | 11  | 52  | 12  | 51  | 6.41E-06  | 17   | 67   | 4.72E-06  |
| 712 | 86  | 39  | 70  | 49  | 0.0097917 | 102  | 84   | 0.0049025 |
| 734 | 590 | 470 | 747 | 455 | 3.08E-27  | 1079 | 719  | 1.49E-40  |
| 736 | 254 | 194 | 350 | 270 | 1.03E-06  | 484  | 319  | 1.29E-19  |
| 748 | 23  | 12  | 30  | 12  | 0.001649  | 49   | 32   | 0.0048539 |
| 753 | 0   | 14  | 7   | 55  | 4.20E-09  | 6    | 50   | 9.19E-08  |
| 762 | 33  | 166 | 42  | 140 | 7.36E-11  | 87   | 306  | 5.73E-20  |
| 772 | 14  | 49  | 24  | 75  | 6.63E-06  | 19   | 141  | 1.23E-18  |
| 773 | 95  | 33  | 117 | 29  | 1.12E-16  | 86   | 20   | 1.20E-14  |
| 777 | 19  | 73  | 35  | 77  | 0.001193  | 58   | 166  | 1.63E-08  |
| 780 | 97  | 69  | 170 | 88  | 5.99E-10  | 171  | 81   | 6.68E-14  |
| 787 | 61  | 22  | 64  | 10  | 1.56E-12  | 107  | 45   | 1.24E-10  |
| 788 | 113 | 117 | 90  | 63  | 0.0026459 | 140  | 126  | 0.0065986 |
| 789 | 46  | 15  | 24  | 7   | 0.0008516 | 56   | 19   | 1.35E-07  |
| 805 | 112 | 70  | 164 | 122 | 0.0002897 | 228  | 147  | 1.63E-10  |
| 806 | 39  | 25  | 47  | 29  | 0.0081198 | 76   | 26   | 7.46E-10  |
| 818 | 24  | 85  | 59  | 125 | 8.08E-05  | 79   | 209  | 4.42E-09  |
| 820 | 138 | 153 | 203 | 72  | 7.46E-20  | 182  | 167  | 0.0035742 |
| 821 | 2   | 1   | 14  | 0   | 2.28E-05  | 14   | 1    | 9.91E-05  |
| 823 | 6   | 69  | 5   | 80  | 2.25E-16  | 14   | 105  | 2.69E-14  |
| 824 | 2   | 25  | 7   | 65  | 1.88E-11  | 7    | 53   | 6.81E-08  |
| 826 | 20  | 65  | 25  | 55  | 0.0068175 | 35   | 120  | 2.32E-08  |
| 827 | 10  | 4   | 16  | 4   | 0.0029925 | 23   | 7    | 0.0003777 |
| 829 | 174 | 334 | 203 | 612 | 3.28E-37  | 402  | 733  | 1.20E-09  |

|      |      |      |      |      |           |      |      |           |
|------|------|------|------|------|-----------|------|------|-----------|
| 833  | 840  | 143  | 1404 | 238  | 2.85E-237 | 1751 | 227  | 0         |
| 836  | 145  | 316  | 318  | 630  | 3.67E-16  | 421  | 635  | 0.0035875 |
| 837  | 110  | 58   | 90   | 37   | 5.27E-08  | 99   | 49   | 4.52E-08  |
| 846  | 8    | 11   | 6    | 30   | 0.0003043 | 19   | 50   | 0.005081  |
| 855  | 1    | 44   | 0    | 46   | 3.23E-13  | 3    | 80   | 5.12E-17  |
| 856  | 38   | 16   | 72   | 36   | 2.89E-05  | 71   | 47   | 0.0005761 |
| 860  | 100  | 483  | 178  | 862  | 5.12E-89  | 197  | 782  | 7.58E-57  |
| 862  | 68   | 244  | 100  | 392  | 1.00E-33  | 174  | 441  | 3.67E-16  |
| 870  | 238  | 124  | 384  | 216  | 1.20E-17  | 532  | 211  | 5.62E-51  |
| 879  | 0    | 116  | 0    | 210  | 6.64E-58  | 5    | 313  | 1.35E-71  |
| 884  | 72   | 164  | 88   | 247  | 2.75E-14  | 144  | 384  | 8.14E-16  |
| 885  | 285  | 268  | 377  | 270  | 2.95E-09  | 534  | 469  | 1.70E-08  |
| 886  | 218  | 444  | 199  | 340  | 6.69E-06  | 349  | 578  | 4.07E-05  |
| 889  | 10   | 44   | 13   | 98   | 6.35E-15  | 55   | 175  | 1.62E-10  |
| 898  | 115  | 200  | 194  | 343  | 1.16E-06  | 264  | 439  | 0.0003052 |
| 907  | 9    | 6    | 8    | 0    | 0.0022242 | 18   | 4    | 0.0004107 |
| 927  | 34   | 5    | 57   | 10   | 9.63E-11  | 29   | 3    | 5.95E-08  |
| 935  | 26   | 19   | 44   | 14   | 8.13E-06  | 62   | 17   | 8.44E-10  |
| 938  | 365  | 279  | 501  | 156  | 3.59E-54  | 483  | 330  | 7.44E-18  |
| 956  | 665  | 424  | 808  | 215  | 5.81E-100 | 1288 | 657  | 4.76E-84  |
| 958  | 48   | 48   | 84   | 45   | 2.81E-05  | 107  | 74   | 6.79E-05  |
| 959  | 191  | 114  | 143  | 50   | 1.31E-14  | 324  | 182  | 6.34E-19  |
| 961  | 86   | 68   | 58   | 24   | 1.17E-05  | 126  | 86   | 1.16E-05  |
| 965  | 32   | 57   | 20   | 66   | 1.09E-05  | 43   | 125  | 7.40E-07  |
| 977  | 252  | 153  | 183  | 106  | 1.58E-08  | 431  | 168  | 1.95E-42  |
| 980  | 14   | 4    | 29   | 6    | 2.12E-05  | 34   | 13   | 0.0001682 |
| 986  | 114  | 522  | 57   | 467  | 1.68E-69  | 389  | 1526 | 8.55E-108 |
| 992  | 168  | 59   | 267  | 93   | 3.52E-26  | 352  | 142  | 1.34E-33  |
| 994  | 138  | 114  | 238  | 94   | 2.95E-20  | 246  | 184  | 1.04E-07  |
| 996  | 556  | 315  | 627  | 193  | 4.68E-68  | 835  | 420  | 1.78E-56  |
| 1012 | 1    | 6    | 4    | 20   | 0.0033997 | 1    | 17   | 0.0005212 |
| 1014 | 152  | 94   | 156  | 88   | 7.53E-08  | 279  | 143  | 3.12E-19  |
| 1015 | 64   | 37   | 88   | 40   | 4.92E-07  | 83   | 32   | 2.29E-09  |
| 1022 | 100  | 167  | 161  | 248  | 0.0034222 | 240  | 418  | 5.14E-05  |
| 1024 | 15   | 10   | 24   | 0    | 1.10E-08  | 30   | 11   | 0.0002261 |
| 1027 | 54   | 46   | 37   | 9    | 4.06E-06  | 53   | 34   | 0.0023339 |
| 1033 | 145  | 138  | 97   | 31   | 2.70E-11  | 129  | 108  | 0.0020585 |
| 1034 | 280  | 258  | 256  | 101  | 8.71E-22  | 385  | 371  | 0.0002851 |
| 1038 | 190  | 102  | 140  | 55   | 1.21E-12  | 194  | 99   | 5.31E-14  |
| 1044 | 115  | 240  | 136  | 301  | 5.04E-11  | 228  | 491  | 6.46E-12  |
| 1058 | 0    | 15   | 0    | 34   | 7.57E-10  | 1    | 63   | 3.38E-15  |
| 1082 | 138  | 1163 | 205  | 1282 | 2.68E-160 | 406  | 3375 | 0         |
| 1097 | 11   | 37   | 17   | 81   | 1.54E-09  | 32   | 115  | 1.53E-08  |
| 1103 | 112  | 99   | 147  | 70   | 5.11E-10  | 224  | 144  | 2.14E-10  |
| 1104 | 81   | 42   | 82   | 50   | 0.0004407 | 129  | 43   | 3.47E-16  |
| 1107 | 95   | 58   | 123  | 63   | 8.99E-08  | 204  | 155  | 2.07E-06  |
| 1112 | 96   | 267  | 32   | 223  | 4.75E-31  | 90   | 257  | 1.78E-12  |
| 1114 | 76   | 60   | 107  | 43   | 1.11E-09  | 126  | 76   | 2.71E-07  |
| 1116 | 1535 | 985  | 2046 | 1101 | 8.49E-96  | 1800 | 1221 | 1.87E-63  |
| 1118 | 8    | 8    | 23   | 4    | 5.20E-05  | 32   | 9    | 1.29E-05  |
| 1120 | 103  | 438  | 118  | 407  | 2.75E-30  | 257  | 1102 | 9.93E-87  |
| 1126 | 42   | 92   | 36   | 111  | 4.69E-08  | 104  | 181  | 0.0085967 |
| 1132 | 28   | 12   | 19   | 4    | 0.0005475 | 31   | 17   | 0.0054668 |
| 1143 | 5    | 97   | 0    | 133  | 7.52E-37  | 18   | 248  | 2.18E-42  |
| 1148 | 149  | 302  | 191  | 368  | 3.17E-09  | 287  | 484  | 7.58E-05  |
| 1150 | 132  | 117  | 238  | 194  | 0.0004231 | 244  | 224  | 0.0007905 |
| 1151 | 40   | 21   | 43   | 12   | 2.21E-06  | 64   | 38   | 0.0002034 |
| 1152 | 78   | 72   | 155  | 55   | 1.86E-15  | 147  | 115  | 0.0001409 |
| 1173 | 6    | 1    | 25   | 0    | 5.13E-09  | 31   | 3    | 1.46E-08  |
| 1178 | 652  | 1004 | 874  | 1459 | 5.32E-19  | 1462 | 2243 | 2.32E-09  |
| 1180 | 199  | 444  | 310  | 717  | 9.89E-27  | 468  | 918  | 1.48E-15  |
| 1181 | 176  | 1318 | 247  | 1533 | 3.00E-190 | 286  | 2179 | 4.61E-273 |
| 1182 | 8    | 60   | 20   | 137  | 1.63E-19  | 13   | 216  | 2.10E-39  |
| 1183 | 26   | 112  | 32   | 114  | 1.04E-09  | 50   | 289  | 3.66E-31  |
| 1186 | 150  | 48   | 239  | 76   | 5.46E-26  | 219  | 43   | 3.54E-39  |
| 1203 | 81   | 306  | 141  | 509  | 1.58E-39  | 243  | 674  | 9.26E-29  |

|      |      |      |      |      |           |      |      |           |
|------|------|------|------|------|-----------|------|------|-----------|
| 1204 | 267  | 831  | 510  | 1314 | 1.04E-59  | 694  | 1499 | 7.83E-34  |
| 1234 | 8    | 61   | 22   | 98   | 1.49E-10  | 18   | 125  | 3.81E-16  |
| 1235 | 35   | 93   | 43   | 106  | 1.14E-05  | 69   | 230  | 2.44E-14  |
| 1239 | 4    | 21   | 10   | 44   | 2.66E-05  | 14   | 58   | 1.33E-05  |
| 1247 | 641  | 308  | 725  | 151  | 1.35E-108 | 899  | 333  | 4.12E-92  |
| 1249 | 212  | 210  | 278  | 187  | 1.55E-08  | 361  | 357  | 0.0013966 |
| 1250 | 277  | 231  | 243  | 98   | 3.68E-20  | 296  | 213  | 4.40E-10  |
| 1261 | 595  | 528  | 722  | 242  | 1.90E-71  | 992  | 788  | 5.83E-22  |
| 1262 | 170  | 105  | 247  | 146  | 1.31E-10  | 265  | 179  | 1.11E-10  |
| 1265 | 12   | 6    | 28   | 2    | 7.51E-08  | 20   | 8    | 0.0065822 |
| 1266 | 68   | 45   | 105  | 30   | 2.39E-13  | 160  | 63   | 1.79E-16  |
| 1280 | 16   | 75   | 20   | 149  | 5.26E-22  | 37   | 176  | 1.11E-16  |
| 1281 | 176  | 132  | 209  | 180  | 0.0051485 | 396  | 264  | 7.75E-16  |
| 1300 | 22   | 19   | 59   | 16   | 1.81E-08  | 87   | 48   | 3.32E-06  |
| 1302 | 69   | 101  | 19   | 48   | 0.0030352 | 50   | 107  | 0.0016634 |
| 1305 | 105  | 90   | 135  | 78   | 1.23E-06  | 207  | 171  | 5.11E-05  |
| 1306 | 79   | 29   | 100  | 42   | 1.53E-08  | 133  | 66   | 1.81E-10  |
| 1317 | 4    | 49   | 25   | 59   | 0.002051  | 25   | 86   | 2.09E-06  |
| 1341 | 67   | 11   | 103  | 9    | 2.61E-24  | 103  | 28   | 1.43E-15  |
| 1342 | 4    | 14   | 4    | 26   | 0.0001648 | 6    | 33   | 0.0001623 |
| 1343 | 59   | 154  | 88   | 165  | 0.00015   | 130  | 285  | 8.03E-08  |
| 1350 | 176  | 70   | 160  | 74   | 2.78E-11  | 456  | 55   | 3.03E-101 |
| 1359 | 66   | 29   | 68   | 36   | 0.0001599 | 112  | 51   | 3.83E-10  |
| 1373 | 5    | 41   | 15   | 45   | 0.0006915 | 10   | 81   | 8.05E-12  |
| 1379 | 53   | 37   | 84   | 43   | 1.07E-05  | 93   | 54   | 4.14E-06  |
| 1384 | 2    | 17   | 0    | 16   | 4.86E-05  | 3    | 49   | 1.03E-09  |
| 1389 | 631  | 240  | 612  | 313  | 6.22E-33  | 788  | 345  | 9.45E-66  |
| 1400 | 11   | 5    | 31   | 2    | 9.37E-09  | 28   | 5    | 3.33E-06  |
| 1401 | 0    | 23   | 0    | 20   | 3.79E-06  | 2    | 67   | 6.79E-15  |
| 1403 | 8    | 52   | 7    | 56   | 2.45E-09  | 6    | 210  | 4.59E-45  |
| 1404 | 30   | 88   | 26   | 75   | 2.19E-05  | 29   | 96   | 1.28E-06  |
| 1419 | 25   | 14   | 35   | 4    | 3.25E-08  | 42   | 25   | 0.0029526 |
| 1422 | 120  | 107  | 157  | 110  | 8.02E-05  | 238  | 172  | 2.85E-08  |
| 1427 | 118  | 90   | 134  | 102  | 0.0020998 | 196  | 165  | 0.0001619 |
| 1430 | 15   | 39   | 15   | 57   | 8.04E-06  | 35   | 112  | 2.92E-07  |
| 1431 | 15   | 122  | 6    | 62   | 2.15E-11  | 44   | 188  | 4.97E-16  |
| 1442 | 27   | 19   | 28   | 10   | 0.0009309 | 29   | 13   | 0.0016045 |
| 1448 | 56   | 37   | 80   | 4    | 4.99E-22  | 58   | 28   | 1.78E-05  |
| 1452 | 16   | 73   | 20   | 50   | 0.002559  | 36   | 126  | 6.90E-09  |
| 1455 | 83   | 131  | 73   | 128  | 0.003666  | 111  | 263  | 8.10E-09  |
| 1457 | 223  | 549  | 310  | 483  | 2.21E-05  | 360  | 721  | 1.64E-13  |
| 1466 | 201  | 94   | 277  | 90   | 2.16E-29  | 384  | 176  | 7.54E-31  |
| 1469 | 150  | 53   | 113  | 3    | 1.33E-33  | 86   | 27   | 7.47E-12  |
| 1470 | 67   | 60   | 79   | 56   | 0.0057262 | 110  | 62   | 2.93E-07  |
| 1496 | 0    | 17   | 3    | 32   | 1.66E-06  | 2    | 15   | 0.0063446 |
| 1501 | 328  | 248  | 357  | 113  | 1.94E-38  | 390  | 318  | 9.93E-09  |
| 1512 | 42   | 76   | 16   | 59   | 7.41E-06  | 74   | 145  | 0.0017096 |
| 1524 | 86   | 89   | 135  | 85   | 1.34E-05  | 276  | 216  | 2.03E-07  |
| 1549 | 312  | 471  | 345  | 272  | 3.99E-06  | 693  | 753  | 0.0059014 |
| 1552 | 8    | 75   | 26   | 56   | 0.0075945 | 36   | 114  | 3.67E-07  |
| 1555 | 95   | 53   | 116  | 55   | 3.32E-08  | 189  | 73   | 1.14E-19  |
| 1557 | 66   | 296  | 83   | 160  | 0.0001061 | 151  | 408  | 3.53E-17  |
| 1558 | 24   | 136  | 42   | 177  | 3.51E-17  | 74   | 298  | 5.53E-23  |
| 1568 | 452  | 289  | 688  | 338  | 1.23E-39  | 445  | 289  | 9.09E-19  |
| 1569 | 258  | 145  | 243  | 96   | 9.79E-21  | 379  | 204  | 1.19E-23  |
| 1575 | 34   | 17   | 19   | 4    | 0.0005475 | 29   | 13   | 0.0016045 |
| 1595 | 6    | 13   | 1    | 11   | 0.0077137 | 6    | 29   | 0.0009963 |
| 1597 | 261  | 490  | 277  | 434  | 4.76E-05  | 492  | 887  | 8.35E-11  |
| 1602 | 451  | 239  | 409  | 215  | 2.06E-21  | 801  | 358  | 6.86E-65  |
| 1603 | 2225 | 1764 | 2433 | 988  | 3.43E-185 | 3705 | 2639 | 6.35E-112 |
| 1612 | 62   | 43   | 76   | 44   | 0.0003197 | 195  | 86   | 2.63E-17  |
| 1613 | 268  | 189  | 292  | 131  | 1.82E-20  | 322  | 229  | 3.09E-11  |
| 1623 | 19   | 11   | 23   | 10   | 0.0085793 | 63   | 39   | 0.0004461 |
| 1628 | 246  | 520  | 252  | 401  | 4.36E-05  | 531  | 980  | 4.38E-13  |
| 1629 | 2    | 22   | 7    | 28   | 0.0018435 | 10   | 58   | 2.60E-07  |
| 1646 | 11   | 19   | 3    | 20   | 0.0011844 | 19   | 49   | 0.0069286 |

|      |      |      |      |      |           |      |      |           |
|------|------|------|------|------|-----------|------|------|-----------|
| 1658 | 1261 | 507  | 791  | 175  | 1.74E-113 | 1485 | 357  | 2.65E-224 |
| 1667 | 86   | 109  | 68   | 160  | 2.61E-07  | 136  | 229  | 0.0071369 |
| 1694 | 51   | 37   | 50   | 16   | 1.66E-06  | 83   | 33   | 5.01E-09  |
| 1700 | 42   | 318  | 42   | 162  | 1.44E-14  | 93   | 637  | 9.89E-76  |
| 1702 | 66   | 34   | 53   | 12   | 1.10E-08  | 118  | 62   | 1.16E-08  |
| 1705 | 881  | 941  | 844  | 634  | 6.31E-16  | 1441 | 949  | 2.90E-55  |
| 1721 | 66   | 135  | 102  | 197  | 1.28E-05  | 189  | 356  | 5.61E-06  |
| 1724 | 139  | 116  | 241  | 193  | 0.000206  | 223  | 163  | 1.47E-07  |
| 1727 | 76   | 265  | 111  | 393  | 3.60E-30  | 88   | 231  | 8.35E-10  |
| 1729 | 499  | 1213 | 844  | 2144 | 1.30E-93  | 1167 | 2924 | 8.36E-96  |
| 1733 | 44   | 20   | 48   | 27   | 0.0035197 | 61   | 45   | 0.0079932 |
| 1738 | 104  | 82   | 139  | 92   | 3.97E-05  | 234  | 154  | 3.25E-10  |
| 1744 | 90   | 31   | 168  | 20   | 6.16E-35  | 115  | 42   | 3.33E-13  |
| 1745 | 25   | 9    | 77   | 52   | 0.0034421 | 32   | 11   | 8.27E-05  |
| 1747 | 47   | 28   | 93   | 40   | 6.94E-08  | 61   | 27   | 2.65E-06  |
| 1754 | 190  | 78   | 222  | 78   | 6.52E-22  | 313  | 95   | 2.00E-40  |
| 1761 | 62   | 121  | 58   | 185  | 3.65E-13  | 79   | 204  | 1.95E-08  |
| 1769 | 115  | 90   | 127  | 52   | 5.22E-11  | 189  | 85   | 2.48E-16  |
| 1806 | 310  | 179  | 349  | 88   | 4.60E-46  | 242  | 172  | 1.03E-08  |
| 1811 | 156  | 137  | 212  | 121  | 5.27E-10  | 297  | 240  | 3.42E-07  |
| 1812 | 36   | 9    | 89   | 32   | 2.34E-09  | 53   | 7    | 1.97E-12  |
| 1819 | 50   | 26   | 44   | 16   | 4.08E-05  | 78   | 32   | 2.21E-08  |
| 1854 | 156  | 106  | 132  | 96   | 0.0006864 | 209  | 136  | 1.82E-09  |
| 1858 | 6    | 145  | 18   | 106  | 6.61E-14  | 28   | 316  | 1.32E-49  |
| 1866 | 37   | 12   | 44   | 3    | 6.88E-12  | 58   | 24   | 1.82E-06  |
| 1868 | 842  | 776  | 871  | 844  | 0.0005351 | 985  | 964  | 3.77E-08  |
| 1873 | 122  | 303  | 134  | 334  | 2.43E-15  | 266  | 558  | 1.86E-12  |
| 1879 | 271  | 185  | 391  | 209  | 8.39E-20  | 593  | 330  | 5.35E-34  |
| 1886 | 499  | 1379 | 693  | 1369 | 5.48E-33  | 1073 | 2646 | 1.21E-83  |
| 1891 | 40   | 161  | 59   | 251  | 4.15E-24  | 63   | 171  | 5.07E-08  |
| 1894 | 97   | 38   | 140  | 61   | 5.77E-11  | 160  | 107  | 3.60E-07  |
| 1895 | 30   | 58   | 67   | 116  | 0.007494  | 94   | 168  | 0.0061461 |
| 1898 | 153  | 110  | 123  | 82   | 0.0001445 | 107  | 77   | 0.0001917 |
| 1964 | 308  | 213  | 447  | 260  | 7.82E-19  | 626  | 378  | 2.01E-30  |
| 1965 | 38   | 8    | 73   | 17   | 2.02E-11  | 86   | 13   | 1.50E-18  |
| 1966 | 7    | 70   | 11   | 73   | 8.42E-11  | 27   | 161  | 2.17E-18  |
| 1984 | 5    | 46   | 10   | 82   | 3.71E-13  | 7    | 102  | 2.06E-18  |
| 1985 | 4    | 79   | 16   | 101  | 5.02E-14  | 29   | 199  | 9.64E-25  |
| 1992 | 46   | 173  | 66   | 180  | 2.31E-10  | 93   | 262  | 2.17E-12  |
| 1997 | 93   | 88   | 145  | 114  | 0.002739  | 193  | 168  | 0.0005569 |
| 2012 | 45   | 103  | 76   | 142  | 0.0005127 | 86   | 214  | 3.62E-08  |
| 2015 | 66   | 186  | 130  | 299  | 8.12E-12  | 136  | 322  | 1.62E-10  |
| 2016 | 351  | 500  | 501  | 671  | 0.0083947 | 598  | 873  | 0.0049674 |
| 2018 | 46   | 165  | 63   | 288  | 2.29E-29  | 101  | 319  | 6.97E-18  |
| 2033 | 114  | 52   | 97   | 32   | 6.26E-11  | 199  | 89   | 2.45E-17  |
| 2045 | 58   | 111  | 94   | 186  | 1.12E-05  | 166  | 296  | 0.0003019 |
| 2048 | 477  | 1019 | 538  | 1258 | 7.24E-47  | 916  | 2133 | 1.02E-58  |
| 2049 | 33   | 107  | 37   | 160  | 3.80E-16  | 44   | 242  | 2.49E-25  |
| 2058 | 758  | 634  | 1478 | 1123 | 1.77E-25  | 1698 | 803  | 1.20E-124 |
| 2063 | 328  | 468  | 298  | 650  | 2.49E-21  | 642  | 1336 | 5.51E-27  |
| 2074 | 41   | 38   | 111  | 76   | 0.0005406 | 112  | 64   | 2.83E-07  |
| 2076 | 316  | 660  | 553  | 1368 | 2.61E-57  | 815  | 1723 | 3.89E-36  |
| 2077 | 292  | 493  | 377  | 646  | 3.26E-10  | 528  | 1073 | 2.33E-20  |
| 2078 | 260  | 114  | 333  | 142  | 6.09E-25  | 267  | 93   | 2.32E-30  |
| 2079 | 209  | 156  | 289  | 225  | 1.40E-05  | 499  | 324  | 6.66E-21  |
| 2085 | 164  | 78   | 195  | 74   | 1.04E-17  | 245  | 96   | 1.22E-24  |
| 2087 | 920  | 603  | 1847 | 1355 | 3.70E-36  | 2307 | 1157 | 2.23E-153 |
| 2094 | 168  | 98   | 206  | 133  | 1.96E-07  | 356  | 168  | 1.34E-27  |
| 2095 | 231  | 179  | 340  | 243  | 1.81E-08  | 427  | 384  | 2.08E-06  |
| 2097 | 97   | 52   | 126  | 77   | 1.13E-05  | 202  | 66   | 6.37E-25  |
| 2101 | 36   | 50   | 50   | 138  | 2.73E-08  | 65   | 149  | 3.34E-05  |
| 2103 | 128  | 349  | 327  | 656  | 2.70E-17  | 309  | 749  | 7.11E-24  |
| 2114 | 122  | 81   | 175  | 141  | 0.0018958 | 109  | 87   | 0.0015363 |
| 2118 | 12   | 68   | 9    | 108  | 4.09E-20  | 35   | 119  | 3.35E-08  |
| 2123 | 119  | 63   | 149  | 99   | 2.41E-05  | 231  | 130  | 8.63E-14  |
| 2124 | 4    | 9    | 3    | 17   | 0.0056849 | 5    | 30   | 0.0002415 |

|      |      |      |      |      |           |      |      |           |
|------|------|------|------|------|-----------|------|------|-----------|
| 2125 | 101  | 477  | 183  | 781  | 8.58E-72  | 240  | 1090 | 3.61E-91  |
| 2126 | 97   | 181  | 190  | 340  | 6.33E-07  | 289  | 483  | 0.0001203 |
| 2135 | 1544 | 1253 | 1486 | 1156 | 3.52E-23  | 1605 | 1031 | 3.04E-65  |
| 2142 | 55   | 348  | 78   | 589  | 1.37E-83  | 163  | 825  | 3.77E-77  |
| 2156 | 82   | 166  | 142  | 321  | 3.58E-12  | 217  | 382  | 6.43E-05  |
| 2163 | 256  | 527  | 483  | 958  | 7.93E-24  | 507  | 868  | 2.48E-08  |
| 2167 | 7    | 4    | 18   | 0    | 1.07E-06  | 17   | 5    | 0.0021662 |
| 2168 | 38   | 22   | 64   | 12   | 1.37E-11  | 146  | 74   | 5.77E-11  |
| 2186 | 194  | 92   | 259  | 105  | 3.65E-21  | 423  | 185  | 3.58E-36  |
| 2189 | 11   | 34   | 21   | 48   | 0.0076371 | 29   | 69   | 0.0031211 |
| 2191 | 79   | 27   | 103  | 20   | 2.24E-17  | 90   | 26   | 3.41E-13  |
| 2196 | 187  | 81   | 299  | 111  | 3.50E-27  | 282  | 144  | 1.21E-19  |
| 2199 | 53   | 36   | 65   | 45   | 0.0096746 | 77   | 58   | 0.0031651 |
| 2254 | 76   | 47   | 152  | 42   | 1.79E-19  | 143  | 83   | 1.28E-08  |
| 2255 | 95   | 72   | 160  | 70   | 2.64E-12  | 189  | 133  | 2.78E-07  |
| 2257 | 112  | 120  | 214  | 180  | 0.0024087 | 300  | 277  | 0.0002225 |
| 2333 | 50   | 18   | 104  | 14   | 4.84E-21  | 89   | 25   | 3.55E-13  |
| 2340 | 12   | 19   | 26   | 3    | 1.80E-06  | 36   | 17   | 0.0007449 |
| 2363 | 115  | 295  | 104  | 199  | 1.86E-05  | 152  | 456  | 7.11E-23  |
| 2366 | 402  | 748  | 450  | 709  | 1.10E-07  | 829  | 1484 | 1.39E-16  |
| 2367 | 310  | 88   | 371  | 57   | 2.24E-67  | 612  | 144  | 5.79E-95  |
| 2389 | 135  | 111  | 71   | 27   | 2.50E-07  | 110  | 60   | 1.06E-07  |
| 2391 | 115  | 120  | 132  | 94   | 0.0003954 | 164  | 144  | 0.0019086 |
| 2397 | 22   | 66   | 17   | 73   | 5.83E-08  | 41   | 111  | 1.27E-05  |
| 2407 | 167  | 391  | 129  | 204  | 0.0042336 | 289  | 533  | 1.07E-07  |
| 2412 | 44   | 21   | 21   | 5    | 0.0005473 | 31   | 8    | 1.24E-05  |
| 2413 | 2    | 95   | 0    | 65   | 2.73E-18  | 12   | 145  | 3.40E-24  |
| 2419 | 376  | 1032 | 351  | 657  | 4.40E-14  | 392  | 1275 | 8.32E-70  |
| 2420 | 30   | 21   | 55   | 21   | 8.07E-06  | 72   | 33   | 6.07E-07  |
| 2426 | 172  | 136  | 178  | 30   | 1.78E-31  | 198  | 141  | 2.33E-07  |
| 2434 | 64   | 63   | 66   | 27   | 3.13E-06  | 131  | 77   | 8.15E-08  |
| 2435 | 1    | 6    | 0    | 19   | 7.15E-06  | 2    | 19   | 0.0013672 |
| 2442 | 73   | 48   | 52   | 21   | 2.87E-05  | 92   | 75   | 0.0062418 |
| 2453 | 123  | 646  | 94   | 679  | 9.65E-94  | 278  | 1458 | 2.53E-139 |
| 2459 | 165  | 72   | 147  | 108  | 0.0004269 | 263  | 103  | 1.91E-26  |
| 2461 | 123  | 87   | 98   | 17   | 8.60E-18  | 103  | 72   | 0.0001301 |
| 2462 | 243  | 179  | 188  | 123  | 1.17E-06  | 348  | 305  | 4.65E-06  |
| 2464 | 48   | 34   | 83   | 54   | 0.0010963 | 128  | 89   | 1.52E-05  |
| 2473 | 4    | 28   | 3    | 18   | 0.0033896 | 13   | 63   | 6.92E-07  |
| 2478 | 23   | 7    | 15   | 0    | 1.06E-05  | 36   | 9    | 1.31E-06  |
| 2479 | 89   | 49   | 89   | 29   | 2.22E-10  | 147  | 122  | 0.0007173 |
| 2483 | 16   | 44   | 13   | 50   | 2.28E-05  | 49   | 107  | 0.0012031 |
| 2486 | 42   | 91   | 83   | 194  | 2.24E-08  | 97   | 228  | 9.58E-08  |
| 2489 | 118  | 83   | 111  | 59   | 1.03E-06  | 202  | 127  | 5.26E-10  |
| 2500 | 458  | 427  | 495  | 473  | 0.0050426 | 758  | 649  | 6.76E-13  |
| 2503 | 169  | 115  | 190  | 109  | 4.91E-09  | 250  | 213  | 3.02E-05  |
| 2507 | 472  | 229  | 549  | 143  | 9.43E-70  | 725  | 288  | 7.90E-69  |
| 2510 | 104  | 72   | 110  | 74   | 0.0003696 | 223  | 115  | 1.23E-15  |
| 2512 | 51   | 42   | 45   | 26   | 0.0058491 | 88   | 34   | 6.77E-10  |
| 2514 | 42   | 29   | 46   | 1    | 1.43E-14  | 75   | 28   | 6.35E-09  |
| 2520 | 161  | 211  | 261  | 200  | 2.03E-05  | 455  | 405  | 5.09E-07  |
| 2537 | 56   | 108  | 40   | 145  | 2.46E-12  | 110  | 190  | 0.0074998 |
| 2539 | 9    | 44   | 10   | 92   | 1.48E-15  | 28   | 111  | 3.13E-09  |
| 2546 | 6    | 5    | 0    | 11   | 0.0012317 | 2    | 16   | 0.0037918 |
| 2558 | 120  | 124  | 170  | 145  | 0.0093242 | 256  | 219  | 3.08E-05  |
| 2564 | 461  | 161  | 706  | 282  | 2.85E-56  | 866  | 232  | 4.27E-121 |
| 2566 | 125  | 332  | 124  | 623  | 6.24E-67  | 152  | 500  | 8.24E-29  |
| 2572 | 475  | 459  | 950  | 917  | 0.000224  | 1360 | 1056 | 4.41E-32  |
| 2575 | 381  | 1030 | 509  | 1495 | 6.58E-85  | 860  | 2122 | 1.56E-67  |
| 2576 | 294  | 416  | 408  | 639  | 6.89E-07  | 610  | 918  | 0.0005558 |
| 2585 | 205  | 313  | 302  | 453  | 0.000299  | 373  | 657  | 1.53E-07  |
| 2588 | 75   | 50   | 111  | 50   | 1.24E-08  | 150  | 73   | 6.87E-12  |
| 2591 | 6    | 21   | 3    | 22   | 0.0004064 | 8    | 33   | 0.0013697 |
| 2592 | 14   | 38   | 13   | 50   | 2.28E-05  | 29   | 75   | 0.0007232 |
| 2593 | 18   | 9    | 36   | 3    | 2.55E-09  | 27   | 8    | 0.0001109 |
| 2606 | 28   | 17   | 48   | 15   | 2.86E-06  | 51   | 17   | 4.62E-07  |

|      |      |      |      |      |           |      |      |           |
|------|------|------|------|------|-----------|------|------|-----------|
| 2609 | 979  | 1680 | 1417 | 2193 | 6.09E-19  | 1771 | 2975 | 1.44E-22  |
| 2616 | 32   | 6    | 40   | 13   | 2.40E-05  | 43   | 20   | 0.0001823 |
| 2619 | 51   | 47   | 77   | 45   | 0.0002648 | 135  | 92   | 4.90E-06  |
| 2621 | 49   | 31   | 56   | 14   | 1.20E-08  | 139  | 56   | 3.02E-14  |
| 2623 | 289  | 542  | 334  | 652  | 6.12E-16  | 824  | 1337 | 6.25E-09  |
| 2629 | 641  | 447  | 956  | 617  | 1.87E-29  | 1345 | 800  | 1.96E-65  |
| 2630 | 20   | 10   | 33   | 10   | 8.49E-05  | 14   | 3    | 0.002247  |
| 2637 | 210  | 169  | 268  | 232  | 0.0019528 | 415  | 265  | 2.63E-18  |
| 2647 | 15   | 12   | 16   | 1    | 7.06E-05  | 27   | 12   | 0.0019776 |
| 2657 | 5    | 14   | 12   | 44   | 0.0001333 | 4    | 60   | 2.07E-11  |
| 2723 | 19   | 2    | 8    | 0    | 0.0022242 | 16   | 3    | 0.0006649 |
| 2726 | 151  | 154  | 188  | 144  | 0.0002732 | 262  | 257  | 0.0053294 |
| 2727 | 55   | 36   | 78   | 37   | 5.47E-06  | 102  | 62   | 6.01E-06  |
| 2734 | 4    | 34   | 0    | 40   | 1.52E-11  | 6    | 50   | 9.19E-08  |
| 2735 | 10   | 45   | 19   | 104  | 5.09E-13  | 27   | 140  | 1.37E-14  |
| 2739 | 96   | 116  | 181  | 67   | 4.27E-17  | 270  | 207  | 7.91E-08  |
| 2740 | 137  | 101  | 249  | 116  | 9.51E-17  | 287  | 162  | 8.54E-17  |
| 2741 | 37   | 117  | 54   | 226  | 1.51E-21  | 84   | 291  | 1.05E-18  |
| 2743 | 71   | 82   | 173  | 87   | 1.32E-10  | 136  | 103  | 0.0001135 |
| 2744 | 32   | 100  | 50   | 213  | 9.92E-21  | 76   | 228  | 3.53E-12  |
| 2750 | 11   | 59   | 17   | 113  | 5.98E-16  | 33   | 227  | 4.52E-28  |
| 2751 | 2    | 26   | 5    | 32   | 3.97E-05  | 10   | 53   | 2.64E-06  |
| 2754 | 130  | 88   | 157  | 86   | 2.29E-08  | 201  | 122  | 1.14E-10  |
| 2755 | 20   | 63   | 52   | 137  | 1.08E-07  | 57   | 118  | 0.0017524 |
| 2763 | 50   | 95   | 9    | 82   | 5.08E-14  | 63   | 133  | 0.000541  |
| 2770 | 2    | 36   | 8    | 48   | 5.47E-07  | 6    | 119  | 3.89E-23  |
| 2771 | 136  | 238  | 249  | 486  | 2.85E-12  | 363  | 592  | 9.10E-05  |
| 2773 | 1    | 54   | 3    | 64   | 3.36E-14  | 0    | 80   | 8.77E-21  |
| 2776 | 22   | 107  | 45   | 221  | 2.82E-24  | 51   | 212  | 2.90E-17  |
| 2789 | 1    | 51   | 9    | 57   | 1.77E-08  | 4    | 56   | 2.02E-10  |
| 2794 | 546  | 1594 | 932  | 2734 | 2.07E-153 | 1233 | 2974 | 8.69E-89  |
| 2800 | 175  | 387  | 322  | 606  | 2.20E-13  | 389  | 946  | 5.01E-30  |
| 2803 | 137  | 36   | 112  | 16   | 4.18E-22  | 133  | 50   | 1.09E-14  |
| 2804 | 71   | 502  | 126  | 447  | 3.04E-34  | 183  | 1133 | 3.44E-124 |
| 2805 | 46   | 242  | 89   | 280  | 7.14E-19  | 32   | 353  | 6.53E-55  |
| 2809 | 129  | 129  | 224  | 171  | 6.45E-05  | 264  | 218  | 4.29E-06  |
| 2813 | 12   | 68   | 18   | 150  | 2.29E-23  | 34   | 169  | 1.12E-16  |
| 2815 | 380  | 2070 | 517  | 2548 | 7.47E-264 | 719  | 3063 | 2.77E-236 |
| 2817 | 75   | 34   | 112  | 69   | 5.07E-05  | 143  | 70   | 2.62E-11  |
| 2828 | 3    | 19   | 5    | 27   | 0.0003033 | 13   | 43   | 0.0017124 |
| 2838 | 27   | 68   | 23   | 56   | 0.0021287 | 64   | 128  | 0.0022173 |
| 2857 | 37   | 14   | 44   | 9    | 9.11E-08  | 63   | 18   | 1.42E-09  |
| 2861 | 407  | 504  | 461  | 311  | 3.09E-13  | 838  | 914  | 0.0033378 |
| 2867 | 354  | 172  | 396  | 104  | 2.17E-50  | 396  | 190  | 1.14E-29  |
| 2872 | 331  | 722  | 365  | 817  | 4.00E-28  | 558  | 1530 | 7.79E-62  |
| 2874 | 30   | 22   | 33   | 16   | 0.003956  | 53   | 30   | 0.0003723 |
| 2879 | 4    | 17   | 3    | 23   | 0.0002367 | 5    | 48   | 4.25E-08  |
| 2881 | 55   | 68   | 29   | 117  | 1.97E-11  | 73   | 183  | 2.77E-07  |
| 2882 | 376  | 270  | 515  | 239  | 4.31E-33  | 638  | 348  | 9.24E-38  |
| 2884 | 294  | 183  | 357  | 95   | 3.38E-45  | 536  | 323  | 2.29E-26  |
| 2889 | 266  | 115  | 398  | 141  | 1.39E-37  | 495  | 211  | 2.29E-43  |
| 2892 | 215  | 183  | 214  | 98   | 6.82E-15  | 351  | 237  | 9.55E-14  |
| 2897 | 560  | 284  | 790  | 453  | 3.65E-33  | 870  | 541  | 6.45E-39  |
| 2913 | 61   | 49   | 105  | 41   | 6.68E-10  | 75   | 58   | 0.006594  |
| 2918 | 35   | 81   | 22   | 82   | 1.01E-07  | 41   | 88   | 0.0044169 |
| 2920 | 702  | 1534 | 767  | 1325 | 4.80E-20  | 1192 | 2654 | 4.21E-64  |
| 2923 | 110  | 89   | 172  | 69   | 7.95E-15  | 176  | 139  | 4.18E-05  |
| 2926 | 29   | 29   | 44   | 24   | 0.0032865 | 68   | 44   | 0.0005676 |
| 2930 | 127  | 95   | 137  | 64   | 1.04E-09  | 146  | 119  | 0.0005118 |
| 2935 | 1695 | 1366 | 1855 | 1279 | 3.22E-45  | 2755 | 2097 | 8.11E-68  |
| 2946 | 140  | 124  | 195  | 162  | 0.0024755 | 289  | 158  | 5.90E-18  |
| 2947 | 165  | 125  | 191  | 99   | 5.58E-11  | 296  | 169  | 6.11E-17  |
| 2950 | 126  | 132  | 180  | 130  | 6.31E-05  | 344  | 259  | 3.85E-10  |
| 2969 | 193  | 171  | 188  | 139  | 9.85E-05  | 361  | 295  | 4.20E-08  |
| 2973 | 299  | 332  | 348  | 316  | 0.0027367 | 481  | 392  | 2.01E-10  |
| 2982 | 38   | 153  | 14   | 65   | 9.93E-08  | 66   | 440  | 7.79E-52  |

|      |      |     |      |      |           |      |      |           |
|------|------|-----|------|------|-----------|------|------|-----------|
| 2990 | 6    | 15  | 3    | 17   | 0.0056849 | 5    | 22   | 0.0063875 |
| 2993 | 89   | 70  | 75   | 36   | 9.64E-06  | 113  | 71   | 3.54E-06  |
| 2995 | 6    | 34  | 10   | 42   | 6.63E-05  | 5    | 52   | 8.46E-09  |
| 2999 | 16   | 1   | 31   | 7    | 1.22E-05  | 32   | 6    | 5.73E-07  |
| 3003 | 104  | 433 | 186  | 571  | 8.60E-36  | 222  | 819  | 3.45E-54  |
| 3008 | 283  | 600 | 359  | 637  | 1.76E-11  | 629  | 1201 | 5.59E-18  |
| 3009 | 5    | 18  | 0    | 33   | 1.46E-09  | 15   | 49   | 0.0006205 |
| 3013 | 50   | 37  | 56   | 19   | 1.13E-06  | 101  | 85   | 0.0077146 |
| 3022 | 1163 | 761 | 1097 | 767  | 3.27E-26  | 1720 | 1004 | 1.52E-86  |
| 3039 | 89   | 43  | 122  | 22   | 3.07E-21  | 119  | 54   | 9.81E-11  |
| 3058 | 313  | 152 | 340  | 103  | 2.66E-38  | 539  | 201  | 1.57E-55  |
| 3060 | 121  | 217 | 140  | 257  | 5.51E-06  | 240  | 471  | 1.07E-08  |
| 3061 | 19   | 51  | 13   | 57   | 1.58E-06  | 36   | 99   | 2.76E-05  |
| 3063 | 60   | 128 | 88   | 173  | 2.95E-05  | 160  | 325  | 4.45E-07  |
| 3065 | 276  | 552 | 314  | 737  | 2.19E-28  | 473  | 1041 | 2.95E-25  |
| 3069 | 34   | 23  | 39   | 17   | 0.0006772 | 85   | 38   | 4.61E-08  |
| 3072 | 559  | 215 | 236  | 73   | 1.69E-26  | 394  | 193  | 1.03E-28  |
| 3075 | 200  | 128 | 225  | 83   | 7.53E-21  | 331  | 188  | 5.63E-19  |
| 3079 | 75   | 35  | 106  | 17   | 7.01E-20  | 121  | 52   | 1.68E-11  |
| 3087 | 15   | 18  | 18   | 1    | 1.81E-05  | 40   | 26   | 0.0089706 |
| 3090 | 92   | 40  | 70   | 17   | 1.72E-10  | 113  | 59   | 2.07E-08  |
| 3091 | 7    | 63  | 14   | 68   | 2.49E-08  | 15   | 86   | 5.18E-10  |
| 3093 | 1113 | 491 | 1710 | 738  | 2.34E-119 | 2487 | 891  | 3.17E-261 |
| 3109 | 422  | 473 | 338  | 207  | 6.79E-13  | 581  | 570  | 2.82E-05  |
| 3112 | 186  | 389 | 146  | 254  | 4.73E-05  | 273  | 543  | 3.04E-10  |
| 3114 | 7    | 19  | 14   | 48   | 0.0001107 | 9    | 35   | 0.0012496 |
| 3118 | 361  | 238 | 361  | 175  | 4.34E-22  | 585  | 367  | 2.84E-26  |
| 3120 | 104  | 187 | 65   | 185  | 3.44E-11  | 184  | 348  | 5.37E-06  |
| 3123 | 4    | 69  | 16   | 86   | 5.46E-11  | 18   | 190  | 1.35E-29  |
| 3141 | 46   | 90  | 33   | 125  | 2.30E-11  | 84   | 196  | 1.26E-06  |
| 3143 | 90   | 71  | 72   | 28   | 3.26E-07  | 117  | 88   | 0.0003144 |
| 3150 | 8    | 28  | 15   | 66   | 1.57E-07  | 22   | 55   | 0.0056512 |
| 3152 | 31   | 135 | 71   | 180  | 3.95E-09  | 104  | 266  | 1.69E-10  |
| 3154 | 31   | 104 | 29   | 175  | 1.15E-22  | 87   | 324  | 1.42E-22  |
| 3161 | 224  | 750 | 346  | 998  | 1.15E-55  | 620  | 1731 | 2.98E-72  |
| 3163 | 152  | 68  | 99   | 18   | 1.74E-17  | 94   | 47   | 1.00E-07  |
| 3164 | 61   | 48  | 75   | 39   | 4.53E-05  | 149  | 102  | 2.19E-06  |
| 3168 | 274  | 489 | 535  | 711  | 0.0097501 | 514  | 970  | 3.61E-14  |
| 3169 | 179  | 104 | 317  | 123  | 3.53E-27  | 309  | 169  | 4.88E-19  |
| 3170 | 139  | 145 | 204  | 122  | 8.24E-09  | 284  | 196  | 7.06E-11  |
| 3177 | 125  | 109 | 214  | 169  | 0.0003252 | 267  | 165  | 3.22E-13  |
| 3216 | 567  | 816 | 849  | 1439 | 5.04E-20  | 1489 | 2136 | 8.50E-05  |
| 3220 | 95   | 69  | 122  | 60   | 3.84E-08  | 151  | 113  | 3.04E-05  |
| 3228 | 61   | 188 | 92   | 210  | 1.23E-08  | 131  | 242  | 0.0003805 |
| 3236 | 325  | 635 | 528  | 912  | 2.85E-14  | 821  | 1430 | 4.49E-14  |
| 3238 | 35   | 36  | 72   | 38   | 7.79E-05  | 79   | 45   | 1.74E-05  |
| 3240 | 93   | 81  | 144  | 83   | 4.77E-07  | 186  | 159  | 0.0004122 |
| 3248 | 34   | 24  | 72   | 31   | 2.35E-06  | 101  | 73   | 0.0003138 |
| 3259 | 144  | 245 | 231  | 370  | 5.96E-05  | 350  | 679  | 1.98E-11  |
| 3266 | 39   | 20  | 62   | 30   | 8.90E-05  | 89   | 49   | 2.76E-06  |
| 3267 | 153  | 87  | 267  | 169  | 1.12E-09  | 344  | 220  | 2.49E-15  |
| 3270 | 10   | 7   | 19   | 0    | 5.01E-07  | 32   | 11   | 8.27E-05  |
| 3276 | 106  | 52  | 124  | 61   | 3.23E-08  | 209  | 80   | 7.06E-22  |
| 3286 | 84   | 238 | 145  | 410  | 4.72E-23  | 266  | 711  | 3.92E-28  |
| 3287 | 42   | 8   | 86   | 19   | 1.61E-13  | 90   | 16   | 6.20E-18  |
| 3288 | 181  | 115 | 369  | 198  | 1.20E-18  | 546  | 240  | 8.28E-46  |
| 3295 | 324  | 373 | 374  | 225  | 8.37E-15  | 576  | 503  | 2.53E-09  |
| 3299 | 5    | 14  | 0    | 24   | 3.00E-07  | 3    | 26   | 0.0001145 |
| 3303 | 210  | 107 | 262  | 119  | 2.91E-18  | 296  | 143  | 2.16E-22  |
| 3305 | 25   | 61  | 27   | 151  | 1.11E-18  | 54   | 119  | 0.0005376 |
| 3306 | 59   | 43  | 59   | 17   | 4.70E-08  | 73   | 38   | 8.19E-06  |
| 3310 | 49   | 38  | 56   | 37   | 0.0092197 | 90   | 61   | 0.0002056 |
| 3326 | 30   | 168 | 24   | 217  | 8.71E-35  | 72   | 424  | 9.38E-46  |
| 3329 | 139  | 333 | 94   | 274  | 1.25E-16  | 258  | 654  | 2.49E-23  |
| 3333 | 37   | 118 | 38   | 157  | 3.30E-15  | 88   | 184  | 6.77E-05  |
| 3347 | 2    | 6   | 0    | 23   | 5.65E-07  | 0    | 12   | 0.0018112 |



|      |      |      |      |      |           |      |      |           |
|------|------|------|------|------|-----------|------|------|-----------|
| 3360 | 66   | 135  | 73   | 205  | 3.80E-12  | 159  | 261  | 0.007948  |
| 3364 | 16   | 35   | 19   | 81   | 1.46E-08  | 34   | 99   | 1.02E-05  |
| 3369 | 23   | 6    | 28   | 7    | 6.44E-05  | 41   | 12   | 1.21E-06  |
| 3372 | 633  | 2385 | 1067 | 3928 | 4.58E-301 | 1596 | 6299 | 0         |
| 3379 | 58   | 27   | 43   | 17   | 0.00013   | 57   | 20   | 1.99E-07  |
| 3382 | 216  | 238  | 293  | 161  | 1.94E-14  | 475  | 480  | 0.0007886 |
| 3384 | 313  | 326  | 475  | 430  | 0.0004085 | 314  | 301  | 0.0008613 |
| 3388 | 228  | 105  | 392  | 192  | 2.05E-23  | 334  | 92   | 9.18E-47  |
| 3392 | 84   | 36   | 94   | 32   | 2.46E-10  | 127  | 41   | 2.37E-16  |
| 3393 | 135  | 633  | 159  | 1053 | 5.25E-137 | 354  | 1936 | 2.69E-191 |
| 3396 | 178  | 120  | 252  | 207  | 0.0004379 | 269  | 245  | 0.0002679 |
| 3403 | 95   | 84   | 168  | 101  | 2.28E-07  | 284  | 193  | 3.13E-11  |
| 3405 | 58   | 150  | 100  | 229  | 2.49E-09  | 117  | 263  | 8.75E-08  |
| 3418 | 12   | 1    | 27   | 1    | 1.72E-08  | 22   | 3    | 7.84E-06  |
| 3420 | 41   | 34   | 62   | 35   | 0.0007172 | 55   | 33   | 0.0007854 |
| 3429 | 56   | 34   | 86   | 61   | 0.0047738 | 144  | 103  | 1.19E-05  |
| 3431 | 142  | 300  | 178  | 394  | 5.53E-14  | 106  | 354  | 2.35E-21  |
| 3436 | 7    | 35   | 2    | 88   | 1.07E-21  | 18   | 135  | 4.34E-18  |
| 3454 | 16   | 61   | 15   | 88   | 7.02E-12  | 48   | 98   | 0.005818  |
| 3455 | 49   | 106  | 61   | 161  | 7.12E-09  | 65   | 139  | 0.0003107 |
| 3464 | 86   | 274  | 98   | 437  | 1.44E-42  | 166  | 706  | 1.08E-55  |
| 3471 | 87   | 74   | 95   | 22   | 2.01E-14  | 140  | 98   | 8.07E-06  |
| 3476 | 34   | 32   | 60   | 13   | 4.52E-10  | 75   | 45   | 6.87E-05  |
| 3477 | 779  | 572  | 1187 | 722  | 2.13E-42  | 1397 | 837  | 7.33E-67  |
| 3483 | 35   | 7    | 30   | 7    | 2.14E-05  | 49   | 15   | 1.99E-07  |
| 3484 | 13   | 60   | 11   | 72   | 1.40E-10  | 35   | 170  | 1.76E-16  |
| 3488 | 6    | 4    | 22   | 0    | 5.07E-08  | 21   | 5    | 0.0002167 |
| 3489 | 1    | 23   | 0    | 40   | 1.52E-11  | 2    | 43   | 2.92E-09  |
| 3496 | 118  | 71   | 214  | 130  | 7.77E-09  | 183  | 103  | 3.31E-11  |
| 3499 | 238  | 183  | 285  | 92   | 2.64E-30  | 404  | 284  | 3.75E-14  |
| 3507 | 41   | 31   | 58   | 36   | 0.0036644 | 98   | 54   | 7.07E-07  |
| 3551 | 55   | 187  | 36   | 359  | 4.59E-59  | 157  | 541  | 2.91E-33  |
| 3560 | 114  | 174  | 133  | 234  | 6.67E-05  | 235  | 470  | 2.95E-09  |
| 3568 | 17   | 63   | 19   | 106  | 1.90E-13  | 34   | 138  | 1.64E-11  |
| 3572 | 1    | 24   | 0    | 30   | 1.07E-08  | 1    | 57   | 1.33E-13  |
| 3577 | 277  | 244  | 396  | 368  | 0.0041444 | 709  | 469  | 1.00E-27  |
| 3581 | 189  | 532  | 256  | 649  | 2.11E-29  | 383  | 1035 | 4.11E-41  |
| 3585 | 2136 | 2410 | 3055 | 2506 | 1.70E-35  | 4876 | 5541 | 3.14E-07  |
| 3586 | 25   | 122  | 51   | 153  | 3.46E-10  | 93   | 245  | 2.16E-10  |
| 3588 | 2    | 10   | 6    | 30   | 0.0003043 | 4    | 25   | 0.0006225 |
| 3589 | 1    | 27   | 0    | 44   | 1.16E-12  | 4    | 50   | 3.22E-09  |
| 3603 | 74   | 175  | 59   | 139  | 1.54E-06  | 129  | 316  | 4.39E-11  |
| 3621 | 583  | 529  | 995  | 939  | 2.00E-05  | 1373 | 1084 | 1.61E-30  |
| 3623 | 131  | 93   | 139  | 67   | 1.80E-09  | 263  | 129  | 1.37E-19  |
| 3625 | 145  | 423  | 258  | 677  | 1.40E-32  | 436  | 1033 | 1.58E-30  |
| 3629 | 179  | 108  | 239  | 212  | 0.0070854 | 344  | 176  | 1.48E-23  |
| 3631 | 9    | 46   | 0    | 41   | 7.96E-12  | 17   | 92   | 2.20E-10  |
| 3637 | 71   | 127  | 80   | 144  | 0.0012555 | 65   | 171  | 1.26E-07  |
| 3642 | 171  | 428  | 199  | 640  | 1.30E-42  | 390  | 1058 | 2.41E-42  |
| 3644 | 120  | 104  | 228  | 170  | 2.29E-05  | 218  | 189  | 0.0002142 |
| 3650 | 25   | 153  | 50   | 224  | 1.13E-22  | 71   | 348  | 2.12E-32  |
| 3665 | 512  | 221  | 649  | 107  | 2.66E-112 | 942  | 303  | 6.06E-112 |
| 3667 | 8    | 124  | 13   | 124  | 8.29E-21  | 21   | 283  | 7.34E-48  |
| 3673 | 191  | 336  | 281  | 672  | 5.36E-27  | 505  | 793  | 9.04E-05  |
| 3675 | 75   | 44   | 78   | 24   | 9.26E-10  | 118  | 83   | 4.72E-05  |
| 3676 | 93   | 67   | 104  | 15   | 2.44E-20  | 133  | 55   | 3.11E-13  |
| 3678 | 34   | 14   | 44   | 11   | 4.86E-07  | 48   | 22   | 5.41E-05  |
| 3686 | 305  | 221  | 400  | 185  | 2.66E-26  | 480  | 346  | 2.20E-15  |
| 3690 | 23   | 10   | 50   | 15   | 1.10E-06  | 67   | 30   | 1.02E-06  |
| 3692 | 35   | 86   | 30   | 153  | 9.19E-18  | 65   | 201  | 2.19E-11  |
| 3701 | 10   | 38   | 14   | 67   | 3.96E-08  | 18   | 67   | 1.45E-05  |
| 3705 | 37   | 39   | 103  | 62   | 6.06E-05  | 158  | 96   | 1.35E-08  |
| 3741 | 80   | 48   | 144  | 42   | 1.61E-17  | 117  | 73   | 2.38E-06  |
| 3745 | 15   | 41   | 25   | 75   | 1.22E-05  | 32   | 109  | 1.47E-07  |
| 3749 | 49   | 31   | 63   | 21   | 1.44E-07  | 71   | 37   | 9.82E-06  |
| 3760 | 1    | 43   | 2    | 25   | 1.83E-05  | 8    | 85   | 6.54E-14  |

|      |      |      |      |      |           |      |      |           |
|------|------|------|------|------|-----------|------|------|-----------|
| 3763 | 27   | 14   | 38   | 13   | 6.24E-05  | 36   | 16   | 0.0003841 |
| 3765 | 66   | 37   | 42   | 14   | 2.11E-05  | 94   | 40   | 2.53E-09  |
| 3774 | 106  | 55   | 63   | 28   | 1.94E-05  | 119  | 69   | 2.04E-07  |
| 3775 | 235  | 138  | 294  | 66   | 1.34E-42  | 298  | 159  | 4.00E-19  |
| 3780 | 89   | 176  | 94   | 155  | 0.0051494 | 166  | 330  | 9.65E-07  |
| 3787 | 32   | 25   | 64   | 38   | 0.0013766 | 88   | 60   | 0.0002499 |
| 3789 | 95   | 50   | 144  | 72   | 4.24E-09  | 234  | 76   | 8.84E-29  |
| 3796 | 124  | 112  | 182  | 83   | 6.08E-13  | 222  | 175  | 3.93E-06  |
| 3812 | 690  | 417  | 874  | 206  | 2.20E-119 | 1372 | 598  | 9.37E-114 |
| 3814 | 250  | 100  | 223  | 124  | 4.78E-11  | 409  | 183  | 7.24E-34  |
| 3817 | 78   | 57   | 94   | 60   | 0.0003567 | 126  | 70   | 2.14E-08  |
| 3823 | 59   | 42   | 70   | 49   | 0.0097917 | 128  | 97   | 0.0001631 |
| 3833 | 4    | 44   | 0    | 43   | 2.20E-12  | 7    | 72   | 9.80E-12  |
| 3835 | 20   | 64   | 15   | 50   | 0.0001468 | 27   | 159  | 5.60E-18  |
| 3842 | 26   | 93   | 35   | 80   | 0.0004994 | 41   | 196  | 2.27E-18  |
| 3844 | 398  | 116  | 401  | 91   | 2.65E-57  | 364  | 102  | 4.09E-50  |
| 3847 | 421  | 377  | 407  | 279  | 2.83E-11  | 679  | 596  | 1.69E-10  |
| 3850 | 652  | 387  | 644  | 224  | 3.40E-61  | 832  | 600  | 1.63E-25  |
| 3851 | 68   | 114  | 80   | 155  | 0.0001075 | 148  | 267  | 0.0003665 |
| 3853 | 77   | 205  | 178  | 445  | 4.40E-20  | 189  | 404  | 7.77E-10  |
| 3868 | 1    | 100  | 0    | 177  | 6.49E-49  | 8    | 123  | 3.04E-22  |
| 3871 | 437  | 800  | 807  | 1540 | 4.63E-33  | 1095 | 1928 | 1.77E-19  |
| 3872 | 461  | 400  | 739  | 633  | 8.01E-08  | 845  | 632  | 3.17E-23  |
| 3894 | 72   | 2    | 76   | 2    | 5.50E-23  | 83   | 1    | 2.18E-28  |
| 3916 | 32   | 9    | 36   | 5    | 4.69E-08  | 29   | 6    | 3.73E-06  |
| 3917 | 75   | 30   | 74   | 12   | 3.61E-14  | 75   | 31   | 6.49E-08  |
| 3918 | 118  | 201  | 157  | 376  | 7.29E-16  | 294  | 602  | 2.71E-12  |
| 3923 | 28   | 55   | 36   | 78   | 0.0013316 | 67   | 194  | 6.41E-10  |
| 3934 | 320  | 263  | 394  | 321  | 5.52E-06  | 553  | 495  | 4.19E-08  |
| 3935 | 410  | 458  | 589  | 563  | 0.002125  | 622  | 606  | 9.47E-06  |
| 3940 | 106  | 223  | 128  | 395  | 2.64E-25  | 216  | 449  | 5.78E-10  |
| 3941 | 323  | 654  | 494  | 1043 | 1.17E-30  | 553  | 1077 | 1.44E-17  |
| 3947 | 84   | 34   | 94   | 52   | 1.95E-05  | 155  | 87   | 7.60E-10  |
| 3960 | 33   | 26   | 73   | 32   | 2.94E-06  | 98   | 82   | 0.0068288 |
| 3961 | 91   | 57   | 123  | 64   | 1.46E-07  | 167  | 129  | 3.08E-05  |
| 3962 | 116  | 68   | 146  | 65   | 4.27E-11  | 170  | 126  | 7.80E-06  |
| 3965 | 1030 | 309  | 1471 | 540  | 6.07E-129 | 1672 | 479  | 1.63E-219 |
| 3966 | 82   | 305  | 112  | 456  | 1.12E-40  | 198  | 739  | 8.89E-50  |
| 3967 | 54   | 49   | 76   | 51   | 0.0032063 | 92   | 77   | 0.0084553 |
| 3983 | 1563 | 2285 | 2963 | 4493 | 8.43E-33  | 4186 | 6030 | 1.06E-11  |
| 3984 | 30   | 94   | 52   | 175  | 2.30E-13  | 98   | 276  | 5.57E-13  |
| 3987 | 143  | 142  | 246  | 220  | 0.0080735 | 403  | 309  | 5.50E-11  |
| 3988 | 71   | 265  | 104  | 511  | 4.70E-54  | 213  | 684  | 1.68E-37  |
| 3993 | 122  | 33   | 132  | 48   | 3.87E-13  | 236  | 54   | 2.19E-38  |
| 3994 | 120  | 244  | 197  | 378  | 2.44E-09  | 303  | 498  | 0.0002134 |
| 3997 | 251  | 107  | 283  | 74   | 1.27E-36  | 350  | 106  | 6.04E-45  |
| 3998 | 4    | 17   | 2    | 37   | 1.59E-08  | 9    | 59   | 5.57E-08  |
| 4005 | 1    | 13   | 0    | 11   | 0.0012317 | 3    | 31   | 1.37E-05  |
| 4006 | 5    | 11   | 6    | 23   | 0.0049009 | 1    | 17   | 0.0005212 |
| 4059 | 5    | 24   | 23   | 51   | 0.0072968 | 26   | 65   | 0.0029191 |
| 4063 | 323  | 292  | 392  | 163  | 3.41E-30  | 733  | 545  | 9.52E-21  |
| 4065 | 21   | 143  | 42   | 169  | 7.45E-16  | 72   | 535  | 2.41E-67  |
| 4079 | 14   | 46   | 8    | 37   | 7.11E-05  | 37   | 96   | 0.0001095 |
| 4080 | 264  | 791  | 473  | 1408 | 9.22E-82  | 836  | 2204 | 2.25E-81  |
| 4083 | 40   | 70   | 41   | 83   | 0.0028321 | 50   | 125  | 2.46E-05  |
| 4085 | 32   | 9    | 39   | 12   | 1.68E-05  | 27   | 7    | 3.93E-05  |
| 4090 | 5    | 48   | 0    | 59   | 1.47E-16  | 13   | 108  | 1.70E-15  |
| 4092 | 94   | 174  | 89   | 251  | 1.20E-14  | 191  | 312  | 0.0040658 |
| 4109 | 19   | 1    | 16   | 2    | 0.0004473 | 22   | 6    | 0.0003801 |
| 4110 | 191  | 122  | 265  | 152  | 4.09E-12  | 351  | 254  | 1.49E-11  |
| 4114 | 52   | 26   | 70   | 26   | 2.90E-07  | 109  | 75   | 5.54E-05  |
| 4115 | 66   | 49   | 68   | 39   | 0.0004566 | 94   | 78   | 0.0071134 |
| 4122 | 69   | 49   | 105  | 42   | 1.31E-09  | 129  | 107  | 0.0016118 |
| 4124 | 69   | 147  | 93   | 361  | 5.51E-31  | 156  | 475  | 2.10E-24  |
| 4130 | 33   | 88   | 39   | 142  | 4.09E-12  | 88   | 179  | 0.0001651 |
| 4140 | 69   | 144  | 79   | 222  | 5.64E-13  | 125  | 262  | 1.75E-06  |

|      |      |     |     |      |           |      |      |           |
|------|------|-----|-----|------|-----------|------|------|-----------|
| 4143 | 88   | 85  | 171 | 92   | 2.07E-09  | 112  | 61   | 8.70E-08  |
| 4149 | 122  | 264 | 182 | 477  | 2.21E-23  | 268  | 579  | 5.84E-14  |
| 4150 | 69   | 36  | 125 | 46   | 2.82E-12  | 110  | 43   | 7.40E-12  |
| 4155 | 16   | 313 | 8   | 375  | 2.85E-89  | 40   | 648  | 2.29E-114 |
| 4156 | 0    | 32  | 7   | 56   | 2.45E-09  | 2    | 33   | 1.01E-06  |
| 4158 | 4    | 16  | 12  | 41   | 0.0004638 | 11   | 40   | 0.0010077 |
| 4160 | 233  | 158 | 413 | 321  | 1.69E-07  | 425  | 324  | 1.04E-11  |
| 4161 | 46   | 73  | 54  | 108  | 0.0006792 | 71   | 133  | 0.0072563 |
| 4162 | 7    | 34  | 10  | 38   | 0.000391  | 12   | 46   | 0.0002795 |
| 4163 | 9    | 35  | 26  | 61   | 0.0017316 | 35   | 98   | 2.33E-05  |
| 4166 | 16   | 60  | 14  | 76   | 8.60E-10  | 32   | 123  | 1.03E-09  |
| 4206 | 10   | 81  | 16  | 167  | 9.76E-29  | 33   | 274  | 2.00E-37  |
| 4212 | 136  | 673 | 230 | 920  | 5.29E-79  | 304  | 1754 | 3.51E-181 |
| 4214 | 28   | 92  | 30  | 161  | 3.33E-19  | 71   | 176  | 6.65E-07  |
| 4217 | 200  | 193 | 232 | 161  | 8.43E-07  | 314  | 236  | 2.04E-09  |
| 4218 | 122  | 114 | 117 | 40   | 1.59E-12  | 224  | 202  | 0.0006319 |
| 4224 | 95   | 65  | 97  | 61   | 0.0002243 | 205  | 122  | 3.11E-11  |
| 4231 | 39   | 99  | 55  | 114  | 0.0002669 | 100  | 252  | 9.85E-10  |
| 4233 | 10   | 15  | 8   | 47   | 9.10E-07  | 20   | 53   | 0.0043579 |
| 4245 | 32   | 29  | 90  | 53   | 0.0001029 | 91   | 65   | 0.0004976 |
| 4257 | 1067 | 827 | 884 | 423  | 6.14E-53  | 1673 | 1140 | 2.36E-58  |
| 4258 | 32   | 31  | 61  | 8    | 4.53E-13  | 51   | 28   | 0.0003824 |
| 4259 | 108  | 93  | 204 | 30   | 1.70E-38  | 239  | 137  | 8.46E-14  |
| 4263 | 465  | 273 | 526 | 282  | 4.67E-26  | 485  | 350  | 1.77E-15  |
| 4274 | 17   | 48  | 16  | 73   | 2.43E-08  | 55   | 109  | 0.0058069 |
| 4290 | 22   | 79  | 29  | 136  | 6.27E-15  | 35   | 179  | 5.09E-18  |
| 4293 | 81   | 102 | 143 | 84   | 9.66E-07  | 196  | 172  | 0.0006316 |
| 4295 | 276  | 201 | 394 | 305  | 2.84E-07  | 541  | 330  | 7.39E-26  |
| 4300 | 1    | 22  | 0   | 24   | 3.00E-07  | 1    | 59   | 3.85E-14  |
| 4309 | 44   | 10  | 66  | 18   | 3.73E-09  | 72   | 23   | 5.94E-10  |
| 4311 | 1    | 19  | 0   | 11   | 0.0012317 | 0    | 40   | 7.68E-11  |
| 4318 | 28   | 12  | 38  | 8    | 7.57E-07  | 47   | 29   | 0.0025082 |
| 4351 | 3    | 11  | 1   | 17   | 0.0002314 | 14   | 48   | 0.0004794 |
| 4366 | 790  | 400 | 834 | 444  | 6.70E-41  | 1119 | 490  | 1.51E-92  |
| 4368 | 56   | 53  | 95  | 61   | 0.0003868 | 114  | 86   | 0.0003533 |
| 4376 | 20   | 22  | 68  | 41   | 0.001038  | 70   | 34   | 2.58E-06  |
| 4385 | 2    | 17  | 1   | 43   | 4.38E-11  | 5    | 24   | 0.0041608 |
| 4388 | 1084 | 407 | 802 | 157  | 4.74E-125 | 1116 | 328  | 6.07E-144 |
| 4389 | 63   | 38  | 137 | 101  | 0.0008831 | 179  | 93   | 1.09E-12  |
| 4391 | 221  | 374 | 441 | 655  | 2.51E-05  | 587  | 870  | 0.0020248 |
| 4408 | 153  | 97  | 190 | 159  | 0.0037106 | 299  | 225  | 5.44E-09  |
| 4411 | 185  | 314 | 352 | 603  | 1.43E-09  | 322  | 562  | 2.06E-06  |
| 4418 | 17   | 10  | 18  | 6    | 0.0067522 | 29   | 4    | 3.58E-07  |
| 4423 | 43   | 34  | 64  | 32   | 8.66E-05  | 69   | 51   | 0.0042474 |
| 4425 | 262  | 184 | 474 | 243  | 8.56E-26  | 905  | 525  | 5.96E-47  |
| 4434 | 378  | 253 | 447 | 291  | 3.58E-14  | 593  | 361  | 2.56E-28  |
| 4441 | 27   | 5   | 16  | 3    | 0.0009707 | 29   | 14   | 0.0030896 |
| 4451 | 259  | 684 | 331 | 892  | 1.51E-44  | 650  | 1571 | 5.48E-48  |
| 4457 | 270  | 733 | 446 | 1257 | 4.33E-67  | 533  | 1437 | 3.44E-56  |
| 4460 | 30   | 5   | 120 | 15   | 5.87E-25  | 151  | 17   | 2.09E-35  |
| 4467 | 104  | 254 | 173 | 279  | 0.0003964 | 243  | 442  | 3.08E-06  |
| 4482 | 138  | 375 | 127 | 557  | 5.08E-53  | 175  | 693  | 2.52E-50  |
| 4483 | 123  | 331 | 292 | 606  | 1.20E-17  | 329  | 716  | 2.79E-17  |
| 4490 | 50   | 10  | 50  | 25   | 0.0006815 | 43   | 12   | 4.03E-07  |
| 4509 | 511  | 818 | 876 | 1679 | 2.18E-36  | 1337 | 2094 | 2.46E-10  |
| 4518 | 26   | 6   | 62  | 13   | 1.46E-10  | 74   | 24   | 5.41E-10  |
| 4535 | 254  | 222 | 370 | 324  | 0.0004564 | 675  | 459  | 1.28E-24  |
| 4545 | 91   | 85  | 110 | 71   | 0.0001368 | 229  | 161  | 1.26E-08  |
| 4548 | 9    | 23  | 1   | 28   | 4.67E-07  | 10   | 60   | 1.03E-07  |
| 4559 | 405  | 482 | 477 | 329  | 9.81E-13  | 684  | 735  | 0.0032862 |
| 4562 | 80   | 39  | 62  | 39   | 0.0036199 | 64   | 48   | 0.0075104 |
| 4563 | 27   | 83  | 18  | 80   | 6.14E-09  | 62   | 133  | 0.0003944 |
| 4565 | 201  | 428 | 234 | 789  | 1.40E-55  | 377  | 830  | 1.89E-20  |
| 4568 | 30   | 120 | 64  | 134  | 5.95E-05  | 86   | 238  | 5.44E-11  |
| 4578 | 156  | 116 | 133 | 75   | 6.32E-07  | 166  | 94   | 2.73E-10  |
| 4579 | 23   | 203 | 38  | 193  | 6.16E-22  | 71   | 401  | 5.79E-42  |

|      |      |      |      |      |           |      |      |           |
|------|------|------|------|------|-----------|------|------|-----------|
| 4583 | 92   | 39   | 155  | 15   | 5.53E-35  | 130  | 47   | 6.38E-15  |
| 4584 | 46   | 46   | 78   | 51   | 0.001906  | 108  | 81   | 0.0004233 |
| 4592 | 78   | 81   | 119  | 62   | 2.96E-07  | 162  | 150  | 0.0073487 |
| 4605 | 353  | 333  | 371  | 338  | 0.0022874 | 673  | 674  | 3.40E-05  |
| 4617 | 136  | 101  | 120  | 57   | 1.58E-08  | 177  | 130  | 2.94E-06  |
| 4618 | 107  | 759  | 83   | 560  | 1.52E-74  | 190  | 1692 | 4.65E-232 |
| 4621 | 190  | 54   | 191  | 35   | 4.61E-32  | 320  | 110  | 1.25E-36  |
| 4625 | 196  | 118  | 254  | 47   | 5.75E-42  | 447  | 205  | 1.11E-35  |
| 4628 | 219  | 252  | 279  | 224  | 8.07E-05  | 521  | 439  | 7.29E-10  |
| 4630 | 51   | 31   | 83   | 18   | 2.54E-13  | 73   | 45   | 0.0001828 |
| 4631 | 2    | 61   | 8    | 91   | 1.30E-16  | 8    | 189  | 9.73E-38  |
| 4637 | 26   | 165  | 29   | 232  | 8.85E-35  | 65   | 400  | 1.33E-44  |
| 4638 | 239  | 203  | 302  | 230  | 3.09E-06  | 451  | 346  | 4.67E-12  |
| 4666 | 31   | 21   | 60   | 24   | 5.05E-06  | 72   | 38   | 1.18E-05  |
| 4668 | 58   | 31   | 82   | 5    | 1.24E-21  | 99   | 34   | 2.26E-12  |
| 4670 | 50   | 26   | 39   | 17   | 0.0006772 | 78   | 53   | 0.0005575 |
| 4672 | 758  | 533  | 931  | 457  | 4.09E-53  | 1575 | 816  | 1.13E-99  |
| 4673 | 654  | 436  | 663  | 261  | 5.13E-54  | 859  | 526  | 8.32E-40  |
| 4674 | 111  | 83   | 96   | 58   | 9.66E-05  | 206  | 157  | 2.31E-06  |
| 4678 | 5    | 32   | 10   | 37   | 0.0003877 | 8    | 100  | 3.22E-17  |
| 4679 | 5850 | 524  | 7331 | 510  | 0         | 7819 | 501  | 0         |
| 4689 | 732  | 622  | 834  | 513  | 2.11E-29  | 825  | 805  | 3.55E-07  |
| 4698 | 43   | 43   | 31   | 15   | 0.0048952 | 58   | 40   | 0.0041719 |
| 4704 | 0    | 5    | 0    | 8    | 0.008835  | 1    | 12   | 0.0091866 |
| 4710 | 437  | 524  | 515  | 316  | 7.55E-19  | 811  | 800  | 1.27E-06  |
| 4734 | 598  | 308  | 721  | 425  | 1.55E-28  | 1102 | 416  | 3.20E-110 |
| 4737 | 10   | 26   | 0    | 31   | 5.49E-09  | 9    | 37   | 0.0005503 |
| 4741 | 12   | 23   | 2    | 21   | 0.0001871 | 5    | 49   | 2.54E-08  |
| 4753 | 124  | 141  | 154  | 100  | 9.44E-06  | 235  | 197  | 2.95E-05  |
| 4757 | 17   | 114  | 34   | 76   | 0.0010664 | 51   | 148  | 6.23E-08  |
| 4758 | 90   | 54   | 70   | 35   | 4.89E-05  | 125  | 86   | 1.54E-05  |
| 4759 | 724  | 227  | 814  | 158  | 1.19E-127 | 1338 | 357  | 7.78E-187 |
| 4765 | 11   | 84   | 4    | 39   | 2.43E-07  | 20   | 152  | 2.72E-20  |
| 4781 | 159  | 199  | 132  | 75   | 8.60E-07  | 237  | 221  | 0.0015983 |
| 4783 | 159  | 143  | 180  | 101  | 4.78E-09  | 243  | 173  | 8.56E-09  |
| 4784 | 394  | 322  | 362  | 199  | 1.72E-17  | 710  | 663  | 3.91E-08  |
| 4789 | 55   | 28   | 68   | 22   | 3.06E-08  | 57   | 32   | 0.0002426 |
| 4796 | 234  | 259  | 267  | 164  | 1.87E-10  | 333  | 294  | 1.12E-05  |
| 4799 | 8    | 9    | 13   | 0    | 4.89E-05  | 10   | 1    | 0.003515  |
| 4804 | 10   | 2    | 22   | 4    | 9.44E-05  | 46   | 6    | 3.98E-11  |
| 4817 | 228  | 170  | 279  | 94   | 2.15E-28  | 357  | 269  | 2.16E-10  |
| 4826 | 108  | 85   | 137  | 54   | 3.24E-12  | 199  | 114  | 1.07E-11  |
| 4829 | 18   | 8    | 55   | 12   | 3.71E-09  | 40   | 12   | 2.09E-06  |
| 4840 | 153  | 115  | 159  | 83   | 2.96E-09  | 216  | 158  | 2.20E-07  |
| 4850 | 114  | 81   | 122  | 70   | 3.00E-06  | 168  | 141  | 0.0004594 |
| 4855 | 141  | 49   | 145  | 43   | 1.50E-17  | 206  | 75   | 8.36E-23  |
| 4859 | 74   | 351  | 129  | 392  | 1.45E-24  | 220  | 888  | 1.26E-65  |
| 4860 | 113  | 142  | 161  | 56   | 1.76E-16  | 217  | 207  | 0.0045722 |
| 4869 | 33   | 7    | 38   | 3    | 6.83E-10  | 42   | 14   | 4.70E-06  |
| 4876 | 183  | 182  | 216  | 169  | 0.0002259 | 411  | 341  | 1.42E-08  |
| 4881 | 2399 | 4013 | 2318 | 3590 | 3.97E-30  | 4712 | 7496 | 4.06E-37  |
| 4898 | 161  | 131  | 144  | 84   | 7.21E-07  | 219  | 214  | 0.0089922 |
| 4911 | 140  | 43   | 225  | 25   | 9.34E-48  | 232  | 70   | 1.45E-30  |
| 4918 | 4    | 46   | 7    | 37   | 2.69E-05  | 13   | 78   | 1.14E-09  |
| 4923 | 20   | 118  | 48   | 214  | 1.10E-21  | 53   | 250  | 5.98E-23  |
| 4926 | 61   | 251  | 143  | 463  | 1.94E-31  | 219  | 770  | 6.71E-48  |
| 4929 | 53   | 185  | 38   | 207  | 1.27E-24  | 129  | 243  | 0.0001666 |
| 4930 | 80   | 127  | 66   | 129  | 0.0004083 | 146  | 267  | 0.0002396 |
| 4948 | 53   | 179  | 34   | 170  | 4.09E-19  | 89   | 288  | 8.87E-17  |
| 4976 | 51   | 51   | 98   | 69   | 0.0018704 | 91   | 56   | 2.00E-05  |
| 4977 | 42   | 27   | 101  | 36   | 1.50E-10  | 108  | 89   | 0.0032318 |
| 4978 | 492  | 285  | 625  | 285  | 4.86E-41  | 528  | 520  | 8.79E-05  |
| 4994 | 54   | 58   | 71   | 28   | 5.01E-07  | 102  | 65   | 1.58E-05  |
| 4997 | 15   | 35   | 15   | 44   | 0.0010034 | 26   | 96   | 1.32E-07  |
| 5005 | 32   | 84   | 36   | 160  | 1.57E-16  | 56   | 159  | 4.15E-08  |
| 5006 | 172  | 107  | 285  | 114  | 1.55E-23  | 336  | 269  | 3.68E-08  |

|      |      |      |      |      |           |      |       |           |
|------|------|------|------|------|-----------|------|-------|-----------|
| 5021 | 58   | 43   | 64   | 26   | 3.64E-06  | 103  | 76    | 0.0005032 |
| 5023 | 3    | 20   | 6    | 24   | 0.0031515 | 5    | 25    | 0.0026146 |
| 5024 | 8    | 30   | 0    | 42   | 4.18E-12  | 15   | 47    | 0.0012718 |
| 5035 | 254  | 236  | 448  | 425  | 0.0053928 | 936  | 620   | 6.81E-36  |
| 5037 | 153  | 112  | 229  | 154  | 2.62E-07  | 203  | 105   | 3.59E-14  |
| 5041 | 2    | 18   | 4    | 30   | 2.05E-05  | 5    | 57    | 5.48E-10  |
| 5046 | 81   | 98   | 193  | 119  | 7.73E-08  | 224  | 212   | 0.003247  |
| 5049 | 27   | 22   | 30   | 0    | 1.13E-10  | 44   | 18    | 2.94E-05  |
| 5051 | 39   | 24   | 33   | 13   | 0.0009227 | 45   | 23    | 0.000341  |
| 5052 | 117  | 62   | 122  | 48   | 4.21E-11  | 175  | 116   | 6.45E-08  |
| 5065 | 97   | 47   | 145  | 23   | 8.90E-27  | 40   | 15    | 2.95E-05  |
| 5066 | 7    | 59   | 26   | 79   | 5.08E-06  | 12   | 144   | 5.83E-24  |
| 5238 | 44   | 48   | 93   | 67   | 0.0041968 | 80   | 52    | 0.0002092 |
| 5239 | 1    | 4    | 0    | 9    | 0.0045666 | 1    | 13    | 0.0051741 |
| 5243 | 1906 | 5968 | 2319 | 5611 | 9.44E-219 | 3579 | 11766 | 0         |
| 5249 | 86   | 72   | 125  | 88   | 0.0004417 | 138  | 94    | 4.38E-06  |
| 5252 | 151  | 73   | 123  | 41   | 2.35E-13  | 147  | 88    | 2.48E-08  |
| 5263 | 48   | 145  | 50   | 169  | 4.19E-13  | 93   | 296   | 7.56E-17  |
| 5265 | 97   | 252  | 163  | 383  | 1.64E-15  | 208  | 598   | 2.21E-27  |
| 5268 | 15   | 31   | 39   | 12   | 1.68E-05  | 59   | 36    | 0.0005906 |
| 5272 | 89   | 79   | 119  | 71   | 1.10E-05  | 116  | 87    | 0.0002942 |
| 5277 | 118  | 212  | 190  | 307  | 0.0001849 | 212  | 383   | 2.04E-05  |
| 5279 | 3    | 14   | 0    | 26   | 1.56E-07  | 2    | 24    | 8.35E-05  |
| 5301 | 0    | 11   | 0    | 15   | 9.25E-05  | 1    | 37    | 7.46E-09  |
| 5303 | 122  | 106  | 164  | 84   | 6.51E-10  | 233  | 160   | 3.01E-09  |
| 5304 | 5    | 43   | 9    | 43   | 1.75E-05  | 24   | 70    | 0.0002388 |
| 5307 | 123  | 153  | 144  | 266  | 2.98E-06  | 176  | 327   | 2.35E-05  |
| 5316 | 445  | 466  | 713  | 672  | 0.0003043 | 889  | 689   | 1.32E-21  |
| 5323 | 241  | 157  | 233  | 90   | 1.58E-20  | 405  | 225   | 1.01E-23  |
| 5324 | 11   | 0    | 17   | 0    | 2.31E-06  | 14   | 1     | 9.91E-05  |
| 5325 | 54   | 36   | 71   | 39   | 0.0001736 | 101  | 20    | 9.64E-19  |
| 5327 | 1048 | 414  | 1325 | 405  | 5.85E-143 | 1299 | 523   | 1.08E-119 |
| 5331 | 29   | 206  | 43   | 302  | 9.54E-42  | 87   | 508   | 4.28E-54  |
| 5332 | 122  | 146  | 276  | 154  | 2.50E-13  | 306  | 241   | 5.24E-08  |
| 5334 | 625  | 589  | 700  | 651  | 0.0001331 | 1046 | 781   | 1.56E-28  |
| 5338 | 9    | 3    | 26   | 0    | 2.39E-09  | 26   | 8     | 0.00019   |
| 5341 | 92   | 301  | 209  | 581  | 3.60E-31  | 339  | 745   | 1.88E-18  |
| 5342 | 25   | 4    | 62   | 0    | 2.76E-21  | 73   | 7     | 1.20E-18  |
| 5343 | 2511 | 5085 | 3198 | 6007 | 1.76E-117 | 2764 | 5576  | 3.43E-96  |
| 5349 | 197  | 322  | 144  | 302  | 9.64E-10  | 384  | 621   | 9.28E-05  |
| 5362 | 58   | 102  | 36   | 119  | 2.22E-09  | 102  | 205   | 8.83E-05  |
| 5364 | 3    | 10   | 2    | 22   | 0.0001049 | 7    | 40    | 2.47E-05  |
| 5366 | 60   | 102  | 93   | 196  | 8.35E-07  | 130  | 269   | 1.97E-06  |
| 5367 | 10   | 51   | 2    | 39   | 4.89E-09  | 12   | 97    | 8.03E-14  |
| 5379 | 188  | 388  | 120  | 187  | 0.0084609 | 78   | 250   | 1.66E-14  |
| 5383 | 559  | 1158 | 580  | 1241 | 2.13E-37  | 1035 | 2033  | 8.21E-33  |
| 5393 | 167  | 45   | 283  | 53   | 2.63E-46  | 174  | 23    | 3.39E-38  |
| 5397 | 63   | 247  | 129  | 433  | 6.15E-31  | 265  | 598   | 3.06E-16  |
| 5398 | 26   | 95   | 37   | 185  | 1.04E-20  | 43   | 237   | 5.87E-25  |
| 5401 | 385  | 397  | 777  | 733  | 0.0001644 | 1103 | 798   | 5.45E-33  |
| 5404 | 113  | 326  | 251  | 613  | 7.53E-26  | 280  | 649   | 9.23E-19  |
| 5409 | 52   | 36   | 113  | 26   | 6.28E-17  | 129  | 47    | 1.02E-14  |
| 5417 | 176  | 119  | 204  | 145  | 1.00E-05  | 305  | 186   | 2.90E-15  |
| 5423 | 5    | 11   | 2    | 17   | 0.0018373 | 3    | 23    | 0.0005376 |
| 5431 | 92   | 45   | 77   | 39   | 2.27E-05  | 94   | 50    | 5.25E-07  |
| 5437 | 20   | 25   | 41   | 0    | 2.54E-14  | 42   | 14    | 4.70E-06  |
| 5445 | 151  | 62   | 143  | 23   | 2.93E-26  | 151  | 68    | 3.05E-13  |
| 5446 | 36   | 15   | 23   | 3    | 1.24E-05  | 67   | 25    | 3.96E-08  |
| 5455 | 71   | 41   | 45   | 18   | 0.0001125 | 105  | 38    | 2.26E-12  |
| 5475 | 236  | 655  | 317  | 728  | 1.00E-26  | 495  | 996   | 2.28E-18  |
| 5482 | 92   | 72   | 124  | 39   | 2.73E-14  | 147  | 86    | 9.91E-09  |
| 5486 | 6    | 9    | 0    | 14   | 0.000176  | 0    | 14    | 0.000485  |
| 5488 | 15   | 111  | 13   | 103  | 4.28E-16  | 44   | 149   | 6.28E-10  |
| 5490 | 3    | 23   | 0    | 25   | 3.06E-07  | 13   | 68    | 1.17E-07  |
| 5505 | 57   | 372  | 93   | 374  | 3.36E-33  | 155  | 714   | 3.86E-61  |
| 5506 | 41   | 22   | 44   | 21   | 0.000706  | 71   | 36    | 5.57E-06  |

|      |      |      |      |      |           |      |      |           |
|------|------|------|------|------|-----------|------|------|-----------|
| 5509 | 212  | 122  | 225  | 60   | 5.84E-29  | 196  | 177  | 0.0014608 |
| 5510 | 497  | 464  | 537  | 208  | 4.74E-45  | 503  | 372  | 6.15E-15  |
| 5516 | 43   | 27   | 55   | 21   | 8.07E-06  | 71   | 14   | 1.29E-13  |
| 5522 | 45   | 17   | 46   | 8    | 7.97E-09  | 40   | 24   | 0.0037024 |
| 5524 | 354  | 410  | 428  | 397  | 0.0026687 | 717  | 656  | 4.85E-09  |
| 5528 | 163  | 442  | 194  | 576  | 2.36E-34  | 335  | 1004 | 2.36E-48  |
| 5539 | 48   | 96   | 42   | 92   | 0.0003626 | 79   | 189  | 7.35E-07  |
| 5549 | 61   | 34   | 118  | 67   | 2.90E-06  | 148  | 103  | 4.11E-06  |
| 5554 | 189  | 79   | 232  | 89   | 1.78E-20  | 195  | 94   | 2.83E-15  |
| 5558 | 10   | 16   | 24   | 9    | 0.0027798 | 40   | 22   | 0.0019088 |
| 5562 | 56   | 19   | 72   | 8    | 4.37E-16  | 88   | 48   | 2.33E-06  |
| 5591 | 20   | 5    | 35   | 13   | 0.0002512 | 66   | 16   | 3.00E-11  |
| 5657 | 0    | 7    | 2    | 15   | 0.0056043 | 1    | 15   | 0.0016393 |
| 5686 | 60   | 40   | 56   | 13   | 6.87E-09  | 85   | 69   | 0.0073194 |
| 5689 | 43   | 144  | 47   | 139  | 2.50E-09  | 136  | 296  | 6.47E-08  |
| 5696 | 54   | 225  | 91   | 189  | 1.93E-06  | 100  | 619  | 1.22E-68  |
| 5724 | 2415 | 435  | 4047 | 778  | 0         | 2718 | 485  | 0         |
| 5768 | 451  | 1301 | 100  | 254  | 1.77E-12  | 127  | 295  | 2.42E-09  |
| 5770 | 965  | 800  | 263  | 179  | 6.14E-08  | 372  | 237  | 1.28E-16  |
| 5776 | 213  | 142  | 214  | 55   | 1.79E-28  | 222  | 192  | 0.0001638 |
| 5801 | 67   | 36   | 87   | 52   | 0.0001686 | 93   | 58   | 2.50E-05  |
| 5807 | 200  | 154  | 149  | 113  | 0.0009966 | 244  | 159  | 6.99E-11  |
| 5819 | 49   | 80   | 57   | 32   | 0.0013009 | 127  | 88   | 1.83E-05  |
| 5828 | 400  | 791  | 535  | 1045 | 1.26E-24  | 556  | 1187 | 3.32E-26  |
| 5832 | 107  | 102  | 103  | 31   | 1.59E-12  | 145  | 104  | 1.28E-05  |
| 5836 | 58   | 27   | 120  | 27   | 2.58E-18  | 75   | 17   | 3.21E-13  |
| 5838 | 8    | 39   | 13   | 39   | 0.0019532 | 22   | 69   | 8.09E-05  |
| 5846 | 16   | 66   | 4    | 69   | 1.16E-14  | 36   | 101  | 1.47E-05  |
| 5847 | 15   | 46   | 27   | 64   | 0.0014771 | 54   | 125  | 0.0001165 |
| 5851 | 30   | 61   | 18   | 82   | 3.95E-09  | 53   | 191  | 2.05E-13  |
| 5853 | 80   | 69   | 93   | 21   | 1.94E-14  | 138  | 90   | 9.61E-07  |
| 5859 | 122  | 87   | 97   | 35   | 4.27E-10  | 160  | 148  | 0.0082303 |
| 5864 | 176  | 86   | 163  | 45   | 8.01E-21  | 215  | 97   | 2.60E-18  |
| 5872 | 239  | 212  | 418  | 287  | 1.85E-11  | 354  | 284  | 1.70E-08  |
| 5873 | 4    | 39   | 16   | 49   | 0.0004102 | 26   | 87   | 3.91E-06  |
| 5948 | 20   | 12   | 34   | 17   | 0.0046804 | 60   | 40   | 0.001742  |
| 5953 | 79   | 448  | 75   | 533  | 3.06E-73  | 197  | 956  | 1.52E-85  |
| 5958 | 91   | 33   | 139  | 52   | 3.39E-13  | 224  | 58   | 1.93E-33  |
| 5960 | 45   | 52   | 79   | 36   | 2.13E-06  | 118  | 100  | 0.0041037 |
| 5973 | 14   | 23   | 2    | 23   | 5.87E-05  | 11   | 56   | 1.71E-06  |
| 5976 | 395  | 1489 | 505  | 2277 | 1.04E-217 | 746  | 2914 | 6.43E-203 |
| 5978 | 64   | 48   | 89   | 47   | 1.39E-05  | 81   | 61   | 0.0029762 |
| 5984 | 141  | 302  | 159  | 480  | 1.46E-29  | 215  | 659  | 1.30E-33  |
| 5986 | 242  | 156  | 212  | 176  | 0.0015859 | 471  | 287  | 8.43E-23  |
| 5989 | 92   | 398  | 135  | 541  | 4.19E-47  | 208  | 1195 | 1.38E-123 |
| 5992 | 7    | 55   | 6    | 63   | 1.23E-11  | 31   | 88   | 4.34E-05  |
| 5997 | 38   | 20   | 48   | 19   | 4.03E-05  | 56   | 36   | 0.0015613 |
| 6000 | 268  | 277  | 420  | 360  | 5.68E-05  | 506  | 454  | 1.91E-07  |
| 6003 | 27   | 13   | 30   | 10   | 0.0003635 | 57   | 16   | 4.80E-09  |
| 6005 | 1    | 14   | 0    | 50   | 2.53E-14  | 5    | 62   | 3.73E-11  |
| 6010 | 85   | 165  | 128  | 440  | 1.99E-32  | 170  | 327  | 4.82E-06  |
| 6011 | 874  | 668  | 1191 | 996  | 2.06E-13  | 1953 | 1170 | 7.68E-93  |
| 6015 | 148  | 114  | 260  | 152  | 1.82E-11  | 261  | 155  | 4.99E-14  |
| 6019 | 63   | 26   | 70   | 24   | 6.22E-08  | 74   | 51   | 0.0011049 |
| 6020 | 279  | 283  | 425  | 137  | 1.71E-44  | 475  | 447  | 1.18E-05  |
| 6026 | 24   | 7    | 59   | 6    | 6.03E-14  | 39   | 10   | 7.25E-07  |
| 6027 | 125  | 49   | 188  | 117  | 1.48E-07  | 225  | 101  | 2.59E-19  |
| 6030 | 16   | 138  | 29   | 181  | 5.89E-24  | 60   | 316  | 1.56E-31  |
| 6037 | 236  | 90   | 364  | 69   | 6.80E-59  | 439  | 186  | 5.00E-39  |
| 6039 | 117  | 316  | 150  | 281  | 7.68E-07  | 317  | 731  | 1.09E-20  |
| 6040 | 707  | 360  | 699  | 237  | 2.84E-68  | 1343 | 530  | 6.45E-127 |
| 6043 | 312  | 335  | 380  | 354  | 0.0054903 | 673  | 690  | 0.0001857 |
| 6048 | 644  | 438  | 626  | 227  | 9.42E-57  | 803  | 480  | 2.23E-39  |
| 6052 | 132  | 321  | 182  | 467  | 5.56E-22  | 171  | 560  | 6.14E-32  |
| 6056 | 108  | 90   | 100  | 45   | 6.43E-08  | 131  | 88   | 4.52E-06  |
| 6057 | 54   | 49   | 74   | 33   | 3.67E-06  | 138  | 93   | 3.02E-06  |

|      |      |      |      |      |           |      |      |           |
|------|------|------|------|------|-----------|------|------|-----------|
| 6066 | 113  | 42   | 58   | 24   | 1.17E-05  | 129  | 60   | 5.05E-11  |
| 6069 | 244  | 197  | 330  | 200  | 6.09E-13  | 420  | 243  | 9.73E-23  |
| 6108 | 36   | 145  | 39   | 176  | 2.64E-18  | 81   | 354  | 1.57E-29  |
| 6132 | 63   | 40   | 51   | 10   | 3.16E-09  | 63   | 47   | 0.0070434 |
| 6133 | 107  | 195  | 149  | 286  | 2.37E-07  | 256  | 420  | 0.0007471 |
| 6135 | 30   | 12   | 35   | 1    | 4.88E-11  | 29   | 9    | 0.0001036 |
| 6149 | 3    | 7    | 15   | 0    | 1.06E-05  | 16   | 6    | 0.0090664 |
| 6150 | 42   | 22   | 63   | 11   | 1.17E-11  | 82   | 52   | 0.0001137 |
| 6153 | 36   | 23   | 28   | 0    | 5.19E-10  | 61   | 45   | 0.0079932 |
| 6170 | 6    | 47   | 8    | 36   | 0.000113  | 8    | 50   | 9.30E-07  |
| 6171 | 16   | 87   | 16   | 157  | 2.81E-26  | 46   | 223  | 4.88E-21  |
| 6173 | 85   | 51   | 103  | 78   | 0.0057778 | 191  | 140  | 1.29E-06  |
| 6175 | 20   | 50   | 24   | 100  | 3.36E-10  | 47   | 101  | 0.0021217 |
| 6182 | 189  | 178  | 240  | 167  | 6.08E-07  | 417  | 277  | 8.82E-17  |
| 6203 | 24   | 11   | 25   | 5    | 5.83E-05  | 45   | 14   | 1.03E-06  |
| 6204 | 125  | 152  | 243  | 167  | 3.02E-07  | 306  | 217  | 9.88E-11  |
| 6206 | 29   | 139  | 30   | 110  | 8.13E-10  | 52   | 384  | 2.17E-48  |
| 6223 | 159  | 66   | 193  | 43   | 8.64E-29  | 236  | 89   | 8.32E-25  |
| 6232 | 87   | 37   | 118  | 28   | 2.28E-17  | 123  | 59   | 3.01E-10  |
| 6236 | 15   | 1    | 15   | 0    | 1.06E-05  | 12   | 1    | 0.0004409 |
| 6239 | 798  | 547  | 968  | 660  | 2.76E-25  | 951  | 649  | 8.25E-34  |
| 6242 | 132  | 44   | 158  | 21   | 1.58E-31  | 105  | 37   | 9.94E-13  |
| 6249 | 92   | 183  | 97   | 186  | 2.85E-05  | 142  | 259  | 0.000347  |
| 6251 | 251  | 214  | 237  | 149  | 6.44E-09  | 254  | 218  | 3.60E-05  |
| 6252 | 268  | 882  | 319  | 540  | 2.28E-08  | 154  | 581  | 3.90E-40  |
| 6254 | 97   | 29   | 84   | 20   | 1.45E-12  | 165  | 53   | 5.98E-21  |
| 6256 | 73   | 48   | 44   | 15   | 1.87E-05  | 70   | 55   | 0.0090065 |
| 6261 | 0    | 51   | 2    | 24   | 3.28E-05  | 2    | 87   | 7.64E-20  |
| 6262 | 252  | 90   | 366  | 74   | 1.12E-56  | 406  | 127  | 1.85E-50  |
| 6269 | 2    | 15   | 8    | 27   | 0.0059207 | 10   | 44   | 9.26E-05  |
| 6270 | 338  | 296  | 354  | 161  | 5.16E-24  | 403  | 244  | 5.21E-20  |
| 6310 | 1    | 22   | 0    | 23   | 5.65E-07  | 1    | 30   | 4.44E-07  |
| 6313 | 96   | 34   | 119  | 19   | 3.08E-22  | 149  | 40   | 5.13E-22  |
| 6328 | 22   | 125  | 17   | 117  | 7.54E-17  | 71   | 283  | 1.12E-21  |
| 6329 | 871  | 1000 | 1227 | 1140 | 3.53E-07  | 2486 | 2133 | 2.72E-38  |
| 6333 | 56   | 48   | 99   | 48   | 5.00E-07  | 100  | 76   | 0.001049  |
| 6339 | 88   | 68   | 46   | 23   | 0.0009944 | 94   | 75   | 0.0040369 |
| 6341 | 23   | 6    | 27   | 0    | 1.11E-09  | 20   | 4    | 0.0001179 |
| 6349 | 1848 | 2301 | 2353 | 2366 | 7.44E-06  | 5027 | 4115 | 6.26E-93  |
| 6353 | 0    | 11   | 0    | 19   | 7.15E-06  | 1    | 40   | 2.15E-09  |
| 6356 | 173  | 89   | 100  | 46   | 1.14E-07  | 238  | 64   | 2.11E-34  |
| 6362 | 32   | 26   | 29   | 13   | 0.0047777 | 52   | 28   | 0.0002651 |
| 6372 | 28   | 6    | 39   | 0    | 1.17E-13  | 24   | 1    | 4.73E-08  |
| 6381 | 137  | 87   | 172  | 85   | 6.69E-11  | 180  | 162  | 0.0022612 |
| 6382 | 110  | 43   | 72   | 34   | 1.39E-05  | 118  | 65   | 5.67E-08  |
| 6393 | 42   | 33   | 39   | 18   | 0.0012404 | 57   | 35   | 0.0007338 |
| 6395 | 34   | 177  | 56   | 182  | 2.20E-13  | 34   | 280  | 5.98E-38  |
| 6407 | 53   | 27   | 52   | 4    | 2.10E-13  | 57   | 35   | 0.0007338 |
| 6424 | 144  | 160  | 242  | 117  | 2.10E-15  | 363  | 251  | 2.40E-13  |
| 6425 | 86   | 62   | 90   | 42   | 7.20E-07  | 122  | 85   | 3.25E-05  |
| 6429 | 21   | 51   | 41   | 110  | 1.15E-06  | 45   | 108  | 0.0001706 |
| 6456 | 90   | 15   | 145  | 7    | 3.97E-39  | 175  | 17   | 7.35E-43  |
| 6457 | 36   | 42   | 32   | 10   | 0.0001386 | 57   | 42   | 0.0084701 |
| 6466 | 52   | 10   | 71   | 8    | 8.22E-16  | 136  | 76   | 9.31E-09  |
| 6467 | 198  | 127  | 185  | 58   | 8.60E-21  | 263  | 184  | 8.54E-10  |
| 6468 | 175  | 78   | 211  | 47   | 2.64E-31  | 297  | 104  | 2.15E-33  |
| 6539 | 75   | 69   | 102  | 51   | 8.41E-07  | 123  | 104  | 0.003211  |
| 6543 | 0    | 34   | 2    | 24   | 3.28E-05  | 11   | 132  | 4.84E-22  |
| 6550 | 103  | 68   | 142  | 94   | 3.57E-05  | 203  | 153  | 1.82E-06  |
| 6558 | 172  | 205  | 255  | 183  | 1.20E-06  | 324  | 327  | 0.0057144 |
| 6562 | 168  | 96   | 160  | 81   | 7.91E-10  | 153  | 98   | 1.48E-07  |
| 6568 | 518  | 295  | 587  | 158  | 2.69E-72  | 710  | 415  | 1.34E-36  |
| 6573 | 165  | 161  | 146  | 92   | 6.37E-06  | 233  | 157  | 1.02E-09  |
| 6574 | 45   | 152  | 72   | 145  | 7.27E-05  | 61   | 249  | 1.22E-19  |
| 6575 | 19   | 12   | 14   | 2    | 0.0015291 | 18   | 6    | 0.0032441 |
| 6576 | 70   | 116  | 67   | 120  | 0.0032897 | 139  | 246  | 0.0012057 |

|      |     |     |     |      |           |      |      |           |
|------|-----|-----|-----|------|-----------|------|------|-----------|
| 6602 | 879 | 792 | 964 | 456  | 1.00E-58  | 1857 | 1236 | 9.80E-69  |
| 6608 | 59  | 43  | 83  | 33   | 6.48E-08  | 101  | 72   | 0.0002242 |
| 6610 | 62  | 28  | 82  | 23   | 5.11E-11  | 68   | 16   | 9.69E-12  |
| 6613 | 29  | 127 | 27  | 130  | 1.53E-14  | 67   | 207  | 1.19E-11  |
| 6626 | 163 | 310 | 221 | 343  | 0.00045   | 296  | 482  | 0.0004573 |
| 6632 | 122 | 37  | 83  | 24   | 7.79E-11  | 91   | 41   | 1.77E-08  |
| 6640 | 35  | 14  | 73  | 9    | 1.39E-15  | 87   | 31   | 1.57E-10  |
| 6645 | 46  | 193 | 27  | 269  | 1.44E-44  | 113  | 331  | 2.09E-16  |
| 6646 | 20  | 68  | 23  | 65   | 0.0001008 | 26   | 76   | 0.0001277 |
| 6745 | 89  | 74  | 108 | 84   | 0.0090343 | 205  | 141  | 2.77E-08  |
| 6772 | 33  | 67  | 29  | 91   | 5.20E-07  | 81   | 159  | 0.0009046 |
| 6794 | 709 | 430 | 943 | 376  | 1.16E-74  | 1336 | 784  | 6.71E-67  |
| 6800 | 215 | 173 | 241 | 148  | 1.52E-09  | 395  | 310  | 5.41E-10  |
| 6803 | 15  | 36  | 4   | 29   | 3.46E-05  | 26   | 100  | 4.05E-08  |
| 6804 | 92  | 43  | 101 | 24   | 4.50E-15  | 107  | 45   | 1.24E-10  |
| 6808 | 51  | 140 | 58  | 145  | 2.09E-07  | 84   | 234  | 5.34E-11  |
| 6824 | 3   | 7   | 0   | 10   | 0.0023681 | 2    | 21   | 0.0004479 |
| 6828 | 107 | 82  | 125 | 40   | 4.06E-14  | 158  | 72   | 1.01E-13  |
| 6829 | 52  | 46  | 33  | 10   | 8.49E-05  | 84   | 61   | 0.0010719 |
| 6830 | 678 | 389 | 732 | 295  | 1.79E-57  | 700  | 356  | 9.35E-47  |
| 6832 | 98  | 19  | 178 | 23   | 8.64E-36  | 197  | 47   | 2.21E-31  |
| 6837 | 5   | 7   | 21  | 1    | 2.34E-06  | 25   | 10   | 0.0017641 |
| 6842 | 153 | 131 | 163 | 68   | 2.33E-13  | 287  | 174  | 1.16E-14  |
| 6843 | 268 | 139 | 293 | 136  | 1.50E-19  | 374  | 181  | 8.96E-28  |
| 6844 | 22  | 24  | 39  | 11   | 1.11E-05  | 75   | 44   | 6.04E-05  |
| 6863 | 46  | 29  | 60  | 12   | 2.39E-10  | 70   | 28   | 6.67E-08  |
| 6872 | 136 | 127 | 174 | 103  | 6.65E-08  | 239  | 222  | 0.001206  |
| 6873 | 225 | 198 | 234 | 173  | 1.15E-05  | 428  | 336  | 9.61E-11  |
| 6888 | 171 | 288 | 149 | 322  | 5.33E-11  | 237  | 506  | 5.12E-12  |
| 6905 | 6   | 28  | 0   | 13   | 0.0003359 | 2    | 23   | 0.0001461 |
| 7015 | 85  | 99  | 117 | 55   | 1.61E-08  | 147  | 110  | 4.10E-05  |
| 7024 | 0   | 15  | 1   | 12   | 0.0043204 | 0    | 18   | 3.68E-05  |
| 7036 | 4   | 1   | 16  | 0    | 4.95E-06  | 15   | 3    | 0.0012249 |
| 7039 | 221 | 174 | 210 | 107  | 2.35E-12  | 224  | 144  | 2.14E-10  |
| 7045 | 8   | 4   | 11  | 0    | 0.0002251 | 26   | 7    | 6.98E-05  |
| 7048 | 288 | 203 | 304 | 144  | 1.56E-19  | 420  | 336  | 6.62E-10  |
| 7050 | 108 | 79  | 95  | 23   | 6.02E-14  | 196  | 181  | 0.0030821 |
| 7083 | 50  | 41  | 41  | 10   | 1.45E-06  | 60   | 43   | 0.0052789 |
| 7091 | 11  | 12  | 5   | 22   | 0.0033068 | 7    | 26   | 0.0079116 |
| 7117 | 24  | 21  | 45  | 14   | 5.02E-06  | 54   | 23   | 5.43E-06  |
| 7118 | 163 | 473 | 219 | 544  | 6.15E-24  | 329  | 1080 | 2.76E-60  |
| 7122 | 151 | 65  | 321 | 158  | 3.10E-19  | 304  | 157  | 1.06E-20  |
| 7125 | 122 | 57  | 30  | 10   | 0.0003635 | 83   | 33   | 5.01E-09  |
| 7130 | 102 | 88  | 140 | 91   | 2.20E-05  | 231  | 181  | 1.78E-06  |
| 7236 | 23  | 69  | 24  | 69   | 6.20E-05  | 56   | 151  | 3.70E-07  |
| 7244 | 450 | 219 | 561 | 313  | 2.11E-25  | 702  | 393  | 2.11E-39  |
| 7247 | 28  | 123 | 49  | 210  | 1.56E-20  | 76   | 279  | 2.53E-19  |
| 7250 | 639 | 403 | 789 | 578  | 2.04E-16  | 759  | 515  | 1.00E-27  |
| 7251 | 290 | 666 | 428 | 1033 | 1.82E-41  | 776  | 1742 | 1.01E-43  |
| 7252 | 75  | 31  | 116 | 75   | 0.0001103 | 202  | 49   | 8.29E-32  |
| 7254 | 1   | 23  | 6   | 31   | 0.0001866 | 5    | 43   | 5.67E-07  |
| 7260 | 108 | 90  | 193 | 165  | 0.0058399 | 271  | 198  | 5.23E-09  |
| 7262 | 466 | 680 | 711 | 1120 | 2.25E-11  | 1091 | 1547 | 0.0022303 |
| 7265 | 225 | 159 | 346 | 287  | 5.54E-05  | 380  | 224  | 5.35E-20  |
| 7266 | 14  | 228 | 23  | 297  | 2.68E-54  | 29   | 454  | 8.40E-80  |
| 7287 | 66  | 89  | 58  | 120  | 0.0001617 | 121  | 227  | 0.0003555 |
| 7295 | 68  | 58  | 123 | 69   | 1.44E-06  | 134  | 60   | 4.23E-12  |
| 7298 | 72  | 96  | 79  | 166  | 6.42E-06  | 110  | 217  | 9.32E-05  |
| 7321 | 43  | 11  | 61  | 6    | 1.59E-14  | 55   | 16   | 2.30E-08  |
| 7322 | 138 | 132 | 136 | 88   | 2.94E-05  | 200  | 180  | 0.0013371 |
| 7323 | 87  | 54  | 97  | 18   | 5.64E-17  | 126  | 82   | 3.40E-06  |
| 7325 | 128 | 61  | 185 | 27   | 3.35E-35  | 177  | 88   | 1.98E-13  |
| 7328 | 0   | 20  | 0   | 15   | 9.25E-05  | 0    | 31   | 2.17E-08  |
| 7329 | 0   | 23  | 0   | 9    | 0.0045666 | 0    | 67   | 1.34E-17  |
| 7330 | 8   | 57  | 8   | 38   | 4.47E-05  | 26   | 93   | 4.11E-07  |
| 7340 | 205 | 147 | 244 | 100  | 9.04E-20  | 195  | 172  | 0.0007546 |



|      |      |      |      |      |           |      |      |           |
|------|------|------|------|------|-----------|------|------|-----------|
| 7341 | 67   | 75   | 105  | 55   | 1.54E-06  | 160  | 109  | 7.59E-07  |
| 7346 | 106  | 43   | 62   | 18   | 2.70E-08  | 92   | 38   | 1.43E-09  |
| 7352 | 24   | 7    | 59   | 7    | 3.25E-13  | 68   | 15   | 2.83E-12  |
| 7357 | 145  | 106  | 186  | 156  | 0.004047  | 204  | 122  | 4.31E-11  |
| 7358 | 32   | 18   | 49   | 19   | 2.61E-05  | 70   | 32   | 1.08E-06  |
| 7373 | 26   | 8    | 33   | 0    | 1.14E-11  | 28   | 10   | 0.0004283 |
| 7375 | 29   | 36   | 46   | 16   | 1.66E-05  | 79   | 55   | 0.000883  |
| 7376 | 28   | 30   | 36   | 15   | 0.0006471 | 60   | 20   | 4.68E-08  |
| 7388 | 273  | 673  | 394  | 887  | 9.73E-31  | 758  | 1751 | 1.90E-47  |
| 7389 | 125  | 113  | 96   | 48   | 1.46E-06  | 117  | 95   | 0.0017991 |
| 7407 | 442  | 269  | 673  | 293  | 2.29E-47  | 1109 | 479  | 1.39E-93  |
| 7409 | 89   | 75   | 97   | 70   | 0.0031424 | 164  | 106  | 7.63E-08  |
| 7420 | 31   | 13   | 26   | 5    | 3.29E-05  | 36   | 12   | 2.72E-05  |
| 7421 | 20   | 9    | 12   | 1    | 0.0010641 | 23   | 6    | 0.0002197 |
| 7423 | 10   | 20   | 9    | 36   | 0.0002681 | 26   | 77   | 9.09E-05  |
| 7424 | 74   | 403  | 77   | 571  | 2.77E-80  | 166  | 1073 | 1.43E-121 |
| 7429 | 18   | 290  | 46   | 403  | 2.13E-62  | 55   | 527  | 4.50E-76  |
| 7432 | 633  | 941  | 845  | 1361 | 4.18E-15  | 1256 | 1810 | 0.0001932 |
| 7435 | 1193 | 1341 | 1309 | 924  | 6.59E-30  | 2783 | 2422 | 5.57E-40  |
| 7437 | 35   | 101  | 58   | 114  | 0.0007315 | 81   | 213  | 4.41E-09  |
| 7438 | 193  | 201  | 265  | 148  | 1.04E-12  | 536  | 367  | 1.50E-19  |
| 7443 | 13   | 3    | 33   | 10   | 8.49E-05  | 33   | 8    | 4.09E-06  |
| 7446 | 1    | 12   | 0    | 10   | 0.0023681 | 4    | 21   | 0.0041472 |
| 7447 | 37   | 305  | 119  | 357  | 4.05E-22  | 116  | 782  | 1.18E-91  |
| 7448 | 95   | 223  | 135  | 257  | 1.35E-06  | 180  | 574  | 2.31E-31  |
| 7460 | 12   | 20   | 16   | 61   | 3.20E-06  | 18   | 51   | 0.0022676 |
| 7469 | 21   | 108  | 10   | 113  | 2.09E-20  | 40   | 238  | 1.90E-26  |
| 7471 | 179  | 111  | 332  | 239  | 3.48E-08  | 489  | 302  | 5.65E-23  |
| 7481 | 11   | 187  | 11   | 327  | 3.78E-73  | 38   | 533  | 7.17E-90  |
| 7484 | 4    | 25   | 3    | 42   | 8.83E-09  | 4    | 128  | 1.53E-27  |
| 7486 | 24   | 36   | 26   | 95   | 1.37E-08  | 64   | 131  | 0.0011516 |
| 7487 | 24   | 62   | 44   | 117  | 7.19E-07  | 56   | 167  | 4.31E-09  |
| 7489 | 132  | 426  | 208  | 917  | 8.15E-87  | 314  | 1164 | 6.09E-77  |
| 7492 | 165  | 110  | 187  | 121  | 7.78E-07  | 255  | 189  | 3.35E-08  |
| 7494 | 19   | 50   | 43   | 82   | 0.0069503 | 34   | 108  | 6.74E-07  |
| 7499 | 59   | 48   | 89   | 38   | 1.00E-07  | 109  | 55   | 1.44E-08  |
| 7500 | 92   | 69   | 122  | 42   | 8.30E-13  | 181  | 118  | 2.44E-08  |
| 7506 | 130  | 274  | 111  | 182  | 0.0027895 | 197  | 430  | 4.49E-11  |
| 7521 | 43   | 39   | 89   | 54   | 0.0002053 | 90   | 73   | 0.0056877 |
| 7531 | 837  | 711  | 949  | 596  | 1.97E-31  | 1471 | 1259 | 1.39E-23  |
| 7550 | 27   | 45   | 22   | 53   | 0.0025422 | 37   | 96   | 0.0001095 |
| 7551 | 26   | 20   | 21   | 4    | 0.0001705 | 36   | 19   | 0.0024899 |
| 7553 | 105  | 111  | 90   | 56   | 0.00033   | 174  | 151  | 0.0009601 |
| 7560 | 147  | 123  | 164  | 137  | 0.0065616 | 259  | 172  | 5.81E-11  |
| 7568 | 88   | 41   | 96   | 61   | 0.000295  | 125  | 75   | 3.26E-07  |
| 7576 | 56   | 38   | 50   | 20   | 3.39E-05  | 94   | 58   | 1.82E-05  |
| 7590 | 271  | 235  | 345  | 105  | 1.39E-38  | 470  | 316  | 3.78E-18  |
| 7594 | 550  | 701  | 671  | 554  | 1.12E-08  | 604  | 656  | 0.009867  |
| 7597 | 134  | 91   | 121  | 64   | 2.87E-07  | 237  | 134  | 3.97E-14  |
| 7600 | 53   | 162  | 74   | 152  | 3.20E-05  | 122  | 383  | 7.64E-21  |
| 7604 | 38   | 28   | 63   | 20   | 6.32E-08  | 76   | 40   | 5.44E-06  |
| 7606 | 287  | 194  | 312  | 132  | 1.01E-23  | 305  | 230  | 4.59E-09  |
| 7619 | 4    | 72   | 1    | 23   | 1.06E-05  | 4    | 94   | 2.20E-19  |
| 7625 | 37   | 27   | 31   | 16   | 0.0083578 | 80   | 48   | 3.78E-05  |
| 7628 | 0    | 28   | 0    | 29   | 2.08E-08  | 4    | 63   | 3.85E-12  |
| 7638 | 51   | 148  | 20   | 66   | 1.09E-05  | 47   | 209  | 2.93E-18  |
| 7640 | 257  | 240  | 265  | 241  | 0.0097204 | 393  | 372  | 9.65E-05  |
| 7642 | 67   | 85   | 183  | 93   | 6.17E-11  | 153  | 71   | 6.04E-13  |
| 7661 | 10   | 38   | 18   | 56   | 9.87E-05  | 30   | 84   | 9.51E-05  |
| 7664 | 61   | 105  | 99   | 52   | 3.83E-06  | 114  | 79   | 4.47E-05  |
| 7666 | 47   | 87   | 34   | 73   | 0.0025025 | 71   | 206  | 1.92E-10  |
| 7670 | 46   | 365  | 61   | 152  | 9.47E-08  | 107  | 621  | 1.71E-65  |
| 7676 | 339  | 1441 | 459  | 1206 | 6.33E-57  | 838  | 2723 | 9.22E-147 |
| 7684 | 43   | 23   | 54   | 32   | 0.003293  | 81   | 59   | 0.0015595 |
| 7689 | 8    | 46   | 3    | 39   | 5.23E-08  | 18   | 101  | 1.44E-11  |
| 7693 | 62   | 59   | 110  | 57   | 7.61E-07  | 118  | 77   | 6.67E-06  |

|      |     |      |      |      |           |      |      |           |
|------|-----|------|------|------|-----------|------|------|-----------|
| 7701 | 74  | 47   | 68   | 36   | 0.0001599 | 108  | 46   | 1.67E-10  |
| 7702 | 69  | 38   | 92   | 10   | 2.10E-20  | 103  | 49   | 6.39E-09  |
| 7703 | 196 | 118  | 256  | 100  | 4.45E-22  | 175  | 139  | 5.23E-05  |
| 7706 | 0   | 13   | 0    | 8    | 0.008835  | 0    | 9    | 0.0058059 |
| 7708 | 59  | 23   | 62   | 19   | 6.74E-08  | 89   | 36   | 2.00E-09  |
| 7720 | 76  | 52   | 87   | 42   | 2.18E-06  | 113  | 66   | 5.18E-07  |
| 7724 | 73  | 21   | 59   | 27   | 4.99E-05  | 114  | 44   | 1.68E-12  |
| 7740 | 20  | 182  | 83   | 174  | 4.34E-06  | 64   | 292  | 1.23E-25  |
| 7742 | 46  | 39   | 67   | 28   | 2.70E-06  | 76   | 61   | 0.0097139 |
| 7743 | 149 | 206  | 235  | 163  | 7.53E-07  | 259  | 237  | 0.0004178 |
| 7759 | 35  | 96   | 24   | 62   | 0.000485  | 58   | 196  | 1.61E-12  |
| 7763 | 74  | 269  | 130  | 304  | 1.90E-12  | 191  | 622  | 5.70E-35  |
| 7766 | 207 | 219  | 337  | 204  | 2.91E-13  | 435  | 321  | 3.19E-13  |
| 7773 | 1   | 25   | 5    | 22   | 0.0033068 | 0    | 34   | 3.16E-09  |
| 7781 | 0   | 24   | 0    | 63   | 1.02E-17  | 7    | 33   | 0.0006253 |
| 7785 | 12  | 33   | 4    | 60   | 2.53E-12  | 22   | 69   | 8.09E-05  |
| 7786 | 2   | 21   | 3    | 18   | 0.0033896 | 5    | 62   | 3.73E-11  |
| 7805 | 74  | 61   | 76   | 47   | 0.0007846 | 137  | 124  | 0.0087793 |
| 7807 | 227 | 376  | 303  | 506  | 1.70E-07  | 546  | 825  | 0.0008218 |
| 7810 | 845 | 1921 | 1233 | 2030 | 3.29E-24  | 2056 | 4263 | 2.04E-81  |
| 7814 | 132 | 526  | 173  | 801  | 1.07E-79  | 269  | 1295 | 1.54E-114 |
| 7817 | 187 | 146  | 236  | 113  | 2.95E-15  | 292  | 204  | 1.03E-10  |
| 7821 | 32  | 87   | 66   | 127  | 0.0005159 | 60   | 166  | 4.30E-08  |
| 7823 | 25  | 217  | 47   | 320  | 1.93E-43  | 78   | 542  | 2.32E-65  |
| 7825 | 6   | 26   | 0    | 47   | 1.71E-13  | 3    | 35   | 1.50E-06  |
| 7831 | 109 | 86   | 154  | 65   | 1.89E-12  | 180  | 125  | 3.27E-07  |
| 7847 | 107 | 80   | 67   | 30   | 9.23E-06  | 136  | 114  | 0.0014322 |
| 7853 | 22  | 101  | 19   | 63   | 1.85E-05  | 52   | 171  | 8.24E-11  |
| 7860 | 336 | 219  | 358  | 135  | 1.36E-31  | 453  | 293  | 3.18E-19  |
| 7868 | 20  | 121  | 15   | 88   | 7.02E-12  | 41   | 340  | 5.12E-46  |
| 7869 | 9   | 481  | 31   | 330  | 6.44E-56  | 60   | 903  | 3.66E-155 |
| 7870 | 21  | 114  | 3    | 108  | 1.01E-25  | 29   | 303  | 3.51E-46  |
| 7875 | 6   | 30   | 2    | 35   | 5.16E-08  | 4    | 46   | 2.82E-08  |
| 7891 | 28  | 9    | 27   | 8    | 0.0002854 | 23   | 8    | 0.0009238 |
| 7897 | 127 | 245  | 129  | 294  | 1.68E-11  | 322  | 529  | 0.0001446 |
| 8008 | 4   | 31   | 0    | 15   | 9.25E-05  | 14   | 51   | 0.0001532 |
| 8020 | 25  | 97   | 54   | 123  | 1.52E-05  | 89   | 163  | 0.0042498 |
| 8021 | 7   | 45   | 0    | 42   | 4.18E-12  | 15   | 81   | 3.13E-09  |
| 8028 | 188 | 96   | 217  | 44   | 2.84E-34  | 131  | 97   | 7.76E-05  |
| 8030 | 176 | 192  | 268  | 190  | 3.76E-07  | 342  | 299  | 4.62E-06  |
| 8037 | 385 | 396  | 445  | 315  | 4.87E-11  | 727  | 657  | 1.05E-09  |
| 8048 | 161 | 128  | 209  | 83   | 6.52E-18  | 298  | 216  | 5.50E-10  |
| 8052 | 87  | 210  | 151  | 316  | 4.04E-10  | 233  | 445  | 1.64E-07  |
| 8055 | 259 | 428  | 410  | 996  | 1.25E-40  | 500  | 958  | 7.49E-15  |
| 8127 | 3   | 35   | 15   | 51   | 9.80E-05  | 18   | 94   | 3.53E-10  |
| 8131 | 8   | 33   | 18   | 105  | 1.09E-13  | 28   | 124  | 2.24E-11  |
| 8135 | 8   | 188  | 20   | 379  | 5.60E-77  | 28   | 845  | 9.44E-173 |
| 8144 | 86  | 186  | 130  | 302  | 3.40E-12  | 182  | 478  | 1.10E-18  |
| 8153 | 587 | 982  | 908  | 1576 | 5.02E-24  | 1240 | 1806 | 5.98E-05  |
| 8155 | 84  | 44   | 175  | 67   | 8.73E-16  | 242  | 93   | 7.79E-25  |
| 8167 | 42  | 26   | 69   | 29   | 2.24E-06  | 99   | 68   | 0.0001226 |
| 8173 | 107 | 64   | 185  | 104  | 3.74E-09  | 156  | 61   | 2.44E-16  |
| 8175 | 159 | 469  | 243  | 740  | 2.95E-45  | 481  | 849  | 1.66E-09  |
| 8178 | 35  | 185  | 60   | 320  | 1.09E-36  | 76   | 413  | 7.70E-42  |
| 8180 | 375 | 680  | 699  | 1063 | 5.36E-09  | 792  | 1512 | 3.03E-22  |
| 8186 | 194 | 313  | 262  | 436  | 1.38E-06  | 430  | 658  | 0.0014956 |
| 8188 | 251 | 161  | 401  | 263  | 1.08E-12  | 476  | 315  | 4.88E-19  |
| 8197 | 51  | 50   | 109  | 78   | 0.0015622 | 159  | 134  | 0.0007745 |
| 8199 | 39  | 21   | 49   | 31   | 0.009705  | 66   | 51   | 0.0090963 |
| 8200 | 92  | 95   | 163  | 88   | 6.00E-09  | 175  | 104  | 7.69E-10  |
| 8204 | 88  | 141  | 104  | 270  | 1.39E-13  | 171  | 325  | 8.97E-06  |
| 8205 | 83  | 521  | 120  | 866  | 6.13E-119 | 216  | 1176 | 2.06E-116 |
| 8212 | 14  | 38   | 11   | 90   | 1.79E-14  | 24   | 124  | 4.70E-13  |
| 8218 | 692 | 447  | 903  | 641  | 8.62E-21  | 1134 | 756  | 1.81E-42  |
| 8219 | 54  | 27   | 78   | 21   | 9.11E-11  | 97   | 29   | 1.01E-13  |
| 8223 | 233 | 164  | 291  | 173  | 3.80E-12  | 274  | 172  | 5.22E-13  |

|      |      |      |      |      |           |      |      |           |
|------|------|------|------|------|-----------|------|------|-----------|
| 8240 | 58   | 25   | 74   | 39   | 6.38E-05  | 61   | 26   | 1.35E-06  |
| 8243 | 108  | 173  | 116  | 274  | 1.35E-11  | 129  | 298  | 2.96E-09  |
| 8252 | 31   | 70   | 45   | 122  | 2.25E-07  | 53   | 148  | 1.69E-07  |
| 8254 | 186  | 278  | 300  | 457  | 0.0001277 | 461  | 728  | 0.0001152 |
| 8257 | 12   | 62   | 24   | 85   | 1.30E-07  | 49   | 162  | 2.41E-10  |
| 8258 | 2    | 19   | 7    | 44   | 8.40E-07  | 13   | 52   | 5.02E-05  |
| 8297 | 72   | 154  | 84   | 308  | 6.16E-25  | 61   | 125  | 0.0014719 |
| 8299 | 41   | 14   | 60   | 29   | 0.0001063 | 99   | 18   | 2.29E-19  |
| 8306 | 145  | 286  | 199  | 331  | 2.81E-05  | 294  | 495  | 6.78E-05  |
| 8307 | 1    | 8    | 0    | 24   | 3.00E-07  | 4    | 50   | 3.22E-09  |
| 8311 | 334  | 194  | 661  | 247  | 1.56E-57  | 884  | 424  | 2.56E-64  |
| 8312 | 25   | 26   | 17   | 45   | 0.0030848 | 10   | 46   | 3.93E-05  |
| 8319 | 10   | 73   | 9    | 154  | 2.66E-31  | 25   | 194  | 6.04E-26  |
| 8327 | 563  | 445  | 844  | 676  | 3.44E-12  | 938  | 584  | 7.87E-42  |
| 8328 | 10   | 105  | 6    | 220  | 3.00E-51  | 12   | 315  | 1.36E-63  |
| 8330 | 1089 | 840  | 1588 | 1127 | 2.40E-35  | 2551 | 1515 | 7.28E-123 |
| 8338 | 81   | 24   | 147  | 32   | 1.89E-22  | 154  | 44   | 1.38E-21  |
| 8339 | 91   | 62   | 165  | 126  | 0.0006322 | 235  | 162  | 3.58E-09  |
| 8340 | 374  | 1476 | 618  | 2392 | 3.39E-195 | 920  | 3820 | 1.00E-285 |
| 8345 | 20   | 83   | 22   | 190  | 6.92E-30  | 45   | 227  | 3.44E-22  |
| 8347 | 121  | 591  | 178  | 974  | 5.80E-111 | 290  | 1464 | 3.92E-135 |
| 8349 | 111  | 125  | 123  | 268  | 1.25E-09  | 209  | 335  | 0.0057162 |
| 8353 | 20   | 121  | 21   | 189  | 2.99E-30  | 43   | 278  | 1.08E-32  |
| 8362 | 0    | 2    | 0    | 20   | 3.79E-06  | 0    | 12   | 0.0018112 |
| 8364 | 126  | 105  | 123  | 64   | 1.46E-07  | 214  | 180  | 7.33E-05  |
| 8365 | 70   | 43   | 85   | 56   | 0.0012741 | 132  | 95   | 3.15E-05  |
| 8368 | 187  | 156  | 237  | 157  | 7.44E-08  | 328  | 295  | 3.17E-05  |
| 8369 | 114  | 65   | 80   | 27   | 4.35E-09  | 76   | 43   | 2.64E-05  |
| 8371 | 21   | 34   | 26   | 81   | 2.41E-06  | 46   | 120  | 1.45E-05  |
| 8373 | 172  | 372  | 225  | 425  | 7.19E-10  | 386  | 736  | 1.47E-11  |
| 8376 | 93   | 238  | 102  | 405  | 1.96E-35  | 218  | 593  | 1.63E-24  |
| 8378 | 85   | 85   | 128  | 61   | 5.38E-09  | 167  | 98   | 1.30E-09  |
| 8379 | 194  | 404  | 220  | 393  | 1.02E-07  | 312  | 571  | 6.67E-08  |
| 8381 | 288  | 581  | 517  | 1182 | 5.98E-42  | 847  | 1311 | 2.05E-06  |
| 8382 | 92   | 197  | 99   | 295  | 2.62E-18  | 160  | 372  | 1.83E-11  |
| 8384 | 126  | 198  | 152  | 241  | 0.0016928 | 221  | 444  | 6.63E-09  |
| 8385 | 40   | 25   | 46   | 20   | 0.0001786 | 72   | 53   | 0.0037862 |
| 8394 | 1095 | 1000 | 1583 | 1324 | 2.36E-17  | 2136 | 1609 | 7.89E-55  |
| 8398 | 92   | 138  | 59   | 140  | 1.54E-06  | 143  | 294  | 8.26E-07  |
| 8410 | 37   | 17   | 54   | 29   | 0.0008719 | 22   | 9    | 0.0033747 |
| 8416 | 191  | 125  | 295  | 187  | 1.65E-10  | 395  | 295  | 1.19E-11  |
| 8441 | 94   | 64   | 240  | 95   | 2.56E-20  | 182  | 108  | 3.50E-10  |
| 8442 | 748  | 638  | 1030 | 895  | 1.34E-09  | 1764 | 1047 | 1.23E-85  |
| 8444 | 199  | 510  | 295  | 1072 | 3.39E-82  | 433  | 1438 | 4.43E-81  |
| 8448 | 20   | 62   | 37   | 82   | 0.0006401 | 65   | 151  | 1.99E-05  |
| 8451 | 162  | 156  | 348  | 280  | 1.04E-05  | 450  | 341  | 1.40E-12  |
| 8455 | 94   | 9    | 113  | 15   | 4.82E-23  | 154  | 11   | 2.88E-41  |
| 8457 | 41   | 40   | 70   | 35   | 4.89E-05  | 88   | 63   | 0.0007305 |
| 8458 | 106  | 173  | 166  | 365  | 6.73E-13  | 223  | 387  | 0.0001059 |
| 8466 | 220  | 138  | 432  | 302  | 3.65E-11  | 553  | 310  | 2.80E-31  |
| 8475 | 63   | 6    | 100  | 29   | 1.08E-12  | 112  | 10   | 1.20E-28  |
| 8476 | 120  | 64   | 189  | 103  | 5.07E-10  | 283  | 137  | 2.08E-21  |
| 8483 | 117  | 189  | 117  | 328  | 1.75E-18  | 287  | 468  | 0.0004944 |
| 8486 | 109  | 50   | 129  | 66   | 5.04E-08  | 211  | 78   | 5.83E-23  |
| 8488 | 20   | 21   | 31   | 11   | 0.0005078 | 44   | 30   | 0.0098342 |
| 8492 | 48   | 201  | 57   | 276  | 1.34E-29  | 124  | 415  | 9.41E-25  |
| 8494 | 32   | 131  | 61   | 219  | 9.89E-18  | 99   | 304  | 2.70E-16  |
| 8502 | 58   | 43   | 140  | 47   | 4.76E-15  | 133  | 84   | 6.85E-07  |
| 8503 | 229  | 110  | 424  | 184  | 1.18E-30  | 505  | 191  | 2.43E-51  |
| 8504 | 146  | 101  | 206  | 161  | 0.0002949 | 284  | 214  | 1.46E-08  |
| 8517 | 213  | 427  | 374  | 855  | 8.30E-31  | 430  | 866  | 3.12E-16  |
| 8531 | 31   | 73   | 20   | 47   | 0.0066976 | 47   | 219  | 6.58E-20  |
| 8535 | 36   | 197  | 40   | 188  | 4.26E-20  | 29   | 184  | 8.34E-22  |
| 8537 | 76   | 703  | 88   | 384  | 6.62E-37  | 187  | 1266 | 1.09E-147 |
| 8552 | 323  | 632  | 434  | 1014 | 4.64E-38  | 719  | 1411 | 3.50E-23  |
| 8553 | 0    | 9    | 3    | 18   | 0.0033896 | 3    | 22   | 0.0008987 |

|      |     |      |     |      |           |      |      |           |
|------|-----|------|-----|------|-----------|------|------|-----------|
| 8561 | 284 | 161  | 331 | 133  | 6.31E-27  | 353  | 208  | 1.20E-18  |
| 8562 | 106 | 44   | 133 | 40   | 5.45E-16  | 156  | 73   | 4.34E-13  |
| 8564 | 392 | 186  | 351 | 148  | 9.78E-27  | 587  | 320  | 5.61E-35  |
| 8571 | 66  | 163  | 60  | 198  | 1.37E-14  | 143  | 297  | 5.34E-07  |
| 8572 | 152 | 75   | 267 | 130  | 1.38E-16  | 307  | 118  | 2.66E-31  |
| 8575 | 14  | 3    | 43  | 9    | 1.58E-07  | 34   | 5    | 3.72E-08  |
| 8577 | 168 | 339  | 273 | 522  | 2.58E-12  | 338  | 799  | 7.17E-24  |
| 8579 | 54  | 195  | 119 | 348  | 7.08E-21  | 186  | 394  | 1.91E-09  |
| 8597 | 295 | 309  | 508 | 470  | 0.000852  | 737  | 655  | 1.22E-10  |
| 8599 | 34  | 128  | 36  | 243  | 3.41E-33  | 76   | 326  | 9.79E-27  |
| 8602 | 350 | 1128 | 421 | 1767 | 7.46E-158 | 677  | 2633 | 1.09E-182 |
| 8607 | 9   | 453  | 39  | 746  | 1.20E-150 | 57   | 1177 | 6.92E-221 |
| 8610 | 65  | 57   | 75  | 46   | 0.0007172 | 99   | 49   | 4.52E-08  |
| 8614 | 44  | 27   | 60  | 9    | 3.89E-12  | 87   | 27   | 4.41E-12  |
| 8616 | 74  | 21   | 97  | 34   | 2.02E-10  | 118  | 42   | 5.10E-14  |
| 8622 | 11  | 5    | 10  | 0    | 0.000483  | 39   | 7    | 1.83E-08  |
| 8626 | 59  | 228  | 77  | 484  | 9.19E-62  | 115  | 650  | 4.85E-67  |
| 8632 | 270 | 540  | 382 | 930  | 3.37E-38  | 721  | 1346 | 3.18E-18  |
| 8634 | 21  | 15   | 27  | 7    | 0.0001108 | 44   | 28   | 0.0059635 |
| 8635 | 43  | 254  | 96  | 416  | 1.13E-39  | 118  | 698  | 1.35E-74  |
| 8639 | 69  | 31   | 57  | 37   | 0.0070211 | 142  | 38   | 4.79E-21  |
| 8641 | 363 | 281  | 548 | 517  | 0.0015515 | 802  | 547  | 8.99E-29  |
| 8645 | 55  | 26   | 57  | 28   | 0.000184  | 114  | 34   | 6.70E-16  |
| 8658 | 103 | 70   | 138 | 86   | 8.53E-06  | 225  | 151  | 1.80E-09  |
| 8660 | 163 | 115  | 268 | 175  | 5.09E-09  | 486  | 300  | 8.28E-23  |
| 8669 | 70  | 120  | 65  | 131  | 0.0001812 | 143  | 250  | 0.0016143 |
| 8670 | 165 | 425  | 243 | 589  | 1.62E-24  | 227  | 674  | 1.91E-32  |
| 8676 | 6   | 26   | 9   | 29   | 0.0051277 | 23   | 76   | 1.67E-05  |
| 8677 | 15  | 52   | 29  | 80   | 2.89E-05  | 38   | 104  | 2.02E-05  |
| 8713 | 63  | 256  | 123 | 482  | 2.75E-41  | 228  | 633  | 3.84E-27  |
| 8717 | 148 | 115  | 301 | 101  | 1.07E-30  | 400  | 178  | 1.73E-33  |
| 8720 | 40  | 81   | 91  | 174  | 5.88E-05  | 108  | 209  | 0.000229  |
| 8726 | 76  | 58   | 85  | 44   | 1.24E-05  | 138  | 61   | 1.53E-12  |
| 8728 | 56  | 33   | 89  | 28   | 9.68E-11  | 115  | 86   | 0.000276  |
| 8729 | 168 | 136  | 299 | 209  | 3.87E-08  | 460  | 277  | 6.47E-23  |
| 8736 | 142 | 65   | 153 | 87   | 1.22E-07  | 254  | 146  | 1.47E-14  |
| 8749 | 457 | 439  | 650 | 476  | 8.22E-14  | 1120 | 718  | 2.57E-46  |
| 8751 | 140 | 62   | 106 | 2    | 1.19E-32  | 60   | 16   | 8.92E-10  |
| 8760 | 4   | 11   | 0   | 20   | 3.79E-06  | 7    | 29   | 0.0022907 |
| 8761 | 144 | 271  | 204 | 453  | 6.32E-16  | 355  | 711  | 2.76E-13  |
| 8762 | 76  | 221  | 61  | 174  | 1.22E-10  | 101  | 292  | 2.84E-14  |
| 8766 | 65  | 56   | 86  | 56   | 0.000979  | 152  | 66   | 5.17E-14  |
| 8771 | 117 | 251  | 214 | 371  | 1.15E-06  | 401  | 726  | 2.68E-09  |
| 8777 | 39  | 88   | 27  | 67   | 0.0005715 | 77   | 145  | 0.0044415 |
| 8783 | 27  | 4    | 61  | 9    | 2.12E-12  | 34   | 7    | 6.47E-07  |
| 8786 | 46  | 132  | 78  | 179  | 1.22E-07  | 101  | 220  | 2.81E-06  |
| 8788 | 33  | 70   | 51  | 109  | 0.0001801 | 110  | 205  | 0.0007968 |
| 8789 | 67  | 28   | 116 | 70   | 1.78E-05  | 110  | 27   | 9.77E-18  |
| 8790 | 39  | 72   | 62  | 108  | 0.0088024 | 74   | 187  | 1.33E-07  |
| 8791 | 155 | 279  | 215 | 385  | 1.17E-07  | 333  | 571  | 5.97E-06  |
| 8795 | 75  | 117  | 226 | 341  | 0.0013596 | 340  | 516  | 0.007253  |
| 8801 | 45  | 30   | 94  | 70   | 0.0061275 | 89   | 50   | 3.24E-06  |
| 8805 | 66  | 188  | 57  | 239  | 9.75E-23  | 150  | 373  | 2.43E-13  |
| 8807 | 131 | 136  | 223 | 83   | 1.76E-20  | 200  | 152  | 2.76E-06  |
| 8817 | 29  | 30   | 26  | 68   | 0.0002532 | 39   | 82   | 0.0077913 |
| 8818 | 79  | 207  | 94  | 228  | 2.60E-10  | 159  | 486  | 5.17E-25  |
| 8821 | 173 | 73   | 261 | 94   | 1.05E-24  | 535  | 139  | 2.54E-77  |
| 8824 | 102 | 88   | 181 | 65   | 9.91E-18  | 248  | 199  | 2.27E-06  |
| 8825 | 123 | 142  | 137 | 49   | 8.76E-14  | 183  | 135  | 2.49E-06  |
| 8829 | 23  | 105  | 45  | 102  | 9.20E-05  | 58   | 203  | 1.21E-13  |
| 8831 | 1   | 12   | 3   | 21   | 0.0006951 | 1    | 24   | 1.66E-05  |
| 8852 | 174 | 140  | 268 | 102  | 1.13E-23  | 285  | 217  | 2.80E-08  |
| 8874 | 19  | 132  | 43  | 145  | 2.06E-11  | 59   | 264  | 8.30E-23  |
| 8876 | 220 | 442  | 382 | 572  | 4.88E-05  | 493  | 1112 | 7.15E-29  |
| 8877 | 30  | 22   | 54  | 10   | 5.56E-10  | 31   | 6    | 1.07E-06  |
| 8880 | 119 | 116  | 151 | 98   | 1.04E-05  | 248  | 247  | 0.0099043 |

|      |      |      |      |      |           |      |      |           |
|------|------|------|------|------|-----------|------|------|-----------|
| 8886 | 43   | 20   | 30   | 4    | 7.26E-07  | 80   | 35   | 5.19E-08  |
| 8903 | 312  | 680  | 394  | 607  | 4.22E-06  | 658  | 1588 | 2.74E-48  |
| 8904 | 199  | 116  | 269  | 177  | 7.59E-09  | 393  | 255  | 7.84E-17  |
| 8909 | 51   | 108  | 98   | 168  | 0.0013744 | 117  | 236  | 2.16E-05  |
| 8913 | 35   | 184  | 67   | 292  | 2.00E-28  | 60   | 394  | 3.96E-46  |
| 8917 | 17   | 11   | 23   | 9    | 0.0043845 | 44   | 17   | 1.38E-05  |
| 8918 | 4    | 14   | 1    | 23   | 1.06E-05  | 9    | 33   | 0.0027991 |
| 8923 | 31   | 118  | 65   | 173  | 1.43E-09  | 96   | 243  | 1.84E-09  |
| 8924 | 55   | 59   | 95   | 61   | 0.0003868 | 164  | 120  | 6.66E-06  |
| 8937 | 85   | 141  | 136  | 262  | 5.81E-07  | 167  | 285  | 0.0017496 |
| 8939 | 80   | 132  | 151  | 348  | 1.15E-13  | 176  | 335  | 6.46E-06  |
| 8941 | 108  | 191  | 248  | 407  | 7.62E-06  | 341  | 525  | 0.0036224 |
| 8944 | 100  | 68   | 106  | 69   | 0.0002547 | 202  | 102  | 9.65E-15  |
| 8945 | 53   | 142  | 53   | 140  | 6.58E-08  | 152  | 296  | 9.09E-06  |
| 8946 | 101  | 82   | 195  | 104  | 1.14E-10  | 217  | 145  | 3.23E-09  |
| 8947 | 90   | 159  | 158  | 288  | 1.92E-06  | 162  | 333  | 1.74E-07  |
| 8953 | 194  | 299  | 373  | 537  | 0.000695  | 439  | 722  | 7.95E-06  |
| 8954 | 96   | 185  | 137  | 467  | 5.19E-34  | 190  | 477  | 5.53E-17  |
| 8959 | 93   | 82   | 127  | 76   | 5.75E-06  | 145  | 116  | 0.0002899 |
| 8970 | 55   | 16   | 64   | 11   | 6.63E-12  | 102  | 19   | 1.34E-19  |
| 8973 | 97   | 56   | 98   | 54   | 1.35E-05  | 86   | 58   | 0.0002801 |
| 8974 | 107  | 93   | 128  | 57   | 7.92E-10  | 149  | 123  | 0.0006079 |
| 8975 | 4    | 45   | 13   | 43   | 0.00041   | 17   | 120  | 1.47E-15  |
| 8984 | 28   | 103  | 39   | 200  | 1.03E-22  | 68   | 261  | 3.49E-19  |
| 8987 | 206  | 502  | 279  | 756  | 2.37E-38  | 385  | 768  | 4.13E-14  |
| 8990 | 71   | 354  | 128  | 768  | 4.71E-94  | 211  | 1071 | 9.51E-100 |
| 8996 | 18   | 52   | 28   | 111  | 1.14E-10  | 41   | 113  | 6.84E-06  |
| 9007 | 43   | 9    | 51   | 17   | 2.33E-06  | 94   | 9    | 8.90E-24  |
| 9008 | 54   | 41   | 15   | 0    | 1.06E-05  | 23   | 9    | 0.0020908 |
| 9010 | 12   | 47   | 21   | 70   | 4.43E-06  | 10   | 39   | 0.0007605 |
| 9021 | 253  | 275  | 137  | 90   | 3.44E-05  | 199  | 190  | 0.0068244 |
| 9022 | 22   | 13   | 39   | 0    | 1.17E-13  | 46   | 11   | 2.47E-08  |
| 9026 | 115  | 36   | 145  | 51   | 1.19E-14  | 246  | 62   | 2.85E-37  |
| 9028 | 89   | 37   | 128  | 16   | 2.26E-26  | 179  | 45   | 1.64E-27  |
| 9031 | 170  | 375  | 198  | 349  | 9.55E-07  | 225  | 517  | 7.51E-15  |
| 9049 | 33   | 16   | 56   | 19   | 1.13E-06  | 38   | 21   | 0.0023424 |
| 9050 | 153  | 117  | 297  | 102  | 1.46E-29  | 314  | 205  | 1.45E-13  |
| 9051 | 31   | 178  | 22   | 73   | 4.04E-06  | 76   | 226  | 6.81E-12  |
| 9054 | 0    | 10   | 0    | 12   | 0.0006424 | 2    | 15   | 0.0063446 |
| 9055 | 0    | 10   | 0    | 15   | 9.25E-05  | 1    | 12   | 0.0091866 |
| 9073 | 14   | 68   | 15   | 78   | 8.95E-10  | 42   | 114  | 1.10E-05  |
| 9074 | 109  | 175  | 105  | 190  | 0.0001425 | 190  | 348  | 2.45E-05  |
| 9083 | 130  | 94   | 179  | 109  | 1.23E-07  | 284  | 145  | 9.97E-20  |
| 9085 | 59   | 139  | 94   | 153  | 0.007327  | 105  | 268  | 1.46E-10  |
| 9105 | 135  | 164  | 136  | 80   | 1.52E-06  | 211  | 203  | 0.0074815 |
| 9106 | 90   | 50   | 101  | 63   | 0.0001551 | 156  | 109  | 2.27E-06  |
| 9113 | 164  | 120  | 174  | 73   | 4.66E-14  | 275  | 204  | 9.92E-09  |
| 9122 | 15   | 56   | 19   | 83   | 5.92E-09  | 15   | 101  | 6.27E-13  |
| 9128 | 58   | 125  | 108  | 218  | 9.06E-07  | 101  | 237  | 6.58E-08  |
| 9165 | 95   | 66   | 80   | 48   | 0.0003603 | 185  | 105  | 3.12E-11  |
| 9171 | 7    | 3    | 13   | 2    | 0.0028098 | 16   | 2    | 0.0001418 |
| 9183 | 60   | 71   | 77   | 36   | 4.56E-06  | 126  | 102  | 0.0010487 |
| 9184 | 21   | 10   | 19   | 7    | 0.0093272 | 36   | 10   | 3.82E-06  |
| 9190 | 45   | 114  | 78   | 138  | 0.0020906 | 101  | 224  | 1.37E-06  |
| 9191 | 81   | 182  | 86   | 187  | 5.39E-07  | 116  | 259  | 1.30E-07  |
| 9192 | 1183 | 3099 | 1822 | 4698 | 6.83E-209 | 2764 | 5529 | 1.66E-92  |
| 9196 | 463  | 242  | 572  | 310  | 1.34E-27  | 355  | 212  | 2.76E-18  |
| 9206 | 182  | 149  | 172  | 97   | 1.37E-08  | 233  | 211  | 0.0005744 |
| 9208 | 0    | 57   | 1    | 106  | 6.92E-28  | 10   | 156  | 2.69E-28  |
| 9249 | 289  | 776  | 318  | 722  | 8.18E-26  | 415  | 1205 | 1.09E-54  |
| 9259 | 100  | 60   | 127  | 40   | 1.01E-14  | 193  | 90   | 8.00E-16  |
| 9266 | 34   | 16   | 36   | 6    | 1.93E-07  | 43   | 20   | 0.0001823 |
| 9271 | 33   | 27   | 49   | 24   | 0.0005723 | 69   | 46   | 0.0009372 |
| 9272 | 91   | 40   | 90   | 39   | 1.24E-07  | 129  | 75   | 6.28E-08  |
| 9281 | 98   | 79   | 111  | 85   | 0.0051753 | 150  | 124  | 0.0006349 |
| 9331 | 57   | 28   | 104  | 10   | 4.91E-24  | 69   | 27   | 7.64E-08  |

|      |     |      |     |      |           |      |      |           |
|------|-----|------|-----|------|-----------|------|------|-----------|
| 9334 | 33  | 12   | 46  | 0    | 5.58E-16  | 41   | 7    | 5.01E-09  |
| 9338 | 158 | 125  | 178 | 83   | 2.65E-12  | 353  | 271  | 9.73E-10  |
| 9354 | 203 | 96   | 265 | 62   | 1.46E-37  | 375  | 116  | 2.96E-47  |
| 9357 | 335 | 259  | 354 | 153  | 6.79E-26  | 473  | 428  | 9.30E-07  |
| 9368 | 206 | 48   | 148 | 23   | 1.49E-27  | 91   | 32   | 3.22E-11  |
| 9370 | 578 | 688  | 569 | 406  | 1.99E-13  | 933  | 916  | 1.19E-07  |
| 9383 | 696 | 2026 | 832 | 1578 | 3.42E-33  | 1238 | 3947 | 1.36E-205 |
| 9395 | 66  | 49   | 71  | 28   | 5.01E-07  | 105  | 67   | 1.45E-05  |
| 9396 | 310 | 296  | 426 | 226  | 7.27E-22  | 643  | 545  | 1.32E-11  |
| 9399 | 39  | 20   | 34  | 9    | 1.98E-05  | 35   | 13   | 0.0001058 |
| 9426 | 55  | 21   | 101 | 31   | 4.10E-12  | 119  | 35   | 1.33E-16  |
| 9432 | 5   | 2    | 9   | 0    | 0.0010365 | 10   | 1    | 0.003515  |
| 9435 | 373 | 678  | 374 | 741  | 1.19E-18  | 545  | 1031 | 3.91E-15  |
| 9437 | 114 | 45   | 128 | 42   | 3.27E-14  | 150  | 58   | 5.87E-16  |
| 9440 | 93  | 403  | 147 | 769  | 7.08E-85  | 312  | 1052 | 3.96E-61  |
| 9444 | 34  | 35   | 65  | 19   | 1.60E-08  | 91   | 73   | 0.0045514 |
| 9445 | 82  | 214  | 105 | 274  | 6.18E-14  | 264  | 436  | 0.0004573 |
| 9446 | 104 | 219  | 155 | 320  | 7.49E-10  | 276  | 490  | 3.68E-06  |
| 9449 | 573 | 420  | 768 | 325  | 3.14E-56  | 871  | 603  | 6.88E-30  |
| 9453 | 384 | 261  | 391 | 262  | 1.17E-11  | 634  | 275  | 5.73E-54  |
| 9469 | 11  | 17   | 22  | 7    | 0.0022687 | 22   | 9    | 0.0033747 |
| 9471 | 3   | 10   | 0   | 24   | 3.00E-07  | 5    | 29   | 0.000391  |
| 9474 | 76  | 66   | 73  | 19   | 1.61E-10  | 113  | 77   | 2.88E-05  |
| 9475 | 22  | 3    | 23  | 9    | 0.0043845 | 44   | 12   | 2.31E-07  |
| 9482 | 71  | 73   | 146 | 96   | 1.95E-05  | 186  | 130  | 2.22E-07  |
| 9493 | 283 | 170  | 351 | 106  | 1.23E-39  | 507  | 315  | 2.14E-23  |
| 9494 | 42  | 46   | 64  | 38   | 0.0013766 | 68   | 48   | 0.0026269 |
| 9496 | 106 | 36   | 9   | 0    | 0.0010365 | 32   | 9    | 1.29E-05  |
| 9500 | 1   | 11   | 16  | 40   | 0.0071012 | 11   | 33   | 0.0097015 |
| 9501 | 101 | 485  | 101 | 298  | 2.82E-18  | 191  | 936  | 1.27E-84  |
| 9504 | 1   | 12   | 0   | 22   | 1.06E-06  | 2    | 46   | 5.34E-10  |
| 9517 | 125 | 114  | 164 | 102  | 1.01E-06  | 236  | 163  | 2.98E-09  |
| 9519 | 180 | 81   | 221 | 100  | 1.07E-15  | 320  | 132  | 7.09E-30  |
| 9524 | 166 | 135  | 203 | 122  | 1.10E-08  | 263  | 194  | 1.75E-08  |
| 9531 | 3   | 18   | 0   | 44   | 1.16E-12  | 2    | 43   | 2.92E-09  |
| 9536 | 28  | 9    | 39  | 0    | 1.17E-13  | 25   | 11   | 0.0036901 |
| 9559 | 115 | 50   | 112 | 69   | 5.07E-05  | 183  | 147  | 6.21E-05  |
| 9560 | 5   | 4    | 10  | 0    | 0.000483  | 7    | 0    | 0.0033572 |
| 9582 | 75  | 58   | 121 | 69   | 2.67E-06  | 160  | 86   | 7.66E-11  |
| 9607 | 0   | 10   | 0   | 17   | 2.56E-05  | 0    | 40   | 7.68E-11  |
| 9614 | 188 | 173  | 243 | 163  | 8.95E-08  | 409  | 200  | 8.78E-30  |
| 9615 | 36  | 23   | 11  | 0    | 0.0002251 | 39   | 6    | 6.92E-09  |
| 9630 | 3   | 42   | 7   | 66   | 1.09E-11  | 8    | 126  | 5.23E-23  |
| 9637 | 51  | 35   | 112 | 35   | 4.22E-13  | 77   | 54   | 0.0010663 |
| 9647 | 23  | 22   | 36  | 16   | 0.0012193 | 59   | 26   | 4.90E-06  |
| 9662 | 61  | 77   | 121 | 51   | 4.62E-10  | 147  | 131  | 0.0044891 |
| 9701 | 576 | 1021 | 637 | 1180 | 2.67E-23  | 1084 | 1956 | 3.60E-22  |
| 9703 | 70  | 34   | 83  | 22   | 1.17E-11  | 99   | 52   | 1.71E-07  |
| 9715 | 31  | 13   | 45  | 19   | 0.0001436 | 69   | 24   | 6.56E-09  |
| 9716 | 27  | 6    | 39  | 1    | 2.55E-12  | 52   | 11   | 7.30E-10  |
| 9722 | 31  | 33   | 19  | 5    | 0.001619  | 46   | 23   | 0.0002294 |
| 9724 | 37  | 21   | 46  | 23   | 0.0009944 | 42   | 18   | 7.27E-05  |
| 9734 | 29  | 28   | 56  | 5    | 1.10E-13  | 58   | 41   | 0.0045564 |
| 9737 | 70  | 29   | 82  | 21   | 1.20E-11  | 112  | 55   | 4.52E-09  |
| 9754 | 55  | 114  | 104 | 216  | 3.86E-07  | 123  | 324  | 2.82E-13  |
| 9759 | 11  | 31   | 15  | 69   | 6.37E-08  | 19   | 53   | 0.0019554 |
| 9783 | 24  | 13   | 51  | 11   | 1.05E-08  | 60   | 25   | 1.56E-06  |
| 9785 | 49  | 118  | 75  | 194  | 4.24E-10  | 89   | 182  | 0.0001413 |
| 9793 | 76  | 161  | 120 | 254  | 1.31E-08  | 166  | 405  | 8.07E-14  |
| 9796 | 197 | 374  | 334 | 793  | 3.67E-31  | 405  | 776  | 2.67E-12  |
| 9797 | 74  | 69   | 107 | 70   | 0.0002758 | 150  | 98   | 3.62E-07  |
| 9800 | 71  | 117  | 228 | 201  | 0.0067171 | 210  | 160  | 1.73E-06  |
| 9803 | 25  | 110  | 52  | 164  | 1.06E-11  | 112  | 300  | 8.24E-13  |
| 9806 | 221 | 639  | 233 | 799  | 2.10E-57  | 377  | 1299 | 2.10E-77  |
| 9827 | 287 | 459  | 441 | 890  | 2.47E-23  | 731  | 1121 | 2.53E-05  |
| 9848 | 204 | 149  | 309 | 283  | 0.0065353 | 477  | 248  | 3.29E-31  |

|       |      |      |      |      |           |       |       |           |
|-------|------|------|------|------|-----------|-------|-------|-----------|
| 9852  | 10   | 33   | 7    | 47   | 3.00E-07  | 41    | 88    | 0.0044169 |
| 9856  | 4    | 5    | 15   | 0    | 1.06E-05  | 19    | 7     | 0.0046956 |
| 9857  | 36   | 82   | 87   | 142  | 0.0096744 | 76    | 189   | 2.29E-07  |
| 9861  | 27   | 99   | 77   | 218  | 5.37E-13  | 81    | 269   | 2.35E-16  |
| 9863  | 48   | 75   | 23   | 66   | 7.05E-05  | 52    | 118   | 0.0002714 |
| 9865  | 136  | 384  | 155  | 544  | 8.99E-41  | 305   | 987   | 5.07E-54  |
| 9869  | 66   | 181  | 45   | 273  | 1.53E-34  | 112   | 441   | 2.00E-32  |
| 9876  | 35   | 74   | 48   | 187  | 9.34E-17  | 100   | 252   | 9.85E-10  |
| 9886  | 14   | 5    | 17   | 1    | 3.57E-05  | 18    | 4     | 0.0004107 |
| 9887  | 3    | 27   | 5    | 40   | 5.58E-07  | 11    | 50    | 2.43E-05  |
| 9891  | 36   | 369  | 71   | 433  | 2.65E-54  | 110   | 670   | 2.68E-73  |
| 9892  | 10   | 114  | 13   | 180  | 3.74E-34  | 32    | 264   | 5.45E-36  |
| 9894  | 183  | 114  | 270  | 83   | 3.82E-30  | 418   | 276   | 4.55E-17  |
| 9896  | 62   | 211  | 77   | 278  | 2.24E-22  | 160   | 439   | 8.20E-19  |
| 9897  | 39   | 23   | 42   | 14   | 2.11E-05  | 104   | 60    | 1.23E-06  |
| 9904  | 38   | 31   | 63   | 31   | 7.37E-05  | 58    | 43    | 0.0090279 |
| 10159 | 21   | 38   | 41   | 122  | 2.40E-08  | 51    | 112   | 0.0008741 |
| 10161 | 19   | 40   | 6    | 33   | 6.93E-05  | 12    | 44    | 0.0004193 |
| 10164 | 60   | 257  | 68   | 488  | 1.35E-67  | 102   | 553   | 1.79E-55  |
| 10166 | 139  | 243  | 249  | 464  | 3.06E-10  | 356   | 593   | 2.43E-05  |
| 10174 | 3    | 21   | 0    | 24   | 3.00E-07  | 6     | 32    | 0.0002562 |
| 10181 | 91   | 57   | 173  | 119  | 1.69E-05  | 248   | 125   | 9.04E-18  |
| 10194 | 2    | 11   | 0    | 11   | 0.0012317 | 5     | 41    | 1.61E-06  |
| 10197 | 135  | 99   | 196  | 114  | 4.74E-09  | 308   | 143   | 1.23E-24  |
| 10198 | 396  | 236  | 212  | 94   | 1.40E-15  | 290   | 186   | 3.90E-13  |
| 10200 | 30   | 90   | 67   | 160  | 1.68E-07  | 94    | 206   | 5.19E-06  |
| 10202 | 53   | 155  | 129  | 223  | 0.0001776 | 129   | 310   | 1.67E-10  |
| 10207 | 7    | 12   | 6    | 44   | 2.46E-07  | 7     | 48    | 8.28E-07  |
| 10219 | 7    | 7    | 14   | 4    | 0.008886  | 10    | 1     | 0.003515  |
| 10239 | 71   | 34   | 63   | 31   | 7.37E-05  | 145   | 71    | 2.21E-11  |
| 10240 | 15   | 55   | 19   | 83   | 5.92E-09  | 36    | 108   | 2.02E-06  |
| 10250 | 279  | 278  | 387  | 318  | 1.14E-05  | 379   | 353   | 5.71E-05  |
| 10251 | 219  | 151  | 294  | 88   | 1.16E-33  | 345   | 203   | 2.27E-18  |
| 10261 | 195  | 163  | 256  | 99   | 3.40E-22  | 339   | 199   | 3.57E-18  |
| 10262 | 77   | 38   | 80   | 35   | 7.97E-07  | 85    | 29    | 7.34E-11  |
| 10263 | 37   | 15   | 35   | 11   | 7.79E-05  | 43    | 10    | 7.80E-08  |
| 10269 | 31   | 24   | 28   | 12   | 0.003825  | 100   | 44    | 1.31E-09  |
| 10270 | 35   | 46   | 69   | 13   | 2.62E-12  | 93    | 59    | 3.82E-05  |
| 10272 | 54   | 46   | 62   | 34   | 0.0004577 | 127   | 58    | 3.14E-11  |
| 10280 | 49   | 17   | 100  | 15   | 2.61E-19  | 58    | 23    | 8.67E-07  |
| 10286 | 420  | 237  | 512  | 343  | 8.64E-15  | 729   | 391   | 3.08E-44  |
| 10288 | 121  | 138  | 74   | 41   | 0.0001618 | 107   | 77    | 0.0001917 |
| 10298 | 46   | 22   | 76   | 50   | 0.0022973 | 85    | 64    | 0.0021792 |
| 10304 | 34   | 20   | 44   | 19   | 0.0002172 | 63    | 21    | 1.49E-08  |
| 10309 | 29   | 16   | 36   | 11   | 4.82E-05  | 69    | 9     | 4.57E-16  |
| 10320 | 12   | 27   | 13   | 38   | 0.0028483 | 20    | 80    | 4.86E-07  |
| 10340 | 88   | 58   | 127  | 57   | 1.16E-09  | 176   | 143   | 0.0001201 |
| 10343 | 140  | 228  | 198  | 470  | 4.32E-19  | 373   | 652   | 2.83E-07  |
| 10346 | 13   | 36   | 14   | 70   | 9.85E-09  | 20    | 89    | 1.78E-08  |
| 10358 | 110  | 17   | 207  | 27   | 2.44E-41  | 157   | 10    | 3.46E-43  |
| 10359 | 324  | 339  | 507  | 454  | 0.0001345 | 786   | 558   | 2.66E-25  |
| 10369 | 176  | 115  | 239  | 200  | 0.0011197 | 420   | 186   | 3.72E-35  |
| 10374 | 377  | 118  | 584  | 182  | 9.95E-63  | 781   | 157   | 6.76E-134 |
| 10387 | 467  | 323  | 646  | 566  | 3.45E-06  | 830   | 508   | 1.42E-38  |
| 10388 | 696  | 587  | 1108 | 1104 | 0.0010282 | 1277  | 893   | 7.11E-42  |
| 10397 | 0    | 2    | 6    | 37   | 9.19E-06  | 6     | 29    | 0.0009963 |
| 10398 | 322  | 261  | 313  | 230  | 2.79E-07  | 618   | 404   | 4.10E-25  |
| 10417 | 167  | 88   | 260  | 198  | 1.54E-05  | 318   | 203   | 2.00E-14  |
| 10419 | 77   | 209  | 75   | 236  | 3.49E-16  | 163   | 373   | 5.23E-11  |
| 10420 | 5753 | 5532 | 9292 | 8772 | 5.02E-39  | 13584 | 10340 | 0         |
| 10427 | 747  | 459  | 1066 | 533  | 1.35E-58  | 1596  | 630   | 1.91E-150 |
| 10432 | 131  | 243  | 215  | 437  | 2.05E-12  | 294   | 516   | 4.09E-06  |
| 10469 | 351  | 129  | 639  | 221  | 3.17E-61  | 1214  | 296   | 5.69E-182 |
| 10471 | 505  | 1199 | 757  | 1503 | 1.65E-36  | 1333  | 2471  | 3.22E-31  |
| 10543 | 14   | 95   | 15   | 75   | 3.76E-09  | 13    | 191   | 1.54E-33  |
| 10547 | 102  | 47   | 91   | 52   | 5.00E-05  | 157   | 101   | 1.11E-07  |

|       |     |      |      |      |           |      |      |           |
|-------|-----|------|------|------|-----------|------|------|-----------|
| 10548 | 12  | 3    | 8    | 0    | 0.0022242 | 16   | 5    | 0.0037785 |
| 10550 | 113 | 288  | 164  | 295  | 2.69E-06  | 244  | 513  | 1.34E-11  |
| 10578 | 67  | 33   | 102  | 64   | 0.0001295 | 136  | 75   | 5.58E-09  |
| 10580 | 47  | 237  | 102  | 358  | 2.21E-27  | 159  | 427  | 1.07E-17  |
| 10593 | 44  | 28   | 106  | 73   | 0.0009266 | 90   | 51   | 3.71E-06  |
| 10594 | 59  | 36   | 113  | 38   | 2.05E-12  | 122  | 64   | 7.98E-09  |
| 10596 | 81  | 53   | 99   | 65   | 0.0005335 | 157  | 107  | 8.45E-07  |
| 10607 | 67  | 51   | 139  | 67   | 1.80E-09  | 150  | 102  | 1.66E-06  |
| 10611 | 36  | 23   | 53   | 34   | 0.0095135 | 40   | 26   | 0.0089706 |
| 10622 | 60  | 41   | 102  | 59   | 2.42E-05  | 142  | 69   | 2.14E-11  |
| 10624 | 119 | 162  | 103  | 222  | 5.59E-08  | 173  | 350  | 1.85E-07  |
| 10628 | 4   | 7    | 1    | 26   | 1.63E-06  | 3    | 29   | 4.18E-05  |
| 10642 | 4   | 7    | 2    | 17   | 0.0018373 | 8    | 30   | 0.0048025 |
| 10644 | 9   | 13   | 30   | 11   | 0.0008002 | 38   | 10   | 1.26E-06  |
| 10645 | 37  | 26   | 48   | 12   | 1.61E-07  | 59   | 34   | 0.0002319 |
| 10649 | 25  | 63   | 36   | 99   | 2.45E-06  | 58   | 122  | 0.0011943 |
| 10659 | 35  | 97   | 58   | 222  | 3.12E-19  | 63   | 198  | 2.07E-11  |
| 10683 | 126 | 116  | 229  | 204  | 0.0092487 | 235  | 161  | 2.50E-09  |
| 10686 | 198 | 171  | 244  | 176  | 2.47E-06  | 262  | 259  | 0.0062481 |
| 10688 | 27  | 35   | 98   | 50   | 2.01E-06  | 109  | 81   | 0.0003291 |
| 10694 | 122 | 179  | 201  | 347  | 2.88E-06  | 245  | 464  | 1.37E-07  |
| 10696 | 42  | 79   | 44   | 90   | 0.0013187 | 84   | 153  | 0.0059774 |
| 10699 | 39  | 67   | 38   | 97   | 1.35E-05  | 65   | 137  | 0.0004955 |
| 10705 | 882 | 647  | 1213 | 1052 | 3.54E-11  | 1624 | 1203 | 2.17E-44  |
| 10709 | 143 | 104  | 194  | 163  | 0.0035026 | 231  | 159  | 3.67E-09  |
| 10715 | 150 | 143  | 288  | 261  | 0.0061632 | 382  | 320  | 9.50E-08  |
| 10716 | 32  | 23   | 39   | 20   | 0.0037129 | 63   | 43   | 0.0022843 |
| 10731 | 304 | 638  | 387  | 915  | 2.58E-35  | 672  | 1249 | 9.28E-17  |
| 10734 | 443 | 1047 | 675  | 1532 | 5.08E-53  | 1233 | 2944 | 1.04E-85  |
| 10743 | 2   | 14   | 3    | 26   | 4.60E-05  | 4    | 25   | 0.0006225 |
| 10771 | 48  | 53   | 65   | 29   | 1.12E-05  | 127  | 81   | 1.68E-06  |
| 10861 | 156 | 246  | 170  | 319  | 1.29E-07  | 219  | 451  | 8.78E-10  |
| 10872 | 94  | 38   | 68   | 31   | 1.13E-05  | 126  | 71   | 3.50E-08  |
| 10882 | 161 | 129  | 251  | 137  | 8.92E-13  | 333  | 231  | 2.59E-12  |
| 10883 | 131 | 133  | 227  | 126  | 2.45E-11  | 293  | 222  | 1.16E-08  |
| 10889 | 31  | 89   | 20   | 116  | 4.10E-15  | 51   | 203  | 7.16E-16  |
| 10917 | 20  | 7    | 46   | 8    | 7.97E-09  | 35   | 12   | 4.45E-05  |
| 10919 | 118 | 109  | 180  | 136  | 0.0002389 | 169  | 142  | 0.000479  |
| 10926 | 193 | 159  | 172  | 82   | 1.37E-11  | 284  | 197  | 9.98E-11  |
| 10929 | 436 | 213  | 507  | 122  | 7.10E-69  | 777  | 382  | 1.31E-54  |
| 10935 | 119 | 93   | 135  | 49   | 2.13E-13  | 208  | 129  | 1.90E-10  |
| 10937 | 165 | 145  | 201  | 125  | 5.86E-08  | 284  | 188  | 6.53E-12  |
| 10960 | 114 | 103  | 153  | 72   | 1.18E-10  | 193  | 101  | 2.31E-13  |
| 10969 | 81  | 140  | 83   | 211  | 1.70E-10  | 116  | 262  | 6.24E-08  |
| 10981 | 467 | 1193 | 168  | 263  | 0.001669  | 319  | 953  | 7.52E-46  |
| 10983 | 86  | 41   | 130  | 61   | 2.57E-09  | 137  | 103  | 8.93E-05  |
| 10984 | 0   | 17   | 3    | 29   | 8.79E-06  | 4    | 60   | 2.07E-11  |
| 10985 | 62  | 28   | 53   | 33   | 0.0065652 | 84   | 43   | 9.75E-07  |
| 10986 | 175 | 129  | 219  | 63   | 2.09E-26  | 354  | 281  | 7.82E-09  |
| 10990 | 104 | 136  | 186  | 99   | 2.89E-10  | 186  | 169  | 0.0023069 |
| 10995 | 625 | 1320 | 642  | 1004 | 6.09E-10  | 808  | 1772 | 1.67E-41  |
| 11024 | 17  | 67   | 33   | 81   | 0.0001514 | 59   | 157  | 3.16E-07  |
| 11029 | 117 | 95   | 111  | 75   | 0.0003955 | 184  | 171  | 0.0046084 |
| 11031 | 95  | 75   | 110  | 50   | 1.82E-08  | 134  | 120  | 0.0078728 |
| 11034 | 138 | 107  | 273  | 77   | 3.67E-33  | 348  | 174  | 1.06E-24  |
| 11037 | 217 | 302  | 218  | 117  | 1.41E-11  | 366  | 363  | 0.0015157 |
| 11047 | 67  | 62   | 89   | 47   | 1.39E-05  | 206  | 105  | 8.12E-15  |
| 11049 | 179 | 104  | 177  | 41   | 8.60E-26  | 155  | 98   | 8.09E-08  |
| 11053 | 0   | 40   | 0    | 39   | 2.90E-11  | 4    | 54   | 6.40E-10  |
| 11063 | 159 | 123  | 150  | 120  | 0.003372  | 333  | 292  | 7.49E-06  |
| 11066 | 23  | 53   | 11   | 33   | 0.003888  | 40   | 91   | 0.0014728 |
| 11071 | 90  | 461  | 65   | 334  | 3.32E-37  | 160  | 898  | 1.86E-91  |
| 11072 | 56  | 89   | 33   | 75   | 0.0009512 | 76   | 211  | 6.11E-10  |
| 11074 | 38  | 13   | 44   | 13   | 3.37E-06  | 62   | 42   | 0.0020816 |
| 11084 | 98  | 37   | 81   | 38   | 3.14E-06  | 37   | 23   | 0.008834  |
| 11096 | 31  | 80   | 12   | 98   | 1.00E-15  | 38   | 174  | 6.12E-16  |



|       |      |      |      |      |           |      |      |           |
|-------|------|------|------|------|-----------|------|------|-----------|
| 11097 | 60   | 56   | 73   | 34   | 9.60E-06  | 79   | 58   | 0.0018893 |
| 11099 | 129  | 58   | 102  | 8    | 5.94E-25  | 106  | 49   | 1.85E-09  |
| 11107 | 161  | 95   | 154  | 105  | 3.66E-05  | 298  | 190  | 1.33E-13  |
| 11110 | 95   | 42   | 108  | 7    | 1.12E-27  | 125  | 72   | 8.03E-08  |
| 11113 | 81   | 71   | 115  | 41   | 8.50E-12  | 139  | 116  | 0.0012637 |
| 11119 | 181  | 157  | 254  | 131  | 2.86E-14  | 321  | 223  | 6.74E-12  |
| 11120 | 134  | 95   | 137  | 70   | 1.70E-08  | 214  | 178  | 4.58E-05  |
| 11125 | 19   | 28   | 49   | 16   | 4.23E-06  | 57   | 36   | 0.001134  |
| 11126 | 557  | 852  | 645  | 1020 | 1.13E-10  | 756  | 1267 | 2.61E-10  |
| 11134 | 851  | 710  | 1001 | 499  | 1.70E-55  | 1376 | 1107 | 1.67E-28  |
| 11142 | 2    | 27   | 0    | 31   | 5.49E-09  | 9    | 57   | 1.47E-07  |
| 11143 | 5    | 99   | 32   | 187  | 1.36E-23  | 24   | 282  | 2.80E-45  |
| 11150 | 158  | 301  | 232  | 435  | 7.31E-10  | 386  | 657  | 1.79E-06  |
| 11156 | 2271 | 1912 | 3264 | 1759 | 4.10E-151 | 5471 | 3042 | 2.69E-299 |
| 11158 | 26   | 22   | 63   | 31   | 7.37E-05  | 59   | 40   | 0.0023562 |
| 11162 | 309  | 694  | 339  | 579  | 3.52E-09  | 683  | 1596 | 9.15E-45  |
| 11168 | 145  | 77   | 133  | 36   | 2.13E-17  | 170  | 87   | 2.30E-12  |
| 11169 | 5    | 3    | 14   | 0    | 2.28E-05  | 20   | 1    | 1.04E-06  |
| 11170 | 54   | 38   | 112  | 71   | 7.96E-05  | 206  | 137  | 6.33E-09  |
| 11177 | 85   | 60   | 107  | 52   | 1.68E-07  | 199  | 88   | 1.88E-17  |
| 11178 | 242  | 465  | 388  | 789  | 2.86E-21  | 605  | 1139 | 3.06E-16  |
| 11179 | 12   | 100  | 21   | 137  | 5.56E-19  | 25   | 337  | 1.05E-56  |
| 11183 | 69   | 71   | 135  | 37   | 1.29E-17  | 169  | 152  | 0.0028719 |
| 11187 | 1330 | 860  | 1324 | 417  | 1.87E-138 | 1995 | 1317 | 2.51E-75  |
| 11188 | 335  | 214  | 441  | 155  | 5.58E-42  | 553  | 411  | 4.84E-16  |
| 11196 | 199  | 124  | 211  | 41   | 3.34E-34  | 246  | 198  | 3.30E-06  |
| 11199 | 107  | 122  | 190  | 148  | 0.0004675 | 308  | 146  | 7.94E-24  |
| 11202 | 58   | 167  | 61   | 259  | 1.04E-24  | 52   | 301  | 1.63E-32  |
| 11223 | 1083 | 1571 | 1434 | 1819 | 0.0041695 | 2169 | 2934 | 0.0091419 |
| 11252 | 13   | 17   | 6    | 72   | 7.94E-14  | 18   | 70   | 4.32E-06  |
| 11260 | 290  | 617  | 462  | 725  | 1.13E-07  | 718  | 1658 | 5.22E-45  |
| 11265 | 1    | 17   | 0    | 36   | 2.04E-10  | 2    | 57   | 1.40E-12  |
| 11269 | 37   | 135  | 17   | 110  | 2.82E-15  | 39   | 243  | 6.19E-28  |
| 11271 | 52   | 58   | 44   | 25   | 0.0051886 | 55   | 37   | 0.0031789 |
| 11281 | 105  | 76   | 171  | 50   | 1.03E-20  | 132  | 94   | 2.26E-05  |
| 11283 | 215  | 130  | 305  | 77   | 1.96E-40  | 320  | 157  | 1.66E-23  |
| 11288 | 2094 | 2761 | 3113 | 3077 | 6.19E-09  | 6015 | 4030 | 8.74E-217 |
| 11323 | 93   | 144  | 95   | 185  | 1.94E-05  | 127  | 224  | 0.0021649 |
| 11347 | 81   | 29   | 74   | 25   | 1.44E-08  | 110  | 35   | 1.40E-14  |
| 11350 | 10   | 36   | 6    | 51   | 9.98E-09  | 16   | 58   | 5.64E-05  |
| 11353 | 108  | 104  | 102  | 69   | 0.0007071 | 268  | 127  | 5.76E-21  |
| 11354 | 131  | 140  | 153  | 68   | 1.22E-11  | 283  | 241  | 1.03E-05  |
| 11356 | 134  | 59   | 111  | 26   | 1.82E-16  | 144  | 72   | 5.87E-11  |
| 11358 | 14   | 23   | 6    | 40   | 1.97E-06  | 19   | 64   | 5.83E-05  |
| 11359 | 31   | 41   | 32   | 66   | 0.006055  | 55   | 134  | 1.95E-05  |
| 11360 | 109  | 126  | 195  | 71   | 1.18E-18  | 249  | 236  | 0.0021649 |
| 11362 | 253  | 45   | 267  | 69   | 5.05E-35  | 341  | 61   | 2.35E-63  |
| 11386 | 108  | 74   | 145  | 112  | 0.0017344 | 250  | 173  | 1.34E-09  |
| 11388 | 6    | 114  | 10   | 234  | 1.73E-50  | 28   | 289  | 8.47E-44  |
| 11390 | 167  | 156  | 62   | 35   | 0.0007172 | 51   | 31   | 0.0012095 |
| 11391 | 0    | 6    | 0    | 8    | 0.008835  | 0    | 12   | 0.0018112 |
| 11392 | 77   | 51   | 122  | 82   | 0.0001855 | 136  | 67   | 9.99E-11  |
| 11394 | 71   | 964  | 120  | 1571 | 1.00E-281 | 191  | 2713 | 0         |
| 11395 | 21   | 165  | 61   | 290  | 1.44E-30  | 52   | 392  | 3.78E-50  |
| 11398 | 12   | 78   | 27   | 126  | 9.87E-14  | 51   | 207  | 1.45E-16  |
| 11403 | 3    | 25   | 3    | 40   | 2.89E-08  | 2    | 29   | 5.17E-06  |
| 11406 | 275  | 219  | 265  | 181  | 7.00E-08  | 435  | 426  | 0.0002728 |
| 11408 | 310  | 255  | 421  | 190  | 1.30E-28  | 540  | 459  | 7.12E-10  |
| 11439 | 35   | 8    | 33   | 10   | 8.49E-05  | 33   | 5    | 7.26E-08  |
| 11444 | 137  | 86   | 152  | 89   | 3.77E-07  | 251  | 148  | 1.01E-13  |
| 11449 | 116  | 58   | 173  | 75   | 2.41E-13  | 251  | 113  | 4.11E-21  |
| 11453 | 9    | 75   | 6    | 76   | 1.38E-14  | 29   | 108  | 2.06E-08  |
| 11613 | 164  | 450  | 187  | 666  | 1.57E-50  | 405  | 976  | 3.63E-30  |
| 11614 | 41   | 26   | 56   | 9    | 4.41E-11  | 54   | 26   | 3.84E-05  |
| 11630 | 26   | 16   | 17   | 4    | 0.0017123 | 55   | 11   | 1.26E-10  |
| 11631 | 7    | 28   | 13   | 65   | 3.82E-08  | 18   | 66   | 1.43E-05  |

|       |      |      |      |      |           |      |      |           |
|-------|------|------|------|------|-----------|------|------|-----------|
| 11633 | 74   | 51   | 108  | 61   | 6.66E-06  | 135  | 107  | 0.0003601 |
| 11637 | 2701 | 1865 | 2990 | 1788 | 8.34E-109 | 3719 | 2573 | 2.44E-122 |
| 11647 | 291  | 92   | 276  | 34   | 7.64E-56  | 249  | 72   | 8.45E-34  |
| 11648 | 84   | 50   | 105  | 23   | 1.66E-16  | 131  | 69   | 2.06E-09  |
| 11649 | 215  | 124  | 248  | 91   | 5.15E-23  | 310  | 179  | 3.37E-17  |
| 11652 | 6    | 22   | 4    | 18   | 0.0089438 | 3    | 27   | 6.83E-05  |
| 11656 | 116  | 85   | 166  | 113  | 1.85E-05  | 222  | 132  | 4.40E-12  |
| 11659 | 15   | 114  | 13   | 145  | 1.21E-25  | 36   | 265  | 7.68E-34  |
| 11672 | 76   | 56   | 99   | 61   | 0.0001285 | 116  | 81   | 5.29E-05  |
| 11675 | 96   | 85   | 92   | 45   | 1.80E-06  | 142  | 125  | 0.0037568 |
| 11676 | 56   | 106  | 66   | 157  | 2.65E-07  | 120  | 245  | 8.98E-06  |
| 11678 | 56   | 29   | 81   | 14   | 5.67E-15  | 93   | 64   | 0.0002015 |
| 11680 | 8    | 36   | 5    | 62   | 4.31E-12  | 15   | 183  | 3.58E-30  |
| 11687 | 934  | 1690 | 1073 | 1875 | 4.62E-29  | 1815 | 3282 | 1.58E-36  |
| 11692 | 0    | 24   | 0    | 25   | 3.06E-07  | 5    | 64   | 2.21E-11  |
| 11694 | 124  | 61   | 137  | 57   | 1.56E-11  | 138  | 83   | 6.75E-08  |
| 11695 | 37   | 31   | 71   | 41   | 0.0004171 | 84   | 52   | 6.12E-05  |
| 11713 | 29   | 271  | 75   | 409  | 1.70E-47  | 103  | 1454 | 2.26E-243 |
| 11723 | 186  | 89   | 236  | 93   | 3.42E-20  | 244  | 143  | 1.96E-13  |
| 11725 | 12   | 20   | 43   | 16   | 6.34E-05  | 44   | 28   | 0.0059635 |
| 11728 | 49   | 92   | 92   | 153  | 0.0047632 | 145  | 254  | 0.0014694 |
| 11732 | 21   | 14   | 19   | 3    | 0.0001546 | 18   | 5    | 0.001231  |
| 11748 | 152  | 123  | 331  | 148  | 3.30E-23  | 329  | 209  | 6.29E-15  |
| 11753 | 124  | 192  | 258  | 158  | 3.22E-10  | 239  | 235  | 0.008345  |
| 11754 | 9    | 29   | 11   | 43   | 9.51E-05  | 20   | 54   | 0.0031696 |
| 11757 | 11   | 20   | 8    | 44   | 4.12E-06  | 11   | 41   | 0.0006778 |
| 11770 | 96   | 271  | 118  | 478  | 2.77E-42  | 185  | 476  | 7.01E-18  |
| 11785 | 41   | 117  | 39   | 187  | 2.67E-20  | 75   | 233  | 5.43E-13  |
| 11786 | 187  | 363  | 325  | 740  | 1.15E-26  | 464  | 833  | 4.98E-10  |
| 11787 | 227  | 156  | 283  | 224  | 3.35E-05  | 236  | 188  | 3.14E-06  |
| 11796 | 403  | 1022 | 577  | 1723 | 3.20E-100 | 874  | 2140 | 8.15E-67  |
| 11797 | 70   | 25   | 50   | 6    | 3.28E-11  | 75   | 22   | 4.73E-11  |
| 11798 | 15   | 6    | 18   | 0    | 1.07E-06  | 54   | 9    | 1.35E-11  |
| 11799 | 81   | 52   | 133  | 34   | 2.81E-18  | 140  | 67   | 2.10E-11  |
| 11814 | 42   | 15   | 94   | 18   | 3.26E-16  | 68   | 24   | 1.08E-08  |
| 11815 | 2    | 22   | 1    | 20   | 6.94E-05  | 10   | 41   | 0.0003304 |
| 11817 | 31   | 274  | 63   | 471  | 1.01E-66  | 103  | 915  | 4.27E-126 |
| 11819 | 656  | 1135 | 1033 | 2155 | 1.27E-59  | 1617 | 2651 | 1.88E-17  |
| 11821 | 152  | 263  | 296  | 443  | 0.0003937 | 303  | 608  | 1.08E-11  |
| 11823 | 348  | 310  | 418  | 309  | 4.67E-09  | 733  | 620  | 4.25E-13  |
| 11824 | 39   | 95   | 36   | 174  | 4.08E-19  | 104  | 204  | 0.0001847 |
| 11827 | 190  | 163  | 228  | 147  | 4.49E-08  | 323  | 229  | 2.38E-11  |
| 11834 | 101  | 154  | 197  | 316  | 0.0001963 | 274  | 431  | 0.003503  |
| 11836 | 48   | 110  | 69   | 160  | 5.38E-07  | 89   | 224  | 9.62E-09  |
| 11837 | 93   | 70   | 124  | 83   | 0.0001555 | 162  | 123  | 2.74E-05  |
| 11849 | 31   | 48   | 37   | 78   | 0.0019488 | 38   | 92   | 0.0005295 |
| 11853 | 25   | 118  | 45   | 203  | 7.00E-21  | 48   | 199  | 2.61E-16  |
| 11854 | 149  | 132  | 251  | 173  | 2.18E-07  | 396  | 250  | 5.77E-18  |
| 11864 | 87   | 62   | 74   | 28   | 1.37E-07  | 113  | 61   | 6.09E-08  |
| 11868 | 5    | 29   | 1    | 25   | 3.04E-06  | 12   | 47   | 0.0001855 |
| 11874 | 68   | 128  | 85   | 165  | 6.07E-05  | 116  | 224  | 0.0001576 |
| 11887 | 192  | 437  | 307  | 775  | 1.90E-34  | 438  | 897  | 1.22E-17  |
| 11891 | 194  | 151  | 322  | 236  | 1.62E-07  | 389  | 333  | 2.68E-07  |
| 11895 | 372  | 254  | 467  | 374  | 2.43E-07  | 743  | 456  | 1.67E-34  |
| 11896 | 3    | 12   | 0    | 23   | 5.65E-07  | 9    | 33   | 0.0027991 |
| 11897 | 41   | 144  | 38   | 235  | 2.08E-30  | 49   | 194  | 4.10E-15  |
| 11898 | 429  | 1049 | 727  | 2034 | 4.42E-106 | 902  | 1793 | 1.95E-30  |
| 11900 | 17   | 67   | 42   | 104  | 1.33E-05  | 28   | 124  | 2.24E-11  |
| 11902 | 120  | 227  | 138  | 221  | 0.002112  | 176  | 398  | 2.42E-11  |
| 11905 | 6    | 6    | 0    | 8    | 0.008835  | 0    | 17   | 6.95E-05  |
| 11906 | 0    | 22   | 1    | 20   | 6.94E-05  | 2    | 31   | 1.72E-06  |
| 11916 | 0    | 4    | 0    | 13   | 0.0003359 | 2    | 16   | 0.0037918 |
| 11920 | 144  | 209  | 230  | 445  | 4.43E-11  | 409  | 819  | 4.33E-15  |
| 11921 | 102  | 246  | 28   | 194  | 3.81E-27  | 194  | 478  | 2.07E-16  |
| 11923 | 177  | 19   | 293  | 110  | 3.42E-26  | 378  | 74   | 8.43E-67  |
| 11929 | 386  | 235  | 707  | 389  | 1.12E-32  | 1202 | 401  | 3.15E-137 |

|       |      |      |      |      |           |      |      |           |
|-------|------|------|------|------|-----------|------|------|-----------|
| 11930 | 1068 | 2097 | 1382 | 2271 | 1.13E-26  | 2512 | 5118 | 1.21E-91  |
| 11940 | 15   | 62   | 37   | 108  | 2.56E-07  | 35   | 133  | 2.42E-10  |
| 11941 | 1    | 24   | 0    | 12   | 0.0006424 | 0    | 15   | 0.0002525 |
| 11942 | 38   | 215  | 57   | 517  | 8.85E-81  | 92   | 567  | 7.51E-63  |
| 11943 | 174  | 314  | 159  | 533  | 1.06E-37  | 319  | 617  | 1.90E-10  |
| 11944 | 113  | 53   | 75   | 20   | 1.55E-10  | 151  | 39   | 5.69E-23  |
| 11949 | 66   | 31   | 71   | 17   | 6.03E-11  | 144  | 69   | 9.67E-12  |
| 11956 | 77   | 48   | 109  | 13   | 4.11E-23  | 116  | 71   | 1.37E-06  |
| 11957 | 267  | 293  | 359  | 243  | 1.51E-10  | 546  | 480  | 1.19E-08  |
| 11958 | 372  | 615  | 491  | 919  | 4.23E-19  | 612  | 1144 | 8.48E-16  |
| 11959 | 49   | 101  | 42   | 131  | 1.61E-09  | 102  | 207  | 5.76E-05  |
| 11966 | 195  | 204  | 346  | 305  | 0.000834  | 606  | 427  | 2.53E-20  |
| 11967 | 104  | 159  | 165  | 249  | 0.0066704 | 219  | 414  | 7.97E-07  |
| 11970 | 186  | 81   | 241  | 130  | 1.27E-12  | 375  | 174  | 1.22E-29  |
| 11975 | 38   | 90   | 50   | 141  | 9.61E-09  | 112  | 295  | 3.61E-12  |
| 11980 | 454  | 1169 | 325  | 917  | 1.93E-49  | 509  | 1388 | 1.45E-55  |
| 11983 | 36   | 108  | 47   | 175  | 4.36E-15  | 88   | 218  | 2.61E-08  |
| 11989 | 0    | 16   | 0    | 23   | 5.65E-07  | 3    | 50   | 5.85E-10  |
| 11991 | 59   | 168  | 86   | 291  | 1.50E-21  | 118  | 356  | 2.85E-18  |
| 11996 | 39   | 23   | 45   | 18   | 0.0001125 | 61   | 37   | 0.0004825 |
| 12000 | 351  | 351  | 579  | 459  | 3.73E-09  | 937  | 710  | 1.59E-24  |
| 12011 | 50   | 87   | 100  | 195  | 1.10E-05  | 128  | 232  | 0.0008129 |
| 12077 | 156  | 192  | 199  | 86   | 3.77E-15  | 300  | 282  | 0.0005236 |
| 12135 | 19   | 42   | 4    | 32   | 1.22E-05  | 16   | 85   | 2.10E-09  |
| 12142 | 52   | 44   | 40   | 10   | 2.44E-06  | 66   | 28   | 6.07E-07  |
| 12148 | 2    | 26   | 0    | 13   | 0.0003359 | 0    | 39   | 1.41E-10  |
| 12154 | 62   | 560  | 76   | 543  | 1.09E-74  | 139  | 1106 | 4.88E-143 |
| 12157 | 94   | 59   | 100  | 21   | 4.13E-16  | 116  | 54   | 5.04E-10  |
| 12162 | 17   | 356  | 9    | 488  | 8.99E-118 | 33   | 839  | 9.12E-166 |
| 12168 | 124  | 398  | 151  | 688  | 1.03E-67  | 274  | 790  | 7.58E-36  |
| 12169 | 10   | 32   | 9    | 73   | 6.54E-12  | 27   | 70   | 0.0010029 |
| 12180 | 6    | 27   | 4    | 39   | 2.43E-07  | 10   | 58   | 2.60E-07  |
| 12185 | 353  | 269  | 357  | 255  | 7.51E-09  | 529  | 515  | 3.86E-05  |
| 12197 | 77   | 156  | 73   | 160  | 2.65E-06  | 129  | 261  | 6.75E-06  |
| 12200 | 133  | 102  | 133  | 83   | 1.13E-05  | 245  | 204  | 1.45E-05  |
| 12205 | 106  | 49   | 138  | 95   | 0.0001303 | 194  | 89   | 2.82E-16  |
| 12208 | 63   | 48   | 60   | 15   | 3.94E-09  | 115  | 53   | 3.95E-10  |
| 12213 | 20   | 49   | 30   | 63   | 0.0065801 | 43   | 136  | 2.53E-08  |
| 12215 | 79   | 52   | 86   | 33   | 1.80E-08  | 88   | 53   | 1.88E-05  |
| 12217 | 112  | 74   | 102  | 47   | 9.53E-08  | 142  | 103  | 2.00E-05  |
| 12219 | 0    | 10   | 0    | 14   | 0.000176  | 1    | 19   | 0.0001668 |
| 12221 | 158  | 103  | 276  | 83   | 1.30E-31  | 308  | 118  | 1.67E-31  |
| 12227 | 160  | 192  | 317  | 138  | 3.87E-23  | 387  | 295  | 7.83E-11  |
| 12259 | 22   | 2    | 17   | 0    | 2.31E-06  | 17   | 2    | 7.16E-05  |
| 12261 | 11   | 24   | 3    | 52   | 2.36E-11  | 12   | 60   | 1.09E-06  |
| 12268 | 6    | 40   | 15   | 51   | 9.80E-05  | 25   | 107  | 1.12E-09  |
| 12270 | 153  | 112  | 167  | 77   | 7.65E-12  | 286  | 214  | 9.07E-09  |
| 12271 | 82   | 32   | 106  | 28   | 2.04E-14  | 141  | 41   | 1.04E-19  |
| 12272 | 87   | 50   | 70   | 49   | 0.0097917 | 104  | 70   | 4.73E-05  |
| 12275 | 88   | 83   | 77   | 21   | 1.51E-10  | 93   | 60   | 5.79E-05  |
| 12279 | 45   | 113  | 73   | 123  | 0.0097859 | 95   | 268  | 1.18E-12  |
| 12280 | 38   | 13   | 34   | 18   | 0.0078323 | 36   | 9    | 1.31E-06  |
| 12287 | 17   | 4    | 9    | 0    | 0.0010365 | 25   | 9    | 0.000785  |
| 12289 | 2    | 15   | 1    | 21   | 3.72E-05  | 2    | 26   | 2.73E-05  |
| 12292 | 54   | 164  | 53   | 192  | 7.81E-16  | 86   | 355  | 7.42E-28  |
| 12314 | 180  | 164  | 142  | 114  | 0.0047625 | 161  | 118  | 7.54E-06  |
| 12320 | 19   | 15   | 35   | 15   | 0.0009834 | 63   | 30   | 8.12E-06  |
| 12333 | 42   | 13   | 35   | 3    | 4.94E-09  | 27   | 13   | 0.0037975 |
| 12339 | 37   | 32   | 74   | 49   | 0.0027774 | 94   | 53   | 2.51E-06  |
| 12340 | 26   | 24   | 64   | 41   | 0.0032961 | 120  | 58   | 8.01E-10  |
| 12350 | 179  | 136  | 250  | 225  | 0.0087324 | 391  | 301  | 1.38E-10  |
| 12356 | 73   | 259  | 134  | 379  | 1.79E-21  | 237  | 653  | 1.40E-27  |
| 12357 | 17   | 69   | 21   | 83   | 3.07E-08  | 38   | 186  | 5.24E-18  |
| 12363 | 34   | 18   | 59   | 32   | 0.0006845 | 71   | 44   | 0.0002213 |
| 12370 | 54   | 245  | 131  | 363  | 5.98E-20  | 119  | 517  | 4.45E-42  |
| 12371 | 4    | 0    | 10   | 0    | 0.000483  | 15   | 0    | 4.99E-06  |

|       |      |      |      |      |           |      |      |           |
|-------|------|------|------|------|-----------|------|------|-----------|
| 12385 | 124  | 108  | 121  | 53   | 1.10E-09  | 171  | 106  | 6.69E-09  |
| 12390 | 1408 | 2259 | 1626 | 2562 | 3.89E-24  | 3135 | 4237 | 0.001968  |
| 12392 | 34   | 120  | 14   | 94   | 1.78E-13  | 88   | 270  | 1.24E-14  |
| 12399 | 135  | 77   | 177  | 78   | 2.17E-13  | 276  | 109  | 2.09E-27  |
| 12401 | 227  | 170  | 384  | 257  | 1.71E-11  | 655  | 418  | 4.76E-28  |
| 12403 | 25   | 18   | 59   | 24   | 7.71E-06  | 90   | 26   | 3.41E-13  |
| 12418 | 516  | 478  | 619  | 335  | 9.99E-30  | 991  | 684  | 4.72E-34  |
| 12423 | 308  | 128  | 585  | 247  | 2.00E-43  | 617  | 245  | 9.52E-59  |
| 12424 | 60   | 57   | 87   | 63   | 0.0053475 | 94   | 57   | 1.17E-05  |
| 12431 | 228  | 654  | 359  | 1593 | 1.52E-150 | 686  | 1987 | 1.39E-88  |
| 12432 | 36   | 52   | 50   | 122  | 3.63E-06  | 85   | 153  | 0.0074436 |
| 12447 | 516  | 390  | 784  | 480  | 4.00E-28  | 829  | 532  | 1.17E-34  |
| 12448 | 85   | 47   | 109  | 27   | 1.54E-15  | 161  | 81   | 4.92E-12  |
| 12449 | 37   | 12   | 44   | 16   | 4.08E-05  | 87   | 33   | 4.99E-10  |
| 12454 | 54   | 229  | 90   | 345  | 2.90E-29  | 126  | 576  | 2.81E-49  |
| 12467 | 5    | 3    | 15   | 1    | 0.0001393 | 15   | 4    | 0.0041237 |
| 12469 | 44   | 85   | 34   | 108  | 4.27E-08  | 70   | 142  | 0.000879  |
| 12474 | 76   | 102  | 97   | 171  | 0.0007288 | 127  | 220  | 0.0041232 |
| 12476 | 17   | 120  | 23   | 55   | 0.0029237 | 66   | 206  | 9.75E-12  |
| 12479 | 47   | 25   | 37   | 5    | 2.49E-08  | 58   | 42   | 0.0064571 |
| 12487 | 6    | 43   | 6    | 80   | 1.31E-15  | 35   | 115  | 1.46E-07  |
| 12506 | 67   | 77   | 78   | 41   | 4.35E-05  | 125  | 111  | 0.0086456 |
| 12514 | 63   | 50   | 83   | 28   | 2.47E-09  | 160  | 102  | 6.79E-08  |
| 12528 | 279  | 251  | 349  | 301  | 0.0003396 | 488  | 340  | 3.79E-17  |
| 12534 | 35   | 14   | 42   | 11   | 1.42E-06  | 73   | 35   | 1.39E-06  |
| 12545 | 81   | 167  | 93   | 189  | 3.85E-06  | 133  | 321  | 6.92E-11  |
| 12547 | 45   | 41   | 62   | 21   | 2.30E-07  | 49   | 31   | 0.0031784 |
| 12574 | 136  | 42   | 177  | 27   | 4.33E-33  | 256  | 81   | 5.22E-32  |
| 12575 | 11   | 13   | 28   | 10   | 0.0009309 | 15   | 5    | 0.006525  |
| 12577 | 352  | 189  | 430  | 125  | 6.89E-50  | 672  | 302  | 2.60E-54  |
| 12582 | 128  | 85   | 148  | 88   | 8.12E-07  | 300  | 185  | 1.24E-14  |
| 12588 | 78   | 191  | 67   | 158  | 3.05E-07  | 83   | 278  | 4.41E-17  |
| 12594 | 60   | 34   | 103  | 35   | 2.79E-11  | 82   | 38   | 1.58E-07  |
| 12601 | 3509 | 2327 | 4367 | 2003 | 9.25E-274 | 4850 | 3454 | 5.04E-146 |
| 12612 | 0    | 9    | 0    | 11   | 0.0012317 | 0    | 14   | 0.000485  |
| 12613 | 6    | 33   | 6    | 35   | 2.54E-05  | 19   | 60   | 0.0002468 |
| 12618 | 116  | 37   | 100  | 61   | 9.68E-05  | 195  | 74   | 1.02E-20  |
| 12629 | 3    | 22   | 2    | 15   | 0.0056043 | 10   | 41   | 0.0003304 |
| 12630 | 32   | 84   | 48   | 91   | 0.0048595 | 72   | 140  | 0.002316  |
| 12633 | 556  | 179  | 503  | 128  | 3.33E-65  | 768  | 242  | 1.76E-93  |
| 12640 | 1    | 18   | 0    | 25   | 3.06E-07  | 8    | 40   | 6.51E-05  |
| 12645 | 16   | 13   | 28   | 9    | 0.0004144 | 41   | 19   | 0.0002202 |
| 12654 | 32   | 14   | 31   | 8    | 3.52E-05  | 85   | 35   | 5.61E-09  |
| 12657 | 126  | 125  | 125  | 65   | 1.20E-07  | 132  | 106  | 0.0006617 |
| 12658 | 147  | 58   | 141  | 10   | 4.69E-35  | 170  | 51   | 6.89E-23  |
| 12670 | 306  | 258  | 412  | 117  | 7.83E-49  | 464  | 327  | 6.98E-16  |
| 12673 | 7    | 65   | 0    | 46   | 3.23E-13  | 19   | 227  | 6.72E-37  |
| 12681 | 134  | 110  | 127  | 30   | 1.68E-18  | 200  | 149  | 1.43E-06  |
| 12697 | 213  | 104  | 251  | 106  | 1.72E-19  | 294  | 140  | 1.14E-22  |
| 12700 | 65   | 55   | 116  | 80   | 0.0004346 | 131  | 104  | 0.0004814 |
| 12703 | 189  | 684  | 370  | 1238 | 2.80E-85  | 528  | 2106 | 4.47E-151 |
| 12709 | 121  | 115  | 181  | 148  | 0.0023433 | 285  | 232  | 1.02E-06  |
| 12720 | 176  | 138  | 236  | 146  | 2.89E-09  | 297  | 230  | 3.66E-08  |
| 12723 | 99   | 503  | 147  | 878  | 8.61E-107 | 208  | 1249 | 1.08E-133 |
| 12726 | 88   | 98   | 150  | 105  | 9.50E-05  | 216  | 185  | 0.0001295 |
| 12728 | 5    | 16   | 0    | 22   | 1.06E-06  | 6    | 32   | 0.0002562 |
| 12733 | 111  | 171  | 162  | 383  | 1.07E-15  | 264  | 408  | 0.009235  |
| 12736 | 2    | 667  | 9    | 854  | 1.60E-215 | 64   | 1497 | 3.76E-289 |
| 12744 | 47   | 176  | 112  | 358  | 2.63E-24  | 104  | 404  | 2.01E-29  |
| 12763 | 39   | 117  | 60   | 199  | 9.27E-15  | 73   | 226  | 1.39E-12  |
| 12766 | 27   | 134  | 58   | 224  | 1.34E-19  | 84   | 225  | 6.24E-10  |
| 12767 | 43   | 62   | 51   | 99   | 0.002349  | 99   | 228  | 2.54E-07  |
| 12772 | 275  | 288  | 529  | 503  | 0.0027372 | 739  | 592  | 3.01E-16  |
| 12779 | 110  | 134  | 182  | 141  | 0.0005255 | 256  | 196  | 1.68E-07  |
| 12781 | 60   | 32   | 108  | 52   | 1.17E-07  | 117  | 63   | 2.86E-08  |
| 12784 | 122  | 191  | 160  | 342  | 2.57E-11  | 300  | 473  | 0.002075  |

|       |     |      |      |      |           |      |      |           |
|-------|-----|------|------|------|-----------|------|------|-----------|
| 12790 | 142 | 89   | 216  | 105  | 1.05E-13  | 300  | 163  | 1.09E-18  |
| 12798 | 155 | 155  | 264  | 178  | 3.56E-08  | 373  | 257  | 7.84E-14  |
| 12799 | 12  | 100  | 19   | 212  | 3.72E-37  | 44   | 293  | 5.99E-35  |
| 12802 | 0   | 36   | 3    | 39   | 5.23E-08  | 5    | 43   | 5.67E-07  |
| 12808 | 761 | 437  | 895  | 608  | 1.06E-23  | 979  | 484  | 1.05E-67  |
| 12814 | 462 | 1310 | 613  | 1641 | 1.87E-79  | 1051 | 2953 | 1.89E-123 |
| 12821 | 62  | 33   | 119  | 46   | 3.76E-11  | 142  | 86   | 7.07E-08  |
| 12830 | 30  | 18   | 35   | 17   | 0.0032217 | 39   | 23   | 0.0045173 |
| 12831 | 188 | 131  | 259  | 117  | 4.12E-18  | 248  | 184  | 5.06E-08  |
| 12838 | 119 | 227  | 141  | 405  | 2.08E-23  | 255  | 512  | 4.43E-10  |
| 12851 | 1   | 13   | 1    | 38   | 9.47E-10  | 14   | 49   | 0.0003286 |
| 12853 | 30  | 24   | 65   | 26   | 2.40E-06  | 55   | 35   | 0.0019202 |
| 12858 | 84  | 40   | 142  | 65   | 1.97E-10  | 144  | 85   | 2.36E-08  |
| 12859 | 189 | 340  | 349  | 535  | 2.11E-05  | 490  | 800  | 4.22E-06  |
| 12860 | 42  | 95   | 37   | 189  | 1.54E-21  | 99   | 252  | 6.51E-10  |
| 12876 | 61  | 139  | 60   | 195  | 4.39E-14  | 101  | 198  | 0.000235  |
| 12886 | 15  | 31   | 18   | 67   | 1.77E-06  | 23   | 72   | 7.02E-05  |
| 12888 | 59  | 13   | 80   | 24   | 3.46E-10  | 88   | 23   | 6.95E-14  |
| 12891 | 24  | 40   | 28   | 86   | 1.84E-06  | 44   | 116  | 1.47E-05  |
| 12892 | 760 | 740  | 1080 | 1044 | 9.00E-05  | 1614 | 1171 | 4.22E-47  |
| 12898 | 190 | 758  | 382  | 1125 | 1.20E-64  | 559  | 1828 | 3.22E-100 |
| 12901 | 35  | 151  | 24   | 191  | 6.31E-29  | 67   | 320  | 3.48E-29  |
| 12906 | 35  | 58   | 18   | 133  | 1.07E-19  | 78   | 171  | 3.12E-05  |
| 12910 | 39  | 174  | 51   | 327  | 1.09E-42  | 114  | 382  | 5.24E-23  |
| 12911 | 97  | 205  | 118  | 370  | 1.88E-24  | 161  | 442  | 5.16E-19  |
| 12912 | 18  | 62   | 54   | 124  | 1.14E-05  | 53   | 120  | 0.0002976 |
| 12920 | 494 | 1358 | 717  | 2089 | 1.91E-116 | 1141 | 2741 | 3.40E-81  |
| 12925 | 56  | 194  | 54   | 252  | 3.24E-26  | 82   | 344  | 1.42E-27  |
| 12926 | 174 | 134  | 240  | 98   | 1.26E-19  | 409  | 248  | 3.29E-20  |
| 12931 | 74  | 57   | 87   | 47   | 2.67E-05  | 149  | 91   | 3.63E-08  |
| 12934 | 305 | 277  | 449  | 374  | 5.35E-06  | 774  | 587  | 1.86E-20  |
| 12938 | 119 | 33   | 101  | 38   | 6.60E-10  | 183  | 49   | 8.81E-27  |
| 12955 | 14  | 21   | 3    | 32   | 1.66E-06  | 23   | 57   | 0.0048071 |
| 12964 | 112 | 70   | 145  | 77   | 2.45E-08  | 194  | 91   | 1.02E-15  |
| 12965 | 77  | 66   | 109  | 45   | 1.83E-09  | 154  | 100  | 2.47E-07  |
| 12968 | 3   | 17   | 2    | 14   | 0.0055232 | 1    | 39   | 4.03E-09  |
| 12998 | 122 | 71   | 95   | 34   | 7.59E-10  | 162  | 59   | 3.03E-18  |
| 12999 | 282 | 218  | 357  | 153  | 1.43E-26  | 465  | 358  | 2.93E-12  |
| 13001 | 15  | 7    | 23   | 6    | 0.0005356 | 32   | 9    | 1.29E-05  |
| 13002 | 180 | 149  | 213  | 133  | 3.09E-08  | 321  | 241  | 1.35E-09  |
| 13010 | 308 | 166  | 361  | 185  | 4.97E-20  | 489  | 296  | 5.78E-24  |
| 13031 | 571 | 261  | 683  | 199  | 4.58E-78  | 862  | 355  | 8.77E-78  |
| 13037 | 215 | 179  | 149  | 66   | 2.45E-11  | 238  | 136  | 7.33E-14  |
| 13039 | 85  | 66   | 102  | 43   | 8.66E-09  | 180  | 102  | 5.60E-11  |
| 13045 | 123 | 71   | 155  | 78   | 9.95E-10  | 307  | 110  | 1.05E-33  |
| 13052 | 101 | 30   | 110  | 25   | 1.01E-16  | 90   | 54   | 1.54E-05  |
| 13053 | 29  | 12   | 55   | 4    | 2.72E-14  | 27   | 13   | 0.0037975 |
| 13058 | 107 | 69   | 109  | 51   | 4.69E-08  | 161  | 105  | 1.25E-07  |
| 13059 | 234 | 119  | 332  | 33   | 9.84E-73  | 400  | 157  | 3.25E-39  |
| 13060 | 117 | 54   | 93   | 24   | 4.89E-13  | 113  | 74   | 1.20E-05  |
| 13061 | 87  | 48   | 74   | 21   | 6.77E-10  | 87   | 45   | 6.72E-07  |
| 13068 | 95  | 297  | 164  | 350  | 1.35E-11  | 177  | 517  | 1.19E-24  |
| 13076 | 74  | 74   | 125  | 72   | 2.81E-06  | 206  | 157  | 2.31E-06  |
| 13079 | 141 | 278  | 156  | 290  | 7.26E-07  | 177  | 446  | 4.06E-16  |
| 13084 | 131 | 66   | 137  | 55   | 4.29E-12  | 181  | 72   | 3.21E-18  |
| 13086 | 43  | 25   | 43   | 1    | 1.32E-13  | 43   | 28   | 0.0081196 |
| 13095 | 218 | 165  | 173  | 97   | 1.01E-08  | 303  | 235  | 2.45E-08  |
| 13096 | 399 | 194  | 490  | 96   | 5.08E-77  | 690  | 358  | 1.64E-44  |
| 13106 | 46  | 56   | 8    | 39   | 2.80E-05  | 40   | 83   | 0.0084069 |
| 13112 | 160 | 600  | 235  | 341  | 0.0057973 | 184  | 673  | 1.91E-44  |
| 13129 | 44  | 7    | 35   | 9    | 1.17E-05  | 49   | 13   | 4.49E-08  |
| 13136 | 37  | 45   | 66   | 38   | 0.0007518 | 64   | 41   | 0.0007637 |
| 13140 | 182 | 340  | 151  | 347  | 1.52E-13  | 328  | 507  | 0.0034193 |
| 13141 | 257 | 245  | 285  | 124  | 6.02E-21  | 398  | 371  | 3.98E-05  |
| 13150 | 79  | 122  | 25   | 80   | 1.85E-06  | 113  | 207  | 0.001304  |
| 13154 | 570 | 483  | 515  | 312  | 1.72E-19  | 685  | 559  | 3.19E-14  |

|       |     |      |     |      |           |      |      |           |
|-------|-----|------|-----|------|-----------|------|------|-----------|
| 13161 | 282 | 102  | 476 | 148  | 1.26E-51  | 584  | 144  | 1.31E-87  |
| 13163 | 91  | 22   | 118 | 25   | 1.32E-18  | 188  | 39   | 6.80E-33  |
| 13167 | 19  | 13   | 14  | 3    | 0.0031871 | 33   | 14   | 0.000568  |
| 13173 | 41  | 6    | 20  | 6    | 0.002507  | 39   | 9    | 2.27E-07  |
| 13175 | 149 | 70   | 107 | 21   | 8.62E-18  | 182  | 116  | 8.10E-09  |
| 13180 | 46  | 7    | 49  | 6    | 6.15E-11  | 48   | 20   | 1.39E-05  |
| 13189 | 209 | 472  | 319 | 563  | 4.59E-10  | 448  | 1468 | 4.45E-81  |
| 13190 | 162 | 224  | 183 | 129  | 2.46E-05  | 316  | 310  | 0.0022072 |
| 13207 | 116 | 131  | 111 | 79   | 0.001317  | 159  | 142  | 0.0036507 |
| 13212 | 29  | 29   | 25  | 3    | 3.43E-06  | 64   | 35   | 6.44E-05  |
| 13219 | 109 | 85   | 162 | 78   | 8.27E-11  | 207  | 112  | 1.72E-13  |
| 13232 | 189 | 186  | 188 | 148  | 0.0006774 | 266  | 191  | 3.17E-09  |
| 13236 | 162 | 64   | 161 | 25   | 6.17E-30  | 148  | 62   | 2.74E-14  |
| 13239 | 58  | 247  | 40  | 187  | 6.74E-20  | 114  | 506  | 3.48E-42  |
| 13252 | 72  | 235  | 85  | 331  | 1.40E-28  | 146  | 351  | 9.06E-12  |
| 13257 | 210 | 124  | 271 | 137  | 8.87E-16  | 452  | 235  | 1.15E-29  |
| 13269 | 26  | 60   | 59  | 104  | 0.0075918 | 59   | 114  | 0.0072624 |
| 13275 | 285 | 198  | 441 | 206  | 2.26E-28  | 507  | 292  | 1.97E-27  |
| 13279 | 13  | 33   | 27  | 75   | 3.85E-05  | 27   | 65   | 0.0043562 |
| 13508 | 185 | 130  | 153 | 95   | 2.12E-06  | 326  | 160  | 6.51E-24  |
| 13511 | 49  | 95   | 59  | 203  | 9.79E-16  | 138  | 299  | 5.97E-08  |
| 13513 | 76  | 65   | 95  | 52   | 1.41E-05  | 150  | 124  | 0.0006349 |
| 13516 | 394 | 291  | 450 | 234  | 6.36E-24  | 636  | 425  | 2.24E-24  |
| 13534 | 199 | 130  | 212 | 168  | 0.0003761 | 280  | 195  | 1.88E-10  |
| 13542 | 100 | 37   | 109 | 29   | 7.54E-15  | 166  | 65   | 3.40E-17  |
| 13543 | 138 | 365  | 193 | 582  | 2.16E-35  | 264  | 690  | 4.35E-26  |
| 13544 | 8   | 32   | 10  | 39   | 0.0002526 | 6    | 55   | 6.72E-09  |
| 13545 | 13  | 90   | 10  | 61   | 1.24E-08  | 43   | 132  | 7.13E-08  |
| 13550 | 297 | 681  | 352 | 981  | 1.08E-51  | 688  | 1450 | 2.53E-30  |
| 13551 | 60  | 193  | 103 | 333  | 4.97E-23  | 159  | 419  | 1.15E-16  |
| 13742 | 57  | 205  | 68  | 354  | 8.14E-40  | 143  | 592  | 1.28E-45  |
| 13744 | 18  | 137  | 45  | 218  | 1.13E-23  | 70   | 466  | 1.00E-54  |
| 13747 | 338 | 164  | 594 | 428  | 1.74E-13  | 919  | 343  | 2.94E-93  |
| 13748 | 8   | 1    | 27  | 2    | 1.50E-07  | 9    | 0    | 0.0006594 |
| 13749 | 42  | 20   | 117 | 62   | 5.74E-07  | 137  | 52   | 5.38E-15  |
| 13760 | 15  | 15   | 30  | 4    | 7.26E-07  | 35   | 15   | 0.0002996 |
| 13761 | 30  | 15   | 43  | 4    | 9.32E-11  | 57   | 42   | 0.0084701 |
| 13764 | 87  | 258  | 102 | 228  | 7.40E-09  | 183  | 427  | 5.09E-13  |
| 13775 | 1   | 17   | 0   | 18   | 1.35E-05  | 4    | 75   | 7.18E-15  |
| 13776 | 7   | 14   | 0   | 17   | 2.56E-05  | 5    | 49   | 2.54E-08  |
| 13778 | 123 | 1095 | 159 | 1126 | 1.27E-152 | 273  | 3405 | 0         |
| 13779 | 4   | 33   | 0   | 11   | 0.0012317 | 8    | 48   | 2.41E-06  |
| 13789 | 625 | 418  | 624 | 252  | 3.68E-49  | 915  | 572  | 1.92E-40  |
| 13796 | 197 | 227  | 366 | 260  | 3.30E-09  | 402  | 391  | 0.0003454 |
| 13800 | 163 | 75   | 120 | 51   | 6.85E-10  | 170  | 106  | 9.17E-09  |
| 13804 | 81  | 21   | 64  | 9    | 3.40E-13  | 97   | 27   | 2.23E-14  |
| 13805 | 48  | 13   | 66  | 8    | 1.93E-14  | 39   | 16   | 0.0001022 |
| 13815 | 40  | 12   | 57  | 14   | 7.01E-09  | 61   | 23   | 2.14E-07  |
| 13825 | 206 | 129  | 207 | 118  | 6.80E-10  | 181  | 100  | 1.47E-11  |
| 13831 | 12  | 6    | 25  | 2    | 5.93E-07  | 22   | 6    | 0.0003801 |
| 13833 | 448 | 418  | 503 | 215  | 6.53E-37  | 699  | 517  | 3.57E-20  |
| 13835 | 95  | 49   | 91  | 26   | 9.68E-12  | 141  | 68   | 1.77E-11  |
| 13881 | 16  | 64   | 26  | 88   | 2.36E-07  | 48   | 154  | 1.61E-09  |
| 13886 | 51  | 27   | 42  | 23   | 0.0040321 | 85   | 69   | 0.0073194 |
| 13887 | 56  | 174  | 41  | 147  | 2.26E-12  | 72   | 211  | 6.16E-11  |
| 13889 | 4   | 12   | 8   | 36   | 0.000113  | 11   | 34   | 0.0068074 |
| 13894 | 176 | 298  | 237 | 380  | 4.45E-05  | 305  | 652  | 4.17E-15  |
| 13895 | 37  | 10   | 47  | 15   | 4.59E-06  | 41   | 10   | 2.38E-07  |
| 13901 | 88  | 63   | 117 | 59   | 1.32E-07  | 135  | 83   | 2.41E-07  |
| 13908 | 829 | 301  | 702 | 169  | 9.76E-95  | 1270 | 453  | 5.57E-135 |
| 13916 | 102 | 79   | 40  | 14   | 5.37E-05  | 114  | 68   | 9.46E-07  |
| 13917 | 19  | 241  | 31  | 199  | 1.13E-26  | 47   | 707  | 8.89E-122 |
| 13921 | 36  | 17   | 65  | 1    | 9.97E-21  | 68   | 14   | 8.06E-13  |
| 13927 | 7   | 2    | 26  | 11   | 0.0046084 | 24   | 8    | 0.0005488 |
| 13929 | 30  | 13   | 53  | 13   | 3.33E-08  | 52   | 18   | 4.29E-07  |
| 13930 | 40  | 171  | 85  | 279  | 5.55E-20  | 82   | 200  | 2.04E-07  |

|       |      |      |      |      |           |      |      |           |
|-------|------|------|------|------|-----------|------|------|-----------|
| 13931 | 2    | 21   | 0    | 36   | 2.04E-10  | 11   | 52   | 1.01E-05  |
| 13936 | 129  | 405  | 245  | 571  | 5.70E-22  | 366  | 773  | 4.82E-17  |
| 13937 | 31   | 12   | 13   | 0    | 4.89E-05  | 25   | 5    | 2.01E-05  |
| 13943 | 18   | 22   | 26   | 9    | 0.0010896 | 25   | 13   | 0.008713  |
| 13961 | 24   | 9    | 29   | 7    | 3.72E-05  | 38   | 6    | 1.30E-08  |
| 13964 | 6    | 98   | 0    | 148  | 5.01E-41  | 13   | 202  | 3.25E-36  |
| 13967 | 48   | 146  | 64   | 316  | 3.64E-34  | 154  | 357  | 5.98E-11  |
| 13968 | 182  | 104  | 215  | 77   | 1.06E-20  | 183  | 125  | 1.11E-07  |
| 13971 | 11   | 3    | 32   | 9    | 5.56E-05  | 14   | 1    | 9.91E-05  |
| 13972 | 9    | 14   | 7    | 43   | 1.39E-06  | 9    | 31   | 0.0061603 |
| 13973 | 8    | 59   | 27   | 61   | 0.0026767 | 38   | 80   | 0.0092002 |
| 13976 | 20   | 26   | 36   | 6    | 1.93E-07  | 40   | 21   | 0.0011034 |
| 13987 | 173  | 153  | 251  | 100  | 5.28E-21  | 240  | 200  | 1.84E-05  |
| 13989 | 96   | 55   | 89   | 41   | 5.96E-07  | 135  | 96   | 2.00E-05  |
| 13997 | 49   | 37   | 51   | 11   | 1.05E-08  | 54   | 37   | 0.004285  |
| 13998 | 119  | 95   | 224  | 161  | 6.36E-06  | 225  | 179  | 4.81E-06  |
| 13999 | 156  | 1008 | 206  | 1501 | 3.14E-206 | 333  | 2093 | 1.23E-230 |
| 14001 | 18   | 174  | 30   | 207  | 9.31E-29  | 63   | 561  | 4.49E-78  |
| 14012 | 125  | 48   | 164  | 68   | 1.56E-13  | 245  | 97   | 2.65E-24  |
| 14031 | 53   | 168  | 31   | 83   | 2.93E-05  | 61   | 245  | 4.01E-19  |
| 14042 | 125  | 73   | 217  | 34   | 1.41E-39  | 218  | 110  | 1.01E-15  |
| 14051 | 1385 | 1889 | 1738 | 1179 | 9.49E-45  | 2005 | 2133 | 9.38E-08  |
| 14053 | 125  | 156  | 219  | 107  | 1.06E-13  | 291  | 274  | 0.0006916 |
| 14054 | 30   | 36   | 17   | 43   | 0.0043235 | 30   | 80   | 0.0003388 |
| 14061 | 73   | 39   | 87   | 42   | 2.18E-06  | 132  | 60   | 9.87E-12  |
| 14064 | 103  | 73   | 75   | 28   | 8.86E-08  | 148  | 95   | 2.66E-07  |
| 14069 | 30   | 15   | 34   | 1    | 1.02E-10  | 38   | 15   | 7.55E-05  |
| 14074 | 196  | 367  | 244  | 437  | 1.46E-08  | 333  | 657  | 8.04E-12  |
| 14081 | 48   | 121  | 61   | 198  | 2.62E-14  | 100  | 254  | 5.61E-10  |
| 14084 | 24   | 19   | 21   | 4    | 0.0001705 | 14   | 3    | 0.002247  |
| 14093 | 26   | 39   | 53   | 28   | 0.0007581 | 88   | 69   | 0.003704  |
| 14101 | 13   | 13   | 31   | 12   | 0.0010717 | 41   | 20   | 0.0004134 |
| 14112 | 88   | 405  | 126  | 603  | 4.70E-62  | 230  | 1090 | 3.59E-95  |
| 14128 | 145  | 220  | 123  | 268  | 1.25E-09  | 247  | 411  | 0.000471  |
| 14141 | 100  | 233  | 153  | 236  | 0.0043735 | 249  | 402  | 0.0018167 |
| 14155 | 1    | 13   | 0    | 21   | 2.01E-06  | 3    | 21   | 0.0014999 |
| 14166 | 131  | 380  | 281  | 602  | 5.40E-19  | 376  | 843  | 7.76E-22  |
| 14172 | 75   | 365  | 97   | 496  | 2.21E-54  | 183  | 1009 | 3.39E-101 |
| 14173 | 51   | 63   | 109  | 34   | 7.33E-13  | 140  | 114  | 0.0006236 |
| 14174 | 9    | 4    | 21   | 3    | 4.41E-05  | 22   | 9    | 0.0033747 |
| 14185 | 5    | 38   | 11   | 47   | 1.61E-05  | 1    | 177  | 1.07E-43  |
| 14186 | 158  | 124  | 196  | 113  | 3.16E-09  | 177  | 149  | 0.000346  |
| 14188 | 403  | 1539 | 394  | 857  | 1.92E-27  | 786  | 3383 | 9.24E-264 |
| 14191 | 20   | 20   | 32   | 6    | 2.12E-06  | 46   | 24   | 0.0004086 |
| 14208 | 67   | 422  | 71   | 514  | 2.41E-71  | 139  | 763  | 1.58E-76  |
| 14221 | 23   | 115  | 27   | 100  | 3.68E-09  | 62   | 257  | 1.02E-20  |
| 14226 | 37   | 96   | 36   | 241  | 9.52E-33  | 90   | 196  | 9.75E-06  |
| 14228 | 36   | 253  | 65   | 376  | 1.41E-45  | 123  | 547  | 1.38E-45  |
| 14236 | 232  | 16   | 220  | 18   | 7.70E-52  | 371  | 20   | 1.13E-103 |
| 14240 | 24   | 7    | 17   | 2    | 0.0002408 | 25   | 11   | 0.0036901 |
| 14241 | 228  | 158  | 266  | 107  | 5.27E-22  | 273  | 139  | 4.52E-19  |
| 14243 | 2    | 14   | 0    | 34   | 7.57E-10  | 3    | 23   | 0.0005376 |
| 14249 | 6    | 34   | 6    | 34   | 4.20E-05  | 3    | 41   | 5.63E-08  |
| 14253 | 183  | 683  | 266  | 625  | 2.63E-24  | 389  | 1391 | 3.34E-87  |
| 14262 | 249  | 1248 | 300  | 1022 | 2.25E-72  | 449  | 2790 | 3.44E-304 |
| 14265 | 16   | 76   | 14   | 94   | 1.78E-13  | 42   | 183  | 8.32E-16  |
| 14275 | 82   | 145  | 95   | 228  | 4.03E-10  | 183  | 319  | 0.0003791 |
| 14276 | 156  | 285  | 228  | 350  | 0.0006171 | 220  | 445  | 4.12E-09  |
| 14277 | 106  | 292  | 137  | 473  | 5.02E-35  | 202  | 533  | 6.88E-21  |
| 14278 | 20   | 7    | 42   | 0    | 1.18E-14  | 47   | 9    | 2.05E-09  |
| 14279 | 26   | 10   | 55   | 16   | 1.39E-07  | 52   | 22   | 9.67E-06  |
| 14518 | 47   | 272  | 111  | 548  | 3.28E-58  | 164  | 784  | 1.45E-69  |
| 14521 | 124  | 110  | 185  | 122  | 1.81E-06  | 220  | 155  | 2.93E-08  |
| 14526 | 43   | 19   | 113  | 32   | 1.71E-14  | 123  | 41   | 1.80E-15  |
| 14533 | 124  | 125  | 155  | 110  | 0.0001262 | 222  | 196  | 0.0003191 |
| 14536 | 12   | 66   | 34   | 186  | 1.90E-22  | 60   | 218  | 3.41E-15  |

|       |     |      |      |      |           |      |      |           |
|-------|-----|------|------|------|-----------|------|------|-----------|
| 14537 | 354 | 212  | 552  | 406  | 8.79E-12  | 877  | 336  | 1.76E-86  |
| 14558 | 39  | 15   | 61   | 11   | 3.68E-11  | 73   | 30   | 7.40E-08  |
| 14575 | 231 | 181  | 278  | 213  | 1.07E-05  | 450  | 267  | 4.74E-23  |
| 14577 | 6   | 3    | 19   | 0    | 5.01E-07  | 20   | 4    | 0.0001179 |
| 14578 | 477 | 534  | 530  | 433  | 1.87E-07  | 715  | 596  | 1.19E-13  |
| 14596 | 129 | 78   | 205  | 93   | 1.64E-14  | 265  | 144  | 1.24E-16  |
| 14597 | 31  | 69   | 43   | 107  | 8.31E-06  | 69   | 174  | 3.89E-07  |
| 14600 | 11  | 26   | 20   | 49   | 0.0035449 | 15   | 52   | 0.0002931 |
| 14603 | 243 | 395  | 326  | 510  | 1.03E-05  | 523  | 772  | 0.004329  |
| 14604 | 231 | 129  | 308  | 182  | 5.48E-13  | 365  | 232  | 1.84E-16  |
| 14605 | 105 | 167  | 151  | 107  | 0.0001337 | 209  | 181  | 0.0002853 |
| 14608 | 70  | 43   | 41   | 14   | 3.37E-05  | 88   | 72   | 0.0068024 |
| 14610 | 429 | 1037 | 558  | 1772 | 7.35E-113 | 852  | 2099 | 1.58E-66  |
| 14613 | 153 | 138  | 175  | 98   | 8.42E-09  | 239  | 159  | 3.94E-10  |
| 14633 | 61  | 66   | 73   | 32   | 2.94E-06  | 160  | 90   | 4.26E-10  |
| 14634 | 60  | 37   | 93   | 32   | 3.87E-10  | 106  | 64   | 2.89E-06  |
| 14637 | 484 | 329  | 482  | 161  | 2.44E-48  | 820  | 568  | 3.04E-28  |
| 14642 | 236 | 561  | 380  | 702  | 2.52E-14  | 523  | 971  | 2.65E-13  |
| 14651 | 238 | 808  | 360  | 942  | 1.97E-44  | 563  | 2047 | 1.52E-130 |
| 14662 | 32  | 12   | 105  | 36   | 2.47E-11  | 112  | 78   | 5.47E-05  |
| 14663 | 50  | 19   | 49   | 21   | 9.89E-05  | 50   | 16   | 3.02E-07  |
| 14665 | 82  | 279  | 101  | 335  | 6.28E-24  | 98   | 317  | 2.50E-18  |
| 14667 | 53  | 53   | 59   | 22   | 1.94E-06  | 127  | 85   | 6.03E-06  |
| 14669 | 0   | 20   | 0    | 40   | 1.52E-11  | 5    | 32   | 9.17E-05  |
| 14673 | 0   | 9    | 0    | 23   | 5.65E-07  | 0    | 15   | 0.0002525 |
| 14675 | 465 | 2154 | 695  | 2157 | 2.27E-132 | 1053 | 3406 | 6.35E-182 |
| 14678 | 38  | 9    | 31   | 16   | 0.0083578 | 52   | 8    | 2.14E-11  |
| 14679 | 66  | 159  | 168  | 355  | 1.98E-11  | 175  | 293  | 0.0024808 |
| 14686 | 433 | 232  | 397  | 82   | 1.19E-60  | 373  | 213  | 6.12E-21  |
| 14687 | 236 | 177  | 289  | 139  | 3.28E-18  | 422  | 212  | 2.06E-29  |
| 14692 | 160 | 96   | 183  | 61   | 2.69E-19  | 248  | 139  | 7.45E-15  |
| 14696 | 461 | 326  | 594  | 298  | 3.22E-33  | 996  | 538  | 3.66E-59  |
| 14718 | 833 | 1515 | 1107 | 1661 | 2.89E-12  | 1493 | 2864 | 1.64E-41  |
| 14722 | 5   | 35   | 7    | 82   | 2.22E-15  | 7    | 64   | 3.84E-10  |
| 14734 | 1   | 27   | 13   | 47   | 8.03E-05  | 3    | 43   | 3.37E-08  |
| 14736 | 3   | 24   | 3    | 55   | 4.01E-12  | 5    | 126  | 8.17E-26  |
| 14739 | 48  | 158  | 44   | 151  | 5.68E-12  | 60   | 297  | 3.05E-28  |
| 14758 | 31  | 11   | 12   | 1    | 0.0010641 | 34   | 3    | 1.77E-09  |
| 14760 | 48  | 110  | 67   | 186  | 7.14E-11  | 95   | 179  | 0.0012478 |
| 14767 | 6   | 41   | 8    | 62   | 3.84E-10  | 25   | 116  | 3.77E-11  |
| 14774 | 109 | 548  | 166  | 801  | 1.67E-82  | 319  | 1127 | 7.92E-70  |
| 14775 | 203 | 191  | 290  | 213  | 8.02E-07  | 493  | 365  | 1.30E-14  |
| 14783 | 5   | 38   | 1    | 39   | 5.12E-10  | 8    | 63   | 2.37E-09  |
| 14789 | 48  | 224  | 102  | 284  | 4.68E-16  | 144  | 408  | 9.65E-19  |
| 14794 | 136 | 123  | 181  | 153  | 0.0060311 | 322  | 253  | 2.08E-08  |
| 14799 | 12  | 37   | 27   | 75   | 3.85E-05  | 13   | 82   | 2.63E-10  |
| 14804 | 54  | 59   | 91   | 63   | 0.0020779 | 90   | 71   | 0.0032913 |
| 14806 | 113 | 59   | 252  | 100  | 3.51E-21  | 343  | 190  | 1.71E-20  |
| 14810 | 11  | 19   | 5    | 20   | 0.0082813 | 9    | 34   | 0.0018739 |
| 14819 | 341 | 283  | 507  | 158  | 1.12E-54  | 757  | 448  | 5.90E-38  |
| 14822 | 5   | 11   | 5    | 36   | 4.79E-06  | 6    | 49   | 1.56E-07  |
| 14823 | 283 | 476  | 447  | 728  | 3.83E-09  | 511  | 894  | 1.67E-09  |
| 14829 | 38  | 118  | 83   | 161  | 8.39E-05  | 84   | 157  | 0.0034422 |
| 14833 | 2   | 59   | 9    | 103  | 6.78E-19  | 6    | 288  | 4.49E-64  |
| 14843 | 117 | 52   | 155  | 81   | 4.31E-09  | 267  | 111  | 7.66E-25  |
| 14844 | 24  | 8    | 62   | 0    | 2.76E-21  | 60   | 21   | 6.77E-08  |
| 14850 | 19  | 1    | 13   | 0    | 4.89E-05  | 22   | 1    | 2.22E-07  |
| 14854 | 23  | 3    | 59   | 14   | 2.36E-09  | 50   | 10   | 6.62E-10  |
| 14870 | 144 | 274  | 218  | 412  | 1.37E-09  | 353  | 632  | 6.73E-08  |
| 14928 | 68  | 25   | 113  | 76   | 0.0003305 | 74   | 36   | 1.73E-06  |
| 14929 | 62  | 40   | 68   | 45   | 0.0044926 | 106  | 49   | 1.85E-09  |
| 14931 | 216 | 173  | 201  | 147  | 3.31E-05  | 500  | 275  | 1.47E-29  |
| 14933 | 175 | 83   | 268  | 87   | 1.79E-28  | 369  | 157  | 6.64E-33  |
| 14934 | 24  | 42   | 50   | 26   | 0.0011369 | 62   | 27   | 1.71E-06  |
| 14935 | 5   | 52   | 39   | 90   | 0.0001883 | 35   | 136  | 7.55E-11  |
| 14951 | 3   | 14   | 0    | 8    | 0.008835  | 3    | 30   | 2.40E-05  |



|       |      |      |      |      |           |      |      |           |
|-------|------|------|------|------|-----------|------|------|-----------|
| 14952 | 82   | 74   | 129  | 66   | 5.04E-08  | 165  | 125  | 1.92E-05  |
| 14963 | 17   | 86   | 38   | 133  | 5.08E-11  | 71   | 169  | 3.42E-06  |
| 14966 | 211  | 944  | 372  | 1781 | 2.13E-180 | 528  | 2467 | 2.63E-210 |
| 14973 | 932  | 2181 | 1433 | 3129 | 1.02E-96  | 2187 | 4219 | 9.17E-62  |
| 14975 | 70   | 60   | 142  | 83   | 8.63E-07  | 194  | 115  | 8.86E-11  |
| 14978 | 24   | 10   | 43   | 13   | 5.53E-06  | 63   | 16   | 1.64E-10  |
| 14982 | 248  | 449  | 383  | 555  | 0.0004038 | 326  | 566  | 2.70E-06  |
| 14986 | 128  | 98   | 257  | 155  | 1.39E-10  | 360  | 197  | 7.80E-22  |
| 14993 | 85   | 30   | 93   | 29   | 3.26E-11  | 143  | 31   | 1.27E-24  |
| 14994 | 101  | 92   | 163  | 68   | 2.33E-13  | 161  | 122  | 2.57E-05  |
| 14995 | 81   | 83   | 100  | 58   | 2.93E-05  | 156  | 120  | 5.89E-05  |
| 14999 | 72   | 9    | 85   | 18   | 8.45E-14  | 74   | 14   | 2.09E-14  |
| 15003 | 266  | 251  | 301  | 170  | 5.90E-14  | 512  | 430  | 7.62E-10  |
| 15007 | 1887 | 4088 | 2463 | 3935 | 5.49E-39  | 3890 | 7306 | 1.49E-92  |
| 15013 | 8    | 13   | 17   | 3    | 0.0005295 | 33   | 16   | 0.0013816 |
| 15034 | 42   | 39   | 80   | 6    | 4.51E-20  | 45   | 19   | 3.91E-05  |
| 15038 | 9    | 65   | 5    | 63   | 2.41E-12  | 24   | 162  | 3.38E-20  |
| 15043 | 161  | 115  | 169  | 94   | 9.58E-09  | 221  | 193  | 0.0002431 |
| 15046 | 450  | 259  | 497  | 212  | 1.54E-36  | 764  | 359  | 1.46E-57  |
| 15050 | 41   | 13   | 45   | 1    | 2.99E-14  | 37   | 7    | 1.10E-07  |
| 15051 | 83   | 25   | 138  | 44   | 1.65E-15  | 194  | 61   | 9.77E-25  |
| 15057 | 57   | 34   | 58   | 14   | 4.07E-09  | 110  | 34   | 5.62E-15  |
| 15065 | 142  | 107  | 173  | 61   | 2.49E-17  | 269  | 242  | 0.0001783 |
| 15070 | 29   | 5    | 33   | 6    | 1.17E-06  | 29   | 8    | 3.73E-05  |
| 15071 | 6    | 118  | 9    | 126  | 2.10E-24  | 27   | 302  | 1.80E-47  |
| 15077 | 257  | 197  | 385  | 128  | 4.41E-39  | 449  | 287  | 1.27E-19  |
| 15090 | 40   | 14   | 45   | 27   | 0.0088955 | 53   | 30   | 0.0003723 |
| 15100 | 0    | 37   | 0    | 19   | 7.15E-06  | 7    | 125  | 8.29E-24  |
| 15104 | 66   | 147  | 78   | 221  | 4.64E-13  | 103  | 277  | 5.77E-12  |
| 15106 | 207  | 157  | 232  | 128  | 1.22E-11  | 245  | 217  | 0.0001756 |
| 15110 | 62   | 18   | 41   | 15   | 7.32E-05  | 50   | 26   | 0.0001886 |
| 15114 | 8    | 15   | 4    | 33   | 7.01E-06  | 4    | 32   | 2.89E-05  |
| 15120 | 95   | 41   | 113  | 19   | 1.91E-20  | 126  | 54   | 4.98E-12  |
| 15121 | 182  | 89   | 159  | 71   | 7.06E-12  | 329  | 178  | 1.48E-20  |
| 15145 | 106  | 190  | 74   | 176  | 5.34E-08  | 197  | 337  | 0.0005679 |
| 15153 | 22   | 43   | 12   | 50   | 9.98E-06  | 42   | 103  | 0.0002109 |
| 15156 | 74   | 19   | 123  | 12   | 4.73E-28  | 110  | 41   | 1.55E-12  |
| 15177 | 147  | 61   | 141  | 107  | 0.0014143 | 206  | 65   | 3.35E-26  |
| 15178 | 18   | 18   | 24   | 3    | 6.53E-06  | 36   | 21   | 0.0048577 |
| 15203 | 40   | 35   | 63   | 15   | 7.90E-10  | 67   | 39   | 0.0001168 |
| 15205 | 20   | 89   | 8    | 30   | 0.0016595 | 7    | 121  | 7.79E-23  |
| 15209 | 45   | 15   | 94   | 12   | 1.00E-19  | 75   | 24   | 3.28E-10  |
| 15214 | 161  | 117  | 163  | 54   | 1.46E-17  | 139  | 109  | 0.0002539 |
| 15228 | 15   | 11   | 33   | 8    | 1.20E-05  | 27   | 7    | 3.93E-05  |
| 15236 | 99   | 102  | 128  | 35   | 9.87E-17  | 186  | 128  | 1.42E-07  |
| 15246 | 236  | 531  | 252  | 478  | 4.21E-11  | 502  | 1333 | 1.39E-50  |
| 15247 | 534  | 495  | 592  | 294  | 1.21E-33  | 1032 | 727  | 1.75E-33  |
| 15248 | 20   | 1    | 44   | 0    | 2.57E-15  | 21   | 6    | 0.0006551 |
| 15250 | 1    | 19   | 0    | 12   | 0.0006424 | 4    | 45   | 4.88E-08  |
| 15259 | 80   | 53   | 82   | 30   | 1.84E-08  | 122  | 93   | 0.0002643 |
| 15261 | 118  | 75   | 85   | 46   | 3.23E-05  | 121  | 98   | 0.0013406 |
| 15287 | 129  | 107  | 185  | 64   | 7.65E-19  | 215  | 162  | 7.63E-07  |
| 15306 | 237  | 219  | 287  | 152  | 3.06E-15  | 457  | 381  | 3.07E-09  |
| 15311 | 80   | 38   | 54   | 18   | 1.27E-06  | 142  | 108  | 9.54E-05  |
| 15313 | 24   | 5    | 25   | 0    | 5.13E-09  | 35   | 8    | 7.70E-07  |
| 15318 | 43   | 104  | 42   | 122  | 4.29E-08  | 61   | 159  | 5.73E-07  |
| 15325 | 134  | 36   | 215  | 22   | 4.87E-47  | 183  | 69   | 1.25E-19  |
| 15326 | 69   | 16   | 41   | 10   | 1.45E-06  | 104  | 21   | 3.76E-19  |
| 15351 | 5    | 8    | 9    | 0    | 0.0010365 | 24   | 7    | 0.0002165 |
| 15355 | 2016 | 1576 | 2120 | 850  | 1.77E-164 | 2209 | 2152 | 4.72E-17  |
| 15356 | 63   | 254  | 79   | 140  | 0.0017948 | 138  | 491  | 1.35E-31  |
| 15362 | 133  | 422  | 125  | 259  | 2.71E-08  | 302  | 605  | 1.53E-11  |
| 15363 | 276  | 257  | 310  | 153  | 1.54E-18  | 526  | 391  | 3.05E-15  |
| 15377 | 151  | 60   | 192  | 59   | 7.58E-22  | 213  | 58   | 1.31E-30  |
| 15379 | 923  | 914  | 1338 | 857  | 1.95E-41  | 1439 | 1100 | 1.11E-35  |
| 15384 | 98   | 243  | 102  | 266  | 1.36E-13  | 104  | 414  | 5.71E-31  |

|       |     |      |      |      |           |      |      |           |
|-------|-----|------|------|------|-----------|------|------|-----------|
| 15400 | 407 | 258  | 644  | 539  | 7.76E-08  | 1042 | 534  | 8.37E-68  |
| 15402 | 53  | 9    | 53   | 0    | 2.66E-18  | 56   | 6    | 4.09E-14  |
| 15405 | 17  | 41   | 13   | 88   | 6.74E-13  | 28   | 122  | 5.18E-11  |
| 15417 | 380 | 305  | 511  | 367  | 6.75E-12  | 519  | 374  | 1.38E-16  |
| 15422 | 187 | 45   | 264  | 80   | 4.65E-30  | 301  | 63   | 2.04E-51  |
| 15423 | 82  | 479  | 89   | 840  | 7.96E-133 | 183  | 973  | 1.04E-94  |
| 15430 | 58  | 155  | 142  | 361  | 4.17E-17  | 278  | 553  | 2.22E-10  |
| 15432 | 117 | 53   | 181  | 53   | 1.15E-21  | 67   | 21   | 1.94E-09  |
| 15436 | 203 | 144  | 232  | 123  | 1.28E-12  | 331  | 256  | 5.13E-09  |
| 15439 | 143 | 143  | 284  | 233  | 0.0001734 | 292  | 214  | 1.66E-09  |
| 15447 | 28  | 67   | 41   | 125  | 7.97E-09  | 39   | 137  | 1.11E-09  |
| 15448 | 669 | 156  | 1000 | 265  | 8.44E-124 | 1131 | 106  | 1.52E-271 |
| 15451 | 232 | 230  | 445  | 394  | 0.0002095 | 567  | 459  | 2.49E-12  |
| 15456 | 193 | 115  | 248  | 106  | 5.64E-19  | 321  | 220  | 3.04E-12  |
| 15458 | 706 | 1494 | 1103 | 1834 | 4.85E-23  | 1273 | 3286 | 5.83E-115 |
| 15466 | 200 | 137  | 187  | 136  | 5.56E-05  | 177  | 165  | 0.0064237 |
| 15467 | 223 | 415  | 320  | 576  | 4.53E-11  | 477  | 772  | 1.29E-05  |
| 15476 | 55  | 29   | 78   | 50   | 0.0013447 | 63   | 21   | 1.49E-08  |
| 15485 | 20  | 3    | 36   | 8    | 2.31E-06  | 53   | 11   | 4.06E-10  |
| 15487 | 50  | 98   | 60   | 182  | 3.83E-12  | 92   | 214  | 3.55E-07  |
| 15496 | 8   | 37   | 18   | 106  | 6.61E-14  | 28   | 89   | 6.08E-06  |
| 15501 | 11  | 15   | 25   | 9    | 0.0017473 | 41   | 17   | 5.67E-05  |
| 15517 | 56  | 41   | 121  | 95   | 0.0062619 | 170  | 112  | 7.83E-08  |
| 15523 | 336 | 154  | 432  | 167  | 1.15E-36  | 539  | 259  | 7.73E-40  |
| 15525 | 170 | 133  | 91   | 43   | 8.70E-07  | 155  | 90   | 3.21E-09  |
| 15526 | 4   | 55   | 0    | 31   | 5.49E-09  | 12   | 107  | 4.75E-16  |
| 15529 | 26  | 152  | 56   | 240  | 2.68E-23  | 55   | 416  | 4.18E-53  |
| 15590 | 51  | 131  | 35   | 120  | 7.59E-10  | 67   | 206  | 1.68E-11  |
| 15605 | 69  | 83   | 130  | 49   | 1.92E-12  | 177  | 154  | 0.0008823 |
| 15616 | 74  | 74   | 123  | 80   | 7.45E-05  | 92   | 74   | 0.004779  |
| 15622 | 46  | 38   | 94   | 30   | 4.74E-11  | 62   | 42   | 0.0020816 |
| 15625 | 137 | 78   | 212  | 103  | 1.52E-13  | 280  | 114  | 9.13E-27  |
| 15630 | 138 | 93   | 289  | 170  | 2.10E-12  | 164  | 98   | 3.46E-09  |
| 15631 | 23  | 23   | 51   | 16   | 1.02E-06  | 57   | 25   | 5.72E-06  |
| 15642 | 122 | 80   | 172  | 131  | 0.0004293 | 248  | 136  | 1.66E-15  |
| 15650 | 176 | 326  | 177  | 411  | 4.13E-16  | 411  | 845  | 6.27E-17  |
| 15651 | 265 | 179  | 317  | 139  | 7.10E-23  | 458  | 323  | 1.12E-15  |
| 15655 | 114 | 94   | 197  | 92   | 1.78E-13  | 191  | 160  | 0.0001625 |
| 15665 | 151 | 115  | 233  | 118  | 1.12E-13  | 295  | 141  | 1.43E-22  |
| 15670 | 243 | 689  | 352  | 1135 | 1.79E-74  | 565  | 1624 | 1.06E-71  |
| 15690 | 54  | 56   | 70   | 48   | 0.0071932 | 112  | 53   | 1.34E-09  |
| 15693 | 11  | 57   | 36   | 91   | 3.56E-05  | 43   | 119  | 3.67E-06  |
| 15696 | 112 | 72   | 92   | 53   | 5.61E-05  | 196  | 58   | 1.88E-26  |
| 15697 | 88  | 48   | 32   | 10   | 0.0001386 | 56   | 38   | 0.0034728 |
| 15712 | 54  | 40   | 97   | 61   | 0.0002243 | 83   | 46   | 7.18E-06  |
| 15722 | 18  | 18   | 46   | 9    | 1.70E-08  | 65   | 33   | 1.47E-05  |
| 15741 | 43  | 48   | 85   | 35   | 1.07E-07  | 126  | 59   | 8.92E-11  |
| 15749 | 20  | 13   | 25   | 6    | 0.0001857 | 32   | 3    | 7.22E-09  |
| 15753 | 416 | 257  | 577  | 267  | 3.98E-37  | 697  | 268  | 8.68E-69  |
| 15754 | 105 | 352  | 112  | 534  | 5.56E-55  | 199  | 976  | 3.47E-88  |
| 15758 | 31  | 3    | 47   | 4    | 6.26E-12  | 51   | 10   | 3.58E-10  |
| 15763 | 30  | 102  | 30   | 65   | 0.0037705 | 56   | 206  | 1.06E-14  |
| 15768 | 335 | 244  | 195  | 145  | 8.58E-05  | 311  | 206  | 6.63E-13  |
| 15769 | 298 | 295  | 349  | 235  | 2.30E-10  | 543  | 458  | 3.25E-10  |
| 15772 | 164 | 152  | 193  | 129  | 1.82E-06  | 289  | 202  | 1.14E-10  |
| 15773 | 154 | 88   | 107  | 59   | 5.16E-06  | 173  | 120  | 4.88E-07  |
| 15774 | 88  | 73   | 121  | 78   | 6.38E-05  | 183  | 141  | 1.20E-05  |
| 15775 | 12  | 34   | 3    | 25   | 7.97E-05  | 29   | 77   | 0.0003932 |
| 15784 | 154 | 50   | 181  | 38   | 3.24E-28  | 220  | 109  | 2.66E-16  |
| 15789 | 78  | 37   | 113  | 45   | 3.59E-10  | 157  | 77   | 3.29E-12  |
| 15790 | 38  | 179  | 33   | 151  | 6.53E-16  | 77   | 424  | 2.12E-43  |
| 15802 | 9   | 45   | 10   | 49   | 2.58E-06  | 38   | 155  | 1.13E-12  |
| 15809 | 100 | 79   | 128  | 89   | 0.0002931 | 174  | 130  | 7.87E-06  |
| 15821 | 35  | 34   | 52   | 10   | 1.77E-09  | 76   | 54   | 0.0014023 |
| 15835 | 13  | 119  | 28   | 231  | 2.25E-35  | 51   | 338  | 5.69E-40  |
| 15836 | 142 | 433  | 158  | 808  | 1.67E-87  | 406  | 1084 | 6.00E-42  |

|       |     |     |     |     |           |     |      |           |
|-------|-----|-----|-----|-----|-----------|-----|------|-----------|
| 15845 | 70  | 15  | 58  | 10  | 5.35E-11  | 78  | 27   | 6.49E-10  |
| 15854 | 5   | 21  | 17  | 54  | 0.000112  | 17  | 71   | 1.39E-06  |
| 15861 | 196 | 271 | 253 | 381 | 0.0007089 | 393 | 701  | 2.00E-08  |
| 15864 | 25  | 17  | 28  | 6   | 3.66E-05  | 52  | 28   | 0.0002651 |
| 15872 | 206 | 189 | 161 | 134 | 0.0071623 | 255 | 225  | 0.000111  |
| 15878 | 136 | 79  | 155 | 89  | 1.15E-07  | 216 | 172  | 8.11E-06  |
| 15883 | 14  | 13  | 24  | 8   | 0.0020466 | 25  | 11   | 0.0036901 |
| 15893 | 51  | 32  | 81  | 12  | 5.38E-16  | 74  | 51   | 0.0011049 |
| 15895 | 28  | 31  | 45  | 12  | 7.83E-07  | 51  | 28   | 0.0003824 |
| 15898 | 10  | 17  | 0   | 16  | 4.86E-05  | 8   | 40   | 6.51E-05  |
| 15902 | 19  | 53  | 13  | 39  | 0.0019532 | 33  | 109  | 2.65E-07  |
| 15904 | 74  | 156 | 48  | 125 | 5.39E-07  | 134 | 362  | 2.74E-15  |
| 15905 | 16  | 10  | 16  | 0   | 4.95E-06  | 17  | 4    | 0.0007589 |
| 15913 | 49  | 54  | 99  | 32  | 2.49E-11  | 91  | 76   | 0.0099514 |
| 15916 | 153 | 845 | 150 | 650 | 6.41E-61  | 182 | 1238 | 7.36E-145 |
| 15918 | 22  | 66  | 25  | 63  | 0.0005749 | 27  | 71   | 0.0007405 |
| 15921 | 439 | 260 | 425 | 109 | 4.25E-55  | 805 | 406  | 3.23E-54  |
| 15926 | 293 | 96  | 239 | 74  | 9.65E-27  | 263 | 112  | 8.61E-24  |
| 15931 | 7   | 26  | 6   | 30  | 0.0003043 | 23  | 63   | 0.0010246 |
| 15938 | 564 | 359 | 536 | 178 | 7.31E-54  | 704 | 380  | 2.12E-42  |
| 15950 | 25  | 55  | 36  | 105 | 4.29E-07  | 39  | 123  | 1.21E-07  |
| 15952 | 31  | 24  | 59  | 26  | 2.75E-05  | 75  | 46   | 0.0001074 |
| 15957 | 11  | 22  | 0   | 14  | 0.000176  | 5   | 51   | 1.47E-08  |
| 15960 | 74  | 169 | 76  | 159 | 1.05E-05  | 128 | 451  | 9.95E-29  |
| 15962 | 399 | 760 | 323 | 495 | 4.67E-05  | 653 | 1199 | 2.70E-15  |
| 15966 | 105 | 0   | 118 | 0   | 7.43E-40  | 169 | 3    | 2.72E-55  |
| 15999 | 203 | 234 | 228 | 200 | 0.0065968 | 308 | 296  | 0.001039  |
| 16002 | 74  | 70  | 126 | 64  | 5.22E-08  | 128 | 111  | 0.005009  |
| 16006 | 0   | 43  | 0   | 23  | 5.65E-07  | 6   | 81   | 1.48E-14  |
| 16008 | 25  | 23  | 39  | 21  | 0.0060932 | 69  | 35   | 6.89E-06  |
| 16018 | 28  | 8   | 43  | 1   | 1.32E-13  | 30  | 14   | 0.0020398 |
| 16029 | 385 | 874 | 389 | 615 | 5.54E-07  | 673 | 1855 | 2.52E-75  |
| 16050 | 63  | 74  | 56  | 16  | 8.40E-08  | 90  | 47   | 6.54E-07  |
| 16052 | 175 | 248 | 289 | 416 | 0.0028479 | 403 | 605  | 0.0057901 |
| 16053 | 103 | 419 | 197 | 544 | 5.99E-29  | 243 | 951  | 1.64E-67  |
| 16062 | 2   | 11  | 0   | 9   | 0.0045666 | 2   | 28   | 8.99E-06  |
| 16068 | 64  | 45  | 50  | 12  | 5.55E-08  | 113 | 43   | 1.90E-12  |
| 16076 | 308 | 384 | 372 | 326 | 0.000413  | 537 | 477  | 3.55E-08  |
| 16086 | 19  | 17  | 32  | 3   | 3.56E-08  | 28  | 12   | 0.0012559 |
| 16098 | 24  | 154 | 28  | 70  | 0.0003479 | 44  | 238  | 1.01E-24  |
| 16106 | 300 | 674 | 389 | 554 | 0.0009736 | 695 | 1362 | 2.66E-22  |
| 16108 | 313 | 216 | 355 | 266 | 1.54E-07  | 531 | 386  | 1.92E-16  |
| 16121 | 447 | 199 | 521 | 118 | 4.91E-74  | 688 | 207  | 1.33E-87  |
| 16123 | 62  | 103 | 48  | 93  | 0.0030167 | 92  | 200  | 9.02E-06  |
| 16126 | 17  | 134 | 39  | 195 | 6.48E-22  | 49  | 382  | 8.95E-50  |
| 16128 | 20  | 65  | 33  | 79  | 0.0002833 | 41  | 114  | 5.01E-06  |
| 16139 | 5   | 2   | 7   | 0   | 0.0047728 | 24  | 3    | 1.97E-06  |
| 16150 | 274 | 312 | 261 | 130 | 1.14E-15  | 475 | 486  | 0.001622  |
| 16151 | 3   | 19  | 2   | 16  | 0.0032183 | 2   | 18   | 0.0013482 |
| 16154 | 509 | 383 | 603 | 215 | 1.02E-55  | 683 | 426  | 8.56E-31  |
| 16172 | 23  | 123 | 32  | 229 | 2.03E-32  | 49  | 317  | 5.99E-37  |
| 16176 | 89  | 62  | 178 | 78  | 1.47E-13  | 174 | 124  | 1.15E-06  |
| 16181 | 56  | 34  | 43  | 11  | 8.31E-07  | 57  | 25   | 5.72E-06  |
| 16182 | 9   | 66  | 6   | 39  | 3.30E-06  | 15  | 98   | 1.69E-12  |
| 16184 | 110 | 51  | 105 | 65  | 8.05E-05  | 86  | 37   | 1.52E-08  |
| 16191 | 43  | 12  | 42  | 22  | 0.0024889 | 44  | 11   | 7.93E-08  |
| 16193 | 86  | 14  | 85  | 5   | 1.55E-22  | 133 | 30   | 2.23E-22  |
| 16196 | 24  | 17  | 13  | 3   | 0.0096913 | 47  | 25   | 0.0004906 |
| 16199 | 54  | 65  | 117 | 67  | 3.95E-06  | 128 | 90   | 2.15E-05  |
| 16205 | 141 | 103 | 161 | 65  | 7.57E-14  | 213 | 159  | 6.27E-07  |
| 16208 | 25  | 16  | 39  | 11  | 1.11E-05  | 33  | 17   | 0.0025099 |
| 16209 | 29  | 20  | 29  | 7   | 3.72E-05  | 47  | 14   | 3.75E-07  |
| 16214 | 87  | 35  | 87  | 25  | 2.69E-11  | 68  | 37   | 3.00E-05  |
| 16221 | 63  | 304 | 59  | 167 | 3.21E-10  | 118 | 407  | 2.11E-25  |
| 16222 | 5   | 31  | 6   | 41  | 1.17E-06  | 16  | 59   | 3.84E-05  |
| 16232 | 39  | 36  | 42  | 17  | 0.0001979 | 52  | 29   | 0.0004505 |

|       |      |     |      |     |           |      |      |           |
|-------|------|-----|------|-----|-----------|------|------|-----------|
| 16240 | 42   | 83  | 82   | 18  | 4.39E-13  | 118  | 97   | 0.0019704 |
| 16244 | 389  | 325 | 462  | 231 | 2.54E-26  | 498  | 425  | 4.96E-09  |
| 16248 | 248  | 72  | 285  | 46  | 1.13E-50  | 343  | 101  | 2.65E-45  |
| 16265 | 37   | 12  | 65   | 20  | 2.38E-08  | 22   | 4    | 3.31E-05  |
| 16269 | 90   | 64  | 127  | 81  | 3.68E-05  | 180  | 94   | 1.28E-12  |
| 16271 | 63   | 29  | 88   | 14  | 8.26E-17  | 115  | 87   | 0.0003753 |
| 16274 | 92   | 219 | 106  | 230 | 2.63E-08  | 204  | 528  | 7.01E-20  |
| 16279 | 166  | 83  | 234  | 41  | 3.44E-40  | 300  | 146  | 1.88E-22  |
| 16280 | 47   | 51  | 75   | 38  | 2.75E-05  | 107  | 70   | 1.96E-05  |
| 16281 | 455  | 299 | 420  | 91  | 5.33E-62  | 671  | 418  | 2.90E-30  |
| 16283 | 284  | 187 | 359  | 143 | 1.51E-29  | 395  | 313  | 9.73E-10  |
| 16284 | 84   | 73  | 113  | 63  | 3.29E-06  | 176  | 108  | 2.45E-09  |
| 16287 | 0    | 9   | 0    | 14  | 0.000176  | 1    | 14   | 0.002912  |
| 16290 | 211  | 86  | 286  | 61  | 3.26E-43  | 290  | 118  | 1.33E-27  |
| 16296 | 80   | 77  | 103  | 65  | 0.0001407 | 185  | 154  | 0.0001568 |
| 16301 | 86   | 97  | 150  | 113 | 0.0008145 | 207  | 197  | 0.005819  |
| 16303 | 89   | 45  | 128  | 53  | 6.62E-11  | 109  | 95   | 0.0091129 |
| 16309 | 60   | 62  | 100  | 65  | 0.0004122 | 125  | 96   | 0.0003128 |
| 16317 | 186  | 179 | 200  | 71  | 1.30E-19  | 265  | 220  | 5.66E-06  |
| 16318 | 120  | 102 | 161  | 92  | 6.46E-08  | 241  | 156  | 6.89E-11  |
| 16322 | 373  | 324 | 439  | 344 | 1.29E-07  | 747  | 639  | 9.90E-13  |
| 16328 | 9    | 46  | 7    | 47  | 3.00E-07  | 17   | 119  | 2.46E-15  |
| 16455 | 163  | 532 | 245  | 777 | 2.51E-50  | 426  | 1099 | 1.38E-39  |
| 16464 | 81   | 90  | 158  | 126 | 0.0023899 | 154  | 118  | 5.24E-05  |
| 16478 | 85   | 121 | 199  | 150 | 0.0001069 | 191  | 168  | 0.0007977 |
| 16481 | 42   | 50  | 72   | 38  | 7.79E-05  | 116  | 79   | 2.56E-05  |
| 16494 | 12   | 14  | 14   | 2   | 0.0015291 | 31   | 14   | 0.0013388 |
| 16495 | 35   | 20  | 71   | 35  | 3.44E-05  | 61   | 18   | 4.06E-09  |
| 16499 | 224  | 146 | 265  | 99  | 4.73E-24  | 500  | 177  | 1.14E-54  |
| 16500 | 8    | 3   | 19   | 1   | 9.13E-06  | 24   | 10   | 0.002796  |
| 16504 | 36   | 23  | 91   | 38  | 4.43E-08  | 72   | 51   | 0.0019136 |
| 16506 | 75   | 60  | 126  | 95  | 0.0023382 | 168  | 137  | 0.0001725 |
| 16508 | 3    | 30  | 0    | 60  | 7.53E-17  | 15   | 65   | 2.36E-06  |
| 16510 | 22   | 16  | 17   | 3   | 0.0005295 | 30   | 17   | 0.0079795 |
| 16518 | 545  | 29  | 784  | 18  | 3.26E-229 | 941  | 40   | 4.68E-272 |
| 16519 | 3    | 0   | 7    | 0   | 0.0047728 | 12   | 0    | 5.74E-05  |
| 16524 | 129  | 108 | 153  | 101 | 1.70E-05  | 226  | 196  | 0.0001557 |
| 16539 | 147  | 82  | 217  | 36  | 1.44E-38  | 244  | 88   | 5.43E-27  |
| 16547 | 38   | 37  | 75   | 38  | 2.75E-05  | 100  | 66   | 4.32E-05  |
| 16548 | 54   | 40  | 96   | 26  | 4.79E-13  | 102  | 64   | 1.04E-05  |
| 16549 | 324  | 272 | 380  | 154 | 1.87E-30  | 509  | 404  | 4.45E-12  |
| 16556 | 52   | 51  | 73   | 22  | 2.79E-09  | 108  | 77   | 0.0001472 |
| 16559 | 114  | 278 | 130  | 391 | 3.77E-24  | 266  | 542  | 4.72E-11  |
| 16560 | 143  | 115 | 176  | 96  | 2.54E-09  | 197  | 165  | 0.0001331 |
| 16567 | 70   | 38  | 69   | 15  | 3.03E-11  | 78   | 34   | 9.12E-08  |
| 16574 | 161  | 108 | 120  | 87  | 0.0012963 | 144  | 127  | 0.0039843 |
| 16579 | 7    | 18  | 7    | 44  | 8.40E-07  | 10   | 39   | 0.0007605 |
| 16581 | 13   | 3   | 15   | 4   | 0.0051828 | 13   | 3    | 0.0040983 |
| 16585 | 501  | 131 | 676  | 149 | 1.81E-97  | 405  | 121  | 1.57E-52  |
| 16596 | 70   | 161 | 74   | 141 | 0.0003573 | 56   | 200  | 1.06E-13  |
| 16602 | 109  | 314 | 99   | 433 | 1.29E-41  | 145  | 393  | 1.16E-16  |
| 16614 | 146  | 183 | 132  | 100 | 0.0019249 | 276  | 268  | 0.0028741 |
| 16622 | 60   | 28  | 71   | 33  | 1.14E-05  | 109  | 64   | 1.08E-06  |
| 16713 | 18   | 8   | 47   | 14  | 1.90E-06  | 41   | 12   | 1.21E-06  |
| 16720 | 22   | 5   | 39   | 9   | 1.39E-06  | 26   | 12   | 0.0030901 |
| 16731 | 178  | 102 | 313  | 111 | 7.79E-30  | 445  | 143  | 7.57E-54  |
| 16736 | 17   | 47  | 18   | 60  | 2.10E-05  | 24   | 61   | 0.0030016 |
| 16739 | 48   | 278 | 36   | 334 | 2.59E-53  | 116  | 673  | 8.06E-71  |
| 16745 | 26   | 10  | 24   | 8   | 0.0020466 | 50   | 11   | 2.36E-09  |
| 16761 | 667  | 811 | 740  | 577 | 3.58E-12  | 1024 | 1078 | 5.31E-05  |
| 16763 | 3    | 14  | 0    | 24  | 3.00E-07  | 11   | 33   | 0.0097015 |
| 16764 | 56   | 48  | 84   | 29  | 3.52E-09  | 94   | 73   | 0.0022892 |
| 16765 | 1285 | 368 | 1312 | 344 | 2.61E-163 | 1827 | 544  | 1.22E-231 |
| 16766 | 674  | 242 | 977  | 248 | 1.72E-125 | 839  | 236  | 9.76E-113 |
| 16771 | 52   | 40  | 84   | 16  | 1.27E-14  | 73   | 51   | 0.0014565 |
| 16772 | 465  | 402 | 513  | 234 | 5.27E-34  | 686  | 533  | 7.28E-17  |

|       |      |      |     |      |           |     |      |           |
|-------|------|------|-----|------|-----------|-----|------|-----------|
| 16777 | 130  | 369  | 154 | 338  | 6.12E-12  | 258 | 706  | 2.59E-29  |
| 16789 | 6    | 112  | 8   | 79   | 5.86E-14  | 19  | 305  | 1.73E-54  |
| 16790 | 240  | 90   | 298 | 63   | 4.40E-45  | 421 | 103  | 3.96E-64  |
| 16803 | 304  | 252  | 291 | 175  | 8.20E-12  | 505 | 471  | 3.38E-06  |
| 16832 | 556  | 336  | 634 | 226  | 1.31E-58  | 658 | 463  | 6.17E-22  |
| 16920 | 143  | 134  | 176 | 70   | 2.91E-15  | 242 | 229  | 0.0021845 |
| 16944 | 68   | 43   | 89  | 17   | 2.61E-15  | 101 | 47   | 5.97E-09  |
| 16946 | 318  | 205  | 416 | 179  | 1.82E-30  | 496 | 263  | 2.48E-31  |
| 16955 | 208  | 79   | 240 | 96   | 5.07E-20  | 292 | 98   | 2.11E-34  |
| 16960 | 5    | 7    | 7   | 0    | 0.0047728 | 12  | 1    | 0.0004409 |
| 16967 | 8    | 30   | 8   | 67   | 4.55E-11  | 32  | 86   | 0.0001327 |
| 16968 | 128  | 298  | 165 | 271  | 0.000256  | 281 | 579  | 4.18E-12  |
| 16972 | 173  | 413  | 196 | 307  | 0.000573  | 292 | 722  | 3.78E-24  |
| 16996 | 324  | 215  | 389 | 176  | 1.98E-26  | 633 | 336  | 2.16E-39  |
| 17002 | 129  | 297  | 123 | 318  | 1.08E-15  | 147 | 508  | 2.29E-31  |
| 17009 | 161  | 372  | 251 | 569  | 1.17E-20  | 493 | 813  | 1.62E-06  |
| 17017 | 274  | 115  | 288 | 149  | 5.31E-16  | 346 | 240  | 1.08E-12  |
| 17035 | 345  | 220  | 537 | 266  | 7.34E-31  | 556 | 341  | 3.07E-26  |
| 17050 | 190  | 60   | 171 | 59   | 2.08E-17  | 154 | 59   | 1.99E-16  |
| 17059 | 93   | 299  | 124 | 339  | 2.49E-18  | 170 | 592  | 9.91E-37  |
| 17069 | 25   | 15   | 30  | 8    | 5.99E-05  | 43  | 25   | 0.0020827 |
| 17072 | 56   | 10   | 64  | 22   | 1.99E-07  | 67  | 18   | 9.92E-11  |
| 17075 | 37   | 23   | 33  | 15   | 0.0022261 | 91  | 37   | 1.09E-09  |
| 17089 | 1    | 24   | 0   | 18   | 1.35E-05  | 3   | 25   | 0.0001918 |
| 17114 | 19   | 128  | 58  | 237  | 5.34E-22  | 57  | 254  | 4.61E-22  |
| 17118 | 16   | 5    | 17  | 4    | 0.0017123 | 20  | 6    | 0.0011236 |
| 17124 | 184  | 75   | 169 | 48   | 6.71E-21  | 275 | 194  | 6.55E-10  |
| 17131 | 279  | 166  | 334 | 120  | 2.76E-31  | 436 | 207  | 4.69E-33  |
| 17136 | 10   | 1    | 41  | 7    | 3.74E-08  | 21  | 4    | 6.26E-05  |
| 17142 | 67   | 20   | 173 | 31   | 1.27E-29  | 142 | 45   | 1.82E-18  |
| 17144 | 76   | 99   | 161 | 125  | 0.001091  | 225 | 193  | 9.77E-05  |
| 17149 | 17   | 43   | 39  | 117  | 3.20E-08  | 37  | 93   | 0.0002655 |
| 17159 | 12   | 40   | 28  | 95   | 5.71E-08  | 30  | 119  | 8.06E-10  |
| 17160 | 24   | 6    | 64  | 7    | 1.27E-14  | 52  | 24   | 2.53E-05  |
| 17161 | 189  | 332  | 252 | 598  | 7.57E-24  | 408 | 609  | 0.0072769 |
| 17162 | 205  | 432  | 319 | 490  | 4.25E-05  | 480 | 1049 | 5.23E-25  |
| 17167 | 146  | 79   | 237 | 115  | 5.98E-15  | 291 | 148  | 2.68E-20  |
| 17173 | 27   | 8    | 20  | 7    | 0.0058718 | 21  | 5    | 0.0002167 |
| 17180 | 80   | 78   | 109 | 48   | 1.22E-08  | 166 | 125  | 1.51E-05  |
| 17199 | 210  | 82   | 174 | 59   | 3.37E-18  | 192 | 53   | 1.65E-27  |
| 17217 | 155  | 106  | 236 | 178  | 2.65E-05  | 314 | 218  | 1.30E-11  |
| 17226 | 42   | 26   | 53  | 33   | 0.0065652 | 121 | 45   | 1.40E-13  |
| 17239 | 118  | 67   | 191 | 65   | 1.09E-19  | 334 | 138  | 4.86E-31  |
| 17240 | 36   | 34   | 45  | 18   | 0.0001125 | 83  | 45   | 4.24E-06  |
| 17244 | 67   | 542  | 100 | 746  | 1.13E-104 | 199 | 1473 | 6.43E-182 |
| 17250 | 445  | 308  | 513 | 336  | 7.39E-16  | 573 | 419  | 2.16E-17  |
| 17279 | 51   | 44   | 56  | 17   | 2.08E-07  | 110 | 83   | 0.000477  |
| 17282 | 7    | 32   | 14  | 50   | 7.42E-05  | 23  | 100  | 2.85E-09  |
| 17288 | 42   | 18   | 41  | 20   | 0.0018203 | 90  | 36   | 1.29E-09  |
| 17297 | 19   | 39   | 8   | 51   | 1.18E-07  | 27  | 62   | 0.0076072 |
| 17299 | 63   | 66   | 143 | 86   | 1.59E-06  | 170 | 131  | 2.72E-05  |
| 17313 | 6    | 30   | 10  | 35   | 0.0008925 | 6   | 26   | 0.0037714 |
| 17316 | 298  | 1213 | 524 | 2984 | 0         | 838 | 4035 | 0         |
| 17318 | 115  | 87   | 134 | 83   | 8.54E-06  | 228 | 121  | 3.48E-15  |
| 17319 | 582  | 322  | 693 | 231  | 5.58E-69  | 931 | 492  | 1.54E-57  |
| 17321 | 20   | 17   | 31  | 6    | 3.83E-06  | 66  | 27   | 2.92E-07  |
| 17323 | 52   | 30   | 74  | 53   | 0.0096819 | 113 | 54   | 1.66E-09  |
| 17325 | 95   | 323  | 174 | 810  | 6.92E-81  | 171 | 815  | 5.14E-72  |
| 17338 | 237  | 108  | 519 | 254  | 1.58E-30  | 407 | 202  | 6.08E-29  |
| 17341 | 116  | 89   | 229 | 145  | 1.74E-08  | 259 | 160  | 8.46E-13  |
| 17342 | 37   | 108  | 46  | 155  | 4.55E-12  | 102 | 207  | 5.76E-05  |
| 17343 | 6    | 33   | 11  | 43   | 9.51E-05  | 19  | 51   | 0.0037101 |
| 17348 | 102  | 649  | 157 | 1165 | 4.60E-162 | 212 | 1534 | 1.35E-186 |
| 17349 | 17   | 114  | 22  | 201  | 1.74E-32  | 50  | 410  | 5.88E-55  |
| 17364 | 1107 | 1028 | 761 | 714  | 0.0001371 | 963 | 625  | 6.61E-39  |
| 17372 | 90   | 77   | 156 | 79   | 1.16E-09  | 296 | 176  | 1.15E-15  |

|       |     |      |      |      |           |      |      |           |
|-------|-----|------|------|------|-----------|------|------|-----------|
| 17375 | 107 | 38   | 89   | 25   | 9.97E-12  | 105  | 59   | 5.32E-07  |
| 17380 | 210 | 517  | 340  | 924  | 1.06E-46  | 345  | 804  | 3.21E-23  |
| 17381 | 5   | 36   | 6    | 27   | 0.0012818 | 10   | 39   | 0.0007605 |
| 17383 | 2   | 29   | 0    | 20   | 3.79E-06  | 3    | 55   | 3.50E-11  |
| 17386 | 78  | 8    | 134  | 15   | 9.38E-29  | 100  | 11   | 3.98E-24  |
| 17389 | 74  | 45   | 88   | 59   | 0.0015917 | 109  | 67   | 3.04E-06  |
| 17390 | 485 | 308  | 769  | 520  | 6.76E-21  | 1025 | 485  | 6.80E-76  |
| 17392 | 617 | 1404 | 1059 | 2775 | 4.95E-128 | 1487 | 2487 | 1.24E-18  |
| 17393 | 17  | 84   | 6    | 103  | 3.27E-21  | 30   | 161  | 6.91E-17  |
| 17400 | 73  | 44   | 119  | 73   | 2.38E-05  | 104  | 47   | 1.76E-09  |
| 17404 | 141 | 68   | 88   | 38   | 2.21E-07  | 144  | 74   | 1.24E-10  |
| 17407 | 24  | 14   | 36   | 11   | 4.82E-05  | 59   | 17   | 4.31E-09  |
| 17414 | 47  | 25   | 81   | 28   | 6.12E-09  | 98   | 35   | 8.55E-12  |
| 17423 | 27  | 14   | 63   | 27   | 1.05E-05  | 88   | 54   | 2.95E-05  |
| 17425 | 104 | 96   | 174  | 142  | 0.0027654 | 183  | 172  | 0.0064098 |
| 17429 | 133 | 98   | 256  | 148  | 1.55E-11  | 209  | 135  | 1.22E-09  |
| 17439 | 48  | 229  | 75   | 424  | 1.84E-50  | 119  | 618  | 1.71E-59  |
| 17448 | 425 | 239  | 337  | 255  | 5.69E-07  | 383  | 175  | 6.02E-31  |
| 17458 | 124 | 321  | 172  | 314  | 6.53E-07  | 266  | 536  | 1.34E-10  |
| 17459 | 10  | 16   | 24   | 4    | 2.85E-05  | 40   | 18   | 0.0001766 |
| 17466 | 93  | 65   | 134  | 55   | 2.16E-11  | 169  | 67   | 2.62E-17  |
| 17469 | 2   | 24   | 5    | 35   | 8.15E-06  | 3    | 110  | 3.16E-24  |
| 17472 | 24  | 90   | 20   | 185  | 3.49E-30  | 69   | 225  | 1.44E-13  |
| 17478 | 263 | 142  | 321  | 168  | 3.11E-17  | 472  | 307  | 9.43E-20  |
| 17481 | 595 | 383  | 576  | 372  | 2.85E-18  | 1122 | 780  | 1.11E-37  |
| 17484 | 93  | 54   | 67   | 31   | 1.65E-05  | 115  | 65   | 1.61E-07  |
| 17485 | 223 | 144  | 225  | 156  | 1.24E-06  | 305  | 228  | 2.53E-09  |
| 17488 | 44  | 140  | 62   | 220  | 1.35E-17  | 101  | 341  | 6.01E-21  |
| 17505 | 46  | 96   | 85   | 142  | 0.006267  | 119  | 243  | 1.04E-05  |
| 17506 | 67  | 58   | 96   | 69   | 0.0029839 | 144  | 105  | 2.30E-05  |
| 17509 | 26  | 115  | 59   | 151  | 4.96E-08  | 91   | 275  | 1.61E-14  |
| 17517 | 317 | 189  | 389  | 316  | 5.63E-06  | 532  | 253  | 6.76E-40  |
| 17522 | 11  | 59   | 15   | 50   | 0.0001468 | 27   | 145  | 2.29E-15  |
| 17523 | 1   | 35   | 7    | 79   | 1.23E-14  | 10   | 36   | 0.0017098 |
| 17524 | 10  | 40   | 13   | 119  | 7.85E-20  | 37   | 130  | 2.91E-09  |
| 17527 | 1   | 35   | 7    | 60   | 2.83E-10  | 12   | 76   | 9.92E-10  |
| 17534 | 137 | 111  | 177  | 107  | 1.32E-07  | 276  | 185  | 2.68E-11  |
| 17535 | 98  | 302  | 188  | 595  | 8.56E-39  | 223  | 685  | 6.01E-35  |
| 17541 | 421 | 282  | 476  | 295  | 4.37E-17  | 736  | 441  | 5.64E-36  |
| 17542 | 2   | 10   | 14   | 39   | 0.0034972 | 5    | 24   | 0.0041608 |
| 17545 | 152 | 241  | 186  | 413  | 1.15E-14  | 337  | 555  | 7.93E-05  |
| 17547 | 27  | 88   | 22   | 180  | 9.15E-28  | 48   | 175  | 1.52E-12  |
| 17548 | 41  | 47   | 27   | 67   | 0.0005715 | 84   | 151  | 0.008534  |
| 17549 | 268 | 1457 | 339  | 1397 | 1.14E-122 | 544  | 3413 | 0         |
| 17562 | 18  | 88   | 41   | 175  | 3.74E-17  | 68   | 177  | 1.07E-07  |
| 17564 | 238 | 304  | 291  | 520  | 7.89E-10  | 453  | 777  | 1.05E-07  |
| 17565 | 12  | 19   | 14   | 50   | 7.42E-05  | 10   | 37   | 0.0017241 |
| 17577 | 45  | 217  | 93   | 425  | 1.45E-42  | 101  | 497  | 8.35E-46  |
| 17580 | 227 | 102  | 299  | 190  | 1.25E-10  | 492  | 197  | 8.63E-47  |
| 17587 | 83  | 187  | 106  | 198  | 4.16E-05  | 250  | 394  | 0.0054553 |
| 17588 | 269 | 488  | 369  | 622  | 2.88E-09  | 506  | 812  | 1.49E-05  |
| 17589 | 140 | 42   | 177  | 72   | 7.28E-15  | 262  | 81   | 1.47E-33  |
| 17593 | 89  | 62   | 180  | 128  | 3.64E-05  | 228  | 148  | 2.41E-10  |
| 17597 | 5   | 8    | 0    | 9    | 0.0045666 | 2    | 17   | 0.0022624 |
| 17605 | 90  | 48   | 98   | 62   | 0.0002448 | 167  | 91   | 5.95E-11  |
| 17606 | 182 | 112  | 321  | 171  | 1.28E-16  | 205  | 111  | 3.00E-13  |
| 17607 | 12  | 6    | 38   | 15   | 0.0002751 | 30   | 12   | 0.0004963 |
| 17628 | 50  | 32   | 110  | 62   | 5.46E-06  | 75   | 33   | 1.67E-07  |
| 17660 | 6   | 16   | 17   | 48   | 0.0010655 | 14   | 60   | 5.79E-06  |
| 17690 | 144 | 278  | 164  | 312  | 8.70E-08  | 324  | 539  | 5.97E-05  |
| 17691 | 23  | 38   | 21   | 75   | 9.11E-07  | 33   | 91   | 5.99E-05  |
| 17692 | 55  | 79   | 133  | 85   | 2.30E-05  | 160  | 138  | 0.0013068 |
| 17698 | 30  | 8    | 59   | 0    | 2.73E-20  | 25   | 0    | 1.46E-09  |
| 17699 | 92  | 28   | 113  | 54   | 5.64E-08  | 135  | 56   | 2.66E-13  |
| 17702 | 5   | 48   | 25   | 68   | 0.0001519 | 9    | 136  | 1.96E-24  |
| 17710 | 338 | 198  | 276  | 106  | 4.14E-24  | 446  | 287  | 3.09E-19  |

|       |     |     |     |     |           |      |      |           |
|-------|-----|-----|-----|-----|-----------|------|------|-----------|
| 17717 | 0   | 12  | 0   | 9   | 0.0045666 | 5    | 26   | 0.0016349 |
| 17721 | 219 | 215 | 347 | 259 | 1.69E-07  | 416  | 391  | 3.87E-05  |
| 17726 | 45  | 31  | 77  | 30  | 1.56E-07  | 56   | 29   | 7.10E-05  |
| 17728 | 95  | 132 | 121 | 335 | 1.96E-18  | 109  | 288  | 5.70E-12  |
| 17739 | 110 | 102 | 144 | 62  | 1.55E-11  | 129  | 97   | 0.0001276 |
| 17740 | 52  | 141 | 71  | 181 | 2.87E-09  | 110  | 273  | 4.85E-10  |
| 17757 | 41  | 52  | 40  | 126 | 2.95E-09  | 76   | 147  | 0.0023456 |
| 17761 | 216 | 637 | 297 | 978 | 2.34E-66  | 449  | 1446 | 1.22E-77  |
| 17762 | 31  | 111 | 46  | 166 | 8.49E-14  | 79   | 172  | 3.41E-05  |
| 17766 | 474 | 312 | 662 | 478 | 9.19E-15  | 832  | 593  | 2.17E-26  |
| 17768 | 45  | 144 | 32  | 306 | 1.09E-49  | 104  | 600  | 3.56E-63  |
| 17772 | 25  | 91  | 20  | 95  | 6.11E-11  | 48   | 174  | 2.23E-12  |
| 17782 | 149 | 265 | 196 | 296 | 0.0028251 | 342  | 630  | 8.29E-09  |
| 17787 | 26  | 22  | 93  | 13  | 8.85E-19  | 61   | 36   | 0.0003027 |
| 17803 | 74  | 57  | 102 | 65  | 0.0001852 | 156  | 80   | 1.87E-11  |
| 17804 | 71  | 163 | 113 | 231 | 2.46E-07  | 188  | 313  | 0.0022087 |
| 17805 | 6   | 24  | 0   | 59  | 1.47E-16  | 8    | 90   | 4.42E-15  |
| 17807 | 3   | 15  | 0   | 38  | 5.54E-11  | 5    | 37   | 1.30E-05  |
| 17812 | 79  | 92  | 121 | 61  | 9.13E-08  | 148  | 124  | 0.00095   |
| 17827 | 220 | 160 | 313 | 142 | 1.89E-21  | 496  | 300  | 2.66E-24  |
| 17828 | 76  | 67  | 51  | 96  | 0.0037526 | 78   | 143  | 0.0067446 |
| 17836 | 89  | 63  | 107 | 38  | 4.86E-11  | 59   | 24   | 1.16E-06  |
| 17838 | 45  | 55  | 60  | 36  | 0.0020299 | 129  | 73   | 3.35E-08  |
| 17844 | 480 | 503 | 764 | 748 | 0.0023429 | 1222 | 851  | 1.38E-40  |
| 17848 | 28  | 9   | 47  | 19  | 6.18E-05  | 46   | 11   | 2.47E-08  |
| 17861 | 88  | 55  | 53  | 23  | 7.03E-05  | 63   | 42   | 0.001552  |
| 17864 | 647 | 275 | 681 | 200 | 3.03E-77  | 549  | 290  | 1.16E-34  |
| 17865 | 235 | 247 | 304 | 122 | 5.82E-25  | 528  | 455  | 3.83E-09  |
| 17867 | 52  | 20  | 81  | 23  | 8.50E-11  | 125  | 58   | 7.20E-11  |
| 17881 | 65  | 109 | 66  | 122 | 0.0016175 | 81   | 163  | 0.0004793 |
| 17884 | 29  | 6   | 74  | 0   | 2.89E-25  | 46   | 19   | 2.51E-05  |
| 17896 | 21  | 76  | 7   | 70  | 2.11E-12  | 21   | 142  | 7.36E-18  |
| 17908 | 67  | 57  | 96  | 47  | 8.69E-07  | 125  | 69   | 2.61E-08  |
| 17920 | 46  | 72  | 34  | 72  | 0.0032987 | 20   | 69   | 2.41E-05  |
| 17923 | 130 | 65  | 149 | 49  | 3.94E-16  | 191  | 87   | 2.73E-16  |
| 17926 | 198 | 491 | 192 | 335 | 2.78E-06  | 384  | 1010 | 5.76E-38  |
| 17930 | 70  | 42  | 85  | 24  | 2.86E-11  | 100  | 68   | 9.25E-05  |
| 17932 | 63  | 52  | 85  | 32  | 1.37E-08  | 78   | 59   | 0.0033554 |
| 17934 | 108 | 63  | 112 | 25  | 3.43E-17  | 98   | 63   | 3.18E-05  |
| 17935 | 18  | 18  | 15  | 3   | 0.0017663 | 62   | 28   | 3.35E-06  |
| 17942 | 68  | 32  | 34  | 14  | 0.0007839 | 76   | 24   | 1.99E-10  |
| 17944 | 48  | 46  | 93  | 43  | 4.15E-07  | 125  | 88   | 3.13E-05  |
| 17948 | 294 | 219 | 311 | 180 | 1.03E-13  | 616  | 447  | 6.42E-19  |
| 17952 | 28  | 17  | 39  | 14  | 8.51E-05  | 57   | 26   | 1.12E-05  |
| 17954 | 414 | 399 | 428 | 334 | 1.30E-07  | 626  | 650  | 0.0007157 |
| 17962 | 298 | 205 | 366 | 230 | 4.65E-13  | 452  | 281  | 4.45E-21  |
| 17963 | 364 | 176 | 256 | 45  | 1.20E-43  | 305  | 190  | 1.19E-14  |
| 17966 | 8   | 22  | 12  | 46  | 5.69E-05  | 13   | 42   | 0.0017078 |
| 17992 | 355 | 179 | 401 | 142 | 5.16E-38  | 312  | 156  | 2.92E-22  |
| 17995 | 8   | 10  | 34  | 9   | 1.98E-05  | 25   | 9    | 0.000785  |
| 17996 | 26  | 202 | 55  | 221 | 2.95E-20  | 80   | 355  | 4.66E-30  |
| 18000 | 73  | 206 | 77  | 240 | 4.04E-16  | 181  | 374  | 1.93E-08  |
| 18007 | 139 | 97  | 172 | 84  | 3.97E-11  | 332  | 191  | 1.66E-18  |
| 18027 | 9   | 22  | 6   | 33  | 6.93E-05  | 12   | 45   | 0.0004197 |
| 18033 | 25  | 77  | 63  | 148 | 7.94E-07  | 58   | 139  | 2.09E-05  |
| 18037 | 257 | 406 | 381 | 597 | 1.71E-06  | 624  | 1058 | 2.01E-09  |
| 18043 | 13  | 97  | 20  | 172 | 4.16E-27  | 42   | 164  | 8.12E-13  |
| 18049 | 59  | 35  | 114 | 68  | 1.47E-05  | 79   | 46   | 2.83E-05  |
| 18050 | 1   | 138 | 10  | 280 | 3.41E-62  | 16   | 493  | 8.75E-102 |
| 18054 | 246 | 186 | 278 | 182 | 3.14E-09  | 345  | 304  | 6.40E-06  |
| 18058 | 182 | 193 | 352 | 309 | 0.0006835 | 430  | 401  | 1.98E-05  |
| 18064 | 184 | 153 | 255 | 158 | 7.35E-10  | 459  | 233  | 2.81E-31  |
| 18078 | 522 | 545 | 508 | 280 | 7.68E-24  | 975  | 1054 | 0.0007377 |
| 18087 | 420 | 378 | 556 | 483 | 8.50E-06  | 1094 | 831  | 3.85E-28  |
| 18088 | 126 | 145 | 248 | 192 | 4.64E-05  | 341  | 328  | 0.000606  |
| 18089 | 52  | 30  | 60  | 8   | 8.50E-13  | 81   | 55   | 0.0003801 |

|       |      |      |      |      |           |      |      |           |
|-------|------|------|------|------|-----------|------|------|-----------|
| 18093 | 28   | 43   | 21   | 65   | 3.06E-05  | 61   | 121  | 0.0035213 |
| 18097 | 65   | 19   | 38   | 17   | 0.0010094 | 82   | 36   | 4.22E-08  |
| 18100 | 101  | 192  | 171  | 440  | 5.59E-21  | 225  | 497  | 6.14E-13  |
| 18107 | 127  | 100  | 188  | 160  | 0.006074  | 214  | 193  | 0.0009681 |
| 18119 | 95   | 161  | 73   | 200  | 2.09E-11  | 175  | 319  | 6.51E-05  |
| 18130 | 24   | 126  | 41   | 133  | 3.98E-10  | 67   | 265  | 3.55E-20  |
| 18131 | 178  | 156  | 170  | 137  | 0.0023787 | 295  | 212  | 4.11E-10  |
| 18132 | 23   | 105  | 22   | 130  | 5.77E-17  | 54   | 181  | 1.57E-11  |
| 18137 | 205  | 138  | 274  | 192  | 1.38E-07  | 494  | 335  | 1.29E-18  |
| 18142 | 142  | 617  | 234  | 782  | 2.07E-54  | 477  | 1450 | 5.90E-71  |
| 18143 | 19   | 107  | 46   | 174  | 3.09E-15  | 46   | 369  | 5.25E-49  |
| 18149 | 118  | 43   | 196  | 79   | 1.43E-16  | 279  | 65   | 1.52E-44  |
| 18153 | 1078 | 1172 | 1524 | 1574 | 0.0039552 | 2476 | 1990 | 3.45E-50  |
| 18154 | 27   | 12   | 34   | 18   | 0.0078323 | 42   | 22   | 0.0009134 |
| 18160 | 120  | 297  | 207  | 351  | 6.49E-06  | 397  | 740  | 1.23E-10  |
| 18161 | 74   | 36   | 92   | 19   | 3.43E-15  | 187  | 43   | 1.74E-30  |
| 18175 | 151  | 143  | 127  | 83   | 7.31E-05  | 284  | 285  | 0.0078096 |
| 18191 | 14   | 40   | 13   | 46   | 0.0001213 | 30   | 111  | 1.29E-08  |
| 18195 | 55   | 32   | 43   | 12   | 2.21E-06  | 54   | 27   | 7.04E-05  |
| 18199 | 14   | 89   | 20   | 61   | 7.55E-05  | 29   | 174  | 6.11E-20  |
| 18201 | 63   | 78   | 136  | 73   | 1.00E-07  | 166  | 124  | 1.11E-05  |
| 18206 | 322  | 212  | 278  | 99   | 1.11E-26  | 423  | 260  | 2.90E-20  |
| 18208 | 0    | 17   | 2    | 25   | 1.83E-05  | 13   | 48   | 0.0002479 |
| 18219 | 71   | 37   | 94   | 18   | 3.26E-16  | 132  | 46   | 1.05E-15  |
| 18230 | 22   | 127  | 36   | 147  | 4.92E-14  | 54   | 204  | 6.11E-15  |
| 18248 | 80   | 52   | 80   | 38   | 4.55E-06  | 99   | 60   | 6.42E-06  |
| 18265 | 288  | 254  | 392  | 222  | 9.92E-18  | 508  | 318  | 4.10E-23  |
| 18267 | 188  | 164  | 150  | 88   | 4.52E-07  | 282  | 283  | 0.0076287 |
| 18279 | 82   | 64   | 127  | 20   | 1.00E-23  | 126  | 80   | 1.50E-06  |
| 18285 | 18   | 107  | 22   | 63   | 0.0001168 | 47   | 222  | 1.76E-20  |
| 18286 | 58   | 152  | 49   | 147  | 6.34E-10  | 41   | 159  | 1.97E-12  |
| 18290 | 38   | 19   | 67   | 14   | 2.81E-11  | 75   | 55   | 0.0025698 |
| 18299 | 91   | 57   | 96   | 33   | 2.22E-10  | 119  | 91   | 0.0003752 |
| 18301 | 68   | 43   | 43   | 18   | 0.0002553 | 43   | 19   | 9.35E-05  |
| 18309 | 44   | 106  | 49   | 102  | 0.0005673 | 115  | 258  | 1.19E-07  |
| 18314 | 28   | 94   | 54   | 152  | 2.68E-09  | 76   | 256  | 6.04E-16  |
| 18317 | 15   | 65   | 18   | 72   | 2.08E-07  | 21   | 103  | 1.47E-10  |
| 18319 | 43   | 42   | 62   | 28   | 2.85E-05  | 74   | 51   | 0.0011049 |
| 18322 | 21   | 101  | 20   | 111  | 4.68E-14  | 68   | 208  | 1.46E-11  |
| 18331 | 106  | 102  | 125  | 90   | 0.0007781 | 206  | 164  | 1.31E-05  |
| 18334 | 265  | 243  | 255  | 163  | 4.28E-09  | 506  | 327  | 2.10E-21  |
| 18343 | 20   | 34   | 5    | 67   | 2.39E-13  | 47   | 97   | 0.0054584 |
| 18358 | 107  | 63   | 106  | 37   | 3.47E-11  | 125  | 64   | 1.79E-09  |
| 18367 | 172  | 85   | 200  | 64   | 7.69E-22  | 234  | 147  | 2.66E-11  |
| 18399 | 507  | 537  | 729  | 568  | 4.48E-12  | 1020 | 900  | 1.02E-14  |
| 18401 | 84   | 91   | 75   | 42   | 0.0001837 | 131  | 118  | 0.0088797 |
| 18402 | 89   | 70   | 148  | 40   | 3.28E-19  | 140  | 106  | 8.42E-05  |
| 18404 | 38   | 150  | 45   | 146  | 7.88E-11  | 48   | 321  | 2.85E-38  |
| 18410 | 248  | 258  | 347  | 247  | 9.36E-09  | 327  | 329  | 0.0046378 |
| 18422 | 28   | 15   | 19   | 3    | 0.0001546 | 28   | 8    | 6.44E-05  |
| 18429 | 4    | 27   | 10   | 76   | 5.04E-12  | 5    | 41   | 1.61E-06  |
| 18434 | 16   | 81   | 11   | 53   | 1.04E-06  | 47   | 216  | 1.50E-19  |
| 18435 | 444  | 438  | 573  | 254  | 1.47E-39  | 800  | 673  | 1.57E-14  |
| 18436 | 83   | 94   | 109  | 82   | 0.0045514 | 219  | 211  | 0.0065016 |
| 18449 | 7    | 5    | 23   | 7    | 0.0013945 | 22   | 5    | 0.0001202 |
| 18451 | 291  | 285  | 367  | 290  | 2.11E-06  | 506  | 468  | 2.04E-06  |
| 18453 | 330  | 98   | 348  | 81   | 7.63E-49  | 561  | 159  | 1.47E-75  |
| 18488 | 122  | 51   | 130  | 45   | 1.44E-13  | 228  | 155  | 2.58E-09  |
| 18492 | 742  | 425  | 715  | 288  | 2.60E-56  | 969  | 575  | 6.95E-48  |
| 18493 | 473  | 265  | 549  | 199  | 6.66E-50  | 763  | 430  | 3.35E-42  |
| 18497 | 136  | 184  | 241  | 193  | 0.000206  | 313  | 267  | 3.31E-06  |
| 18514 | 12   | 91   | 14   | 108  | 1.12E-16  | 41   | 191  | 1.22E-17  |
| 18519 | 107  | 205  | 187  | 279  | 0.0052982 | 340  | 516  | 0.007253  |
| 18529 | 237  | 1701 | 283  | 1263 | 2.49E-120 | 435  | 3540 | 0         |
| 18537 | 54   | 57   | 46   | 17   | 3.59E-05  | 112  | 88   | 0.0010201 |
| 18550 | 2    | 8    | 0    | 22   | 1.06E-06  | 4    | 22   | 0.002592  |



|       |     |     |      |      |           |      |      |           |
|-------|-----|-----|------|------|-----------|------|------|-----------|
| 18551 | 109 | 98  | 121  | 93   | 0.0039294 | 222  | 196  | 0.0003191 |
| 18553 | 142 | 83  | 109  | 60   | 3.13E-06  | 152  | 130  | 0.0014466 |
| 18557 | 181 | 151 | 196  | 107  | 3.26E-10  | 224  | 200  | 0.0005048 |
| 18559 | 81  | 39  | 99   | 12   | 4.12E-21  | 136  | 72   | 1.16E-09  |
| 18577 | 245 | 113 | 204  | 110  | 7.12E-11  | 251  | 157  | 3.81E-12  |
| 18582 | 9   | 111 | 1    | 83   | 1.45E-21  | 31   | 211  | 7.17E-26  |
| 18587 | 168 | 687 | 309  | 1184 | 2.18E-96  | 576  | 2368 | 8.76E-176 |
| 18622 | 9   | 8   | 34   | 8    | 6.95E-06  | 32   | 10   | 3.37E-05  |
| 18625 | 88  | 79  | 159  | 91   | 7.80E-08  | 186  | 146  | 1.98E-05  |
| 18627 | 35  | 94  | 63   | 147  | 1.07E-06  | 70   | 192  | 5.15E-09  |
| 18630 | 266 | 159 | 430  | 228  | 5.01E-22  | 397  | 205  | 1.45E-26  |
| 18633 | 156 | 103 | 188  | 92   | 6.64E-12  | 209  | 101  | 3.60E-16  |
| 18635 | 5   | 5   | 16   | 4    | 0.0029925 | 9    | 1    | 0.0068295 |
| 18638 | 435 | 122 | 623  | 173  | 1.04E-74  | 404  | 72   | 3.65E-75  |
| 18641 | 318 | 136 | 487  | 171  | 2.85E-46  | 769  | 215  | 3.72E-104 |
| 18645 | 770 | 888 | 1477 | 1340 | 6.33E-10  | 1626 | 1230 | 1.54E-41  |
| 18653 | 83  | 188 | 144  | 331  | 6.33E-13  | 188  | 389  | 1.04E-08  |
| 18654 | 146 | 304 | 213  | 421  | 3.96E-11  | 308  | 520  | 3.57E-05  |
| 18664 | 2   | 21  | 0    | 28   | 4.07E-08  | 5    | 25   | 0.0026146 |
| 18666 | 57  | 132 | 79   | 224  | 2.81E-13  | 108  | 242  | 2.79E-07  |
| 18770 | 19  | 70  | 25   | 102  | 3.23E-10  | 45   | 156  | 1.30E-10  |
| 18774 | 100 | 66  | 134  | 105  | 0.0034943 | 217  | 99   | 2.86E-18  |
| 18777 | 2   | 7   | 4    | 21   | 0.0020765 | 7    | 45   | 3.72E-06  |
| 18782 | 180 | 271 | 250  | 665  | 6.69E-33  | 426  | 804  | 5.94E-12  |
| 18795 | 22  | 50  | 19   | 55   | 0.0002642 | 40   | 100  | 0.0001632 |
| 18865 | 113 | 234 | 185  | 396  | 5.81E-13  | 276  | 517  | 6.18E-08  |
| 18881 | 36  | 4   | 34   | 12   | 0.0002838 | 37   | 7    | 1.10E-07  |
| 18885 | 233 | 180 | 39   | 20   | 0.0037129 | 48   | 18   | 4.64E-06  |
| 18895 | 7   | 15  | 7    | 26   | 0.0044595 | 7    | 26   | 0.0079116 |
| 18896 | 70  | 20  | 98   | 30   | 7.04E-12  | 67   | 14   | 1.48E-12  |
| 18897 | 184 | 77  | 275  | 94   | 1.33E-27  | 346  | 97   | 1.01E-47  |
| 18904 | 130 | 456 | 72   | 252  | 1.46E-19  | 199  | 464  | 5.51E-14  |
| 18909 | 247 | 251 | 408  | 322  | 5.18E-07  | 623  | 479  | 5.26E-16  |
| 18912 | 43  | 142 | 72   | 180  | 6.33E-09  | 97   | 234  | 2.51E-08  |
| 18913 | 97  | 203 | 197  | 373  | 7.50E-09  | 236  | 398  | 0.0003157 |
| 18915 | 293 | 199 | 361  | 242  | 6.88E-11  | 224  | 147  | 7.00E-10  |
| 18926 | 4   | 1   | 10   | 0    | 0.000483  | 16   | 1    | 2.19E-05  |
| 18929 | 41  | 117 | 65   | 177  | 3.73E-10  | 78   | 273  | 8.85E-18  |
| 18931 | 40  | 76  | 63   | 115  | 0.0026239 | 78   | 145  | 0.0055996 |
| 18935 | 21  | 149 | 43   | 322  | 2.76E-46  | 46   | 422  | 6.08E-60  |
| 18947 | 114 | 382 | 167  | 568  | 6.23E-41  | 329  | 990  | 3.76E-48  |
| 18954 | 108 | 120 | 195  | 165  | 0.0042935 | 284  | 229  | 5.87E-07  |
| 18968 | 58  | 44  | 106  | 78   | 0.0030459 | 121  | 83   | 2.07E-05  |
| 18981 | 63  | 47  | 128  | 76   | 4.30E-06  | 139  | 108  | 0.0001913 |
| 18982 | 390 | 953 | 394  | 719  | 4.62E-14  | 821  | 2013 | 3.49E-63  |
| 18984 | 75  | 57  | 66   | 22   | 7.84E-08  | 132  | 74   | 1.37E-08  |
| 18987 | 91  | 164 | 121  | 196  | 0.0027975 | 97   | 238  | 8.47E-09  |
| 18988 | 300 | 273 | 379  | 315  | 2.75E-05  | 483  | 353  | 7.55E-15  |
| 18991 | 87  | 36  | 76   | 38   | 1.93E-05  | 43   | 15   | 7.05E-06  |
| 18992 | 24  | 3   | 9    | 1    | 0.0079029 | 34   | 7    | 6.47E-07  |
| 18996 | 41  | 128 | 75   | 257  | 1.60E-19  | 110  | 342  | 1.52E-18  |
| 18999 | 104 | 51  | 76   | 37   | 1.14E-05  | 45   | 25   | 0.0010202 |
| 19003 | 267 | 173 | 432  | 248  | 8.98E-19  | 501  | 328  | 1.34E-20  |
| 19012 | 44  | 33  | 94   | 58   | 0.0001723 | 124  | 68   | 2.20E-08  |
| 19013 | 223 | 122 | 148  | 66   | 3.59E-11  | 275  | 229  | 4.48E-06  |
| 19014 | 8   | 15  | 16   | 0    | 4.95E-06  | 24   | 6    | 0.0001266 |
| 19020 | 18  | 76  | 27   | 113  | 2.11E-11  | 43   | 155  | 3.63E-11  |
| 19031 | 20  | 23  | 22   | 57   | 0.0009501 | 34   | 86   | 0.0004333 |
| 19033 | 57  | 31  | 75   | 33   | 2.50E-06  | 85   | 62   | 0.0011464 |
| 19035 | 35  | 26  | 61   | 34   | 0.0006352 | 81   | 51   | 0.0001015 |
| 19042 | 138 | 79  | 132  | 72   | 2.31E-07  | 254  | 198  | 4.65E-07  |
| 19045 | 59  | 105 | 76   | 196  | 3.63E-10  | 85   | 200  | 6.32E-07  |
| 19063 | 2   | 5   | 0    | 10   | 0.0023681 | 1    | 15   | 0.0016393 |
| 19065 | 38  | 126 | 32   | 164  | 5.76E-19  | 93   | 299  | 2.69E-17  |
| 19069 | 177 | 155 | 281  | 202  | 3.74E-07  | 361  | 249  | 2.03E-13  |
| 19070 | 62  | 163 | 148  | 302  | 3.83E-09  | 198  | 466  | 2.29E-14  |

|       |      |      |      |      |           |      |      |           |
|-------|------|------|------|------|-----------|------|------|-----------|
| 19076 | 430  | 448  | 371  | 304  | 1.49E-05  | 744  | 641  | 2.60E-12  |
| 19094 | 68   | 277  | 102  | 432  | 4.00E-40  | 44   | 189  | 3.32E-16  |
| 19097 | 371  | 109  | 389  | 180  | 1.33E-25  | 355  | 126  | 4.74E-39  |
| 19113 | 41   | 136  | 34   | 172  | 1.57E-19  | 92   | 270  | 1.42E-13  |
| 19122 | 174  | 717  | 361  | 1542 | 2.18E-140 | 565  | 1942 | 1.94E-114 |
| 19138 | 56   | 152  | 151  | 309  | 2.35E-09  | 196  | 425  | 1.06E-10  |
| 19142 | 355  | 667  | 435  | 800  | 6.61E-16  | 502  | 979  | 3.29E-16  |
| 19145 | 1219 | 2589 | 1367 | 2724 | 1.36E-65  | 2660 | 4733 | 5.80E-48  |
| 19158 | 82   | 46   | 143  | 106  | 0.0007303 | 177  | 65   | 1.33E-19  |
| 19161 | 14   | 57   | 43   | 118  | 3.03E-07  | 47   | 114  | 9.31E-05  |
| 19168 | 27   | 265  | 37   | 582  | 1.17E-111 | 91   | 651  | 1.77E-79  |
| 19169 | 262  | 372  | 463  | 712  | 7.43E-07  | 540  | 849  | 4.47E-05  |
| 19173 | 10   | 146  | 24   | 312  | 4.75E-57  | 42   | 359  | 1.84E-49  |
| 19182 | 117  | 94   | 214  | 151  | 4.58E-06  | 220  | 91   | 5.27E-21  |
| 19186 | 5    | 38   | 12   | 57   | 6.51E-07  | 10   | 40   | 0.0005021 |
| 19187 | 70   | 49   | 92   | 69   | 0.0089328 | 183  | 136  | 3.40E-06  |
| 19188 | 1    | 20   | 5    | 20   | 0.0082813 | 3    | 28   | 4.08E-05  |
| 19197 | 72   | 116  | 115  | 185  | 0.0044995 | 106  | 313  | 1.06E-15  |
| 19209 | 113  | 62   | 195  | 39   | 4.04E-31  | 226  | 121  | 7.24E-15  |
| 19210 | 136  | 55   | 170  | 64   | 8.48E-16  | 237  | 101  | 1.62E-21  |
| 19211 | 45   | 19   | 76   | 4    | 8.62E-21  | 44   | 22   | 0.0002854 |
| 19213 | 64   | 19   | 34   | 8    | 6.95E-06  | 54   | 13   | 1.53E-09  |
| 19215 | 97   | 66   | 151  | 68   | 3.78E-11  | 175  | 130  | 6.19E-06  |
| 19223 | 355  | 25   | 385  | 35   | 1.14E-86  | 559  | 19   | 7.49E-168 |
| 19225 | 117  | 73   | 160  | 61   | 1.10E-14  | 224  | 124  | 6.84E-14  |
| 19227 | 136  | 80   | 253  | 30   | 3.10E-52  | 330  | 110  | 5.78E-39  |
| 19228 | 37   | 23   | 86   | 7    | 3.98E-21  | 65   | 34   | 2.59E-05  |
| 19229 | 109  | 66   | 182  | 127  | 1.74E-05  | 167  | 98   | 1.30E-09  |
| 19230 | 45   | 98   | 31   | 163  | 3.43E-19  | 68   | 168  | 1.42E-06  |
| 19231 | 387  | 992  | 613  | 1800 | 7.93E-102 | 1145 | 2817 | 2.07E-88  |
| 19233 | 92   | 88   | 155  | 39   | 1.99E-21  | 200  | 165  | 7.34E-05  |
| 19235 | 76   | 397  | 158  | 762  | 1.36E-78  | 236  | 1067 | 6.14E-89  |
| 19238 | 2    | 10   | 1    | 21   | 3.72E-05  | 2    | 30   | 2.98E-06  |
| 19241 | 54   | 148  | 121  | 191  | 0.0063632 | 181  | 361  | 2.43E-07  |
| 19242 | 1    | 1    | 8    | 0    | 0.0022242 | 12   | 2    | 0.0021043 |
| 19255 | 23   | 32   | 36   | 97   | 4.86E-06  | 51   | 121  | 0.0001116 |
| 19269 | 153  | 412  | 200  | 501  | 1.62E-22  | 338  | 858  | 4.32E-30  |
| 19272 | 149  | 138  | 262  | 178  | 5.76E-08  | 261  | 179  | 3.31E-10  |
| 19276 | 166  | 38   | 301  | 93   | 2.09E-33  | 194  | 13   | 2.22E-52  |
| 19278 | 1942 | 1750 | 1043 | 1009 | 0.0001284 | 1820 | 1783 | 9.02E-14  |
| 19284 | 61   | 42   | 89   | 42   | 1.05E-06  | 124  | 73   | 1.80E-07  |
| 19296 | 106  | 95   | 139  | 79   | 4.06E-07  | 193  | 99   | 7.78E-14  |
| 19305 | 98   | 172  | 133  | 298  | 3.57E-11  | 206  | 389  | 1.60E-06  |
| 19310 | 17   | 8    | 33   | 7    | 3.95E-06  | 14   | 1    | 9.91E-05  |
| 19312 | 202  | 477  | 311  | 657  | 5.89E-20  | 469  | 774  | 2.76E-06  |
| 19314 | 125  | 142  | 275  | 230  | 0.0004194 | 399  | 243  | 1.64E-19  |
| 19326 | 50   | 39   | 95   | 22   | 2.01E-14  | 134  | 78   | 3.50E-08  |
| 19358 | 1    | 10   | 0    | 25   | 3.06E-07  | 2    | 21   | 0.0004479 |
| 19361 | 123  | 176  | 109  | 192  | 0.0003262 | 207  | 356  | 0.000305  |
| 19474 | 120  | 149  | 145  | 84   | 3.98E-07  | 299  | 248  | 1.33E-06  |
| 19481 | 58   | 19   | 51   | 22   | 8.31E-05  | 113  | 39   | 7.04E-14  |
| 19493 | 7    | 153  | 17   | 196  | 6.90E-35  | 41   | 222  | 5.23E-23  |
| 19496 | 56   | 17   | 54   | 16   | 2.30E-07  | 139  | 41   | 3.00E-19  |
| 19502 | 11   | 5    | 47   | 0    | 2.60E-16  | 23   | 3    | 3.93E-06  |
| 19509 | 101  | 27   | 120  | 26   | 8.38E-19  | 162  | 40   | 2.20E-25  |
| 19511 | 43   | 8    | 53   | 7    | 2.81E-11  | 25   | 5    | 2.01E-05  |
| 19512 | 29   | 10   | 27   | 0    | 1.11E-09  | 59   | 20   | 7.58E-08  |
| 19516 | 52   | 214  | 46   | 190  | 5.19E-18  | 124  | 364  | 6.31E-18  |
| 19522 | 127  | 93   | 141  | 46   | 1.33E-15  | 149  | 101  | 1.51E-06  |
| 19526 | 24   | 59   | 38   | 80   | 0.0016481 | 40   | 117  | 1.61E-06  |
| 19528 | 116  | 251  | 59   | 114  | 0.0010043 | 158  | 376  | 3.12E-12  |
| 19529 | 152  | 75   | 108  | 36   | 6.31E-12  | 149  | 60   | 4.12E-15  |
| 19536 | 37   | 32   | 27   | 5    | 1.85E-05  | 67   | 46   | 0.0016708 |
| 19537 | 120  | 70   | 112  | 31   | 1.10E-14  | 143  | 99   | 5.10E-06  |
| 19538 | 253  | 167  | 335  | 168  | 2.01E-19  | 447  | 289  | 5.08E-19  |
| 19542 | 223  | 94   | 296  | 86   | 7.19E-35  | 344  | 166  | 9.73E-26  |

|       |      |      |      |      |           |      |      |           |
|-------|------|------|------|------|-----------|------|------|-----------|
| 19545 | 62   | 42   | 81   | 47   | 0.0001777 | 135  | 34   | 4.52E-21  |
| 19548 | 8    | 58   | 5    | 52   | 1.41E-09  | 10   | 96   | 5.56E-15  |
| 19550 | 30   | 112  | 35   | 101  | 6.97E-07  | 68   | 173  | 3.41E-07  |
| 19556 | 375  | 239  | 423  | 227  | 3.04E-21  | 414  | 277  | 2.07E-16  |
| 19557 | 71   | 47   | 40   | 17   | 0.0004517 | 84   | 53   | 6.89E-05  |
| 19569 | 15   | 125  | 17   | 116  | 1.27E-16  | 30   | 250  | 1.95E-34  |
| 19578 | 101  | 87   | 158  | 66   | 4.94E-13  | 192  | 167  | 0.0005391 |
| 19583 | 17   | 77   | 18   | 55   | 0.0001441 | 28   | 168  | 3.69E-19  |
| 19594 | 50   | 97   | 91   | 187  | 3.22E-06  | 100  | 224  | 9.86E-07  |
| 19598 | 78   | 162  | 118  | 328  | 3.01E-18  | 194  | 417  | 2.89E-10  |
| 19604 | 50   | 117  | 75   | 131  | 0.0033171 | 118  | 206  | 0.0042984 |
| 19608 | 19   | 23   | 55   | 32   | 0.0024279 | 85   | 28   | 3.07E-11  |
| 19610 | 193  | 177  | 301  | 196  | 5.68E-10  | 400  | 335  | 4.38E-08  |
| 19611 | 7    | 18   | 6    | 35   | 2.54E-05  | 16   | 70   | 6.39E-07  |
| 19613 | 55   | 139  | 48   | 127  | 2.78E-07  | 91   | 268  | 1.17E-13  |
| 19616 | 90   | 45   | 106  | 51   | 1.42E-07  | 125  | 63   | 1.02E-09  |
| 19623 | 50   | 39   | 49   | 26   | 0.0015942 | 89   | 51   | 5.27E-06  |
| 19630 | 210  | 59   | 270  | 67   | 1.38E-36  | 331  | 84   | 2.24E-49  |
| 19631 | 61   | 61   | 121  | 57   | 1.09E-08  | 111  | 94   | 0.0048845 |
| 19645 | 87   | 47   | 127  | 87   | 0.0002037 | 86   | 60   | 0.0004401 |
| 19662 | 59   | 69   | 63   | 41   | 0.0056584 | 103  | 79   | 0.000986  |
| 19663 | 77   | 46   | 99   | 42   | 2.28E-08  | 116  | 53   | 2.63E-10  |
| 19665 | 0    | 24   | 0    | 47   | 1.71E-13  | 1    | 30   | 4.44E-07  |
| 19666 | 0    | 19   | 0    | 11   | 0.0012317 | 0    | 20   | 1.04E-05  |
| 19673 | 129  | 291  | 161  | 346  | 1.28E-11  | 218  | 421  | 1.67E-07  |
| 19678 | 168  | 101  | 174  | 57   | 1.05E-18  | 226  | 143  | 7.82E-11  |
| 19682 | 204  | 140  | 309  | 233  | 1.32E-06  | 410  | 180  | 6.58E-35  |
| 19689 | 30   | 19   | 29   | 12   | 0.0025205 | 63   | 25   | 2.64E-07  |
| 19691 | 287  | 192  | 275  | 104  | 1.55E-24  | 150  | 123  | 0.0004945 |
| 19714 | 98   | 66   | 110  | 31   | 3.02E-14  | 173  | 114  | 7.02E-08  |
| 19736 | 0    | 4    | 0    | 11   | 0.0012317 | 1    | 19   | 0.0001668 |
| 19766 | 68   | 134  | 89   | 254  | 4.27E-15  | 157  | 296  | 3.04E-05  |
| 19781 | 43   | 14   | 85   | 14   | 5.09E-16  | 108  | 38   | 5.34E-13  |
| 19783 | 85   | 209  | 97   | 293  | 1.14E-18  | 179  | 466  | 5.50E-18  |
| 19824 | 169  | 27   | 190  | 19   | 3.70E-42  | 129  | 15   | 5.41E-30  |
| 19826 | 102  | 42   | 123  | 53   | 4.96E-10  | 180  | 147  | 0.0001162 |
| 19828 | 52   | 28   | 50   | 7    | 1.71E-10  | 33   | 19   | 0.0074114 |
| 19841 | 295  | 904  | 492  | 1345 | 4.97E-68  | 787  | 2294 | 3.75E-103 |
| 19847 | 27   | 74   | 37   | 108  | 2.56E-07  | 78   | 145  | 0.0055996 |
| 19865 | 112  | 16   | 115  | 6    | 7.99E-31  | 132  | 20   | 1.15E-27  |
| 19866 | 300  | 177  | 334  | 119  | 1.29E-31  | 386  | 169  | 5.04E-33  |
| 19881 | 37   | 24   | 55   | 15   | 5.47E-08  | 74   | 27   | 4.60E-09  |
| 19882 | 1598 | 866  | 1201 | 362  | 1.29E-131 | 1942 | 935  | 2.66E-138 |
| 19909 | 14   | 2    | 16   | 1    | 7.06E-05  | 14   | 2    | 0.0005515 |
| 19910 | 14   | 138  | 15   | 182  | 4.10E-33  | 43   | 298  | 1.68E-36  |
| 19924 | 145  | 50   | 121  | 44   | 3.78E-12  | 179  | 74   | 2.23E-17  |
| 19933 | 153  | 362  | 271  | 595  | 6.63E-20  | 440  | 764  | 4.68E-08  |
| 19934 | 1030 | 397  | 999  | 288  | 1.22E-114 | 1526 | 474  | 2.53E-186 |
| 19941 | 163  | 74   | 155  | 52   | 1.74E-16  | 247  | 143  | 5.16E-14  |
| 19942 | 93   | 72   | 125  | 38   | 7.04E-15  | 150  | 122  | 0.0003834 |
| 19963 | 295  | 260  | 309  | 265  | 0.0005906 | 729  | 652  | 3.01E-10  |
| 19976 | 71   | 164  | 19   | 107  | 1.16E-13  | 86   | 299  | 2.80E-19  |
| 19977 | 101  | 349  | 141  | 272  | 3.32E-07  | 195  | 926  | 3.09E-81  |
| 19982 | 163  | 1055 | 225  | 995  | 1.91E-94  | 357  | 1874 | 1.01E-178 |
| 19986 | 15   | 7    | 30   | 6    | 6.90E-06  | 32   | 14   | 0.0008741 |
| 19990 | 161  | 60   | 178  | 41   | 4.99E-26  | 254  | 101  | 3.82E-25  |
| 20005 | 19   | 106  | 19   | 75   | 1.28E-07  | 68   | 235  | 3.14E-15  |
| 20009 | 829  | 828  | 958  | 714  | 2.44E-18  | 1142 | 994  | 2.41E-17  |
| 20031 | 66   | 27   | 127  | 11   | 5.03E-30  | 124  | 49   | 4.99E-13  |
| 20032 | 504  | 660  | 633  | 600  | 0.0009222 | 1092 | 1113 | 1.00E-06  |
| 20047 | 3    | 11   | 0    | 10   | 0.0023681 | 2    | 15   | 0.0063446 |
| 20049 | 263  | 240  | 206  | 119  | 1.39E-09  | 356  | 252  | 2.14E-12  |
| 20063 | 118  | 161  | 93   | 158  | 0.0023658 | 172  | 286  | 0.0035262 |
| 20067 | 401  | 380  | 528  | 305  | 2.72E-22  | 627  | 609  | 6.77E-06  |
| 20068 | 75   | 137  | 128  | 263  | 2.78E-08  | 165  | 331  | 6.03E-07  |
| 20076 | 34   | 54   | 29   | 64   | 0.0033914 | 44   | 114  | 2.67E-05  |

|       |     |     |      |      |           |      |      |           |
|-------|-----|-----|------|------|-----------|------|------|-----------|
| 20101 | 0   | 9   | 0    | 12   | 0.0006424 | 0    | 12   | 0.0018112 |
| 20103 | 155 | 181 | 170  | 109  | 1.84E-06  | 261  | 245  | 0.0010765 |
| 20120 | 182 | 77  | 177  | 139  | 0.000859  | 332  | 191  | 1.66E-18  |
| 20122 | 3   | 24  | 2    | 51   | 5.42E-12  | 14   | 80   | 1.89E-09  |
| 20123 | 12  | 25  | 24   | 57   | 0.0024422 | 21   | 52   | 0.0090782 |
| 20124 | 4   | 52  | 6    | 126  | 6.62E-27  | 19   | 157  | 6.08E-22  |
| 20125 | 247 | 446 | 331  | 626  | 5.54E-14  | 341  | 608  | 1.63E-07  |
| 20130 | 53  | 46  | 70   | 42   | 0.0008517 | 129  | 92   | 3.26E-05  |
| 20132 | 192 | 173 | 262  | 142  | 1.87E-13  | 329  | 268  | 1.51E-07  |
| 20136 | 52  | 56  | 81   | 34   | 2.86E-07  | 94   | 76   | 0.004236  |
| 20149 | 220 | 137 | 238  | 60   | 7.78E-32  | 314  | 216  | 6.42E-12  |
| 20153 | 120 | 102 | 232  | 184  | 0.0001837 | 280  | 241  | 1.80E-05  |
| 20159 | 38  | 133 | 52   | 246  | 4.98E-26  | 110  | 546  | 1.00E-50  |
| 20164 | 417 | 343 | 533  | 414  | 2.75E-09  | 642  | 638  | 3.07E-05  |
| 20165 | 140 | 356 | 263  | 642  | 4.62E-27  | 293  | 735  | 2.06E-25  |
| 20166 | 0   | 42  | 10   | 93   | 8.50E-16  | 2    | 141  | 3.18E-33  |
| 20178 | 204 | 135 | 279  | 155  | 1.51E-13  | 421  | 240  | 1.67E-23  |
| 20191 | 169 | 81  | 237  | 135  | 3.88E-11  | 352  | 83   | 3.04E-55  |
| 20196 | 782 | 322 | 931  | 234  | 9.27E-121 | 1092 | 359  | 9.16E-127 |
| 20201 | 442 | 361 | 507  | 492  | 0.009279  | 773  | 570  | 2.42E-22  |
| 20202 | 61  | 32  | 108  | 17   | 2.10E-20  | 118  | 49   | 7.35E-12  |
| 20206 | 57  | 49  | 85   | 14   | 5.09E-16  | 108  | 91   | 0.0052953 |
| 20209 | 175 | 331 | 264  | 411  | 9.53E-05  | 399  | 777  | 4.32E-13  |
| 20229 | 240 | 402 | 344  | 578  | 1.51E-08  | 502  | 830  | 1.02E-06  |
| 20234 | 264 | 173 | 350  | 269  | 8.23E-07  | 550  | 382  | 3.05E-19  |
| 20255 | 52  | 337 | 130  | 498  | 1.73E-41  | 136  | 887  | 2.91E-101 |
| 20257 | 718 | 633 | 1190 | 1077 | 2.08E-08  | 1621 | 1339 | 5.13E-30  |
| 20258 | 51  | 20  | 101  | 46   | 7.83E-08  | 103  | 27   | 4.98E-16  |
| 20291 | 4   | 28  | 1    | 44   | 2.37E-11  | 10   | 46   | 3.93E-05  |
| 20292 | 35  | 75  | 71   | 143  | 8.59E-05  | 54   | 129  | 5.21E-05  |
| 20296 | 90  | 203 | 147  | 362  | 4.32E-16  | 247  | 564  | 6.80E-16  |
| 20298 | 79  | 52  | 125  | 72   | 2.81E-06  | 159  | 93   | 2.49E-09  |
| 20303 | 52  | 43  | 49   | 22   | 0.0001831 | 58   | 29   | 3.23E-05  |
| 20306 | 42  | 21  | 54   | 27   | 0.0003217 | 52   | 29   | 0.0004505 |
| 20307 | 62  | 30  | 37   | 15   | 0.0004232 | 57   | 32   | 0.0002426 |
| 20313 | 88  | 57  | 166  | 68   | 6.97E-14  | 145  | 126  | 0.0026779 |
| 20314 | 6   | 10  | 1    | 37   | 1.76E-09  | 7    | 33   | 0.0006253 |
| 20320 | 132 | 95  | 140  | 110  | 0.0034627 | 208  | 151  | 2.89E-07  |
| 20333 | 126 | 112 | 146  | 50   | 3.45E-15  | 151  | 108  | 7.90E-06  |
| 20336 | 172 | 42  | 228  | 48   | 4.57E-35  | 272  | 50   | 3.05E-50  |
| 20349 | 20  | 25  | 27   | 4    | 4.61E-06  | 40   | 19   | 0.0003357 |
| 20354 | 519 | 521 | 631  | 162  | 5.62E-81  | 954  | 779  | 3.43E-19  |
| 20355 | 10  | 59  | 2    | 70   | 8.78E-17  | 25   | 75   | 7.50E-05  |
| 20369 | 20  | 53  | 18   | 73   | 1.35E-07  | 47   | 139  | 1.12E-07  |
| 20373 | 29  | 109 | 31   | 91   | 1.77E-06  | 62   | 188  | 1.81E-10  |
| 20382 | 71  | 56  | 103  | 48   | 1.16E-07  | 117  | 94   | 0.0013806 |
| 20384 | 71  | 35  | 70   | 30   | 2.80E-06  | 93   | 50   | 7.59E-07  |
| 20385 | 206 | 165 | 247  | 210  | 0.0016523 | 290  | 223  | 3.12E-08  |
| 20389 | 54  | 44  | 104  | 78   | 0.0046822 | 138  | 98   | 1.38E-05  |
| 20394 | 179 | 283 | 365  | 706  | 1.21E-16  | 714  | 1182 | 4.72E-09  |
| 20401 | 88  | 142 | 136  | 237  | 9.43E-05  | 165  | 304  | 6.20E-05  |
| 20402 | 9   | 52  | 31   | 95   | 5.97E-07  | 26   | 102  | 1.82E-08  |
| 20403 | 91  | 139 | 70   | 173  | 1.64E-08  | 153  | 277  | 0.000264  |
| 20406 | 181 | 335 | 242  | 461  | 6.53E-11  | 382  | 692  | 5.97E-09  |
| 20407 | 110 | 115 | 144  | 118  | 0.007641  | 291  | 249  | 9.39E-06  |
| 20411 | 105 | 83  | 163  | 100  | 6.40E-07  | 164  | 150  | 0.0053151 |
| 20412 | 113 | 463 | 171  | 716  | 8.09E-65  | 276  | 1126 | 8.07E-84  |
| 20413 | 64  | 386 | 101  | 711  | 1.13E-96  | 162  | 734  | 9.31E-62  |
| 20414 | 238 | 595 | 298  | 564  | 9.70E-13  | 519  | 1096 | 1.64E-23  |
| 20422 | 38  | 155 | 68   | 217  | 2.56E-15  | 69   | 295  | 2.87E-24  |
| 20423 | 4   | 39  | 0    | 65   | 2.73E-18  | 11   | 85   | 6.37E-12  |
| 20428 | 257 | 194 | 438  | 250  | 3.47E-19  | 553  | 341  | 7.76E-26  |
| 20437 | 126 | 217 | 143  | 429  | 2.64E-26  | 188  | 419  | 2.09E-11  |
| 20442 | 137 | 127 | 228  | 166  | 8.21E-06  | 310  | 204  | 4.09E-13  |
| 20449 | 116 | 65  | 85   | 40   | 1.54E-06  | 136  | 39   | 3.29E-19  |
| 20453 | 41  | 104 | 45   | 131  | 1.38E-08  | 109  | 197  | 0.0022494 |

|       |     |     |     |     |           |     |      |           |
|-------|-----|-----|-----|-----|-----------|-----|------|-----------|
| 20457 | 81  | 96  | 202 | 144 | 1.19E-05  | 208 | 179  | 0.0002214 |
| 20461 | 32  | 239 | 84  | 381 | 4.78E-38  | 69  | 410  | 1.20E-44  |
| 20464 | 55  | 51  | 108 | 64  | 2.30E-05  | 123 | 87   | 3.79E-05  |
| 20471 | 23  | 90  | 42  | 127 | 7.03E-09  | 50  | 210  | 2.03E-17  |
| 20475 | 135 | 272 | 257 | 450 | 4.16E-08  | 354 | 615  | 9.98E-07  |
| 20477 | 105 | 104 | 148 | 86  | 3.64E-07  | 239 | 159  | 3.94E-10  |
| 20484 | 54  | 92  | 37  | 135 | 1.10E-11  | 139 | 297  | 1.30E-07  |
| 20490 | 4   | 80  | 0   | 82  | 4.83E-23  | 5   | 143  | 6.59E-30  |
| 20491 | 241 | 541 | 363 | 563 | 6.19E-06  | 471 | 988  | 6.96E-21  |
| 20499 | 0   | 26  | 0   | 70  | 1.05E-19  | 6   | 45   | 7.30E-07  |
| 20509 | 262 | 177 | 400 | 195 | 4.23E-24  | 423 | 228  | 4.18E-26  |
| 20510 | 275 | 247 | 327 | 161 | 1.27E-19  | 497 | 396  | 1.33E-11  |
| 20518 | 58  | 233 | 124 | 301 | 2.55E-13  | 163 | 537  | 6.49E-31  |
| 20521 | 180 | 285 | 151 | 260 | 5.94E-05  | 384 | 768  | 3.17E-14  |
| 20546 | 163 | 506 | 246 | 871 | 5.51E-65  | 296 | 1131 | 9.01E-78  |
| 20553 | 66  | 42  | 84  | 25  | 1.18E-10  | 107 | 72   | 4.26E-05  |
| 20559 | 94  | 491 | 140 | 774 | 2.92E-89  | 206 | 1282 | 6.10E-141 |
| 20564 | 52  | 16  | 48  | 30  | 0.0088864 | 68  | 20   | 4.34E-10  |
| 20567 | 192 | 382 | 292 | 710 | 1.94E-29  | 372 | 790  | 1.25E-17  |
| 20568 | 0   | 9   | 0   | 14  | 0.000176  | 0   | 23   | 1.64E-06  |
| 20572 | 377 | 610 | 464 | 855 | 5.69E-17  | 568 | 1094 | 4.50E-17  |
| 20574 | 123 | 225 | 228 | 383 | 4.33E-06  | 277 | 542  | 1.03E-09  |
| 20575 | 40  | 32  | 36  | 6   | 1.93E-07  | 32  | 9    | 1.29E-05  |
| 20578 | 40  | 12  | 78  | 33  | 5.19E-07  | 75  | 15   | 4.78E-14  |
| 20580 | 349 | 224 | 457 | 248 | 3.11E-22  | 518 | 352  | 2.80E-19  |
| 20584 | 124 | 42  | 131 | 105 | 0.0073411 | 161 | 42   | 3.88E-24  |
| 20594 | 0   | 12  | 0   | 20  | 3.79E-06  | 1   | 27   | 2.67E-06  |
| 20603 | 29  | 74  | 11  | 64  | 7.96E-09  | 31  | 168  | 7.15E-18  |
| 20604 | 39  | 139 | 71  | 179 | 5.44E-09  | 100 | 223  | 9.80E-07  |
| 20605 | 89  | 133 | 107 | 174 | 0.0040872 | 128 | 221  | 0.0042417 |
| 20613 | 607 | 310 | 874 | 389 | 5.61E-59  | 868 | 510  | 5.47E-44  |
| 20615 | 96  | 67  | 138 | 71  | 1.98E-08  | 189 | 74   | 2.49E-19  |
| 20617 | 90  | 214 | 106 | 221 | 2.15E-07  | 170 | 476  | 4.72E-21  |
| 20785 | 16  | 7   | 45  | 6   | 7.51E-10  | 47  | 2    | 9.23E-15  |
| 20803 | 46  | 15  | 54  | 25  | 0.0001078 | 128 | 61   | 1.42E-10  |
| 20804 | 40  | 6   | 69  | 22  | 1.90E-08  | 59  | 19   | 3.00E-08  |
| 20808 | 422 | 304 | 643 | 522 | 4.71E-09  | 905 | 653  | 1.42E-27  |
| 20823 | 2   | 16  | 0   | 9   | 0.0045666 | 2   | 40   | 1.64E-08  |
| 20849 | 258 | 556 | 370 | 931 | 7.69E-41  | 633 | 1584 | 1.68E-52  |
| 20916 | 65  | 26  | 28  | 1   | 8.28E-09  | 92  | 26   | 1.15E-13  |
| 20921 | 3   | 27  | 1   | 48  | 3.60E-12  | 9   | 61   | 2.12E-08  |
| 20928 | 209 | 397 | 288 | 511 | 1.81E-09  | 126 | 219  | 0.0040123 |
| 20932 | 113 | 86  | 144 | 49  | 3.79E-15  | 238 | 106  | 2.04E-20  |
| 20941 | 0   | 16  | 0   | 15  | 9.25E-05  | 1   | 28   | 1.46E-06  |
| 20943 | 15  | 39  | 27  | 65  | 0.0010809 | 35  | 80   | 0.002594  |
| 20946 | 178 | 183 | 274 | 199 | 9.35E-07  | 371 | 344  | 5.46E-05  |
| 20965 | 56  | 150 | 37  | 111 | 8.58E-08  | 103 | 246  | 1.67E-08  |
| 20967 | 0   | 8   | 0   | 8   | 0.008835  | 5   | 60   | 1.09E-10  |
| 20975 | 50  | 67  | 81  | 26  | 1.20E-09  | 159 | 136  | 0.0010102 |
| 20985 | 47  | 50  | 60  | 10  | 1.65E-11  | 96  | 44   | 1.03E-08  |
| 20986 | 119 | 88  | 155 | 47  | 4.29E-18  | 207 | 108  | 2.90E-14  |
| 20990 | 150 | 88  | 203 | 60  | 5.48E-24  | 236 | 116  | 1.05E-17  |
| 20991 | 86  | 54  | 132 | 55  | 4.80E-11  | 69  | 50   | 0.0030468 |
| 20998 | 241 | 286 | 395 | 145 | 6.69E-36  | 476 | 441  | 4.33E-06  |
| 21008 | 5   | 22  | 4   | 49  | 8.31E-10  | 5   | 42   | 9.55E-07  |
| 21009 | 54  | 20  | 60  | 22  | 1.24E-06  | 56  | 29   | 7.10E-05  |
| 21012 | 41  | 50  | 40  | 13  | 2.40E-05  | 83  | 66   | 0.0063202 |
| 21035 | 135 | 143 | 141 | 94  | 4.59E-05  | 189 | 166  | 0.0007535 |
| 21045 | 35  | 96  | 68  | 147 | 1.05E-05  | 95  | 278  | 6.67E-14  |
| 21046 | 19  | 282 | 15  | 413 | 8.34E-91  | 48  | 676  | 5.57E-114 |
| 21049 | 8   | 46  | 4   | 78  | 5.58E-17  | 36  | 145  | 6.35E-12  |
| 21061 | 133 | 257 | 158 | 507 | 5.33E-34  | 314 | 601  | 8.16E-10  |
| 21062 | 45  | 47  | 30  | 9   | 0.0001536 | 42  | 25   | 0.0029526 |
| 21070 | 177 | 560 | 191 | 867 | 2.15E-84  | 286 | 1178 | 1.31E-88  |
| 21080 | 127 | 106 | 219 | 164 | 3.94E-05  | 277 | 227  | 1.85E-06  |
| 21085 | 232 | 368 | 255 | 619 | 7.38E-26  | 512 | 760  | 0.0036363 |

|       |     |      |      |      |           |      |      |           |
|-------|-----|------|------|------|-----------|------|------|-----------|
| 21087 | 12  | 12   | 23   | 6    | 0.0005356 | 46   | 30   | 0.0053254 |
| 21089 | 109 | 205  | 141  | 401  | 8.30E-23  | 280  | 478  | 4.12E-05  |
| 21092 | 103 | 82   | 170  | 134  | 0.001254  | 169  | 131  | 3.42E-05  |
| 21107 | 109 | 54   | 133  | 103  | 0.0032395 | 239  | 142  | 6.25E-13  |
| 21114 | 117 | 163  | 127  | 273  | 1.89E-09  | 217  | 398  | 6.27E-06  |
| 21117 | 306 | 529  | 536  | 1053 | 2.69E-25  | 636  | 1057 | 2.02E-08  |
| 21159 | 26  | 31   | 60   | 17   | 2.85E-08  | 73   | 38   | 8.19E-06  |
| 21174 | 92  | 38   | 130  | 22   | 3.07E-23  | 160  | 54   | 1.82E-19  |
| 21195 | 68  | 15   | 50   | 5    | 5.55E-12  | 103  | 33   | 1.23E-13  |
| 21201 | 49  | 49   | 86   | 52   | 0.0002266 | 140  | 90   | 5.25E-07  |
| 21202 | 133 | 74   | 138  | 29   | 7.86E-22  | 163  | 95   | 1.23E-09  |
| 21203 | 36  | 19   | 45   | 15   | 1.17E-05  | 44   | 16   | 6.28E-06  |
| 21206 | 745 | 400  | 867  | 451  | 1.47E-44  | 991  | 555  | 5.40E-55  |
| 21209 | 15  | 13   | 14   | 1    | 0.0002749 | 34   | 18   | 0.0030096 |
| 21212 | 574 | 381  | 1000 | 598  | 1.69E-37  | 1293 | 692  | 1.42E-77  |
| 21220 | 46  | 42   | 68   | 27   | 1.38E-06  | 67   | 28   | 3.94E-07  |
| 21229 | 9   | 1    | 8    | 0    | 0.0022242 | 6    | 0    | 0.0075755 |
| 21238 | 645 | 1231 | 740  | 1543 | 3.82E-43  | 1192 | 2478 | 1.91E-48  |
| 21240 | 6   | 7    | 0    | 32   | 2.83E-09  | 8    | 32   | 0.0020909 |
| 21241 | 20  | 27   | 83   | 26   | 4.62E-10  | 74   | 18   | 1.86E-12  |
| 21243 | 200 | 313  | 232  | 441  | 1.97E-10  | 392  | 789  | 8.15E-15  |
| 21245 | 60  | 339  | 89   | 608  | 2.12E-81  | 112  | 806  | 1.53E-98  |
| 21246 | 106 | 71   | 126  | 96   | 0.0029904 | 203  | 120  | 2.43E-11  |
| 21254 | 120 | 84   | 158  | 101  | 3.59E-06  | 251  | 111  | 1.07E-21  |
| 21255 | 35  | 66   | 32   | 71   | 0.0015085 | 56   | 123  | 0.0003915 |
| 21261 | 179 | 337  | 206  | 369  | 1.98E-07  | 316  | 573  | 1.29E-07  |
| 21266 | 63  | 168  | 102  | 243  | 1.29E-10  | 151  | 449  | 3.04E-22  |
| 21269 | 816 | 2532 | 1093 | 4499 | 0         | 2465 | 7267 | 0         |
| 21272 | 81  | 126  | 95   | 176  | 0.0001503 | 197  | 349  | 0.0001028 |
| 21302 | 22  | 58   | 29   | 75   | 0.000111  | 60   | 121  | 0.0026742 |
| 21303 | 201 | 159  | 355  | 295  | 4.96E-05  | 448  | 279  | 8.75E-21  |
| 21315 | 29  | 114  | 53   | 191  | 1.18E-15  | 41   | 153  | 2.02E-11  |
| 21340 | 145 | 304  | 348  | 604  | 3.96E-10  | 380  | 737  | 2.91E-12  |
| 21344 | 170 | 1754 | 267  | 3684 | 0         | 410  | 4852 | 0         |
| 21380 | 23  | 20   | 32   | 11   | 0.0003204 | 41   | 24   | 0.0026003 |
| 21385 | 41  | 22   | 75   | 34   | 4.55E-06  | 85   | 47   | 4.08E-06  |
| 21395 | 183 | 147  | 333  | 291  | 0.000742  | 374  | 186  | 1.16E-26  |
| 21413 | 139 | 108  | 261  | 204  | 4.13E-05  | 255  | 128  | 2.42E-18  |
| 21414 | 115 | 283  | 168  | 465  | 4.50E-25  | 299  | 585  | 2.61E-10  |
| 21415 | 681 | 3016 | 1027 | 5265 | 0         | 1586 | 6941 | 0         |
| 21427 | 261 | 101  | 266  | 116  | 1.09E-19  | 436  | 110  | 8.39E-65  |
| 21443 | 14  | 41   | 24   | 68   | 6.15E-05  | 21   | 111  | 6.52E-12  |
| 21446 | 93  | 102  | 161  | 132  | 0.0048609 | 220  | 189  | 0.0001236 |
| 21447 | 76  | 59   | 114  | 84   | 0.0021386 | 96   | 65   | 0.0001255 |
| 21449 | 4   | 9    | 6    | 26   | 0.0012815 | 4    | 27   | 0.000382  |
| 21467 | 43  | 124  | 43   | 177  | 8.02E-17  | 102  | 250  | 3.86E-09  |
| 21471 | 33  | 19   | 66   | 39   | 0.0011416 | 71   | 46   | 0.0005185 |
| 21474 | 142 | 285  | 217  | 532  | 7.20E-23  | 354  | 612  | 1.57E-06  |
| 21475 | 36  | 89   | 70   | 144  | 4.76E-05  | 111  | 237  | 2.43E-06  |
| 21476 | 88  | 48   | 85   | 57   | 0.0017741 | 130  | 50   | 4.43E-14  |
| 21477 | 86  | 178  | 131  | 380  | 2.34E-22  | 131  | 301  | 2.80E-09  |
| 21484 | 5   | 12   | 3    | 18   | 0.0033896 | 6    | 26   | 0.0037714 |
| 21485 | 135 | 582  | 217  | 1045 | 4.56E-107 | 316  | 1515 | 3.70E-133 |
| 21488 | 131 | 399  | 211  | 599  | 3.16E-33  | 292  | 963  | 2.94E-54  |
| 21489 | 194 | 340  | 352  | 763  | 2.11E-24  | 331  | 676  | 1.46E-13  |
| 21490 | 35  | 15   | 51   | 7    | 9.37E-11  | 67   | 32   | 3.66E-06  |
| 21491 | 92  | 43   | 100  | 19   | 3.49E-17  | 225  | 101  | 2.59E-19  |
| 21498 | 59  | 44   | 32   | 15   | 0.0033138 | 73   | 32   | 3.12E-07  |
| 21513 | 109 | 25   | 169  | 40   | 3.47E-24  | 204  | 44   | 1.04E-34  |
| 21514 | 10  | 6    | 18   | 1    | 1.81E-05  | 30   | 12   | 0.0004963 |
| 21531 | 158 | 235  | 198  | 341  | 4.42E-06  | 278  | 462  | 0.0002121 |
| 21556 | 198 | 134  | 282  | 207  | 1.12E-06  | 372  | 207  | 6.44E-22  |
| 21560 | 77  | 34   | 89   | 33   | 4.92E-09  | 137  | 61   | 2.33E-12  |
| 21561 | 39  | 27   | 64   | 19   | 2.59E-08  | 73   | 55   | 0.0042938 |
| 21566 | 32  | 24   | 66   | 22   | 7.84E-08  | 68   | 39   | 8.28E-05  |
| 21567 | 20  | 19   | 38   | 7    | 2.19E-07  | 88   | 22   | 2.33E-14  |

|       |      |      |      |      |           |      |      |           |
|-------|------|------|------|------|-----------|------|------|-----------|
| 21571 | 20   | 17   | 28   | 8    | 0.0001706 | 40   | 22   | 0.0019088 |
| 21574 | 129  | 81   | 152  | 43   | 4.60E-19  | 229  | 149  | 2.65E-10  |
| 21586 | 190  | 380  | 278  | 597  | 5.17E-19  | 421  | 740  | 2.64E-08  |
| 21591 | 627  | 894  | 1029 | 1464 | 9.10E-08  | 1747 | 2645 | 1.21E-09  |
| 21599 | 1076 | 1752 | 1374 | 2473 | 2.14E-42  | 1992 | 3451 | 7.27E-31  |
| 21606 | 19   | 7    | 39   | 2    | 3.53E-11  | 62   | 8    | 1.44E-14  |
| 21617 | 127  | 113  | 204  | 149  | 2.96E-05  | 264  | 222  | 1.10E-05  |
| 21640 | 8    | 53   | 8    | 46   | 1.51E-06  | 9    | 45   | 2.54E-05  |
| 21641 | 57   | 293  | 32   | 344  | 2.27E-58  | 66   | 438  | 2.08E-51  |
| 21642 | 2    | 9    | 0    | 8    | 0.008835  | 0    | 17   | 6.95E-05  |
| 21643 | 0    | 9    | 1    | 13   | 0.0024141 | 1    | 32   | 1.36E-07  |
| 21646 | 17   | 181  | 9    | 289  | 1.12E-65  | 31   | 442  | 2.29E-75  |
| 21659 | 50   | 33   | 64   | 42   | 0.0046852 | 79   | 29   | 2.23E-09  |
| 21660 | 129  | 70   | 118  | 56   | 1.91E-08  | 205  | 126  | 1.35E-10  |
| 21662 | 76   | 199  | 46   | 139  | 1.37E-09  | 54   | 183  | 7.51E-12  |
| 21665 | 152  | 102  | 196  | 84   | 3.47E-15  | 255  | 157  | 1.12E-12  |
| 21666 | 175  | 72   | 269  | 89   | 5.79E-28  | 373  | 134  | 1.65E-40  |
| 21667 | 11   | 20   | 10   | 56   | 8.96E-08  | 11   | 56   | 1.71E-06  |
| 21669 | 123  | 60   | 201  | 68   | 8.09E-21  | 227  | 109  | 1.17E-17  |
| 21671 | 11   | 58   | 3    | 73   | 1.30E-16  | 19   | 116  | 8.94E-14  |
| 21672 | 191  | 165  | 380  | 302  | 2.21E-06  | 422  | 311  | 7.05E-13  |
| 21679 | 90   | 158  | 104  | 176  | 0.0014776 | 209  | 347  | 0.0013577 |
| 21685 | 99   | 83   | 140  | 95   | 8.05E-05  | 177  | 99   | 5.09E-11  |
| 21686 | 84   | 56   | 124  | 63   | 6.36E-08  | 113  | 56   | 5.62E-09  |
| 21689 | 24   | 21   | 5    | 59   | 2.45E-11  | 27   | 75   | 0.0002901 |
| 21692 | 84   | 72   | 116  | 91   | 0.0079585 | 169  | 134  | 7.88E-05  |
| 21723 | 49   | 22   | 58   | 7    | 6.21E-13  | 58   | 38   | 0.0019105 |
| 21731 | 130  | 114  | 252  | 153  | 3.49E-10  | 211  | 174  | 3.87E-05  |
| 21735 | 24   | 8    | 57   | 12   | 1.24E-09  | 55   | 18   | 9.22E-08  |
| 21770 | 76   | 61   | 50   | 29   | 0.0032259 | 51   | 26   | 0.0001274 |
| 21777 | 49   | 120  | 52   | 182  | 1.43E-14  | 108  | 252  | 2.85E-08  |
| 21782 | 221  | 290  | 305  | 528  | 6.03E-09  | 506  | 761  | 0.00169   |
| 21786 | 28   | 8    | 36   | 9    | 6.91E-06  | 58   | 14   | 4.89E-10  |
| 21790 | 49   | 103  | 93   | 185  | 1.03E-05  | 104  | 194  | 0.0010666 |
| 21791 | 7    | 18   | 6    | 23   | 0.0049009 | 4    | 39   | 1.35E-06  |
| 21797 | 114  | 86   | 153  | 121  | 0.0024152 | 204  | 178  | 0.0003732 |
| 21802 | 260  | 165  | 462  | 355  | 1.48E-08  | 717  | 455  | 5.52E-31  |
| 21805 | 135  | 279  | 285  | 605  | 1.04E-18  | 367  | 877  | 1.03E-26  |
| 21809 | 276  | 165  | 302  | 133  | 8.96E-22  | 305  | 201  | 7.25E-13  |
| 21815 | 179  | 151  | 291  | 266  | 0.0084049 | 298  | 204  | 1.56E-11  |
| 21821 | 3    | 40   | 7    | 54   | 7.19E-09  | 15   | 73   | 7.58E-08  |
| 21830 | 68   | 1110 | 92   | 1852 | 0         | 207  | 3298 | 0         |
| 21833 | 2    | 22   | 0    | 28   | 4.07E-08  | 1    | 26   | 4.90E-06  |
| 21834 | 88   | 9    | 123  | 40   | 1.02E-13  | 165  | 43   | 7.01E-25  |
| 21840 | 110  | 233  | 164  | 477  | 7.90E-28  | 195  | 521  | 6.09E-21  |
| 21841 | 10   | 89   | 12   | 145  | 1.28E-26  | 10   | 159  | 9.09E-29  |
| 21842 | 316  | 251  | 561  | 367  | 3.09E-17  | 464  | 343  | 7.24E-14  |
| 21867 | 94   | 224  | 82   | 326  | 7.32E-29  | 163  | 473  | 2.10E-22  |
| 21868 | 16   | 40   | 27   | 127  | 6.20E-14  | 49   | 222  | 9.26E-20  |
| 21873 | 3    | 12   | 1    | 18   | 0.0001284 | 2    | 39   | 2.92E-08  |
| 21876 | 246  | 209  | 336  | 270  | 1.52E-05  | 503  | 375  | 1.52E-14  |
| 21879 | 3    | 6    | 3    | 32   | 1.66E-06  | 5    | 38   | 7.72E-06  |
| 21881 | 151  | 223  | 150  | 297  | 2.48E-08  | 242  | 427  | 2.14E-05  |
| 21887 | 108  | 179  | 91   | 339  | 7.44E-28  | 192  | 397  | 7.09E-09  |
| 21903 | 39   | 23   | 41   | 15   | 7.32E-05  | 52   | 32   | 0.0013522 |
| 21907 | 108  | 88   | 58   | 26   | 4.07E-05  | 122  | 59   | 4.50E-10  |
| 21943 | 15   | 40   | 13   | 74   | 8.32E-10  | 18   | 71   | 2.88E-06  |
| 21961 | 11   | 17   | 0    | 24   | 3.00E-07  | 6    | 48   | 2.64E-07  |
| 21971 | 92   | 317  | 125  | 246  | 5.17E-07  | 183  | 596  | 1.79E-33  |
| 21974 | 156  | 149  | 144  | 62   | 1.55E-11  | 197  | 176  | 0.0010126 |
| 21975 | 82   | 104  | 70   | 36   | 8.15E-05  | 55   | 31   | 0.0002978 |
| 21986 | 21   | 15   | 13   | 2    | 0.0028098 | 23   | 7    | 0.0003777 |
| 21990 | 30   | 16   | 59   | 24   | 7.71E-06  | 54   | 24   | 1.07E-05  |
| 21994 | 19   | 29   | 9    | 78   | 4.41E-13  | 21   | 71   | 2.16E-05  |
| 21995 | 49   | 123  | 57   | 165  | 2.13E-10  | 43   | 145  | 1.50E-09  |
| 22012 | 60   | 50   | 66   | 33   | 7.10E-05  | 96   | 54   | 1.44E-06  |

|       |     |     |     |      |           |      |      |           |
|-------|-----|-----|-----|------|-----------|------|------|-----------|
| 22014 | 83  | 55  | 101 | 34   | 3.18E-11  | 129  | 72   | 2.03E-08  |
| 22028 | 20  | 94  | 38  | 119  | 8.25E-09  | 34   | 167  | 2.73E-16  |
| 22030 | 426 | 200 | 467 | 281  | 3.91E-18  | 474  | 257  | 7.98E-29  |
| 22035 | 46  | 67  | 100 | 42   | 1.53E-08  | 123  | 81   | 5.50E-06  |
| 22139 | 293 | 125 | 260 | 119  | 6.19E-18  | 381  | 183  | 1.31E-28  |
| 22234 | 59  | 143 | 76  | 205  | 2.65E-11  | 170  | 319  | 1.81E-05  |
| 22361 | 396 | 212 | 629 | 261  | 1.14E-47  | 883  | 229  | 8.85E-127 |
| 22364 | 61  | 303 | 91  | 317  | 3.66E-24  | 103  | 763  | 5.17E-95  |
| 22371 | 135 | 125 | 177 | 68   | 4.88E-16  | 222  | 140  | 1.03E-10  |
| 22372 | 174 | 147 | 240 | 161  | 1.26E-07  | 107  | 92   | 0.0081729 |
| 22376 | 13  | 8   | 29  | 3    | 2.55E-07  | 29   | 14   | 0.0030896 |
| 22381 | 125 | 252 | 222 | 409  | 7.90E-09  | 384  | 614  | 0.0002157 |
| 22386 | 110 | 106 | 218 | 112  | 1.31E-12  | 220  | 194  | 0.0003572 |
| 22403 | 79  | 45  | 147 | 78   | 2.03E-08  | 124  | 59   | 2.01E-10  |
| 22404 | 98  | 40  | 92  | 45   | 1.80E-06  | 140  | 61   | 6.69E-13  |
| 22411 | 48  | 18  | 73  | 9    | 1.39E-15  | 64   | 12   | 1.08E-12  |
| 22423 | 28  | 12  | 81  | 22   | 3.33E-11  | 86   | 16   | 1.24E-16  |
| 22426 | 102 | 87  | 98  | 72   | 0.0043477 | 178  | 135  | 1.07E-05  |
| 22432 | 3   | 11  | 0   | 16   | 4.86E-05  | 4    | 26   | 0.0006365 |
| 22438 | 19  | 61  | 18  | 57   | 6.73E-05  | 43   | 88   | 0.0082192 |
| 22443 | 368 | 313 | 395 | 268  | 2.24E-11  | 796  | 517  | 2.78E-32  |
| 22451 | 213 | 45  | 251 | 39   | 8.93E-46  | 209  | 80   | 7.06E-22  |
| 22462 | 268 | 182 | 293 | 176  | 6.86E-12  | 478  | 324  | 4.43E-18  |
| 22467 | 134 | 114 | 179 | 45   | 2.17E-24  | 250  | 142  | 1.16E-14  |
| 22493 | 178 | 328 | 120 | 192  | 0.0044742 | 194  | 382  | 2.26E-07  |
| 22496 | 52  | 94  | 36  | 113  | 2.21E-08  | 115  | 221  | 0.000182  |
| 22501 | 5   | 50  | 11  | 56   | 2.55E-07  | 16   | 79   | 1.94E-08  |
| 22504 | 46  | 33  | 56  | 10   | 1.73E-10  | 69   | 31   | 8.43E-07  |
| 22507 | 226 | 191 | 290 | 84   | 3.65E-34  | 433  | 384  | 6.54E-07  |
| 22509 | 5   | 40  | 0   | 44   | 1.16E-12  | 3    | 87   | 9.00E-19  |
| 22510 | 137 | 75  | 139 | 50   | 7.68E-14  | 191  | 116  | 3.65E-10  |
| 22514 | 213 | 549 | 300 | 548  | 4.11E-11  | 432  | 1224 | 5.49E-53  |
| 22515 | 26  | 29  | 50  | 19   | 1.69E-05  | 58   | 35   | 0.0005244 |
| 22517 | 82  | 48  | 110 | 78   | 0.0012431 | 117  | 71   | 9.91E-07  |
| 22524 | 138 | 81  | 240 | 185  | 5.19E-05  | 119  | 89   | 0.0002049 |
| 22530 | 38  | 36  | 48  | 22   | 0.00027   | 68   | 48   | 0.0026269 |
| 22543 | 158 | 119 | 173 | 112  | 2.36E-06  | 196  | 178  | 0.0017683 |
| 22544 | 2   | 25  | 3   | 56   | 2.22E-12  | 9    | 47   | 1.03E-05  |
| 22545 | 251 | 284 | 386 | 269  | 3.03E-10  | 674  | 731  | 0.0061474 |
| 22555 | 158 | 79  | 229 | 104  | 3.72E-16  | 260  | 134  | 5.28E-18  |
| 22563 | 28  | 174 | 45  | 355  | 2.83E-52  | 55   | 524  | 2.27E-75  |
| 22570 | 763 | 565 | 670 | 460  | 1.33E-17  | 1072 | 695  | 3.70E-43  |
| 22572 | 149 | 374 | 313 | 647  | 1.47E-18  | 368  | 859  | 9.25E-25  |
| 22578 | 157 | 142 | 169 | 99   | 7.76E-08  | 230  | 217  | 0.0026715 |
| 22584 | 46  | 38  | 81  | 49   | 0.0003987 | 110  | 73   | 1.97E-05  |
| 22587 | 125 | 619 | 177 | 419  | 4.05E-17  | 192  | 1054 | 2.57E-105 |
| 22590 | 61  | 25  | 81  | 41   | 1.57E-05  | 123  | 50   | 1.66E-12  |
| 22593 | 17  | 38  | 50  | 94   | 0.00441   | 28   | 94   | 1.48E-06  |
| 22598 | 499 | 971 | 404 | 582  | 0.0003919 | 637  | 1420 | 3.69E-35  |
| 22599 | 8   | 46  | 10  | 130  | 1.31E-24  | 28   | 208  | 5.78E-27  |
| 22603 | 72  | 133 | 99  | 241  | 6.30E-11  | 145  | 282  | 1.39E-05  |
| 22606 | 191 | 110 | 259 | 109  | 3.29E-20  | 366  | 183  | 6.41E-26  |
| 22610 | 144 | 616 | 344 | 935  | 3.04E-47  | 389  | 1369 | 5.42E-84  |
| 22621 | 1   | 3   | 17  | 2    | 0.0002408 | 10   | 1    | 0.003515  |
| 22624 | 248 | 115 | 366 | 194  | 5.01E-19  | 488  | 143  | 4.38E-64  |
| 22634 | 27  | 97  | 69  | 171  | 1.91E-08  | 56   | 253  | 3.08E-22  |
| 22635 | 59  | 19  | 125 | 60   | 1.33E-08  | 148  | 59   | 3.11E-15  |
| 22786 | 2   | 32  | 5   | 46   | 2.14E-08  | 3    | 94   | 2.38E-20  |
| 22788 | 67  | 133 | 80  | 203  | 3.69E-10  | 133  | 373  | 5.85E-17  |
| 22790 | 300 | 640 | 347 | 1097 | 3.83E-70  | 556  | 1277 | 1.47E-34  |
| 22801 | 24  | 61  | 41  | 79   | 0.0077021 | 72   | 159  | 4.95E-05  |
| 22802 | 220 | 112 | 416 | 252  | 5.79E-16  | 475  | 148  | 4.64E-59  |
| 22888 | 426 | 324 | 504 | 301  | 1.03E-19  | 554  | 499  | 7.54E-08  |
| 22889 | 200 | 220 | 245 | 187  | 2.62E-05  | 555  | 524  | 3.08E-06  |
| 22891 | 70  | 52  | 86  | 46   | 2.32E-05  | 130  | 65   | 4.66E-10  |
| 22904 | 21  | 225 | 24  | 245  | 3.00E-41  | 46   | 480  | 2.67E-72  |



|       |      |      |      |      |           |      |      |           |
|-------|------|------|------|------|-----------|------|------|-----------|
| 22910 | 27   | 13   | 32   | 11   | 0.0003204 | 65   | 26   | 2.19E-07  |
| 22911 | 24   | 10   | 36   | 5    | 4.69E-08  | 52   | 26   | 8.58E-05  |
| 22914 | 26   | 27   | 46   | 13   | 1.23E-06  | 32   | 14   | 0.0008741 |
| 22923 | 2088 | 1758 | 2254 | 897  | 1.39E-176 | 3536 | 2446 | 2.24E-116 |
| 22925 | 14   | 67   | 24   | 96   | 1.92E-09  | 19   | 109  | 1.48E-12  |
| 22926 | 243  | 178  | 432  | 106  | 4.93E-58  | 482  | 275  | 1.38E-26  |
| 22927 | 42   | 141  | 85   | 313  | 1.64E-25  | 114  | 448  | 7.87E-33  |
| 22928 | 18   | 106  | 28   | 187  | 1.48E-25  | 23   | 215  | 1.52E-31  |
| 22934 | 75   | 33   | 72   | 4    | 2.78E-19  | 126  | 33   | 3.90E-19  |
| 22945 | 31   | 123  | 41   | 128  | 2.62E-09  | 63   | 255  | 4.81E-20  |
| 22946 | 68   | 165  | 70   | 183  | 9.21E-10  | 120  | 302  | 2.52E-11  |
| 22947 | 117  | 105  | 157  | 129  | 0.0052874 | 205  | 180  | 0.0004736 |
| 22966 | 119  | 89   | 103  | 15   | 4.41E-20  | 102  | 63   | 6.80E-06  |
| 22975 | 33   | 62   | 38   | 142  | 1.97E-12  | 97   | 415  | 1.33E-33  |
| 22976 | 91   | 50   | 99   | 30   | 4.36E-12  | 162  | 79   | 1.03E-12  |
| 22990 | 133  | 96   | 215  | 174  | 0.0006491 | 263  | 228  | 4.18E-05  |
| 22999 | 7    | 27   | 8    | 32   | 0.0006902 | 14   | 68   | 2.81E-07  |
| 23002 | 105  | 474  | 132  | 625  | 8.06E-64  | 207  | 874  | 6.49E-68  |
| 23013 | 34   | 11   | 76   | 20   | 9.27E-11  | 86   | 24   | 6.03E-13  |
| 23015 | 267  | 190  | 306  | 132  | 1.05E-22  | 462  | 279  | 8.20E-23  |
| 23018 | 26   | 158  | 42   | 230  | 1.95E-27  | 81   | 345  | 4.34E-28  |
| 23027 | 193  | 167  | 279  | 218  | 2.26E-05  | 460  | 414  | 8.97E-07  |
| 23033 | 280  | 1898 | 354  | 2033 | 3.19E-238 | 405  | 3039 | 0         |
| 23034 | 10   | 29   | 8    | 73   | 1.64E-12  | 15   | 68   | 6.53E-07  |
| 23035 | 119  | 79   | 94   | 45   | 8.84E-07  | 144  | 111  | 0.0001129 |
| 23036 | 150  | 89   | 164  | 29   | 1.68E-28  | 152  | 135  | 0.0035462 |
| 23038 | 270  | 188  | 383  | 291  | 1.13E-07  | 481  | 284  | 9.32E-25  |
| 23051 | 2    | 17   | 13   | 39   | 0.0019532 | 7    | 26   | 0.0079116 |
| 23058 | 1579 | 862  | 2781 | 1571 | 3.08E-116 | 3555 | 1269 | 0         |
| 23063 | 36   | 25   | 52   | 12   | 1.89E-08  | 70   | 51   | 0.0032684 |
| 23077 | 60   | 152  | 83   | 193  | 3.01E-08  | 115  | 267  | 1.59E-08  |
| 23078 | 137  | 329  | 182  | 368  | 1.50E-10  | 300  | 547  | 1.64E-07  |
| 23082 | 108  | 68   | 177  | 116  | 2.46E-06  | 264  | 162  | 3.07E-13  |
| 23083 | 113  | 393  | 63   | 191  | 1.26E-12  | 62   | 236  | 2.87E-17  |
| 23086 | 48   | 62   | 67   | 172  | 5.37E-09  | 85   | 179  | 6.85E-05  |
| 23091 | 155  | 310  | 255  | 510  | 1.05E-13  | 388  | 622  | 0.0001614 |
| 23092 | 28   | 45   | 50   | 93   | 0.0055499 | 64   | 147  | 3.91E-05  |
| 23093 | 171  | 391  | 241  | 529  | 6.28E-18  | 335  | 678  | 3.51E-13  |
| 23095 | 101  | 301  | 164  | 447  | 1.68E-23  | 284  | 746  | 2.07E-28  |
| 23098 | 105  | 589  | 202  | 1052 | 3.20E-115 | 246  | 1046 | 1.05E-81  |
| 23100 | 40   | 12   | 38   | 15   | 0.0002751 | 56   | 11   | 7.04E-11  |
| 23105 | 129  | 85   | 198  | 123  | 6.46E-08  | 341  | 248  | 4.37E-11  |
| 23112 | 29   | 50   | 25   | 58   | 0.0027891 | 80   | 149  | 0.0041921 |
| 23114 | 50   | 33   | 81   | 53   | 0.0017211 | 103  | 64   | 7.57E-06  |
| 23117 | 6    | 0    | 21   | 4    | 0.0001705 | 17   | 4    | 0.0007589 |
| 23126 | 32   | 16   | 64   | 25   | 1.84E-06  | 59   | 27   | 6.30E-06  |
| 23131 | 61   | 43   | 74   | 53   | 0.0096819 | 163  | 67   | 5.78E-16  |
| 23140 | 15   | 52   | 16   | 65   | 5.80E-07  | 52   | 103  | 0.0074702 |
| 23142 | 25   | 6    | 77   | 21   | 1.51E-10  | 44   | 12   | 2.31E-07  |
| 23146 | 29   | 28   | 49   | 30   | 0.0066126 | 60   | 44   | 0.0074303 |
| 23149 | 177  | 125  | 77   | 39   | 2.27E-05  | 172  | 86   | 6.09E-13  |
| 23159 | 2    | 5    | 0    | 13   | 0.0003359 | 0    | 12   | 0.0018112 |
| 23162 | 23   | 80   | 23   | 104  | 2.37E-11  | 50   | 171  | 2.44E-11  |
| 23165 | 18   | 48   | 17   | 44   | 0.0043484 | 39   | 83   | 0.0061297 |
| 23166 | 142  | 94   | 169  | 70   | 7.79E-14  | 289  | 190  | 2.50E-12  |
| 23168 | 657  | 743  | 735  | 482  | 6.07E-22  | 1301 | 1306 | 1.05E-08  |
| 23169 | 133  | 71   | 210  | 45   | 4.77E-32  | 235  | 125  | 1.61E-15  |
| 23174 | 39   | 24   | 77   | 33   | 1.15E-06  | 106  | 61   | 7.20E-07  |
| 23179 | 203  | 167  | 202  | 89   | 4.81E-15  | 408  | 224  | 2.16E-24  |
| 23180 | 13   | 117  | 32   | 173  | 8.05E-21  | 44   | 335  | 2.66E-43  |
| 23191 | 61   | 48   | 93   | 54   | 6.29E-05  | 141  | 104  | 3.56E-05  |
| 23197 | 39   | 134  | 78   | 184  | 3.78E-08  | 152  | 350  | 1.36E-10  |
| 23207 | 34   | 24   | 40   | 20   | 0.0026073 | 71   | 29   | 8.72E-08  |
| 23208 | 54   | 43   | 33   | 16   | 0.003956  | 73   | 42   | 4.51E-05  |
| 23231 | 30   | 90   | 35   | 120  | 7.59E-10  | 57   | 152  | 4.33E-07  |
| 23233 | 82   | 10   | 115  | 17   | 3.06E-22  | 87   | 19   | 1.95E-15  |

|       |     |      |      |      |           |      |      |           |
|-------|-----|------|------|------|-----------|------|------|-----------|
| 23244 | 65  | 51   | 104  | 70   | 0.0005904 | 141  | 85   | 6.20E-08  |
| 23250 | 24  | 86   | 40   | 131  | 4.40E-10  | 36   | 112  | 5.21E-07  |
| 23258 | 16  | 77   | 36   | 149  | 2.05E-14  | 26   | 195  | 1.27E-25  |
| 23259 | 23  | 79   | 36   | 113  | 2.21E-08  | 74   | 136  | 0.0082302 |
| 23264 | 15  | 0    | 22   | 0    | 5.07E-08  | 19   | 1    | 2.23E-06  |
| 23268 | 126 | 427  | 211  | 713  | 1.66E-50  | 294  | 1058 | 2.78E-67  |
| 23270 | 4   | 17   | 0    | 13   | 0.0003359 | 3    | 23   | 0.0005376 |
| 23274 | 46  | 340  | 67   | 412  | 6.48E-52  | 143  | 885  | 2.21E-97  |
| 23304 | 24  | 74   | 34   | 94   | 4.70E-06  | 53   | 170  | 2.11E-10  |
| 23322 | 14  | 9    | 37   | 7    | 3.93E-07  | 49   | 20   | 8.78E-06  |
| 23325 | 108 | 55   | 151  | 87   | 2.23E-07  | 170  | 92   | 2.42E-11  |
| 23330 | 134 | 341  | 219  | 457  | 6.95E-14  | 255  | 616  | 8.56E-20  |
| 23336 | 80  | 482  | 194  | 935  | 4.46E-96  | 252  | 1199 | 5.93E-105 |
| 23337 | 153 | 368  | 240  | 734  | 2.98E-45  | 468  | 1181 | 2.17E-40  |
| 23344 | 9   | 65   | 19   | 108  | 7.06E-14  | 42   | 137  | 1.01E-08  |
| 23346 | 223 | 474  | 381  | 735  | 3.93E-17  | 566  | 1071 | 1.14E-15  |
| 23364 | 1   | 14   | 0    | 45   | 6.11E-13  | 3    | 46   | 5.83E-09  |
| 23365 | 178 | 433  | 400  | 713  | 7.13E-13  | 399  | 971  | 8.22E-31  |
| 23373 | 69  | 44   | 96   | 52   | 1.02E-05  | 160  | 54   | 1.82E-19  |
| 23374 | 61  | 403  | 101  | 625  | 1.60E-78  | 169  | 690  | 4.59E-52  |
| 23382 | 136 | 225  | 116  | 303  | 3.19E-15  | 195  | 489  | 2.58E-17  |
| 23387 | 182 | 37   | 192  | 37   | 1.83E-31  | 117  | 27   | 1.10E-19  |
| 23390 | 319 | 231  | 379  | 358  | 0.0087573 | 634  | 516  | 2.31E-13  |
| 23416 | 0   | 3    | 0    | 17   | 2.56E-05  | 0    | 11   | 0.0017252 |
| 23422 | 132 | 70   | 108  | 68   | 0.0001052 | 187  | 74   | 6.09E-19  |
| 23427 | 113 | 84   | 191  | 146  | 0.0002435 | 283  | 161  | 2.92E-16  |
| 23428 | 45  | 55   | 42   | 115  | 5.02E-07  | 81   | 149  | 0.0052907 |
| 23431 | 148 | 147  | 290  | 257  | 0.00269   | 363  | 256  | 1.02E-12  |
| 23432 | 43  | 41   | 83   | 58   | 0.0039824 | 147  | 88   | 2.48E-08  |
| 23450 | 267 | 187  | 332  | 226  | 1.08E-09  | 590  | 266  | 1.04E-47  |
| 23454 | 721 | 1117 | 1277 | 1814 | 3.62E-09  | 2012 | 2987 | 6.74E-09  |
| 23456 | 174 | 154  | 212  | 120  | 3.45E-10  | 388  | 215  | 6.94E-23  |
| 23466 | 403 | 162  | 362  | 161  | 1.78E-25  | 698  | 281  | 4.30E-65  |
| 23468 | 316 | 237  | 323  | 244  | 7.89E-07  | 771  | 484  | 4.84E-34  |
| 23469 | 120 | 240  | 93   | 285  | 1.34E-18  | 183  | 413  | 1.35E-11  |
| 23487 | 78  | 56   | 119  | 52   | 1.89E-09  | 114  | 66   | 3.69E-07  |
| 23488 | 259 | 178  | 316  | 178  | 9.91E-15  | 435  | 173  | 9.20E-42  |
| 23490 | 352 | 394  | 513  | 481  | 0.0016372 | 855  | 729  | 1.51E-14  |
| 23492 | 53  | 19   | 59   | 3    | 1.77E-16  | 95   | 21   | 1.24E-16  |
| 23496 | 51  | 54   | 103  | 78   | 0.0057778 | 135  | 118  | 0.0043264 |
| 23505 | 224 | 443  | 282  | 537  | 1.95E-12  | 449  | 862  | 1.44E-13  |
| 23515 | 26  | 149  | 43   | 264  | 8.26E-34  | 79   | 274  | 1.13E-17  |
| 23519 | 134 | 88   | 177  | 98   | 4.55E-09  | 274  | 189  | 1.51E-10  |
| 23526 | 1   | 16   | 16   | 50   | 0.0002793 | 19   | 55   | 0.0014085 |
| 23529 | 14  | 23   | 8    | 35   | 0.0001787 | 9    | 43   | 6.25E-05  |
| 23534 | 63  | 95   | 101  | 164  | 0.0055664 | 130  | 273  | 8.15E-07  |
| 23601 | 28  | 10   | 20   | 0    | 2.33E-07  | 47   | 14   | 3.75E-07  |
| 23615 | 70  | 54   | 141  | 43   | 1.68E-16  | 182  | 112  | 1.52E-09  |
| 23619 | 62  | 150  | 66   | 210  | 9.88E-15  | 176  | 298  | 0.0016469 |
| 23620 | 180 | 112  | 190  | 56   | 1.33E-22  | 289  | 145  | 1.06E-20  |
| 23623 | 196 | 164  | 255  | 225  | 0.0045217 | 356  | 345  | 0.0006152 |
| 23626 | 125 | 59   | 210  | 85   | 1.62E-17  | 300  | 60   | 1.19E-52  |
| 23627 | 4   | 26   | 5    | 26   | 0.0004934 | 11   | 50   | 2.43E-05  |
| 23639 | 35  | 116  | 56   | 170  | 1.94E-11  | 114  | 328  | 9.03E-16  |
| 23642 | 167 | 97   | 244  | 189  | 5.02E-05  | 377  | 198  | 1.46E-24  |
| 23645 | 176 | 144  | 239  | 117  | 8.52E-15  | 233  | 166  | 1.84E-08  |
| 23649 | 70  | 93   | 64   | 42   | 0.0046852 | 141  | 100  | 1.23E-05  |
| 23652 | 135 | 95   | 157  | 125  | 0.0023158 | 233  | 171  | 9.35E-08  |
| 23654 | 14  | 49   | 37   | 74   | 0.0055956 | 44   | 102  | 0.0005899 |
| 23661 | 82  | 99   | 125  | 81   | 6.22E-05  | 193  | 129  | 2.20E-08  |
| 23685 | 112 | 252  | 188  | 452  | 6.49E-19  | 179  | 545  | 9.13E-28  |
| 23686 | 40  | 14   | 69   | 7    | 4.86E-16  | 66   | 25   | 6.38E-08  |
| 23701 | 76  | 58   | 76   | 48   | 0.0011367 | 126  | 81   | 2.26E-06  |
| 23709 | 236 | 150  | 304  | 143  | 9.02E-20  | 470  | 343  | 1.31E-14  |
| 23711 | 53  | 37   | 63   | 32   | 0.0001237 | 108  | 60   | 2.18E-07  |
| 23715 | 48  | 22   | 65   | 23   | 2.74E-07  | 100  | 34   | 1.37E-12  |

|       |     |      |     |      |           |      |      |           |
|-------|-----|------|-----|------|-----------|------|------|-----------|
| 23730 | 171 | 418  | 150 | 279  | 1.19E-06  | 242  | 559  | 3.26E-16  |
| 23745 | 70  | 36   | 84  | 30   | 4.96E-09  | 158  | 58   | 1.40E-17  |
| 23748 | 127 | 76   | 165 | 42   | 2.38E-22  | 125  | 95   | 0.0002324 |
| 23750 | 59  | 38   | 70  | 49   | 0.0097917 | 81   | 58   | 0.0011121 |
| 23767 | 12  | 61   | 6   | 67   | 1.31E-12  | 27   | 105  | 1.13E-08  |
| 23769 | 164 | 105  | 209 | 88   | 1.69E-16  | 242  | 202  | 2.00E-05  |
| 23774 | 35  | 49   | 25  | 58   | 0.0027891 | 49   | 105  | 0.0019604 |
| 23779 | 640 | 1312 | 914 | 1606 | 1.08E-25  | 1284 | 2510 | 1.99E-39  |
| 23794 | 49  | 19   | 45  | 18   | 0.0001125 | 103  | 45   | 6.95E-10  |
| 23797 | 35  | 103  | 33  | 124  | 3.48E-11  | 45   | 121  | 6.90E-06  |
| 23799 | 78  | 58   | 58  | 38   | 0.0075937 | 80   | 64   | 0.0071882 |
| 23815 | 15  | 17   | 19  | 2    | 3.46E-05  | 36   | 13   | 4.11E-05  |
| 23818 | 3   | 21   | 2   | 19   | 0.0005904 | 8    | 43   | 2.59E-05  |
| 23819 | 51  | 27   | 91  | 28   | 3.65E-11  | 72   | 17   | 1.88E-12  |
| 23831 | 77  | 54   | 84  | 26   | 2.87E-10  | 98   | 73   | 0.0006825 |
| 23842 | 576 | 1886 | 699 | 1122 | 1.65E-12  | 1221 | 4413 | 7.63E-277 |
| 23865 | 78  | 348  | 78  | 196  | 9.57E-10  | 107  | 378  | 2.08E-24  |
| 23867 | 236 | 469  | 391 | 856  | 8.25E-28  | 660  | 1465 | 7.47E-36  |
| 23871 | 20  | 16   | 29  | 8    | 0.0001014 | 36   | 22   | 0.0078201 |
| 23874 | 51  | 20   | 57  | 20   | 1.58E-06  | 100  | 46   | 4.76E-09  |
| 23877 | 117 | 56   | 106 | 77   | 0.0023246 | 184  | 72   | 5.37E-19  |
| 23879 | 91  | 63   | 133 | 77   | 1.47E-06  | 141  | 56   | 1.20E-14  |
| 23886 | 61  | 39   | 131 | 54   | 3.75E-11  | 130  | 63   | 1.42E-10  |
| 23896 | 60  | 58   | 144 | 87   | 1.75E-06  | 139  | 123  | 0.0050536 |
| 23910 | 78  | 249  | 124 | 429  | 6.48E-32  | 149  | 623  | 2.08E-48  |
| 23926 | 286 | 689  | 317 | 1047 | 3.95E-71  | 670  | 1862 | 7.32E-77  |
| 23929 | 191 | 282  | 404 | 556  | 0.0053746 | 393  | 609  | 0.0011731 |
| 23934 | 25  | 69   | 20  | 74   | 4.28E-07  | 40   | 91   | 0.0014728 |
| 23943 | 106 | 72   | 212 | 124  | 1.35E-09  | 181  | 97   | 4.46E-12  |
| 23950 | 131 | 270  | 259 | 619  | 5.71E-25  | 363  | 745  | 4.66E-15  |
| 23952 | 164 | 186  | 292 | 257  | 0.0020556 | 458  | 448  | 0.0001773 |
| 23953 | 151 | 91   | 197 | 131  | 1.28E-06  | 324  | 197  | 3.44E-16  |
| 23955 | 1   | 15   | 0   | 11   | 0.0012317 | 6    | 31   | 0.0004038 |
| 23965 | 121 | 231  | 170 | 418  | 2.47E-18  | 337  | 600  | 2.30E-07  |
| 23973 | 12  | 2    | 12  | 0    | 0.0001049 | 14   | 4    | 0.0071076 |
| 23981 | 114 | 92   | 83  | 25   | 1.92E-10  | 117  | 73   | 2.38E-06  |
| 23985 | 105 | 86   | 160 | 88   | 1.57E-08  | 193  | 163  | 0.0001834 |
| 23986 | 224 | 185  | 367 | 319  | 0.0003163 | 557  | 435  | 9.44E-14  |
| 23988 | 129 | 101  | 156 | 118  | 0.000674  | 286  | 213  | 6.69E-09  |
| 23990 | 28  | 21   | 58  | 18   | 1.89E-07  | 57   | 31   | 0.0001441 |
| 23991 | 125 | 128  | 201 | 160  | 0.0005914 | 208  | 199  | 0.0060522 |
| 23993 | 10  | 1    | 20  | 0    | 2.33E-07  | 23   | 1    | 1.03E-07  |
| 23997 | 32  | 127  | 40  | 203  | 6.39E-23  | 93   | 304  | 6.57E-18  |
| 23998 | 158 | 163  | 278 | 246  | 0.0033188 | 281  | 270  | 0.0017286 |
| 24000 | 119 | 215  | 129 | 216  | 0.000654  | 289  | 462  | 0.0013805 |
| 24003 | 58  | 47   | 104 | 76   | 0.0027653 | 127  | 81   | 1.68E-06  |
| 24006 | 43  | 32   | 90  | 31   | 6.90E-10  | 103  | 37   | 2.66E-12  |
| 24024 | 65  | 65   | 105 | 62   | 2.53E-05  | 117  | 101  | 0.0062809 |
| 24028 | 107 | 97   | 154 | 114  | 0.0004613 | 144  | 113  | 0.0001994 |
| 24029 | 131 | 102  | 138 | 44   | 1.65E-15  | 234  | 153  | 2.20E-10  |
| 24035 | 84  | 54   | 47  | 9    | 9.46E-09  | 98   | 58   | 3.64E-06  |
| 24036 | 59  | 40   | 83  | 28   | 2.47E-09  | 99   | 57   | 2.25E-06  |
| 24047 | 58  | 33   | 71  | 17   | 6.03E-11  | 114  | 61   | 4.25E-08  |
| 24053 | 464 | 708  | 429 | 735  | 2.23E-11  | 593  | 978  | 1.41E-07  |
| 24063 | 424 | 558  | 706 | 998  | 1.90E-05  | 452  | 711  | 0.0001762 |
| 24066 | 124 | 268  | 171 | 407  | 7.80E-17  | 247  | 416  | 0.0002353 |
| 24067 | 165 | 116  | 215 | 189  | 0.00817   | 329  | 214  | 3.40E-14  |
| 24079 | 81  | 32   | 148 | 56   | 8.08E-14  | 230  | 75   | 4.48E-28  |
| 24083 | 90  | 215  | 69  | 349  | 2.33E-38  | 109  | 327  | 7.06E-17  |
| 24090 | 509 | 302  | 783 | 673  | 4.45E-08  | 339  | 302  | 1.41E-05  |
| 24095 | 334 | 454  | 378 | 573  | 2.32E-05  | 654  | 1075 | 4.94E-08  |
| 24105 | 405 | 324  | 301 | 177  | 7.67E-13  | 485  | 285  | 2.85E-25  |
| 24107 | 55  | 57   | 151 | 87   | 2.23E-07  | 93   | 56   | 1.04E-05  |
| 24117 | 34  | 61   | 38  | 108  | 4.50E-07  | 61   | 132  | 0.0003632 |
| 24122 | 72  | 60   | 55  | 35   | 0.0059786 | 100  | 67   | 6.34E-05  |
| 24127 | 369 | 354  | 371 | 220  | 3.82E-15  | 721  | 604  | 1.95E-13  |

|       |     |      |     |      |           |      |      |           |
|-------|-----|------|-----|------|-----------|------|------|-----------|
| 24133 | 66  | 38   | 45  | 11   | 2.83E-07  | 64   | 32   | 1.22E-05  |
| 24140 | 27  | 16   | 47  | 23   | 0.000691  | 77   | 25   | 1.88E-10  |
| 24144 | 26  | 25   | 26  | 8    | 0.0004743 | 53   | 37   | 0.0057466 |
| 24152 | 118 | 38   | 138 | 12   | 2.16E-32  | 174  | 55   | 2.45E-22  |
| 24155 | 88  | 66   | 132 | 35   | 1.30E-17  | 135  | 105  | 0.0002579 |
| 24157 | 97  | 91   | 127 | 89   | 0.0003706 | 212  | 193  | 0.0013416 |
| 24221 | 819 | 1961 | 960 | 2183 | 4.77E-75  | 1639 | 3219 | 5.54E-51  |
| 24222 | 167 | 218  | 211 | 314  | 0.0033507 | 308  | 486  | 0.0016643 |
| 24227 | 41  | 108  | 15  | 75   | 3.76E-09  | 117  | 283  | 8.40E-10  |
| 24229 | 17  | 47   | 7   | 31   | 0.0004685 | 12   | 69   | 2.89E-08  |
| 24237 | 129 | 77   | 178 | 78   | 1.47E-13  | 225  | 170  | 4.80E-07  |
| 24241 | 2   | 33   | 1   | 77   | 7.38E-20  | 8    | 108  | 4.17E-19  |
| 24243 | 54  | 683  | 89  | 1300 | 5.02E-242 | 152  | 2005 | 0         |
| 24268 | 512 | 2176 | 706 | 3004 | 1.34E-270 | 1065 | 5516 | 0         |
| 24284 | 41  | 135  | 51  | 180  | 1.57E-14  | 83   | 263  | 6.21E-15  |
| 24294 | 1   | 21   | 3   | 25   | 7.97E-05  | 5    | 79   | 8.79E-15  |
| 24310 | 120 | 88   | 139 | 63   | 2.80E-10  | 229  | 121  | 2.42E-15  |
| 24316 | 2   | 5    | 16  | 2    | 0.0004473 | 50   | 29   | 0.0009071 |
| 24330 | 17  | 126  | 58  | 260  | 5.15E-26  | 47   | 311  | 7.29E-37  |
| 24333 | 137 | 298  | 205 | 386  | 5.22E-09  | 237  | 581  | 2.09E-19  |
| 24336 | 203 | 106  | 264 | 120  | 2.43E-18  | 373  | 233  | 1.84E-17  |
| 24345 | 56  | 44   | 118 | 73   | 3.14E-05  | 119  | 62   | 8.00E-09  |
| 24353 | 0   | 25   | 1   | 28   | 4.67E-07  | 9    | 64   | 8.21E-09  |
| 24364 | 58  | 36   | 88  | 25   | 1.64E-11  | 124  | 66   | 7.70E-09  |
| 24365 | 44  | 50   | 84  | 44   | 1.75E-05  | 96   | 74   | 0.0015194 |
| 24367 | 181 | 414  | 337 | 594  | 1.60E-10  | 395  | 696  | 5.52E-08  |
| 24370 | 73  | 40   | 113 | 83   | 0.0020394 | 150  | 70   | 1.11E-12  |
| 24385 | 96  | 59   | 93  | 34   | 1.81E-09  | 108  | 80   | 0.0003969 |
| 24388 | 98  | 65   | 85  | 55   | 0.0009051 | 163  | 105  | 6.88E-08  |
| 24389 | 3   | 10   | 0   | 12   | 0.0006424 | 1    | 14   | 0.002912  |
| 24396 | 182 | 33   | 201 | 49   | 5.21E-28  | 200  | 36   | 7.88E-38  |
| 24400 | 59  | 41   | 134 | 81   | 4.03E-06  | 97   | 64   | 6.40E-05  |
| 24405 | 281 | 196  | 385 | 239  | 4.14E-14  | 770  | 486  | 1.47E-33  |
| 24406 | 164 | 138  | 238 | 191  | 0.0002746 | 368  | 246  | 9.99E-15  |
| 24410 | 138 | 108  | 150 | 91   | 1.47E-06  | 310  | 218  | 3.74E-11  |
| 24440 | 0   | 57   | 0   | 102  | 2.01E-28  | 11   | 184  | 1.28E-33  |
| 24441 | 129 | 96   | 173 | 98   | 1.55E-08  | 228  | 149  | 3.55E-10  |
| 24444 | 36  | 107  | 74  | 180  | 1.59E-08  | 125  | 229  | 0.0006068 |
| 24445 | 49  | 36   | 28  | 10   | 0.0009309 | 36   | 12   | 2.72E-05  |
| 24447 | 170 | 285  | 238 | 483  | 1.40E-13  | 395  | 617  | 0.0007051 |
| 24463 | 119 | 119  | 221 | 180  | 0.0006557 | 293  | 210  | 4.58E-10  |
| 24479 | 75  | 165  | 102 | 207  | 1.46E-06  | 179  | 351  | 8.92E-07  |
| 24482 | 144 | 117  | 154 | 113  | 0.0003557 | 160  | 130  | 0.0002362 |
| 24497 | 246 | 412  | 307 | 593  | 3.27E-14  | 155  | 369  | 4.95E-12  |
| 24502 | 91  | 230  | 167 | 283  | 5.64E-05  | 94   | 195  | 5.27E-05  |
| 24503 | 282 | 821  | 348 | 867  | 1.78E-37  | 763  | 1773 | 9.20E-49  |
| 24507 | 42  | 119  | 45  | 196  | 1.58E-19  | 76   | 296  | 5.20E-22  |
| 24509 | 103 | 96   | 138 | 95   | 0.0001303 | 255  | 155  | 4.67E-13  |
| 24522 | 127 | 102  | 164 | 132  | 0.0029028 | 213  | 121  | 9.87E-13  |
| 24528 | 129 | 56   | 176 | 58   | 6.01E-19  | 292  | 98   | 2.11E-34  |
| 24542 | 287 | 301  | 283 | 212  | 2.61E-06  | 449  | 443  | 0.0003085 |
| 24544 | 128 | 276  | 231 | 487  | 4.69E-15  | 351  | 593  | 9.47E-06  |
| 24546 | 140 | 278  | 283 | 433  | 0.0001514 | 363  | 580  | 0.0003085 |
| 24560 | 49  | 32   | 84  | 43   | 1.07E-05  | 163  | 86   | 2.58E-11  |
| 24563 | 19  | 10   | 31  | 5    | 1.81E-06  | 42   | 18   | 7.27E-05  |
| 24577 | 20  | 134  | 13  | 215  | 8.35E-43  | 33   | 336  | 1.51E-50  |
| 24583 | 4   | 101  | 13  | 167  | 4.16E-31  | 16   | 311  | 1.93E-58  |
| 24589 | 370 | 722  | 529 | 1024 | 1.55E-23  | 886  | 1576 | 5.42E-17  |
| 24596 | 125 | 107  | 195 | 142  | 3.95E-05  | 211  | 186  | 0.0004763 |
| 24602 | 70  | 141  | 51  | 132  | 2.44E-07  | 133  | 263  | 1.60E-05  |
| 24603 | 15  | 34   | 30  | 96   | 1.49E-07  | 45   | 122  | 5.05E-06  |
| 24612 | 39  | 173  | 83  | 336  | 3.41E-30  | 95   | 400  | 6.02E-32  |
| 24614 | 1   | 21   | 0   | 43   | 2.20E-12  | 1    | 89   | 1.56E-21  |
| 24620 | 366 | 280  | 477 | 412  | 2.59E-05  | 739  | 190  | 3.84E-107 |
| 24632 | 18  | 71   | 29  | 83   | 9.96E-06  | 52   | 120  | 0.0002097 |
| 24635 | 25  | 89   | 28  | 97   | 2.59E-08  | 77   | 230  | 4.31E-12  |

|       |      |      |      |      |           |      |      |           |
|-------|------|------|------|------|-----------|------|------|-----------|
| 24636 | 3    | 27   | 5    | 40   | 5.58E-07  | 25   | 60   | 0.0060802 |
| 24646 | 170  | 102  | 222  | 113  | 5.55E-13  | 127  | 75   | 1.71E-07  |
| 24668 | 139  | 113  | 140  | 66   | 7.27E-10  | 214  | 159  | 4.92E-07  |
| 24688 | 74   | 48   | 84   | 60   | 0.0056718 | 103  | 87   | 0.0067871 |
| 24702 | 47   | 43   | 58   | 38   | 0.0075937 | 70   | 49   | 0.0016333 |
| 24703 | 39   | 21   | 29   | 11   | 0.001253  | 47   | 19   | 1.61E-05  |
| 24704 | 64   | 49   | 79   | 22   | 1.48E-10  | 84   | 57   | 0.0003381 |
| 24705 | 107  | 72   | 110  | 43   | 3.16E-10  | 183  | 74   | 3.67E-18  |
| 24708 | 92   | 170  | 105  | 172  | 0.0037967 | 175  | 287  | 0.005677  |
| 24709 | 25   | 94   | 21   | 144  | 2.52E-20  | 62   | 223  | 2.84E-15  |
| 24711 | 111  | 84   | 83   | 34   | 1.26E-07  | 114  | 84   | 0.0001897 |
| 24712 | 84   | 45   | 129  | 52   | 2.28E-11  | 133  | 86   | 1.16E-06  |
| 24722 | 88   | 80   | 151  | 79   | 8.82E-09  | 184  | 124  | 7.65E-08  |
| 24725 | 29   | 36   | 70   | 30   | 2.80E-06  | 87   | 58   | 0.0001575 |
| 24736 | 156  | 128  | 244  | 145  | 2.09E-10  | 212  | 153  | 1.55E-07  |
| 24764 | 71   | 47   | 75   | 24   | 6.29E-09  | 124  | 84   | 9.88E-06  |
| 24781 | 36   | 30   | 29   | 14   | 0.0085772 | 45   | 25   | 0.0010202 |
| 24782 | 77   | 42   | 105  | 28   | 3.38E-14  | 157  | 74   | 5.31E-13  |
| 24783 | 66   | 56   | 89   | 66   | 0.007747  | 168  | 99   | 1.09E-09  |
| 24784 | 14   | 4    | 11   | 0    | 0.0002251 | 31   | 6    | 1.07E-06  |
| 24785 | 52   | 39   | 89   | 29   | 2.22E-10  | 76   | 56   | 0.0027583 |
| 24790 | 188  | 351  | 417  | 683  | 7.18E-09  | 479  | 779  | 8.17E-06  |
| 24793 | 2    | 33   | 10   | 53   | 3.83E-07  | 12   | 77   | 6.15E-10  |
| 24797 | 175  | 102  | 216  | 118  | 4.19E-11  | 236  | 119  | 5.95E-17  |
| 24802 | 11   | 199  | 28   | 366  | 9.51E-67  | 31   | 614  | 1.04E-114 |
| 24808 | 14   | 59   | 50   | 112  | 5.29E-05  | 18   | 52   | 0.0016245 |
| 24819 | 316  | 185  | 446  | 258  | 4.72E-19  | 575  | 234  | 3.18E-53  |
| 24825 | 49   | 37   | 141  | 91   | 1.70E-05  | 140  | 96   | 3.98E-06  |
| 24827 | 100  | 113  | 175  | 103  | 4.95E-08  | 228  | 186  | 1.26E-05  |
| 24829 | 663  | 394  | 1152 | 687  | 2.81E-43  | 994  | 561  | 2.59E-54  |
| 24838 | 202  | 506  | 422  | 1023 | 1.91E-41  | 695  | 1150 | 7.81E-09  |
| 24844 | 2005 | 1444 | 2965 | 2466 | 4.45E-32  | 3334 | 2012 | 1.69E-154 |
| 24845 | 48   | 28   | 81   | 39   | 5.47E-06  | 65   | 45   | 0.0020465 |
| 24858 | 33   | 29   | 55   | 6    | 1.43E-12  | 61   | 37   | 0.0004825 |
| 24878 | 297  | 389  | 446  | 415  | 0.0023507 | 680  | 730  | 0.0031886 |
| 24880 | 60   | 42   | 100  | 58   | 2.93E-05  | 96   | 77   | 0.0035438 |
| 24885 | 119  | 315  | 117  | 342  | 1.89E-20  | 96   | 497  | 5.98E-48  |
| 24889 | 4    | 16   | 12   | 45   | 8.73E-05  | 9    | 33   | 0.0027991 |
| 24897 | 295  | 917  | 460  | 1037 | 8.25E-36  | 841  | 2079 | 1.64E-66  |
| 24899 | 63   | 55   | 106  | 61   | 1.68E-05  | 122  | 70   | 1.20E-07  |
| 24918 | 43   | 43   | 78   | 18   | 3.90E-12  | 74   | 42   | 3.19E-05  |
| 24923 | 23   | 8    | 39   | 20   | 0.0037129 | 43   | 20   | 0.0001823 |
| 24934 | 17   | 8    | 18   | 1    | 1.81E-05  | 30   | 6    | 2.00E-06  |
| 24938 | 332  | 395  | 430  | 374  | 9.89E-05  | 575  | 616  | 0.0061052 |
| 24944 | 11   | 58   | 3    | 74   | 7.02E-17  | 11   | 116  | 1.63E-18  |
| 24946 | 0    | 14   | 0    | 31   | 5.49E-09  | 1    | 48   | 1.66E-11  |
| 24950 | 106  | 2644 | 128  | 4022 | 0         | 269  | 6266 | 0         |
| 25027 | 70   | 95   | 82   | 43   | 2.13E-05  | 167  | 156  | 0.0084002 |
| 25059 | 199  | 184  | 397  | 200  | 1.53E-22  | 291  | 194  | 4.85E-12  |
| 25069 | 767  | 144  | 1100 | 80   | 1.55E-261 | 1283 | 217  | 1.71E-241 |
| 25082 | 0    | 5    | 3    | 16   | 0.0094686 | 3    | 18   | 0.0068446 |
| 25087 | 51   | 1048 | 124  | 1491 | 2.89E-259 | 165  | 2534 | 0         |
| 25089 | 17   | 89   | 13   | 127  | 1.54E-21  | 34   | 261  | 3.05E-34  |
| 25105 | 60   | 164  | 123  | 338  | 2.05E-18  | 186  | 365  | 4.83E-07  |
| 25107 | 69   | 221  | 115  | 389  | 2.78E-28  | 193  | 536  | 3.50E-23  |
| 25126 | 140  | 135  | 242  | 216  | 0.0075872 | 268  | 201  | 2.74E-08  |
| 25128 | 101  | 66   | 149  | 84   | 1.16E-07  | 191  | 148  | 1.12E-05  |
| 25129 | 14   | 69   | 31   | 117  | 1.44E-10  | 45   | 197  | 3.90E-17  |
| 25131 | 382  | 226  | 492  | 358  | 5.41E-11  | 477  | 213  | 2.60E-39  |
| 25142 | 18   | 96   | 30   | 137  | 1.61E-14  | 32   | 266  | 1.95E-36  |
| 25143 | 0    | 12   | 0    | 29   | 2.08E-08  | 0    | 40   | 7.68E-11  |
| 25152 | 143  | 68   | 192  | 131  | 4.31E-06  | 150  | 118  | 0.0001327 |
| 25154 | 127  | 130  | 115  | 202  | 0.0002418 | 169  | 296  | 0.0005402 |
| 25158 | 100  | 194  | 153  | 446  | 4.16E-26  | 321  | 499  | 0.0028047 |
| 25159 | 374  | 401  | 489  | 370  | 1.55E-09  | 938  | 716  | 5.62E-24  |
| 25173 | 75   | 64   | 63   | 27   | 1.05E-05  | 99   | 68   | 0.0001226 |

|       |      |      |      |      |           |      |      |           |
|-------|------|------|------|------|-----------|------|------|-----------|
| 25177 | 9    | 2    | 15   | 1    | 0.0001393 | 27   | 9    | 0.0002878 |
| 25180 | 41   | 30   | 54   | 20   | 6.01E-06  | 85   | 54   | 7.62E-05  |
| 25196 | 38   | 30   | 35   | 7    | 1.25E-06  | 53   | 35   | 0.0035274 |
| 25198 | 69   | 183  | 44   | 152  | 3.81E-12  | 144  | 345  | 1.62E-11  |
| 25202 | 5    | 63   | 21   | 83   | 3.07E-08  | 14   | 151  | 4.91E-24  |
| 25206 | 92   | 41   | 160  | 47   | 2.27E-19  | 239  | 98   | 7.84E-23  |
| 25218 | 239  | 135  | 135  | 76   | 5.26E-07  | 293  | 176  | 3.07E-15  |
| 25222 | 7    | 19   | 0    | 43   | 2.20E-12  | 11   | 42   | 0.0004545 |
| 25231 | 8    | 5    | 10   | 0    | 0.000483  | 10   | 2    | 0.0077909 |
| 25347 | 137  | 332  | 100  | 265  | 6.89E-14  | 233  | 534  | 2.80E-15  |
| 25348 | 31   | 140  | 42   | 172  | 3.20E-16  | 60   | 310  | 1.51E-30  |
| 25349 | 17   | 40   | 18   | 43   | 0.0096789 | 40   | 124  | 1.50E-07  |
| 25351 | 37   | 31   | 50   | 14   | 4.29E-07  | 61   | 25   | 1.01E-06  |
| 25360 | 67   | 82   | 131  | 106  | 0.007591  | 194  | 141  | 6.53E-07  |
| 25365 | 176  | 122  | 165  | 86   | 1.22E-09  | 196  | 178  | 0.0017683 |
| 25369 | 517  | 925  | 562  | 797  | 0.0001115 | 930  | 1682 | 1.54E-19  |
| 25371 | 248  | 153  | 350  | 294  | 8.98E-05  | 464  | 294  | 1.38E-20  |
| 25373 | 234  | 790  | 503  | 1503 | 1.19E-87  | 641  | 1831 | 1.20E-79  |
| 25375 | 17   | 90   | 47   | 138  | 3.58E-09  | 50   | 124  | 3.28E-05  |
| 25382 | 63   | 34   | 105  | 51   | 2.05E-07  | 109  | 72   | 2.41E-05  |
| 25384 | 87   | 70   | 134  | 76   | 7.14E-07  | 147  | 109  | 3.01E-05  |
| 25391 | 340  | 816  | 644  | 1203 | 2.13E-24  | 957  | 2043 | 6.97E-44  |
| 25395 | 53   | 74   | 58   | 124  | 7.35E-05  | 107  | 218  | 3.35E-05  |
| 25398 | 0    | 45   | 1    | 101  | 1.57E-26  | 0    | 102  | 1.65E-26  |
| 25400 | 183  | 110  | 233  | 199  | 0.002359  | 473  | 265  | 4.48E-27  |
| 25407 | 79   | 163  | 93   | 301  | 4.84E-21  | 111  | 256  | 3.84E-08  |
| 25408 | 1    | 12   | 0    | 21   | 2.01E-06  | 5    | 36   | 2.19E-05  |
| 25413 | 4    | 35   | 11   | 80   | 3.88E-12  | 15   | 64   | 3.62E-06  |
| 25414 | 1041 | 376  | 1934 | 900  | 2.16E-119 | 2425 | 662  | 0         |
| 25421 | 40   | 100  | 79   | 236  | 5.83E-15  | 103  | 293  | 5.62E-14  |
| 25423 | 358  | 1202 | 350  | 655  | 5.14E-14  | 593  | 2038 | 5.19E-120 |
| 25429 | 39   | 23   | 53   | 29   | 0.0012186 | 56   | 28   | 4.03E-05  |
| 25448 | 23   | 71   | 27   | 80   | 6.46E-06  | 55   | 162  | 9.46E-09  |
| 25458 | 409  | 275  | 394  | 236  | 1.12E-15  | 704  | 486  | 1.10E-24  |
| 25462 | 204  | 181  | 266  | 207  | 3.19E-05  | 465  | 451  | 9.79E-05  |
| 25471 | 71   | 112  | 130  | 201  | 0.0081017 | 160  | 304  | 2.00E-05  |
| 25476 | 563  | 493  | 459  | 235  | 5.14E-25  | 491  | 378  | 7.43E-13  |
| 25478 | 59   | 190  | 69   | 172  | 1.40E-08  | 108  | 452  | 1.28E-35  |
| 25480 | 54   | 44   | 70   | 44   | 0.0018346 | 86   | 35   | 3.58E-09  |
| 25489 | 56   | 76   | 100  | 63   | 0.0002038 | 148  | 114  | 8.41E-05  |
| 25490 | 61   | 54   | 74   | 25   | 1.44E-08  | 105  | 87   | 0.0044997 |
| 25500 | 117  | 78   | 142  | 84   | 1.29E-06  | 246  | 156  | 1.17E-11  |
| 25509 | 39   | 11   | 22   | 5    | 0.0003151 | 61   | 9    | 1.50E-13  |
| 25510 | 91   | 81   | 106  | 80   | 0.0051139 | 130  | 113  | 0.0044254 |
| 25513 | 92   | 61   | 133  | 98   | 0.0009406 | 142  | 121  | 0.0018634 |
| 25519 | 12   | 8    | 27   | 7    | 0.0001108 | 28   | 9    | 0.000173  |
| 25520 | 71   | 18   | 72   | 23   | 1.08E-08  | 113  | 34   | 1.14E-15  |
| 25524 | 82   | 49   | 137  | 18   | 1.05E-27  | 175  | 91   | 2.26E-12  |
| 25527 | 114  | 223  | 90   | 341  | 1.53E-28  | 202  | 465  | 1.24E-13  |
| 25529 | 26   | 90   | 54   | 134  | 7.45E-07  | 72   | 193  | 9.64E-09  |
| 25702 | 2    | 8    | 3    | 17   | 0.0056849 | 1    | 18   | 0.0002946 |
| 25707 | 38   | 13   | 26   | 9    | 0.0010896 | 39   | 22   | 0.0027391 |
| 25711 | 98   | 57   | 144  | 48   | 1.69E-15  | 183  | 86   | 5.50E-15  |
| 25712 | 135  | 86   | 69   | 16   | 9.58E-11  | 82   | 56   | 0.0004124 |
| 25714 | 12   | 122  | 9    | 165  | 7.42E-34  | 30   | 277  | 4.76E-40  |
| 25716 | 16   | 8    | 36   | 0    | 1.15E-12  | 24   | 5    | 3.66E-05  |
| 25718 | 253  | 156  | 376  | 206  | 3.47E-18  | 353  | 238  | 6.03E-14  |
| 25724 | 1    | 26   | 0    | 10   | 0.0023681 | 1    | 26   | 4.90E-06  |
| 25727 | 8    | 28   | 9    | 41   | 4.50E-05  | 11   | 49   | 3.76E-05  |
| 25728 | 24   | 13   | 41   | 6    | 9.01E-09  | 29   | 12   | 0.000792  |
| 25731 | 158  | 83   | 150  | 54   | 7.82E-15  | 166  | 106  | 4.22E-08  |
| 25736 | 61   | 27   | 61   | 12   | 1.38E-10  | 61   | 35   | 0.0001867 |
| 25737 | 1084 | 958  | 1348 | 1092 | 1.31E-17  | 2361 | 1659 | 5.67E-75  |
| 25749 | 34   | 94   | 26   | 62   | 0.0012715 | 28   | 156  | 6.12E-17  |
| 25755 | 46   | 33   | 56   | 33   | 0.0027215 | 57   | 35   | 0.0007338 |
| 25756 | 289  | 258  | 377  | 194  | 1.34E-20  | 540  | 478  | 2.61E-08  |

|       |     |      |     |      |           |      |      |           |
|-------|-----|------|-----|------|-----------|------|------|-----------|
| 25762 | 206 | 150  | 182 | 107  | 3.18E-08  | 354  | 269  | 4.35E-10  |
| 25765 | 111 | 83   | 94  | 43   | 2.86E-07  | 132  | 92   | 1.47E-05  |
| 25767 | 20  | 52   | 17  | 83   | 6.15E-10  | 49   | 135  | 1.09E-06  |
| 25776 | 17  | 50   | 3   | 29   | 8.79E-06  | 22   | 61   | 0.0012156 |
| 25786 | 3   | 24   | 0   | 15   | 9.25E-05  | 10   | 57   | 4.13E-07  |
| 25804 | 141 | 79   | 153 | 89   | 2.81E-07  | 169  | 134  | 7.88E-05  |
| 25813 | 372 | 129  | 293 | 49   | 3.51E-51  | 297  | 122  | 4.81E-28  |
| 25816 | 56  | 27   | 54  | 15   | 9.19E-08  | 68   | 33   | 4.55E-06  |
| 25820 | 80  | 170  | 67  | 134  | 0.0001657 | 194  | 370  | 1.92E-06  |
| 25821 | 10  | 5    | 10  | 1    | 0.0040689 | 13   | 2    | 0.0010806 |
| 25825 | 99  | 34   | 120 | 43   | 2.83E-12  | 138  | 56   | 7.22E-14  |
| 25827 | 7   | 19   | 8   | 37   | 7.11E-05  | 31   | 102  | 6.98E-07  |
| 25831 | 27  | 9    | 35  | 14   | 0.0005089 | 69   | 26   | 3.44E-08  |
| 25845 | 294 | 174  | 363 | 88   | 1.75E-49  | 401  | 233  | 1.31E-21  |
| 25846 | 79  | 29   | 49  | 17   | 5.97E-06  | 138  | 37   | 1.36E-20  |
| 25864 | 9   | 90   | 0   | 88   | 1.09E-24  | 23   | 193  | 5.06E-27  |
| 25865 | 3   | 18   | 0   | 19   | 7.15E-06  | 7    | 47   | 1.37E-06  |
| 25867 | 26  | 4    | 53  | 5    | 7.81E-13  | 75   | 6    | 3.46E-20  |
| 25870 | 71  | 43   | 85  | 39   | 1.26E-06  | 142  | 44   | 7.31E-19  |
| 25871 | 42  | 12   | 88  | 21   | 2.96E-13  | 102  | 28   | 2.47E-15  |
| 25881 | 104 | 333  | 94  | 484  | 2.04E-53  | 213  | 656  | 1.21E-33  |
| 25882 | 124 | 96   | 94  | 33   | 5.43E-10  | 137  | 116  | 0.0018823 |
| 25893 | 18  | 8    | 8   | 0    | 0.0022242 | 23   | 7    | 0.0003777 |
| 25900 | 41  | 36   | 72  | 37   | 4.78E-05  | 114  | 44   | 1.68E-12  |
| 25903 | 138 | 114  | 191 | 105  | 6.49E-10  | 328  | 240  | 1.45E-10  |
| 25911 | 148 | 185  | 219 | 144  | 1.65E-07  | 284  | 241  | 7.11E-06  |
| 25919 | 55  | 28   | 67  | 15   | 9.04E-11  | 101  | 26   | 8.69E-16  |
| 25922 | 84  | 168  | 146 | 264  | 7.78E-06  | 248  | 410  | 0.0006311 |
| 25925 | 30  | 36   | 43  | 9    | 1.58E-07  | 64   | 20   | 3.59E-09  |
| 25934 | 51  | 42   | 53  | 26   | 0.0002736 | 72   | 35   | 2.09E-06  |
| 25935 | 56  | 38   | 110 | 10   | 8.92E-26  | 48   | 25   | 0.0003381 |
| 25938 | 225 | 123  | 422 | 139  | 3.60E-43  | 414  | 224  | 1.82E-25  |
| 25943 | 143 | 23   | 142 | 33   | 8.63E-21  | 220  | 38   | 2.92E-42  |
| 25947 | 375 | 1387 | 530 | 1724 | 1.37E-113 | 835  | 2835 | 2.27E-163 |
| 25951 | 69  | 36   | 72  | 26   | 7.78E-08  | 104  | 46   | 8.95E-10  |
| 25954 | 1   | 1    | 0   | 13   | 0.0003359 | 0    | 14   | 0.000485  |
| 25965 | 29  | 121  | 50  | 100  | 0.0013343 | 71   | 208  | 9.93E-11  |
| 25981 | 35  | 59   | 19  | 86   | 1.51E-09  | 29   | 98   | 6.16E-07  |
| 25984 | 44  | 91   | 64  | 150  | 9.13E-07  | 90   | 170  | 0.0017507 |
| 25986 | 39  | 56   | 26  | 91   | 7.03E-08  | 30   | 88   | 2.58E-05  |
| 25991 | 535 | 508  | 924 | 840  | 1.24E-06  | 1182 | 867  | 7.89E-34  |
| 25999 | 39  | 60   | 45  | 124  | 1.14E-07  | 60   | 121  | 0.0026742 |
| 26000 | 47  | 128  | 88  | 194  | 1.69E-07  | 137  | 306  | 1.03E-08  |
| 26002 | 60  | 28   | 49  | 29   | 0.0044139 | 72   | 29   | 5.54E-08  |
| 26003 | 189 | 129  | 260 | 189  | 1.65E-06  | 408  | 216  | 4.79E-26  |
| 26018 | 63  | 43   | 85  | 61   | 0.0060047 | 148  | 86   | 7.08E-09  |
| 26027 | 41  | 117  | 36  | 202  | 1.07E-24  | 65   | 269  | 1.64E-21  |
| 26029 | 86  | 33   | 95  | 27   | 2.05E-12  | 117  | 68   | 2.52E-07  |
| 26030 | 321 | 240  | 406 | 298  | 4.21E-09  | 535  | 402  | 4.74E-15  |
| 26031 | 92  | 43   | 54  | 15   | 9.19E-08  | 63   | 31   | 1.02E-05  |
| 26032 | 41  | 47   | 83  | 61   | 0.0093971 | 101  | 84   | 0.0060298 |
| 26035 | 373 | 1428 | 542 | 2506 | 3.98E-245 | 1036 | 3154 | 1.60E-152 |
| 26048 | 127 | 278  | 214 | 374  | 6.49E-07  | 271  | 534  | 9.06E-10  |
| 26053 | 26  | 81   | 32  | 93   | 2.23E-06  | 72   | 151  | 0.000263  |
| 26063 | 125 | 122  | 179 | 149  | 0.0039735 | 215  | 180  | 6.02E-05  |
| 26065 | 140 | 105  | 171 | 113  | 5.45E-06  | 264  | 188  | 1.98E-09  |
| 26070 | 15  | 68   | 14  | 111  | 2.31E-17  | 37   | 157  | 2.35E-13  |
| 26075 | 204 | 104  | 332 | 171  | 2.45E-18  | 451  | 332  | 1.20E-13  |
| 26077 | 286 | 189  | 398 | 280  | 2.94E-10  | 673  | 265  | 1.13E-64  |
| 26080 | 203 | 351  | 228 | 540  | 1.51E-21  | 386  | 819  | 3.75E-18  |
| 26083 | 43  | 98   | 86  | 196  | 4.35E-08  | 128  | 237  | 0.0004013 |
| 26088 | 201 | 133  | 339 | 235  | 2.40E-09  | 432  | 204  | 5.44E-33  |
| 26104 | 30  | 19   | 43  | 7    | 1.14E-08  | 53   | 28   | 0.0001831 |
| 26106 | 36  | 20   | 76  | 8    | 3.52E-17  | 81   | 30   | 1.20E-09  |
| 26107 | 438 | 857  | 571 | 929  | 3.11E-11  | 960  | 1522 | 1.49E-08  |
| 26108 | 170 | 142  | 230 | 195  | 0.0021557 | 276  | 235  | 1.21E-05  |

|       |     |      |      |      |           |      |      |           |
|-------|-----|------|------|------|-----------|------|------|-----------|
| 26109 | 150 | 78   | 127  | 24   | 1.42E-21  | 168  | 83   | 7.25E-13  |
| 26110 | 313 | 1177 | 443  | 1590 | 2.59E-119 | 813  | 2473 | 7.86E-120 |
| 26117 | 165 | 100  | 190  | 118  | 1.22E-07  | 257  | 158  | 6.71E-13  |
| 26118 | 28  | 5    | 33   | 2    | 2.33E-09  | 62   | 17   | 8.44E-10  |
| 26131 | 5   | 10   | 0    | 17   | 2.56E-05  | 5    | 21   | 0.0098377 |
| 26139 | 333 | 297  | 402  | 158  | 2.16E-33  | 532  | 465  | 1.07E-08  |
| 26141 | 94  | 259  | 118  | 321  | 3.23E-17  | 224  | 408  | 6.94E-06  |
| 26144 | 206 | 746  | 314  | 852  | 3.60E-43  | 334  | 1514 | 7.50E-126 |
| 26151 | 130 | 113  | 243  | 62   | 2.58E-32  | 338  | 176  | 1.99E-22  |
| 26152 | 35  | 76   | 34   | 102  | 2.69E-07  | 77   | 189  | 3.39E-07  |
| 26160 | 24  | 50   | 14   | 39   | 0.0034972 | 36   | 98   | 3.77E-05  |
| 26171 | 2   | 18   | 0    | 22   | 1.06E-06  | 7    | 26   | 0.0079116 |
| 26184 | 129 | 8    | 165  | 4    | 5.26E-49  | 206  | 4    | 1.20E-66  |
| 26185 | 155 | 112  | 272  | 142  | 7.28E-15  | 239  | 193  | 4.92E-06  |
| 26212 | 13  | 47   | 1    | 50   | 9.84E-13  | 18   | 82   | 4.50E-08  |
| 26221 | 429 | 296  | 494  | 294  | 1.56E-19  | 657  | 455  | 6.75E-23  |
| 26225 | 959 | 954  | 1631 | 901  | 1.86E-72  | 2233 | 2241 | 6.31E-14  |
| 26228 | 26  | 260  | 23   | 224  | 4.31E-37  | 46   | 468  | 9.35E-70  |
| 26234 | 211 | 197  | 339  | 240  | 9.88E-09  | 343  | 239  | 1.70E-12  |
| 26235 | 87  | 118  | 142  | 255  | 1.42E-05  | 156  | 326  | 9.28E-08  |
| 26245 | 54  | 77   | 97   | 167  | 0.0013107 | 109  | 190  | 0.0061854 |
| 26252 | 341 | 302  | 459  | 178  | 1.22E-38  | 499  | 304  | 4.34E-24  |
| 26256 | 74  | 44   | 110  | 20   | 4.28E-19  | 109  | 63   | 6.72E-07  |
| 26257 | 22  | 7    | 45   | 1    | 2.99E-14  | 18   | 4    | 0.0004107 |
| 26258 | 21  | 52   | 17   | 74   | 3.72E-08  | 42   | 86   | 0.0096504 |
| 26264 | 133 | 277  | 97   | 419  | 1.14E-39  | 304  | 549  | 3.17E-07  |
| 26281 | 42  | 40   | 36   | 5    | 4.69E-08  | 87   | 31   | 1.57E-10  |
| 26372 | 86  | 84   | 99   | 49   | 8.49E-07  | 193  | 149  | 7.46E-06  |
| 26386 | 329 | 1706 | 587  | 3087 | 0         | 990  | 5355 | 0         |
| 26397 | 120 | 104  | 162  | 135  | 0.0062438 | 315  | 217  | 7.00E-12  |
| 26398 | 10  | 45   | 6    | 34   | 4.20E-05  | 21   | 66   | 0.0001313 |
| 26402 | 257 | 704  | 417  | 1599 | 1.17E-129 | 599  | 1860 | 9.92E-94  |
| 26440 | 47  | 226  | 34   | 111  | 1.33E-08  | 105  | 409  | 8.35E-30  |
| 26443 | 44  | 47   | 94   | 16   | 3.85E-17  | 99   | 48   | 2.48E-08  |
| 26445 | 261 | 1090 | 366  | 1339 | 5.16E-103 | 625  | 2595 | 1.15E-194 |
| 26446 | 130 | 159  | 160  | 244  | 0.0051724 | 237  | 375  | 0.0056248 |
| 26448 | 59  | 52   | 99   | 42   | 2.28E-08  | 127  | 69   | 9.00E-09  |
| 26450 | 164 | 388  | 152  | 240  | 0.0019828 | 286  | 815  | 3.53E-36  |
| 26458 | 153 | 99   | 50   | 8    | 4.27E-10  | 101  | 75   | 0.0006015 |
| 26467 | 4   | 16   | 0    | 20   | 3.79E-06  | 5    | 58   | 3.19E-10  |
| 26474 | 42  | 22   | 39   | 14   | 8.51E-05  | 56   | 38   | 0.0034728 |
| 26486 | 792 | 695  | 1057 | 979  | 1.75E-06  | 1642 | 1304 | 1.99E-35  |
| 26487 | 275 | 538  | 481  | 1083 | 2.86E-37  | 603  | 1305 | 9.11E-30  |
| 26490 | 218 | 881  | 367  | 1407 | 2.58E-114 | 689  | 2523 | 5.67E-162 |
| 26554 | 47  | 26   | 57   | 18   | 3.06E-07  | 69   | 33   | 3.07E-06  |
| 26569 | 143 | 63   | 130  | 64   | 1.29E-08  | 143  | 92   | 4.80E-07  |
| 26601 | 97  | 53   | 107  | 20   | 2.33E-18  | 116  | 69   | 5.60E-07  |
| 26611 | 319 | 185  | 325  | 80   | 8.27E-44  | 396  | 222  | 7.06E-23  |
| 26614 | 131 | 118  | 193  | 74   | 2.43E-17  | 214  | 167  | 4.04E-06  |
| 26624 | 8   | 33   | 9    | 31   | 0.0022667 | 31   | 70   | 0.0065782 |
| 26632 | 95  | 63   | 152  | 65   | 4.16E-12  | 144  | 121  | 0.0012609 |
| 26633 | 51  | 45   | 76   | 11   | 2.50E-15  | 117  | 56   | 7.76E-10  |
| 26643 | 5   | 19   | 7    | 38   | 1.65E-05  | 16   | 57   | 8.25E-05  |
| 26649 | 116 | 101  | 136  | 51   | 5.93E-13  | 209  | 178  | 0.0001469 |
| 26651 | 261 | 198  | 215  | 120  | 1.38E-10  | 370  | 370  | 0.0021122 |
| 26660 | 154 | 90   | 227  | 42   | 7.61E-38  | 250  | 89   | 7.25E-28  |
| 26661 | 97  | 214  | 83   | 147  | 0.0014655 | 131  | 429  | 8.32E-25  |
| 26668 | 58  | 106  | 62   | 155  | 8.08E-08  | 93   | 180  | 0.000627  |
| 26688 | 14  | 42   | 3    | 27   | 2.66E-05  | 10   | 54   | 1.66E-06  |
| 26691 | 86  | 125  | 155  | 65   | 1.28E-12  | 179  | 141  | 3.71E-05  |
| 26692 | 15  | 28   | 5    | 37   | 2.80E-06  | 23   | 59   | 0.0035851 |
| 26693 | 149 | 336  | 223  | 323  | 0.0077678 | 465  | 696  | 0.0034409 |
| 26697 | 210 | 160  | 278  | 135  | 2.78E-17  | 375  | 307  | 2.55E-08  |
| 26702 | 337 | 144  | 317  | 90   | 5.95E-38  | 616  | 185  | 9.28E-79  |
| 26707 | 40  | 17   | 45   | 6    | 7.51E-10  | 66   | 27   | 2.92E-07  |
| 26712 | 103 | 50   | 151  | 14   | 1.15E-34  | 100  | 47   | 8.96E-09  |



|       |      |      |      |      |           |      |      |           |
|-------|------|------|------|------|-----------|------|------|-----------|
| 26715 | 17   | 2    | 32   | 10   | 0.0001386 | 40   | 22   | 0.0019088 |
| 26727 | 148  | 102  | 152  | 56   | 1.46E-14  | 197  | 171  | 0.0004262 |
| 26743 | 60   | 52   | 44   | 19   | 0.0002172 | 110  | 96   | 0.0093902 |
| 26770 | 53   | 42   | 45   | 24   | 0.0023424 | 134  | 82   | 2.13E-07  |
| 26773 | 21   | 20   | 37   | 6    | 1.05E-07  | 45   | 22   | 0.0001896 |
| 26774 | 28   | 70   | 6    | 78   | 4.25E-15  | 43   | 114  | 1.73E-05  |
| 26777 | 129  | 193  | 171  | 369  | 1.95E-12  | 281  | 459  | 0.0004994 |
| 26791 | 167  | 119  | 209  | 165  | 0.0003402 | 425  | 243  | 1.32E-23  |
| 26804 | 239  | 615  | 414  | 589  | 0.0007048 | 602  | 1154 | 1.18E-17  |
| 26807 | 232  | 151  | 383  | 166  | 7.55E-28  | 609  | 221  | 1.61E-64  |
| 26821 | 89   | 43   | 69   | 38   | 0.0002132 | 73   | 46   | 0.0002054 |
| 26822 | 24   | 41   | 10   | 35   | 0.0008925 | 43   | 110  | 4.23E-05  |
| 26829 | 161  | 128  | 132  | 32   | 5.92E-19  | 183  | 150  | 0.0001077 |
| 26838 | 56   | 21   | 43   | 22   | 0.0017434 | 65   | 25   | 1.03E-07  |
| 26856 | 54   | 45   | 74   | 21   | 6.77E-10  | 109  | 62   | 4.13E-07  |
| 26875 | 309  | 107  | 347  | 152  | 5.41E-25  | 403  | 152  | 1.80E-41  |
| 26876 | 26   | 10   | 12   | 2    | 0.0051359 | 29   | 14   | 0.0030896 |
| 26880 | 56   | 36   | 123  | 43   | 7.26E-13  | 87   | 64   | 0.0013217 |
| 26885 | 1192 | 1202 | 1840 | 1662 | 2.22E-12  | 2257 | 2052 | 2.89E-26  |
| 26886 | 33   | 69   | 37   | 108  | 2.56E-07  | 53   | 138  | 2.69E-06  |
| 26890 | 96   | 178  | 123  | 233  | 4.51E-06  | 207  | 393  | 1.15E-06  |
| 26893 | 121  | 60   | 217  | 55   | 3.76E-29  | 217  | 113  | 5.39E-15  |
| 26906 | 2    | 7    | 0    | 11   | 0.0012317 | 1    | 18   | 0.0002946 |
| 26907 | 56   | 49   | 132  | 58   | 2.14E-10  | 142  | 101  | 1.34E-05  |
| 26910 | 122  | 40   | 201  | 59   | 5.92E-24  | 202  | 70   | 1.40E-23  |
| 26916 | 52   | 44   | 79   | 57   | 0.0076446 | 136  | 84   | 2.00E-07  |
| 26925 | 112  | 241  | 136  | 287  | 1.64E-09  | 210  | 447  | 1.24E-10  |
| 26927 | 10   | 43   | 5    | 20   | 0.0082813 | 13   | 73   | 1.15E-08  |
| 26939 | 660  | 412  | 922  | 217  | 6.48E-126 | 1207 | 613  | 1.62E-79  |
| 26964 | 197  | 1    | 252  | 0    | 2.73E-84  | 222  | 192  | 0.0001638 |
| 26970 | 108  | 93   | 127  | 91   | 0.0006565 | 205  | 143  | 5.58E-08  |
| 26971 | 185  | 191  | 219  | 124  | 1.64E-10  | 185  | 174  | 0.0066713 |
| 26977 | 35   | 23   | 56   | 20   | 2.47E-06  | 60   | 44   | 0.0074303 |
| 26985 | 691  | 484  | 840  | 305  | 2.88E-75  | 832  | 823  | 1.21E-06  |
| 27010 | 632  | 398  | 611  | 162  | 2.55E-76  | 778  | 455  | 5.94E-40  |
| 27014 | 51   | 18   | 60   | 14   | 1.37E-09  | 83   | 39   | 2.00E-07  |
| 27021 | 84   | 60   | 110  | 28   | 2.67E-15  | 121  | 52   | 1.68E-11  |
| 27034 | 56   | 149  | 43   | 82   | 0.0069503 | 103  | 233  | 3.72E-07  |
| 27045 | 229  | 186  | 250  | 128  | 2.51E-14  | 420  | 286  | 7.96E-16  |
| 27049 | 136  | 148  | 125  | 74   | 4.71E-06  | 226  | 217  | 0.0047581 |
| 27066 | 219  | 210  | 248  | 201  | 0.0002637 | 456  | 384  | 7.37E-09  |
| 27082 | 133  | 138  | 230  | 109  | 4.19E-15  | 311  | 316  | 0.007967  |
| 27093 | 232  | 142  | 183  | 82   | 2.33E-13  | 210  | 148  | 6.36E-08  |
| 27094 | 228  | 331  | 381  | 521  | 0.0092018 | 559  | 831  | 0.0020796 |
| 27102 | 30   | 8    | 49   | 2    | 3.39E-14  | 17   | 2    | 7.16E-05  |
| 27104 | 29   | 127  | 37   | 75   | 0.0043239 | 45   | 477  | 3.16E-72  |
| 27109 | 397  | 742  | 537  | 939  | 2.18E-15  | 968  | 1578 | 1.27E-10  |
| 27120 | 9    | 32   | 1    | 17   | 0.0002314 | 9    | 60   | 3.43E-08  |
| 27145 | 51   | 79   | 69   | 131  | 0.0006355 | 91   | 203  | 3.14E-06  |
| 27151 | 2007 | 937  | 2694 | 722  | 0         | 3940 | 938  | 0         |
| 27184 | 351  | 298  | 489  | 355  | 4.65E-11  | 574  | 490  | 3.33E-10  |
| 27187 | 121  | 72   | 156  | 63   | 2.30E-13  | 147  | 128  | 0.0023885 |
| 27188 | 51   | 150  | 77   | 401  | 5.93E-45  | 126  | 404  | 1.02E-22  |
| 27189 | 58   | 34   | 127  | 48   | 5.13E-12  | 106  | 87   | 0.0036486 |
| 27196 | 145  | 98   | 126  | 99   | 0.0049612 | 218  | 186  | 0.0001107 |
| 27201 | 667  | 793  | 680  | 361  | 6.95E-34  | 1017 | 1110 | 0.0012336 |
| 27223 | 42   | 76   | 19   | 51   | 0.0010949 | 43   | 115  | 1.27E-05  |
| 27227 | 90   | 84   | 96   | 58   | 9.66E-05  | 147  | 130  | 0.0036524 |
| 27235 | 51   | 185  | 79   | 184  | 5.76E-08  | 80   | 366  | 6.91E-32  |
| 27236 | 74   | 49   | 89   | 8    | 3.56E-21  | 75   | 41   | 1.34E-05  |
| 27239 | 96   | 316  | 175  | 390  | 5.22E-14  | 311  | 877  | 3.84E-38  |
| 27247 | 42   | 19   | 53   | 30   | 0.001916  | 51   | 30   | 0.0010493 |
| 27249 | 78   | 171  | 72   | 140  | 0.000246  | 159  | 272  | 0.0018952 |
| 27253 | 66   | 66   | 121  | 58   | 1.89E-08  | 82   | 64   | 0.0045058 |
| 27257 | 161  | 109  | 224  | 88   | 2.52E-19  | 309  | 204  | 5.45E-13  |
| 27270 | 29   | 32   | 21   | 6    | 0.0015091 | 56   | 26   | 1.70E-05  |

|       |      |      |      |      |           |      |      |           |
|-------|------|------|------|------|-----------|------|------|-----------|
| 27272 | 78   | 89   | 132  | 57   | 1.71E-10  | 172  | 155  | 0.003117  |
| 27280 | 3501 | 2720 | 3077 | 1940 | 3.13E-97  | 4121 | 3237 | 7.65E-90  |
| 27287 | 11   | 7    | 0    | 8    | 0.008835  | 2    | 21   | 0.0004479 |
| 27306 | 66   | 82   | 56   | 35   | 0.0044834 | 74   | 22   | 8.08E-11  |

---
