# Supplementary material
Source: PubMed Central journal article supplement (PMC2722358)
Supplement: 0902417106_ST2_PDF.pdf [file 0902417106_ST2_PDF.pdf]

**Supplemental Table 2: Summary of novel transcript analysis**

| Summary of reads, junctions and genes | Single-end 1 |       | Paired-end 1 |     | Paired-end 2 |       |
|---------------------------------------|--------------|-------|--------------|-----|--------------|-------|
|                                       | E18          | P7    | E18          | P7  | E18          | P7    |
| <b>Reads</b>                          | 2,302        | 2,689 | 621          | 746 | 794          | 1,084 |
| <b>Junctions</b>                      | 1,800        | 2,177 | 151          | 189 | 504          | 631   |
| <b>Genes*</b>                         | 1,367        | 1,596 | 143          | 172 | 448          | 536   |
| <b>Total genes</b>                    | <b>2,396</b> |       | <b>295</b>   |     | <b>811</b>   |       |

\*Numbers in this row showed how many genes the detected novel junctions belonged to.
