# Supplementary material
Source: PubMed Central journal article supplement (PMC2722358)
Supplement: 0902417106_ST3_PDF.pdf [file 0902417106_ST3_PDF.pdf]

Supplemental Table 3: Novel Transcripts

| Cluster | Chromosome | Strand | Exon Starts                | Exon Ends                  | Reads |
|---------|------------|--------|----------------------------|----------------------------|-------|
| 1015    | chr1       | -      | 158869619,158754121        | 158869711,158754176        | 1     |
| 10160   | chr17      | +      | 27696477,27698405          | 27696615,27698456          | 1     |
| 10162   | chr17      | -      | 27760031,27720156          | 27760397,27720201          | 1     |
| 10169   | chr17      | -      | 28042206,28040045,28038072 | 28042355,28040133,28038734 | 1     |
| 10173   | chr17      | +      | 28326741,28337952          | 28326897,28338078          | 1     |
| 1017    | chr1       | -      | 159034474,159029277        | 159034534,159029534        | 1     |
| 10181   | chr17      | -      | 28548978,28539553          | 28549069,28539793          | 2     |
| 10189   | chr17      | -      | 28790776,28786610          | 28790890,28787206          | 1     |
| 10204   | chr17      | +      | 29419622,29438300          | 29419836,29439826          | 1     |
|         | chr17      | +      | 29430951,29435586          | 29431106,29435710          | 3     |
| 10206   | chr17      | -      | 29476735,29469020          | 29476787,29469723          | 1     |
|         | chr17      | -      | 29477365,29470719          | 29477443,29470787          | 2     |
|         | chr17      | -      | 29484411,29475686          | 29484849,29475746          | 1     |
| 10216   | chr17      | -      | 29986584,29964902          | 29986717,29969344          | 1     |
| 10222   | chr17      | +      | 30794913,30863730          | 30795015,30863833          | 1     |
| 10234   | chr17      | +      | 31444224,31459043          | 31444306,31459210          | 2     |
|         | chr17      | +      | 31483354,31486726          | 31486640,31487643          | 1     |
| 10248   | chr17      | -      | 32295155,32293196          | 32295278,32293352          | 1     |
| 10253   | chr17      | -      | 32493367,32518028,32493367 | 32493563,32518101,32493563 | 1     |
| 10283   | chr17      | +      | 33715037,33734885          | 33715125,33735000          | 1     |
| 10286   | chr17      | -      | 33789217,33783183          | 33789271,33783604          | 1     |
|         | chr17      | -      | 33800169,33786539          | 33800230,33787342          | 2     |
| 10287   | chr17      | -      | 33828472,33831161          | 33829098,33833191          | 1     |
|         | chr17      | -      | 33839957,33831161          | 33840153,33833191          | 2     |
| 10303   | chr17      | -      | 34076968,34075853          | 34077288,34076056          | 2     |
| 10307   | chr17      | +      | 34096939,34097391          | 34097040,34097449          | 1     |
| 10312   | chr17      | -      | 34164350,34163608          | 34164467,34163650          | 2     |
| 10315   | chr17      | +      | 34186563,34189256          | 34186623,34189301          | 1     |
| 10319   | chr17      | -      | 34251294,34250514          | 34251423,34250777          | 2     |
|         | chr17      | -      | 34252306,34251294          | 34252521,34251423          | 1     |
|         | chr17      | -      | 34252612,34250876          | 34252751,34251122          | 2     |
|         | chr17      | -      | 34255550,34253142          | 34256845,34253280          | 1     |
| 10349   | chr17      | +      | 34853830,34855096          | 34853953,34855229          | 1     |
| 10350   | chr17      | -      | 34946837,34865709          | 34946921,34865988          | 1     |
|         | chr17      | -      | 34947055,34866126          | 34947154,34866210          | 1     |
| 10353   | chr17      | +      | 34974337,34975757          | 34974699,34975852          | 1     |
| 10354   | chr17      | -      | 34982593,34982112          | 34982857,34982259          | 1     |
|         | chr17      | -      | 34984352,34981559          | 34984406,34981772          | 1     |
| 10359   | chr17      | +      | 35035443,35043639          | 35035485,35043822          | 1     |
|         | chr17      | +      | 35040267,35044687          | 35040423,35044789          | 1     |
|         | chr17      | +      | 35042073,35045348          | 35042211,35045503          | 1     |
|         | chr17      | +      | 35045118,35050584          | 35045258,35050992          | 1     |
|         | chr17      | +      | 35045582,35047922          | 35045750,35048000          | 2     |
|         | chr17      | +      | 35045582,35049333          | 35045750,35049412          | 2     |
| 10367   | chr17      | +      | 35118824,35122053,35122361 | 35119030,35122084,35122838 | 1     |
| 10369   | chr17      | +      | 35141716,35149874          | 35141838,35149980          | 1     |
|         | chr17      | +      | 35141716,35150970          | 35141838,35151049          | 2     |
| 10370   | chr17      | +      | 35160309,35161487          | 35160442,35161627          | 1     |
| 10374   | chr17      | +      | 35196045,35197547          | 35196217,35197647          | 2     |
|         | chr17      | +      | 35197047,35198735          | 35197406,35199040          | 2     |
|         | chr17      | +      | 35197777,35198420          | 35197851,35198544          | 3     |
| 10380   | chr17      | +      | 35231195,35235638          | 35231281,35235753          | 1     |
|         | chr17      | +      | 35231195,35237906          | 35231281,35238030          | 2     |
|         | chr17      | +      | 35238486,35238914          | 35238550,35238977          | 1     |
| 10383   | chr17      | -      | 35254640,35257389,35255403 | 35254830,35257472,35255519 | 1     |
| 10387   | chr17      | +      | 35273059,35277766          | 35273180,35277896          | 1     |
|         | chr17      | +      | 35275316,35282081          | 35275434,35282184          | 1     |
|         | chr17      | +      | 35275967,35277177          | 35276021,35277434          | 1     |
|         | chr17      | +      | 35279442,35284085          | 35279550,35284181          | 2     |
|         | chr17      | +      | 35279671,35282970          | 35279784,35283114          | 1     |
|         | chr17      | +      | 35280277,35282273          | 35280627,35282398          | 1     |
|         | chr17      | +      | 35282550,35283701          | 35282697,35283848          | 1     |

|       |       |   |                                         |                                         |    |
|-------|-------|---|-----------------------------------------|-----------------------------------------|----|
| 10388 | chr17 | - | 35287172,35286454                       | 35287271,35286545                       | 1  |
|       | chr17 | - | 35289996,35289562,35287442              | 35290068,35289730,35287653              | 1  |
|       | chr17 | - | 35290169,35287442                       | 35290310,35287653                       | 1  |
|       | chr17 | - | 35290866,35286644                       | 35290952,35286739                       | 1  |
|       | chr17 | - | 35292310,35290169                       | 35294152,35290310                       | 1  |
|       | chr17 | - | 35295880,35287442                       | 35296358,35287653                       | 1  |
|       | chr17 | - | 35298754,35290451                       | 35298854,35290685                       | 2  |
|       | chr17 | - | 35299146,35298586                       | 35299324,35298659                       | 1  |
|       | chr17 | - | 35299816,35291736                       | 35299991,35292005                       | 1  |
| 10389 | chr17 | - | 35308358,35310085,35309229              | 35308521,35310220,35309291              | 4  |
| 1038  | chr1  | + | 162965296,162965882,162966950,162967418 | 162965325,162965935,162966983,162967446 | 9  |
|       | chr1  | + | 162966113,162968355                     | 162966145,162968403                     | 1  |
|       | chr1  | + | 162966950,162967418,162965296,162965882 | 162966983,162967446,162965325,162965935 | 5  |
|       | chr1  | + | 162966950,162967418                     | 162966983,162967446                     | 5  |
|       | chr1  | + | 162966950,162967418,162968587,162966338 | 162966983,162967446,162968668,162966710 | 2  |
|       | chr1  | + | 162966950,162967418,162968587           | 162966983,162967446,162968668           | 5  |
|       | chr1  | + | 162966950,162967635                     | 162966983,162967678                     | 3  |
|       | chr1  | + | 162968587,162966950,162967418           | 162968668,162966983,162967446           | 10 |
| 10398 | chr17 | + | 35380057,35390151                       | 35380395,35390299                       | 1  |
|       | chr17 | + | 35381080,35383881                       | 35381208,35384065                       | 2  |
|       | chr17 | + | 35381080,35389908                       | 35381208,35390053                       | 1  |
| 10416 | chr17 | - | 35808937,35805554                       | 35809042,35805602                       | 1  |
| 10419 | chr17 | + | 35961223,35969451                       | 35961314,35969732                       | 2  |
|       | chr17 | + | 35961510,35967598                       | 35961654,35967736                       | 1  |
| 1041  | chr1  | - | 163025659,163026575                     | 163025868,163029416                     | 1  |
| 10424 | chr17 | + | 36026383,36029363,36026142              | 36026545,36029613,36026305              | 1  |
| 10425 | chr17 | - | 36033924,36032228                       | 36034065,36032317                       | 1  |
| 10427 | chr17 | - | 36035332,36034546,36038312              | 36035412,36034860,36038556              | 2  |
|       | chr17 | - | 36035332,36035201                       | 36035412,36035295                       | 1  |
|       | chr17 | - | 36041234,36038312,36045797              | 36041280,36038556,36045911              | 2  |
|       | chr17 | - | 36045507,36035201                       | 36045609,36035295                       | 1  |
| 10430 | chr17 | - | 36096013,36095017                       | 36096084,36095186                       | 1  |
| 10432 | chr17 | + | 36116899,36125465                       | 36117192,36126407                       | 1  |
|       | chr17 | + | 36118251,36119891                       | 36118403,36119987                       | 1  |
| 10436 | chr17 | - | 36256133,36177169                       | 36256409,36177274                       | 1  |
| 10471 | chr17 | + | 37185365,37185365,37209797              | 37186412,37186412,37211250              | 4  |
|       | chr17 | + | 37187943,37199478                       | 37188104,37199721                       | 1  |
|       | chr17 | + | 37201604,37207598                       | 37201682,37207726                       | 1  |
| 10543 | chr17 | + | 43731237,43744183                       | 43731359,43744354                       | 1  |
|       | chr17 | + | 43733851,43748791                       | 43733945,43748990                       | 1  |
| 10554 | chr17 | + | 45128682,45185230                       | 45128769,45185341                       | 1  |
| 10558 | chr17 | + | 45654641,45655098                       | 45654779,45655207                       | 1  |
| 10567 | chr17 | - | 45798402,45800455,45798705              | 45798518,45800618,45798873              | 2  |
|       | chr17 | - | 45810108,45800455                       | 45810179,45800618                       | 1  |
|       | chr17 | - | 45816185,45814874                       | 45816265,45814965                       | 1  |
| 10575 | chr17 | + | 46298019,46305094                       | 46298275,46306317                       | 1  |
| 10577 | chr17 | + | 46372813,46378365                       | 46372950,46378503                       | 1  |
| 10583 | chr17 | + | 46434893,46435461                       | 46435027,46435647                       | 1  |
|       | chr17 | + | 46435461,46438592                       | 46435647,46438737                       | 1  |
| 10584 | chr17 | - | 46449783,46441278                       | 46449861,46441424                       | 1  |
| 10591 | chr17 | - | 46638748,46637955                       | 46639196,46638029                       | 8  |
|       | chr17 | - | 46656960,46656408                       | 46657189,46656880                       | 1  |
|       | chr17 | - | 46657430,46657721                       | 46657614,46657904                       | 3  |
|       | chr17 | - | 46666649,46647799                       | 46667105,46647999                       | 1  |
| 10593 | chr17 | - | 46708551,46703051                       | 46708632,46703230                       | 1  |
|       | chr17 | - | 46728463,46723149                       | 46728751,46723416                       | 1  |
| 10595 | chr17 | + | 46785185,46785607                       | 46785327,46785718                       | 1  |
| 10596 | chr17 | + | 46792792,46800270                       | 46792898,46800397                       | 1  |
|       | chr17 | + | 46796415,46800916                       | 46796598,46801313                       | 1  |
| 10598 | chr17 | - | 46814633,46813892                       | 46814749,46813979                       | 1  |
|       | chr17 | - | 46814880,46813264                       | 46815057,46813343                       | 3  |
|       | chr17 | - | 46814880,46813892                       | 46815057,46813979                       | 1  |
|       | chr17 | - | 46815229,46813645                       | 46815442,46813754                       | 2  |
| 10599 | chr17 | + | 46818565,46819667                       | 46818846,46820054                       | 1  |
| 10600 | chr17 | - | 46824198,46823211                       | 46824309,46823380                       | 1  |
| 10601 | chr17 | + | 46850856,46861773                       | 46851020,46861913                       | 2  |

|       |       |   |                                     |                                     |   |
|-------|-------|---|-------------------------------------|-------------------------------------|---|
| 10603 | chr17 | - | 46884369,46874675                   | 46884493,46874798                   | 1 |
| 1060  | chr1  | - | 164653240,164651575                 | 164653418,164651670                 | 2 |
| 10631 | chr17 | - | 48017086,48015555                   | 48017841,48015703                   | 1 |
| 10658 | chr17 | + | 50779440,50827036                   | 50779516,50827795                   | 1 |
|       | chr17 | + | 50779440,50827036,50827036          | 50779516,50827795,50827795          | 1 |
| 10668 | chr17 | + | 53783938,53792346,53792346,53793763 | 53784061,53792555,53792555,53793890 | 1 |
| 1067  | chr1  | - | 165185407,165182996                 | 165188073,165185357                 | 5 |
| 10684 | chr17 | + | 56129841,56130589,56130589,56134779 | 56129963,56130799,56130799,56134939 | 2 |
|       | chr17 | + | 56134779,56135843                   | 56134939,56135932                   | 1 |
| 10686 | chr17 | + | 56149699,56154363                   | 56149936,56154532                   | 2 |
|       | chr17 | + | 56149699,56154893                   | 56149936,56154983                   | 1 |
|       | chr17 | + | 56151838,56155326                   | 56151915,56155419                   | 6 |
| 10688 | chr17 | + | 56195843,56202233                   | 56195900,56202314                   | 1 |
| 10689 | chr17 | - | 56208606,56207676                   | 56208737,56208106                   | 3 |
| 10690 | chr17 | + | 56235627,56238599                   | 56235699,56238810                   | 1 |
| 10694 | chr17 | - | 56279636,56270535                   | 56279766,56270637                   | 1 |
| 1069  | chr1  | + | 165709809,165724079                 | 165710033,165724234                 | 2 |
| 10705 | chr17 | - | 56557013,56553151                   | 56557168,56553287                   | 2 |
|       | chr17 | - | 56564749,56551854                   | 56565349,56552816                   | 1 |
|       | chr17 | - | 56597614,56554307                   | 56597800,56554434                   | 1 |
| 10707 | chr17 | - | 56718343,56703926                   | 56718408,56704057                   | 1 |
|       | chr17 | - | 56722406,56702934                   | 56722494,56703047                   | 2 |
| 10709 | chr17 | + | 56739760,56745219                   | 56739855,56745286                   | 2 |
|       | chr17 | + | 56742299,56744979                   | 56742406,56745080                   | 1 |
|       | chr17 | + | 56742954,56743788                   | 56743245,56743831                   | 1 |
|       | chr17 | + | 56743568,56744706,56742954          | 56743706,56744822,56743245          | 1 |
|       | chr17 | + | 56743568,56745219                   | 56743706,56745286                   | 1 |
| 10712 | chr17 | - | 56757176,56754296                   | 56757355,56754514                   | 1 |
|       | chr17 | - | 56757176,56755552,56755348          | 56757355,56755675,56755465          | 2 |
|       | chr17 | - | 56759408,56754058                   | 56759492,56754223                   | 1 |
|       | chr17 | - | 56759936,56757176                   | 56759998,56757355                   | 1 |
|       | chr17 | - | 56761346,56754672                   | 56761581,56754838                   | 1 |
| 10715 | chr17 | + | 56846284,56849510                   | 56849206,56849653                   | 1 |
|       | chr17 | + | 56846585,56850013                   | 56846661,56850200                   | 1 |
| 10719 | chr17 | + | 56907205,56908228                   | 56907358,56908325                   | 1 |
| 10720 | chr17 | - | 56944780,56924070                   | 56944870,56924189                   | 1 |
| 10725 | chr17 | + | 57130028,57132248,57129731          | 57130100,57132436,57129936          | 3 |
|       | chr17 | + | 57130028,57132248,57132248,57132870 | 57130100,57132436,57132436,57132976 | 2 |
| 10726 | chr17 | + | 57137811,57138352                   | 57137985,57138745                   | 2 |
| 10728 | chr17 | - | 57144782,57143731                   | 57144967,57143851                   | 1 |
|       | chr17 | - | 57146408,57143544                   | 57146579,57143618                   | 1 |
|       | chr17 | - | 57149110,57143143                   | 57149183,57143234                   | 1 |
| 10731 | chr17 | - | 57195658,57194696                   | 57197657,57194808                   | 4 |
|       | chr17 | - | 57198943,57196004                   | 57199286,57196092                   | 1 |
| 10760 | chr17 | - | 64642179,64630354                   | 64642365,64632887                   | 1 |
| 10762 | chr17 | + | 65061591,65080543                   | 65061813,65080677                   | 1 |
| 10764 | chr17 | - | 65785602,65752167                   | 65785726,65752346                   | 1 |
| 10772 | chr17 | - | 66386137,66391872                   | 66386979,66391941                   | 9 |
| 10849 | chr17 | - | 67042802,67016882                   | 67042938,67017021                   | 3 |
| 10861 | chr17 | + | 70942506,71158411                   | 70945085,71158619                   | 1 |
| 10872 | chr17 | - | 71698929,71695849                   | 71699088,71698340                   | 3 |
|       | chr17 | - | 71798071,71739766                   | 71798186,71739855                   | 1 |
| 10887 | chr17 | - | 73854781,73844941                   | 73854865,73845061                   | 1 |
| 10892 | chr17 | - | 74600045,74624771,74601600          | 74600665,74624914,74601705          | 1 |
| 10895 | chr17 | + | 74814959,74822356,74822356          | 74815062,74823569,74823569          | 1 |
| 10898 | chr17 | + | 74978504,75089697                   | 74979902,75089808                   | 1 |
| 10899 | chr17 | + | 75234672,75262673                   | 75234725,75262908                   | 1 |
| 10915 | chr17 | - | 79330649,79318342                   | 79330836,79319357                   | 1 |
| 10916 | chr17 | + | 79337880,79342592                   | 79337961,79342651                   | 1 |
| 10929 | chr17 | - | 80599419,80603652,80602030          | 80600942,80603727,80602084          | 1 |
|       | chr17 | - | 80603652,80602030                   | 80603727,80602084                   | 1 |
|       | chr17 | - | 80604601,80599419                   | 80604778,80600942                   | 1 |
| 1092  | chr1  | - | 167352986,167263419                 | 167353172,167263525                 | 1 |
| 10932 | chr17 | - | 80650571,80651740                   | 80651504,80652627                   | 1 |
|       | chr17 | - | 80651740,80650571                   | 80652627,80651504                   | 1 |
| 10939 | chr17 | + | 81343971,81400169                   | 81344428,81401156                   | 1 |

|       |       |   |                                     |                                     |   |
|-------|-------|---|-------------------------------------|-------------------------------------|---|
| 1093  | chr1  | + | 167405084,167411033                 | 167405125,167411345                 | 2 |
| 10954 | chr17 | + | 85006160,85010977                   | 85006302,85011107                   | 1 |
| 10955 | chr17 | + | 85030975,85046985                   | 85031010,85047056                   | 1 |
|       | chr17 | + | 85030975,85048555                   | 85031010,85048653                   | 1 |
| 10958 | chr17 | - | 85139883,85106433                   | 85140008,85106518                   | 4 |
|       | chr17 | - | 85149847,85112032,85109874          | 85149933,85112234,85110014          | 1 |
|       | chr17 | - | 85166332,85155597                   | 85166451,85155625                   | 1 |
|       | chr17 | - | 85176280,85105238                   | 85176474,85105381                   | 1 |
| 10959 | chr17 | - | 85356539,85354309                   | 85356763,85354648                   | 1 |
| 10967 | chr17 | - | 86450425,86387664                   | 86450508,86387849                   | 1 |
| 10969 | chr17 | + | 86874854,86895277                   | 86874889,86895451                   | 1 |
| 10974 | chr17 | - | 87419740,87396598,87421198          | 87419857,87396907,87421290          | 4 |
| 10985 | chr17 | + | 88388483,88389533                   | 88388601,88389688                   | 1 |
| 10986 | chr17 | - | 88400111,88392486                   | 88400197,88392594                   | 1 |
| 10995 | chr17 | - | 90561453,91491938,90561453          | 90561773,91492142,90561773          | 1 |
|       | chr17 | - | 90762099,91394800,90960080          | 90762281,91394818,90960200          | 3 |
|       | chr17 | - | 91020142,90964644                   | 91022963,90964818                   | 2 |
|       | chr17 | - | 91020142,90988010                   | 91022963,90988201                   | 1 |
|       | chr17 | - | 91020204,90762099                   | 91020231,90762281                   | 1 |
|       | chr17 | - | 91491938,90561453                   | 91492142,90561773                   | 1 |
|       | chr17 | - | 91491938,90563131                   | 91492142,90563221                   | 1 |
| 11018 | chr18 | + | 3421200,3431481                     | 3421363,3431583                     | 1 |
| 11023 | chr18 | + | 4386168,4395153                     | 4386380,4395227                     | 1 |
| 11028 | chr18 | - | 5583710,5566661                     | 5583794,5567588                     | 1 |
| 11032 | chr18 | - | 6225315,6220221                     | 6225440,6220290                     | 1 |
|       | chr18 | - | 6225765,6202223                     | 6225821,6203705                     | 1 |
|       | chr18 | - | 6225765,6220799                     | 6225821,6220993                     | 1 |
|       | chr18 | - | 6227585,6202223                     | 6227659,6203705                     | 3 |
| 11041 | chr18 | + | 7901493,7916049                     | 7901600,7916295                     | 1 |
| 11044 | chr18 | - | 9449515,9377791,9353404,9349385     | 9450148,9377826,9353505,9349421     | 7 |
| 11047 | chr18 | + | 9960483,9970252                     | 9960550,9970326                     | 1 |
| 11048 | chr18 | - | 10009350,10004893                   | 10010080,10005008                   | 1 |
| 11049 | chr18 | - | 10132125,10116771                   | 10132270,10116857                   | 1 |
| 11054 | chr18 | + | 10815733,10817816                   | 10817731,10818702                   | 1 |
| 11063 | chr18 | + | 12295201,12313728                   | 12295347,12315876                   | 1 |
| 11064 | chr18 | + | 12330057,12347521                   | 12330142,12347590                   | 1 |
| 11065 | chr18 | - | 12369994,12360072                   | 12370365,12360255                   | 1 |
| 11081 | chr18 | - | 15556599,15551337                   | 15556764,15552238                   | 1 |
| 1108  | chr1  | - | 169166733,169156216                 | 169166830,169156652                 | 1 |
| 11107 | chr18 | - | 22910427,22851913,22851913          | 22910541,22853635,22853635          | 3 |
| 11108 | chr18 | + | 23762465,23791718,23762465          | 23762732,23792927,23762732          | 2 |
| 11120 | chr18 | + | 24765357,24775901                   | 24765436,24775997                   | 2 |
|       | chr18 | + | 24789859,24793401                   | 24790052,24793509                   | 2 |
|       | chr18 | + | 24796894,24791259,24796894          | 24797331,24791381,24797331          | 1 |
| 11122 | chr18 | + | 24928983,25291411                   | 24930037,25292002                   | 1 |
| 11126 | chr18 | - | 25654722,25645294                   | 25654806,25645466                   | 2 |
|       | chr18 | - | 25654722,25649641                   | 25654806,25649725                   | 5 |
|       | chr18 | - | 25661433,25645294                   | 25661581,25645466                   | 1 |
|       | chr18 | - | 25911842,25637615                   | 25912658,25638212                   | 1 |
|       | chr18 | - | 25911842,25662989                   | 25912658,25663069                   | 1 |
|       | chr18 | - | 25911842,25663390,25911842          | 25912658,25663519,25912658          | 1 |
| 11132 | chr18 | + | 30436625,30463219                   | 30436769,30463310                   | 1 |
|       | chr18 | + | 30441610,30507376                   | 30441740,30507774                   | 1 |
|       | chr18 | + | 30462573,30492814                   | 30462728,30492983                   | 2 |
| 11140 | chr18 | + | 31963743,32062235                   | 31963908,32062331                   | 1 |
| 11147 | chr18 | + | 32322742,32368295                   | 32323204,32368375                   | 1 |
| 11148 | chr18 | + | 32420955,32426817                   | 32421052,32426970                   | 2 |
|       | chr18 | + | 32425271,32429411                   | 32425390,32429801                   | 1 |
| 11150 | chr18 | + | 32572074,32591977                   | 32572129,32592079                   | 1 |
|       | chr18 | + | 32574598,32584473                   | 32574691,32584621                   | 1 |
|       | chr18 | + | 32585877,32589353,32591324          | 32586006,32589377,32591396          | 4 |
|       | chr18 | + | 32585877,32591977                   | 32586006,32592079                   | 1 |
|       | chr18 | + | 32589353,32591324,32591977          | 32589377,32591396,32592079          | 4 |
|       | chr18 | + | 32591636,32589353,32591324          | 32591747,32589377,32591396          | 2 |
|       | chr18 | + | 32591977,32594788,32584473,32591636 | 32592079,32595394,32584621,32591747 | 2 |
|       | chr18 | + | 32591977,32594788,32589353,32591636 | 32592079,32595394,32589377,32591747 | 2 |

|       |       |   |                                     |                                     |    |
|-------|-------|---|-------------------------------------|-------------------------------------|----|
| 11164 | chr18 | - | 34608021,34605185,34604930          | 34608105,34605269,34605094          | 1  |
|       | chr18 | - | 34653810,34617317                   | 34653952,34617528                   | 2  |
| 11177 | chr18 | + | 34952657,34956441                   | 34952825,34956566                   | 1  |
| 11178 | chr18 | + | 35004905,35005598                   | 35005026,35005746                   | 1  |
|       | chr18 | + | 35005228,35005440                   | 35005342,35005746                   | 2  |
|       | chr18 | + | 35005440,35005228                   | 35005746,35005342                   | 2  |
| 11185 | chr18 | - | 35658444,35500751                   | 35658520,35500851                   | 1  |
| 11186 | chr18 | + | 35716269,35716990                   | 35716884,35717970                   | 3  |
| 11187 | chr18 | + | 35731496,35747284                   | 35732589,35747507                   | 2  |
|       | chr18 | + | 35737211,35747284                   | 35737273,35747507                   | 1  |
|       | chr18 | + | 35744168,35747284,35747284,35750033 | 35744535,35747507,35747507,35751063 | 1  |
|       | chr18 | + | 35747284,35750406                   | 35747507,35752665                   | 1  |
|       | chr18 | + | 35750033,35747284,35750033          | 35751063,35747507,35751063          | 2  |
| 11199 | chr18 | + | 36162577,36166214                   | 36162667,36166372                   | 1  |
| 11207 | chr18 | + | 36792003,36802579                   | 36792115,36802748                   | 1  |
| 11211 | chr18 | - | 36834603,36835824,36834934          | 36834795,36835909,36835050          | 5  |
| 11220 | chr18 | - | 36930749,36929735                   | 36930848,36929978                   | 1  |
| 11222 | chr18 | + | 36953950,36955690                   | 36954044,36955764                   | 1  |
| 11223 | chr18 | + | 37152120,37984674                   | 37154502,37984733                   | 1  |
|       | chr18 | + | 37157533,37098971                   | 37160014,37101359                   | 1  |
|       | chr18 | + | 37164973,37318918                   | 37167355,37319007                   | 2  |
|       | chr18 | + | 37303622,37344599                   | 37306184,37347311                   | 1  |
|       | chr18 | + | 37911432,37901747                   | 37913847,37904312                   | 1  |
| 11251 | chr18 | - | 38103782,38096624                   | 38103863,38097337                   | 1  |
|       | chr18 | - | 38114512,38101361                   | 38114642,38101420                   | 1  |
| 11252 | chr18 | + | 38117667,38118412                   | 38118043,38118819                   | 1  |
| 11253 | chr18 | - | 38123967,38122226                   | 38124072,38122447                   | 1  |
|       | chr18 | - | 38129008,38127413                   | 38129106,38127549                   | 1  |
| 11267 | chr18 | + | 39466671,39522236,39466671          | 39467026,39522508,39467026          | 2  |
| 1126  | chr1  | - | 172091497,172073527                 | 172091702,172073594                 | 2  |
| 11279 | chr18 | - | 42387659,42362002                   | 42387872,42362372                   | 1  |
|       | chr18 | - | 42394234,42389595                   | 42394375,42389681                   | 2  |
| 11283 | chr18 | + | 42695831,42713061                   | 42696032,42713151                   | 1  |
|       | chr18 | + | 42695831,42720587                   | 42696032,42720706                   | 1  |
| 11285 | chr18 | - | 42891440,42822763,42808327          | 42891553,42822933,42808419          | 4  |
|       | chr18 | - | 43218815,43218815,43058398          | 43219125,43219125,43058643          | 1  |
| 11289 | chr18 | - | 43514396,43504759                   | 43514458,43504828                   | 2  |
|       | chr18 | - | 43517887,43485378                   | 43518052,43485541                   | 15 |
|       | chr18 | - | 43517887,43493534                   | 43518052,43493691                   | 5  |
|       | chr18 | - | 43523156,43493534                   | 43523245,43493691                   | 1  |
|       | chr18 | - | 43532719,43487978                   | 43532926,43488158                   | 1  |
|       | chr18 | - | 43597483,43504759                   | 43597891,43504828                   | 1  |
|       | chr18 | - | 43597483,43514396                   | 43597891,43514458                   | 1  |
| 11290 | chr18 | - | 43709269,43700239                   | 43709347,43700305                   | 2  |
|       | chr18 | - | 43722922,43718747,43717793          | 43723006,43718846,43717892          | 5  |
|       | chr18 | - | 43722922,43718747,43726744,43725516 | 43723006,43718846,43726864,43725645 | 1  |
|       | chr18 | - | 43725516,43722922,43718747          | 43725645,43723006,43718846          | 7  |
|       | chr18 | - | 43731505,43718747                   | 43731652,43718846                   | 1  |
| 11305 | chr18 | + | 45014997,45017841                   | 45015078,45017947                   | 1  |
| 11317 | chr18 | - | 46887626,46879940                   | 46887996,46880095                   | 1  |
| 11319 | chr18 | + | 46949550,46917656,46949550          | 46950480,46917768,46950480          | 1  |
| 1131  | chr1  | - | 172486834,172250552                 | 172487241,172250718                 | 1  |
| 11323 | chr18 | - | 47438769,47404907                   | 47438828,47409238                   | 1  |
| 11334 | chr18 | - | 50202635,50211330                   | 50202739,50212155                   | 1  |
| 11348 | chr18 | + | 53357839,53372406                   | 53357883,53372612                   | 2  |
|       | chr18 | + | 53359410,53369241                   | 53359552,53369317                   | 1  |
| 1134  | chr1  | - | 172815197,172804318                 | 172815671,172804701                 | 1  |
| 11354 | chr18 | + | 54107701,54112898,54091844          | 54107808,54115338,54091993          | 2  |
| 11356 | chr18 | - | 55149481,55054873                   | 55149567,55055291                   | 1  |
| 11372 | chr18 | + | 58037368,58057712                   | 58039198,58057808                   | 1  |
| 11385 | chr18 | + | 60705874,60712498                   | 60705987,60712606                   | 1  |
| 11392 | chr18 | - | 61008404,60993073                   | 61008562,60993286                   | 1  |
| 11395 | chr18 | - | 61155033,61160945,61155033          | 61156485,61161046,61156485          | 1  |
| 11406 | chr18 | + | 61715235,61736160                   | 61715527,61736239                   | 1  |
|       | chr18 | + | 61739992,61747079                   | 61741916,61747953                   | 1  |
| 11416 | chr18 | - | 61918253,61895221                   | 61918382,61895400                   | 1  |

|       |       |   |                                     |                                     |   |
|-------|-------|---|-------------------------------------|-------------------------------------|---|
| 11423 | chr18 | - | 62670363,62667487,62679407,62670667 | 62670466,62667654,62679621,62670768 | 1 |
| 11442 | chr18 | - | 64671264,64668898                   | 64671354,64668969                   | 1 |
| 11444 | chr18 | + | 65048682,65369306                   | 65048704,65369403                   | 1 |
|       | chr18 | + | 65345979,65363529                   | 65346038,65363603                   | 2 |
|       | chr18 | + | 65354713,65372437                   | 65354835,65372961                   | 2 |
| 1148  | chr1  | - | 173164990,173166487,173164990       | 173165218,173166571,173165218       | 1 |
|       | chr1  | - | 173167270,173166487,173164990       | 173167400,173166571,173165218       | 2 |
|       | chr1  | - | 173168417,173166736                 | 173168503,173166832                 | 1 |
| 1150  | chr1  | + | 173206236,173204083,173206012       | 173207026,173204274,173206117       | 1 |
| 1153  | chr1  | - | 173218694,173224764,173219648       | 173219102,173224958,173219725       | 1 |
|       | chr1  | - | 173219648,173218694,173220279       | 173219725,173219102,173220347       | 4 |
| 11613 | chr18 | + | 67294965,67378157                   | 67295020,67378225                   | 1 |
| 11615 | chr18 | - | 67387250,67387490                   | 67387373,67388658                   | 3 |
| 11620 | chr18 | - | 67582598,67573731                   | 67582752,67573847                   | 1 |
| 11627 | chr18 | + | 67951517,67952803                   | 67952247,67955141                   | 2 |
|       | chr18 | + | 67952803,67951517                   | 67955141,67952247                   | 1 |
| 11630 | chr18 | + | 68014938,68044392                   | 68015029,68044824                   | 1 |
| 11631 | chr18 | + | 68410224,68413662,68223870,68395308 | 68410278,68415203,68224340,68395463 | 4 |
| 11637 | chr18 | + | 69504145,69505374                   | 69504679,69505593                   | 2 |
|       | chr18 | + | 69723687,69810875                   | 69723817,69810943                   | 2 |
|       | chr18 | + | 69724288,69812047                   | 69724338,69812126                   | 1 |
|       | chr18 | + | 69802536,69814614                   | 69802669,69814691                   | 2 |
|       | chr18 | + | 69817400,69841222                   | 69817604,69841452                   | 1 |
|       | chr18 | + | 69837620,69842336                   | 69837783,69842477                   | 2 |
| 11651 | chr18 | - | 73955967,73929693                   | 73956043,73930462                   | 1 |
|       | chr18 | - | 73955967,73956103                   | 73956043,73957632                   | 1 |
| 11656 | chr18 | + | 74377042,74380010                   | 74377143,74380060                   | 1 |
| 11657 | chr18 | + | 74432862,74436954                   | 74432977,74437083                   | 1 |
|       | chr18 | + | 74434298,74434996                   | 74434532,74435071                   | 1 |
| 11659 | chr18 | + | 74842202,74929950                   | 74842289,74931131                   | 1 |
| 11661 | chr18 | + | 74952940,74963654                   | 74953057,74963809                   | 1 |
| 11665 | chr18 | + | 75283111,75402938                   | 75283237,75403052                   | 1 |
|       | chr18 | + | 75389643,75239856,75358816          | 75389826,75239982,75358919          | 1 |
|       | chr18 | + | 75446273,75286478,75402938          | 75446620,75286573,75403052          | 1 |
| 11676 | chr18 | + | 77199552,77203789,77203789,77205882 | 77200792,77204006,77204006,77205946 | 1 |
| 11686 | chr18 | - | 77999645,77998175                   | 77999769,77998247                   | 1 |
| 11687 | chr18 | + | 78017200,78019723                   | 78017374,78019831                   | 4 |
|       | chr18 | + | 78017817,78020537                   | 78017966,78020688                   | 1 |
|       | chr18 | + | 78018565,78019950                   | 78018717,78020095                   | 3 |
|       | chr18 | + | 78019950,78021039                   | 78020095,78021607                   | 5 |
| 11699 | chr18 | + | 80415442,80403584                   | 80415546,80403800                   | 1 |
| 11700 | chr18 | + | 80403892,80406800                   | 80404082,80406869                   | 2 |
| 11708 | chr18 | - | 81109535,81033093                   | 81109686,81033170                   | 1 |
| 11733 | chr18 | + | 86567643,86664141                   | 86567781,86664255                   | 1 |
| 11744 | chr19 | + | 3288983,3290976,3290976,3292435     | 3289087,3291197,3291197,3292837     | 6 |
|       | chr19 | + | 3290976,3290976,3292435             | 3291197,3291197,3292837             | 1 |
|       | chr19 | + | 3290976,3292435,3290976             | 3291197,3292837,3291197             | 4 |
| 1174  | chr1  | - | 173998892,173998316,173997461       | 173998995,173998404,173997674       | 1 |
|       | chr1  | - | 174004403,173997461                 | 174004549,173997674                 | 1 |
| 11753 | chr19 | + | 3889879,3892709                     | 3889988,3892791                     | 1 |
| 11754 | chr19 | - | 3898979,3896603                     | 3899119,3896721                     | 1 |
| 11755 | chr19 | - | 3911688,3909152                     | 3911746,3909281                     | 1 |
| 11757 | chr19 | + | 3942439,3941884                     | 3942818,3942017                     | 2 |
| 1175  | chr1  | + | 174042254,174050007                 | 174042401,174050169                 | 1 |
|       | chr1  | + | 174044875,174050007                 | 174044964,174050169                 | 1 |
| 11764 | chr19 | - | 4009343,4007769                     | 4009533,4007915                     | 1 |
|       | chr19 | - | 4009343,4008342                     | 4009533,4008509                     | 1 |
|       | chr19 | - | 4011101,4009343                     | 4011272,4009533                     | 1 |
|       | chr19 | - | 4012550,4007769                     | 4012725,4007915                     | 1 |
| 11769 | chr19 | + | 4097350,4098004                     | 4097507,4098137                     | 1 |
| 11770 | chr19 | + | 4111865,4112326                     | 4112014,4112510                     | 1 |
|       | chr19 | + | 4112100,4112747,4113484             | 4112250,4112876,4113961             | 1 |
| 11771 | chr19 | - | 4115319,4114445                     | 4115496,4114796                     | 2 |
|       | chr19 | - | 4115981,4115080                     | 4116170,4115222                     | 1 |
| 11772 | chr19 | + | 4127056,4131228,4131361             | 4127121,4131282,4132307             | 1 |
| 11777 | chr19 | - | 4162259,4159402                     | 4162328,4159460                     | 1 |

|       |       |   |                                 |                                 |    |
|-------|-------|---|---------------------------------|---------------------------------|----|
|       | chr19 | - | 4163167,4162602,4162259,4161067 | 4163245,4162723,4162328,4161215 | 2  |
| 11780 | chr19 | + | 4192744,4194771                 | 4192876,4194906                 | 1  |
| 11787 | chr19 | - | 4348195,4324336                 | 4348761,4325046                 | 1  |
| 1178  | chr1  | - | 174130538,174126859             | 174130712,174128821             | 2  |
| 11796 | chr19 | + | 4712407,4724629                 | 4712461,4724803                 | 1  |
|       | chr19 | + | 4724079,4748058                 | 4724231,4748197                 | 1  |
|       | chr19 | + | 4726581,4746565                 | 4726697,4746940                 | 1  |
|       | chr19 | + | 4733653,4749633                 | 4733807,4749709                 | 1  |
|       | chr19 | + | 4734038,4751148                 | 4734909,4751191                 | 1  |
|       | chr19 | + | 4739590,4748593                 | 4739681,4748678                 | 1  |
|       | chr19 | + | 4745108,4751500                 | 4745369,4752352                 | 3  |
|       | chr19 | + | 4750480,4745779,4750020         | 4750654,4745984,4750241         | 2  |
| 11803 | chr19 | + | 4856511,4860390                 | 4856587,4860912                 | 1  |
| 11807 | chr19 | - | 4918244,4916278                 | 4918375,4916371                 | 1  |
| 11810 | chr19 | + | 4962878,4963505                 | 4962974,4963665                 | 1  |
|       | chr19 | + | 4964673,4963325,4964673         | 4964943,4963419,4964943         | 1  |
| 11812 | chr19 | + | 5026027,5027024                 | 5026188,5027159                 | 1  |
| 11814 | chr19 | + | 5045892,5047391                 | 5046038,5047484                 | 1  |
|       | chr19 | + | 5046814,5048508,5049406         | 5046911,5048573,5049917         | 1  |
| 11818 | chr19 | + | 5089418,5089771,5091367         | 5089630,5089876,5091425         | 1  |
|       | chr19 | + | 5092301,5091540,5092301         | 5092856,5091696,5092856         | 1  |
| 11819 | chr19 | - | 5093919,5092870                 | 5094032,5093497                 | 6  |
|       | chr19 | - | 5094283,5093671                 | 5094331,5093815                 | 1  |
|       | chr19 | - | 5094283,5093671,5098182         | 5094331,5093815,5098418         | 2  |
| 1181  | chr1  | - | 174216328,174206048             | 174216527,174206140             | 1  |
| 11820 | chr19 | - | 5104640,5099206                 | 5104736,5100572                 | 2  |
| 11821 | chr19 | - | 5113780,5107745                 | 5113850,5108688                 | 1  |
|       | chr19 | - | 5118121,5111364                 | 5118408,5111538                 | 1  |
| 11823 | chr19 | - | 5286188,5273931                 | 5286416,5274527                 | 1  |
|       | chr19 | - | 5294298,5283642                 | 5294376,5283750                 | 1  |
| 11827 | chr19 | - | 5365817,5364639,5366567,5366262 | 5365956,5365158,5366645,5366347 | 1  |
|       | chr19 | - | 5366567,5364639,5364639         | 5366645,5365158,5365158         | 9  |
| 11829 | chr19 | - | 5384163,5381209                 | 5384263,5381300                 | 1  |
| 1182  | chr1  | - | 174258128,174255435             | 174258229,174256714             | 1  |
| 11837 | chr19 | + | 5460960,5463786                 | 5461159,5463850                 | 1  |
|       | chr19 | + | 5461389,5464333                 | 5461516,5464431                 | 4  |
|       | chr19 | + | 5464924,5463603                 | 5464994,5464802                 | 10 |
| 11847 | chr19 | - | 5605542,5603417                 | 5605683,5603552                 | 1  |
|       | chr19 | - | 5608801,5609462                 | 5608957,5609685                 | 2  |
| 11849 | chr19 | - | 5653563,5652044                 | 5654273,5652146                 | 1  |
| 11856 | chr19 | + | 5756246,5757940                 | 5756330,5758532                 | 1  |
| 11857 | chr19 | - | 5758426,5766157,5758799         | 5758696,5766316,5758860         | 1  |
| 11870 | chr19 | + | 6049770,6051154                 | 6049897,6051310                 | 1  |
|       | chr19 | + | 6050770,6050521                 | 6051310,6050685                 | 1  |
| 11874 | chr19 | - | 6063821,6062820                 | 6063990,6063073                 | 1  |
|       | chr19 | - | 6066498,6066310                 | 6066563,6066414                 | 1  |
|       | chr19 | - | 6067668,6062820                 | 6067850,6063073                 | 2  |
| 11875 | chr19 | - | 6069857,6070080                 | 6070073,6071156                 | 2  |
|       | chr19 | - | 6070080,6069857                 | 6071156,6070073                 | 3  |
| 11883 | chr19 | - | 6137477,6134388                 | 6137640,6134801                 | 1  |
| 11887 | chr19 | - | 6231115,6228941                 | 6231175,6229043                 | 2  |
|       | chr19 | - | 6232766,6229221                 | 6232868,6229349                 | 1  |
|       | chr19 | - | 6233776,6227766                 | 6233973,6228531                 | 1  |
| 11888 | chr19 | + | 6252426,6261371                 | 6252577,6261524                 | 1  |
| 11894 | chr19 | + | 6343103,6352583                 | 6343176,6352652                 | 2  |
| 11895 | chr19 | + | 6368363,6371617                 | 6368439,6371707                 | 1  |
| 11897 | chr19 | + | 6401720,6408404                 | 6401863,6408570                 | 2  |
|       | chr19 | + | 6403023,6413427                 | 6403086,6413464                 | 1  |
|       | chr19 | + | 6403431,6402471                 | 6403638,6402574                 | 1  |
|       | chr19 | + | 6408447,6413864                 | 6408570,6414041                 | 1  |
| 11898 | chr19 | + | 6427804,6443630,6450527         | 6428778,6443648,6450599         | 2  |
|       | chr19 | + | 6504874,6531267                 | 6505056,6533215                 | 1  |
| 11900 | chr19 | - | 6905763,6904804                 | 6905937,6904968                 | 1  |
| 11901 | chr19 | - | 6931588,6930141                 | 6931647,6930223                 | 1  |
| 11902 | chr19 | - | 6981731,6981308                 | 6981770,6981441                 | 4  |
|       | chr19 | - | 6982031,6981555                 | 6982163,6981617                 | 4  |

|       |       |   |                                     |                                     |   |
|-------|-------|---|-------------------------------------|-------------------------------------|---|
| 11907 | chr19 | - | 7014018,7014018,7013501             | 7014244,7014244,7013630             | 1 |
| 11912 | chr19 | - | 7061841,7060510,7059850             | 7062093,7060584,7060086             | 5 |
| 11915 | chr19 | + | 7072422,7073381                     | 7072592,7073775                     | 1 |
| 11918 | chr19 | + | 7271278,7272021,7272402             | 7271400,7272103,7272547             | 2 |
| 11923 | chr19 | + | 7345043,7348832                     | 7345096,7349715                     | 1 |
| 11924 | chr19 | - | 7349885,7356287,7349885             | 7351940,7356449,7351940             | 1 |
|       | chr19 | - | 7355487,7349885,7355487             | 7355745,7351940,7355745             | 2 |
|       | chr19 | - | 7361323,7352531                     | 7361394,7352576                     | 2 |
| 11926 | chr19 | - | 7448785,7432179                     | 7448935,7432977                     | 1 |
| 11943 | chr19 | - | 8786323,8781939                     | 8786418,8782584                     | 1 |
| 11945 | chr19 | + | 8810476,8813936                     | 8810583,8813992                     | 1 |
| 11947 | chr19 | + | 8815932,8829398                     | 8816065,8830132                     | 2 |
|       | chr19 | + | 8817343,8824395                     | 8817414,8824517                     | 2 |
| 11953 | chr19 | - | 8858324,8848981                     | 8858484,8849780                     | 1 |
| 11961 | chr19 | + | 8945985,8948003                     | 8946402,8950153                     | 1 |
|       | chr19 | + | 8946497,8948628                     | 8946604,8948745                     | 3 |
| 11967 | chr19 | + | 9000027,9000571                     | 9000534,9000862                     | 9 |
| 11970 | chr19 | + | 9020756,9024789                     | 9020874,9024879                     | 1 |
| 11973 | chr19 | + | 9076188,9111648,9076188             | 9093685,9111748,9093685             | 4 |
| 11979 | chr19 | - | 9969328,9947166                     | 9969442,9947363                     | 1 |
| 11985 | chr19 | - | 10163397,10145053                   | 10163595,10145114                   | 1 |
| 11995 | chr19 | + | 10600441,10620181                   | 10600550,10622143                   | 1 |
| 11998 | chr19 | + | 10656787,10663618                   | 10656986,10664317                   | 1 |
| 12000 | chr19 | + | 10682282,10689977                   | 10682399,10690080                   | 1 |
|       | chr19 | + | 10685191,10696310                   | 10685306,10696474                   | 1 |
|       | chr19 | + | 10687362,10701615                   | 10687521,10701725                   | 2 |
|       | chr19 | + | 10699213,10700385                   | 10699337,10700480                   | 1 |
| 12010 | chr19 | - | 10941419,10932318                   | 10941634,10933641                   | 1 |
| 12043 | chr19 | - | 11857515,11851577                   | 11857626,11851660                   | 1 |
| 1204  | chr1  | - | 175274450,175274705                 | 175274676,175275188                 | 1 |
|       | chr1  | - | 175275875,175268150                 | 175276028,175268276                 | 1 |
| 12077 | chr19 | - | 12850901,12845492,12852431          | 12850952,12845592,12852536          | 2 |
|       | chr19 | - | 12864749,12853113                   | 12864778,12853150                   | 1 |
| 120   | chr1  | + | 34191934,34213443                   | 34192101,34213539                   | 1 |
|       | chr1  | + | 34229027,34304493                   | 34229190,34304660                   | 1 |
|       | chr1  | + | 34230959,34360265                   | 34231067,34360376                   | 1 |
|       | chr1  | + | 34259289,34276240                   | 34259466,34276370                   | 1 |
|       | chr1  | + | 34344735,34348631                   | 34344864,34348761                   | 1 |
| 12124 | chr19 | - | 14668873,14590848                   | 14668918,14590865                   | 1 |
|       | chr19 | - | 14671246,14638878,14592261          | 14671344,14638941,14592466          | 3 |
| 12128 | chr19 | + | 16294077,16452646                   | 16294262,16452800                   | 6 |
| 12152 | chr19 | - | 21245167,21195641                   | 21245331,21196777                   | 1 |
| 12177 | chr19 | - | 25022558,25015238                   | 25022596,25015325                   | 1 |
|       | chr19 | - | 25035806,25015238                   | 25036074,25015325                   | 1 |
| 12185 | chr19 | + | 26756360,26850590                   | 26756603,26850733                   | 2 |
|       | chr19 | + | 26826313,26834367,26845427          | 26826531,26834421,26845533          | 5 |
|       | chr19 | + | 26848662,26834367,26845427          | 26848795,26834421,26845533          | 2 |
| 12208 | chr19 | - | 29423166,29432806,29424849          | 29423495,29432893,29424959          | 1 |
|       | chr19 | - | 29436286,29432806,29424849          | 29436361,29432893,29424959          | 1 |
|       | chr19 | - | 29436286,29435306,29432806,29424849 | 29436361,29435417,29432893,29424959 | 1 |
| 12239 | chr19 | - | 33662690,33632754                   | 33662833,33632826                   | 1 |
| 12259 | chr19 | + | 35011266,35049982                   | 35011338,35050221                   | 1 |
| 12261 | chr19 | - | 36131195,36043793                   | 36131850,36044554                   | 1 |
| 12290 | chr19 | + | 38231874,38243866                   | 38232024,38243954                   | 1 |
| 12295 | chr19 | + | 38694932,38799190                   | 38695221,38799313                   | 1 |
| 12296 | chr19 | - | 38884497,38873799                   | 38884591,38873880                   | 1 |
| 12298 | chr19 | + | 39012895,39021214                   | 39012952,39021358                   | 1 |
| 122   | chr1  | + | 34496885,34500222                   | 34496994,34500332                   | 1 |
| 12326 | chr19 | + | 41103764,41130249                   | 41104131,41130333                   | 2 |
| 12336 | chr19 | - | 41709089,41700011                   | 41709233,41700083                   | 1 |
| 12341 | chr19 | - | 41948232,41940010                   | 41948340,41940078                   | 1 |
|       | chr19 | - | 41949206,41941195                   | 41949365,41941262                   | 2 |
|       | chr19 | - | 41961289,41949206                   | 41961417,41949365                   | 1 |
| 12344 | chr19 | + | 42008004,42018071                   | 42008155,42018587                   | 1 |
| 12357 | chr19 | - | 42372143,42358612                   | 42372312,42358756                   | 1 |
|       | chr19 | - | 42372143,42362342,42358612          | 42372312,42362488,42358756          | 1 |



|       |             |   |                                     |                                     |   |
|-------|-------------|---|-------------------------------------|-------------------------------------|---|
| 1235  | chr1        | - | 177421183,177006147                 | 177421307,177006228                 | 1 |
| 1237  | chr1        | - | 177544867,177536185                 | 177545044,177536313                 | 2 |
| 12385 | chr19       | - | 44165422,44158906                   | 44165617,44158968                   | 1 |
| 12396 | chr19       | - | 44629420,44624743                   | 44629547,44624902                   | 1 |
| 12406 | chr19       | + | 45124233,45124717,45122163,45124233 | 45124404,45124816,45122380,45124404 | 3 |
| 12410 | chr19       | + | 45587876,45591504                   | 45588014,45591623                   | 1 |
|       | chr19       | + | 45588497,45593298                   | 45588616,45593409                   | 1 |
| 12421 | chr19       | - | 46006840,45960441                   | 46006901,45960517                   | 1 |
| 12423 | chr19       | - | 46107090,46108451                   | 46107831,46108670                   | 3 |
|       | chr19       | - | 46110224,46108521,46110752,46110596 | 46110327,46108670,46110855,46110641 | 1 |
| 12428 | chr19       | + | 46330142,46355027                   | 46330487,46355233                   | 1 |
|       | chr19       | + | 46354401,46360149                   | 46354562,46361000                   | 1 |
| 12430 | chr19       | + | 46384697,46385498                   | 46384867,46385568                   | 1 |
| 12431 | chr19       | - | 46389102,46388665,46388143          | 46389293,46388823,46388288          | 2 |
|       | chr19       | - | 46389102,46388665                   | 46389293,46388823                   | 2 |
|       | chr19       | - | 46389102,46388665,46390522,46389102 | 46389293,46388823,46390566,46389293 | 4 |
|       | chr19       | - | 46393963,46388665                   | 46394053,46388823                   | 1 |
|       | chr19       | - | 46395016,46392143                   | 46395097,46392379                   | 1 |
| 12432 | chr19       | + | 46402673,46403577                   | 46403016,46404083                   | 1 |
| 12433 | chr19       | - | 46412864,46405033                   | 46412910,46405324                   | 6 |
| 12438 | chr19       | + | 46587597,46589548                   | 46587831,46590945                   | 1 |
| 12439 | chr19       | - | 46617971,46605598                   | 46618022,46605876                   | 1 |
| 12443 | chr19       | + | 46774045,46776004                   | 46774108,46777872                   | 1 |
| 12447 | chr19       | + | 47089187,47097824                   | 47090309,47098836                   | 1 |
| 1244  | chr1        | - | 177905589,177892436                 | 177905758,177894215                 | 1 |
| 12454 | chr19       | + | 47253309,47331201                   | 47254041,47331348                   | 1 |
| 12459 | chr19       | + | 47654508,47710832                   | 47654833,47710957                   | 1 |
| 12461 | chr19       | - | 47740346,47737510                   | 47740451,47737546                   | 1 |
|       | chr19       | - | 47742984,47720851                   | 47743200,47721768                   | 1 |
| 12469 | chr19       | + | 48862879,48877138                   | 48863003,48877299                   | 1 |
| 12474 | chr19       | - | 53078253,53065672                   | 53078304,53066209                   | 3 |
| 12482 | chr19       | + | 53693260,53703156                   | 53693339,53703317                   | 1 |
|       | chr19       | + | 53695078,53703733                   | 53695196,53703875                   | 1 |
|       | chr19       | + | 53702340,53710160                   | 53702444,53710312                   | 1 |
| 12485 | chr19       | - | 54017955,54006619,54018906,54018645 | 54018069,54006695,54019117,54018718 | 2 |
|       | chr19       | - | 54018645,54018906                   | 54018718,54019117                   | 1 |
| 12492 | chr19       | - | 55376503,55372788                   | 55377094,55373378                   | 1 |
| 12542 | chr19       | - | 60847995,60837018                   | 60848100,60838207                   | 1 |
| 12544 | chr19       | - | 60933112,60914663                   | 60933167,60914953                   | 1 |
| 12547 | chr19       | - | 61194129,61192541                   | 61195084,61193191                   | 1 |
| 12552 | chr1_random | + | 279771,295836                       | 279825,296019                       | 1 |
| 12553 | chr1_random | - | 304439,301551                       | 304540,301693                       | 1 |
|       | chr1_random | - | 304439,303270,301551                | 304540,303339,301693                | 1 |
|       | chr1_random | - | 304823,299583                       | 304859,301001                       | 1 |
|       | chr1_random | - | 308383,304651                       | 308506,304719                       | 1 |
|       | chr1_random | - | 309272,304823                       | 309377,304859                       | 1 |
| 1255  | chr1        | - | 179700055,179693308                 | 179700153,179694428                 | 3 |
|       | chr1        | - | 179712973,179702202                 | 179713024,179702357                 | 1 |
|       | chr1        | - | 179714179,179701271                 | 179714248,179701396                 | 1 |
| 12563 | chr2        | + | 3201559,3242102                     | 3201678,3242270                     | 3 |
|       | chr2        | + | 3222083,3226738                     | 3222219,3226883                     | 1 |
| 12571 | chr2        | - | 3428445,3406125                     | 3428526,3406341                     | 1 |
|       | chr2        | - | 3428445,3420008                     | 3428526,3420057                     | 1 |
| 12586 | chr2        | - | 4941687,4942278                     | 4942274,4942527                     | 3 |
| 12589 | chr2        | - | 5728476,5724992,5716594             | 5728552,5725021,5716732             | 1 |
|       | chr2        | - | 5728476,5724992,5742321             | 5728552,5725021,5742428             | 1 |
|       | chr2        | - | 5762998,5719406                     | 5763070,5719535                     | 1 |
| 12601 | chr2        | - | 6642462,6470877                     | 6642659,6471021                     | 1 |
|       | chr2        | - | 6642462,6528927                     | 6642659,6529007                     | 1 |
|       | chr2        | - | 7317758,6474830,6470877             | 7317825,6475028,6471021             | 1 |
| 12610 | chr2        | - | 9980622,9977660                     | 9980719,9977788                     | 4 |
|       | chr2        | - | 9980622,9977660,9981127             | 9980719,9977788,9981283             | 1 |
|       | chr2        | - | 9990236,9984912                     | 9990368,9984977                     | 1 |
| 12622 | chr2        | - | 11669476,11668686                   | 11670761,11668793                   | 4 |
|       | chr2        | - | 11682107,11665252                   | 11682200,11665384                   | 1 |
|       | chr2        | - | 11688748,11678043                   | 11689338,11678130                   | 1 |

|       |      |   |                            |                            |    |
|-------|------|---|----------------------------|----------------------------|----|
| 12627 | chr2 | - | 12317805,12286073,12340785 | 12317885,12286146,12341087 | 2  |
|       | chr2 | - | 12327486,12286073          | 12327547,12286146          | 1  |
|       | chr2 | - | 12340785,12308235,12286073 | 12341087,12308306,12286146 | 1  |
| 1262  | chr1 | - | 180260295,180259445        | 180260477,180259538        | 2  |
|       | chr1 | - | 180263127,180259998        | 180263240,180260070        | 1  |
|       | chr1 | - | 180264017,180261479        | 180264157,180261608        | 1  |
|       | chr1 | - | 180266177,180261223        | 180266289,180261392        | 1  |
| 12633 | chr2 | + | 13500039,13504099          | 13500135,13504434          | 4  |
| 12649 | chr2 | - | 17298154,17296645          | 17301469,17296947          | 2  |
| 12655 | chr2 | + | 18023084,18043871          | 18023139,18043975          | 1  |
| 12657 | chr2 | + | 18595751,18596576          | 18595815,18596636          | 1  |
|       | chr2 | + | 18596282,18596576          | 18596343,18596636          | 1  |
|       | chr2 | + | 18596282,18597493          | 18596343,18597843          | 1  |
|       | chr2 | + | 18596435,18597493          | 18596492,18597843          | 1  |
| 12673 | chr2 | + | 21289193,21704690          | 21290784,21704929          | 1  |
| 12675 | chr2 | + | 22490449,22523766          | 22490565,22523883          | 1  |
| 12678 | chr2 | - | 22802095,22818733,22808954 | 22802281,22818748,22809128 | 1  |
| 12681 | chr2 | + | 23018020,23047926          | 23018183,23048082          | 1  |
|       | chr2 | + | 23028475,23050254          | 23028626,23050328          | 1  |
| 12696 | chr2 | - | 24478118,24472338          | 24478227,24472466          | 2  |
| 12700 | chr2 | + | 24817964,24821076,24822021 | 24818145,24821174,24822194 | 4  |
| 1270  | chr1 | + | 181609715,181614335        | 181609846,181614447        | 2  |
| 12720 | chr2 | + | 25135646,25140081          | 25135722,25140211          | 1  |
| 12723 | chr2 | - | 25147766,25146702          | 25148004,25147648          | 53 |
|       | chr2 | - | 25147766,25151311,25147766 | 25148004,25151457,25148004 | 3  |
|       | chr2 | - | 25149957,25146702          | 25150068,25147648          | 16 |
|       | chr2 | - | 25151311,25147766          | 25151457,25148004          | 1  |
|       | chr2 | - | 25151311,25147766,25151544 | 25151457,25148004,25151654 | 11 |
|       | chr2 | - | 25152889,25151311          | 25153002,25151457          | 1  |
|       | chr2 | - | 25160804,25166320          | 25160926,25169124          | 3  |
| 12727 | chr2 | - | 25209987,25209752,25208879 | 25210154,25209813,25209036 | 2  |
| 12731 | chr2 | + | 25262545,25263115          | 25263062,25263256          | 8  |
|       | chr2 | + | 25262545,25263779          | 25263062,25263867          | 1  |
|       | chr2 | + | 25263115,25262545          | 25263256,25263062          | 4  |
|       | chr2 | + | 25263360,25264126          | 25263534,25264206          | 1  |
|       | chr2 | + | 25263779,25264618          | 25263867,25265014          | 2  |
| 12733 | chr2 | + | 25298354,25299245          | 25298674,25299357          | 1  |
|       | chr2 | + | 25299048,25301730          | 25299154,25301865          | 1  |
|       | chr2 | + | 25301489,25302310          | 25301631,25302413          | 1  |
| 12736 | chr2 | - | 25324507,25323337          | 25324647,25323439          | 3  |
| 12739 | chr2 | + | 25356297,25359699          | 25356406,25359847          | 1  |
|       | chr2 | + | 25358390,25360229,25360229 | 25358565,25360990,25360990 | 2  |
|       | chr2 | + | 25358956,25359936          | 25359386,25360149          | 1  |
| 1273  | chr1 | + | 182031155,182066782        | 182031403,182066815        | 1  |
| 12741 | chr2 | + | 25416059,25417370          | 25416220,25417602          | 1  |
|       | chr2 | + | 25416059,25417370,25417370 | 25416220,25417602,25417602 | 1  |
| 12743 | chr2 | - | 25430202,25428950,25428950 | 25430391,25429219,25429219 | 1  |
| 12745 | chr2 | - | 25456870,25439622          | 25456918,25439681          | 1  |
| 12746 | chr2 | - | 25470928,25464950          | 25472129,25465061          | 1  |
| 12761 | chr2 | + | 25679079,25680419          | 25679216,25680464          | 1  |
| 12763 | chr2 | + | 25764724,25765785          | 25764826,25765806          | 1  |
| 12765 | chr2 | - | 25861699,25854066          | 25862133,25854587          | 1  |
| 12772 | chr2 | + | 26175292,26180317          | 26175546,26180433          | 1  |
|       | chr2 | + | 26179932,26182811          | 26180056,26182935          | 1  |
| 12775 | chr2 | - | 26220139,26218295,26220139 | 26221557,26218540,26221557 | 1  |
|       | chr2 | - | 26224658,26218295          | 26225132,26218540          | 1  |
| 12777 | chr2 | + | 26247385,26248605          | 26247486,26248724          | 1  |
| 12779 | chr2 | - | 26279936,26264950          | 26280077,26266473          | 1  |
|       | chr2 | - | 26280995,26277527          | 26281107,26277773          | 1  |
| 12782 | chr2 | + | 26447937,26446418,26447637 | 26448202,26446583,26447800 | 1  |
| 12784 | chr2 | + | 26483991,26490506          | 26484219,26490683          | 1  |
| 12792 | chr2 | - | 26771776,26771115,26770951 | 26771851,26771289,26771034 | 1  |
| 12796 | chr2 | - | 26813998,26811014          | 26814087,26811089          | 1  |
|       | chr2 | - | 26817902,26816122,26813998 | 26818243,26816260,26814087 | 1  |
| 12803 | chr2 | + | 27388512,27389287          | 27388546,27389375          | 1  |
| 12806 | chr2 | - | 27134116,27125647          | 27134138,27125735          | 1  |

|       |      |   |                                     |                                     |    |
|-------|------|---|-------------------------------------|-------------------------------------|----|
| 12811 | chr2 | + | 27777536,27814004                   | 27777704,27814067                   | 1  |
|       | chr2 | + | 27851380,27858002                   | 27851434,27858110                   | 1  |
|       | chr2 | + | 27869626,27873960                   | 27869680,27874068                   | 1  |
| 12814 | chr2 | + | 28048612,28068051                   | 28048982,28068207                   | 1  |
|       | chr2 | + | 28069620,28048612,28068051          | 28069951,28048982,28068207          | 1  |
|       | chr2 | + | 28069620,28070128,28069620          | 28069951,28070348,28069951          | 22 |
| 1281  | chr1 | + | 182515973,182524173                 | 182516121,182524296                 | 1  |
| 12833 | chr2 | + | 29205365,29379886                   | 29205510,29380308                   | 2  |
|       | chr2 | + | 29332852,29355738,29378293,29379886 | 29333953,29355846,29378371,29380308 | 1  |
| 12837 | chr2 | + | 29650900,29651927                   | 29651030,29653263                   | 1  |
| 12838 | chr2 | + | 29658199,29667088                   | 29658480,29667215                   | 1  |
| 12839 | chr2 | + | 29698622,29682908,29696921          | 29700516,29682955,29697003          | 1  |
| 12843 | chr2 | + | 29833896,29869677                   | 29834136,29869692                   | 1  |
|       | chr2 | + | 29835596,29885971                   | 29835722,29886118                   | 2  |
|       | chr2 | + | 29841684,29886490                   | 29841818,29886970                   | 1  |
|       | chr2 | + | 29847378,29859193                   | 29847516,29859217                   | 1  |
|       | chr2 | + | 29849132,29886490                   | 29849210,29886970                   | 2  |
|       | chr2 | + | 29849319,29885519                   | 29849475,29885716                   | 1  |
|       | chr2 | + | 29853675,29885139                   | 29853768,29885194                   | 1  |
|       | chr2 | + | 29859193,29875446                   | 29859217,29875567                   | 1  |
|       | chr2 | + | 29866218,29886490                   | 29866318,29886970                   | 3  |
|       | chr2 | + | 29866705,29885971                   | 29866852,29886118                   | 2  |
|       | chr2 | + | 29868965,29881041                   | 29869069,29881118                   | 2  |
|       | chr2 | + | 29868965,29885139                   | 29869069,29885194                   | 1  |
|       | chr2 | + | 29875446,29877959                   | 29875567,29878058                   | 1  |
|       | chr2 | + | 29881530,29882538                   | 29881740,29882651                   | 1  |
| 12850 | chr2 | + | 29990928,29992801                   | 29991072,29992901                   | 1  |
| 12853 | chr2 | - | 30041876,30043208,30042352          | 30042063,30043337,30042429          | 1  |
|       | chr2 | - | 30043734,30043572,30043208,30042352 | 30043884,30043659,30043337,30042429 | 2  |
| 12858 | chr2 | + | 30164738,30180992                   | 30164853,30181059                   | 1  |
|       | chr2 | + | 30178190,30197892                   | 30178267,30197967                   | 1  |
|       | chr2 | + | 30179039,30198794                   | 30179154,30198868                   | 1  |
| 12859 | chr2 | - | 30214662,30200328                   | 30214751,30200947                   | 1  |
| 12875 | chr2 | + | 30858075,30875304                   | 30858138,30875407                   | 1  |
|       | chr2 | + | 30859923,30873452                   | 30860020,30873534                   | 1  |
| 12892 | chr2 | + | 32056345,32077809                   | 32056538,32077907                   | 1  |
| 12898 | chr2 | - | 32190201,32168203                   | 32190340,32168445                   | 1  |
|       | chr2 | - | 32193253,32183480                   | 32193414,32183567                   | 1  |
| 12904 | chr2 | - | 32276822,32271928                   | 32276910,32272079                   | 1  |
| 12913 | chr2 | - | 32548112,32538128                   | 32548241,32538988                   | 1  |
| 12915 | chr2 | + | 32607033,32608508                   | 32607205,32608715                   | 1  |
| 12918 | chr2 | + | 32631340,32645107                   | 32631415,32645691                   | 1  |
| 12920 | chr2 | - | 32653624,32643481                   | 32653710,32645157                   | 1  |
| 12941 | chr2 | - | 34567684,34548892,34546625,34545981 | 34567858,34549022,34546735,34546141 | 1  |
| 12947 | chr2 | - | 34711967,34707608                   | 34712077,34708353                   | 1  |
|       | chr2 | - | 34726269,34709771                   | 34726482,34709912                   | 1  |
| 12951 | chr2 | - | 34884921,34882033                   | 34884993,34882124                   | 1  |
| 1295  | chr1 | - | 183113857,183111434                 | 183113936,183111620                 | 4  |
| 1296  | chr1 | + | 183282758,183380100,183384725       | 183283637,183380213,183384869       | 1  |
|       | chr1 | + | 183380100,183389355,183389355       | 183380213,183390040,183390040       | 1  |
| 13006 | chr2 | - | 37482954,37442029                   | 37483046,37442074                   | 1  |
|       | chr2 | - | 37502635,37459441                   | 37502805,37459534                   | 2  |
| 13019 | chr2 | + | 38868634,38870577                   | 38868707,38871392                   | 1  |
| 13020 | chr2 | - | 38896746,38902542                   | 38896872,38903286                   | 6  |
| 13025 | chr2 | - | 40968487,40586216                   | 40968614,40586346                   | 1  |
| 13031 | chr2 | - | 44965535,44876416                   | 44965764,44878624                   | 2  |
|       | chr2 | - | 44965867,44965535                   | 44965984,44965764                   | 2  |
| 13040 | chr2 | + | 49535684,49578496                   | 49535758,49578669                   | 1  |
|       | chr2 | + | 49544172,49550287                   | 49544277,49550375                   | 1  |
|       | chr2 | + | 49578496,49585636                   | 49578669,49585843                   | 1  |
| 13053 | chr2 | - | 52135363,52044202                   | 52135468,52044307                   | 1  |
| 13060 | chr2 | - | 53018591,53016926                   | 53018712,53016951                   | 1  |
|       | chr2 | - | 53019809,53018591,53016926          | 53019920,53018712,53016951          | 6  |
| 13068 | chr2 | + | 57090707,57208170                   | 57090978,57208346                   | 2  |
|       | chr2 | + | 57142255,57210065                   | 57142427,57210224                   | 1  |
|       | chr2 | + | 57219769,57216915                   | 57223130,57217014                   | 1  |

|       |      |   |                                     |                                     |   |
|-------|------|---|-------------------------------------|-------------------------------------|---|
| 13079 | chr2 | + | 59038829,59185776                   | 59039216,59185861                   | 2 |
| 13083 | chr2 | - | 59716186,59711272                   | 59716607,59711366                   | 1 |
| 13084 | chr2 | - | 59815415,59756495                   | 59815609,59756558                   | 1 |
|       | chr2 | - | 59963519,59737419                   | 59963867,59738859                   | 1 |
| 13100 | chr2 | - | 62340856,62339001                   | 62340929,62339345                   | 1 |
| 13115 | chr2 | - | 66094570,66077579                   | 66094674,66077664                   | 1 |
| 13125 | chr2 | + | 68420469,68453146                   | 68420576,68453213                   | 1 |
| 13137 | chr2 | + | 69570874,69572347                   | 69570982,69572435                   | 1 |
|       | chr2 | + | 69571245,69587328                   | 69571290,69592116                   | 1 |
|       | chr2 | + | 69579542,69579542,69584084          | 69579750,69579750,69584172          | 5 |
|       | chr2 | + | 69579542,69581669,69587017          | 69579750,69581837,69587154          | 4 |
| 13141 | chr2 | + | 69699669,69709178                   | 69699769,69709389                   | 1 |
|       | chr2 | + | 69699684,69708734                   | 69699796,69708890                   | 3 |
|       | chr2 | + | 69706835,69707936                   | 69706907,69708077                   | 1 |
| 13147 | chr2 | + | 70350816,70360536,70369732          | 70350873,70360564,70369881          | 1 |
| 13149 | chr2 | + | 70522036,70528714                   | 70522160,70529800                   | 1 |
| 13150 | chr2 | - | 70555838,70550464,70559130          | 70555950,70552222,70559266          | 1 |
| 13154 | chr2 | + | 71050069,71098878                   | 71050131,71099004                   | 1 |
|       | chr2 | + | 71084745,71096140                   | 71084841,71096281                   | 1 |
|       | chr2 | + | 71084745,71100704                   | 71084841,71101351                   | 2 |
| 13156 | chr2 | - | 71146112,711112351                  | 71146197,71113410                   | 1 |
| 13159 | chr2 | + | 71361858,71362939                   | 71361906,71363248                   | 1 |
| 13169 | chr2 | + | 71721899,71738040                   | 71723683,71740731                   | 1 |
| 13170 | chr2 | + | 71869089,72036393                   | 71869232,72036470                   | 2 |
| 13179 | chr2 | - | 73041381,72935201                   | 73041525,72935324                   | 2 |
| 13189 | chr2 | - | 73462933,73517671                   | 73463726,73517960                   | 1 |
|       | chr2 | - | 73497736,73462933                   | 73498423,73463726                   | 1 |
|       | chr2 | - | 73517671,73469802                   | 73517960,73469887                   | 1 |
|       | chr2 | - | 73554420,73469802                   | 73554476,73469887                   | 1 |
| 1318  | chr1 | - | 186721481,186729281,186721481       | 186722757,186729533,186722757       | 2 |
| 13191 | chr2 | - | 73749308,73747240                   | 73749351,73747434                   | 6 |
| 1320  | chr1 | - | 187147064,187111918                 | 187147114,187112063                 | 2 |
|       | chr1 | - | 187152899,187111918                 | 187153280,187112063                 | 1 |
| 13219 | chr2 | - | 76477256,76467993                   | 76477374,76468625                   | 1 |
| 13223 | chr2 | - | 76629542,76626959                   | 76629830,76627156                   | 1 |
|       | chr2 | - | 76646047,76561632                   | 76646174,76561923                   | 1 |
|       | chr2 | - | 76665051,76569999                   | 76665135,76570299                   | 1 |
|       | chr2 | - | 76700168,76634326                   | 76700246,76634596                   | 1 |
|       | chr2 | - | 76714508,76559290                   | 76714796,76559572                   | 1 |
|       | chr2 | - | 76732716,76678289                   | 76732959,76678370                   | 1 |
|       | chr2 | - | 76739897,76565402                   | 76740179,76565690                   | 2 |
|       | chr2 | - | 76773980,76670712                   | 76774604,76670778                   | 1 |
|       | chr2 | - | 76777906,76617062                   | 76778167,76617211                   | 1 |
| 1322  | chr1 | + | 187194767,187219908                 | 187194924,187220045                 | 1 |
|       | chr1 | + | 187210124,187230839                 | 187210209,187231073                 | 2 |
|       | chr1 | + | 187211235,187225187                 | 187211256,187225547                 | 1 |
|       | chr1 | + | 187225187,187231369                 | 187225547,187233630                 | 5 |
|       | chr1 | + | 187225187,187235581                 | 187225547,187235654                 | 1 |
|       | chr1 | + | 187237327,187251730                 | 187237429,187251795                 | 1 |
| 13244 | chr2 | - | 80341451,80375630,80346329          | 80341568,80375712,80346439          | 1 |
|       | chr2 | - | 80365715,80363532                   | 80365835,80363664                   | 2 |
|       | chr2 | - | 80394358,80341451                   | 80394415,80341568                   | 1 |
| 13257 | chr2 | - | 84490562,84445340,84443805,84440937 | 84490897,84445403,84443909,84443060 | 1 |
| 13260 | chr2 | + | 84518581,84525759                   | 84518818,84525856                   | 1 |
|       | chr2 | + | 84525759,84527022                   | 84525856,84528371                   | 1 |
| 13261 | chr2 | - | 84555139,84536399                   | 84555192,84536557                   | 1 |
| 13275 | chr2 | + | 84882399,84885840                   | 84882472,84885929                   | 2 |
| 13276 | chr2 | + | 84902044,84912753                   | 84904173,84913202                   | 1 |
| 1340  | chr1 | - | 191167582,191167869                 | 191167711,191167952                 | 1 |
| 1343  | chr1 | - | 191710399,191704370                 | 191710510,191704745                 | 1 |
|       | chr1 | - | 191723696,191705987                 | 191723807,191706096                 | 1 |
| 1348  | chr1 | - | 192728961,192695470                 | 192728997,192695830                 | 1 |
| 13508 | chr2 | + | 90607564,90616061,90605986          | 90607698,90616378,90606091          | 1 |
| 13510 | chr2 | + | 90687669,90689527,90692996,90693207 | 90688471,90689612,90693023,90693270 | 2 |
|       | chr2 | + | 90693207,90705340                   | 90693270,90706791                   | 1 |
| 13514 | chr2 | - | 90757585,90754140                   | 90757753,90754332                   | 2 |

|       |      |   |                                         |                                         |   |
|-------|------|---|-----------------------------------------|-----------------------------------------|---|
|       | chr2 | - | 90757766,90757585                       | 90758207,90757753                       | 1 |
| 13517 | chr2 | + | 90883296,90884996                       | 90883419,90885196                       | 1 |
| 13519 | chr2 | + | 90894238,90899202                       | 90894488,90899284                       | 3 |
|       | chr2 | + | 90894731,90897068                       | 90894815,90897217                       | 3 |
|       | chr2 | + | 90894731,90898166                       | 90894815,90898312                       | 1 |
|       | chr2 | + | 90896061,90899410                       | 90896199,90899585                       | 1 |
| 13534 | chr2 | + | 91367134,91435467                       | 91367237,91435671                       | 1 |
| 13543 | chr2 | - | 91778318,91772982                       | 91778392,91773682                       | 1 |
|       | chr2 | - | 91778318,91774972                       | 91778392,91775016                       | 1 |
|       | chr2 | - | 91780914,91778665                       | 91781031,91778721                       | 1 |
|       | chr2 | - | 91782784,91778485                       | 91782841,91778548                       | 1 |
|       | chr2 | - | 91803442,91780761                       | 91803756,91780833                       | 1 |
| 13550 | chr2 | - | 92231192,92225569,92225303,92225080     | 92231298,92225679,92225420,92225151     | 1 |
|       | chr2 | - | 92241185,92227710                       | 92241420,92227792                       | 1 |
| 1371  | chr1 | - | 193924342,193925264                     | 193925036,193925748                     | 5 |
| 13750 | chr2 | - | 93270287,93261983                       | 93270412,93262085                       | 1 |
| 13756 | chr2 | - | 93850419,93843209                       | 93850852,93843313                       | 1 |
| 13765 | chr2 | - | 101461054,101416168                     | 101461203,101416308                     | 2 |
| 13769 | chr2 | - | 101611091,101574761                     | 101611172,101574902                     | 1 |
| 13788 | chr2 | - | 103573075,103565820                     | 103573192,103565919                     | 2 |
| 13792 | chr2 | + | 103896157,103900038,103893521,103894992 | 103897647,103903394,103893637,103895284 | 9 |
| 13800 | chr2 | + | 104449247,104486556,104449247           | 104451563,104486623,104451563           | 1 |
|       | chr2 | + | 104488326,104499422                     | 104488404,104499492                     | 1 |
| 13825 | chr2 | + | 106623789,106707104                     | 106624015,106707602                     | 1 |
| 1383  | chr1 | + | 195129681,195157489                     | 195129741,195157601                     | 1 |
| 13884 | chr2 | + | 112181987,112196351                     | 112182202,112197748                     | 2 |
| 13885 | chr2 | - | 112207975,112204308                     | 112208184,112204462                     | 1 |
| 13887 | chr2 | + | 112295181,112295181,112299621           | 112295457,112295457,112299736           | 2 |
| 13890 | chr2 | - | 112789246,112489429                     | 112789321,112489601                     | 1 |
|       | chr2 | - | 112804489,112676828                     | 112804568,112676915                     | 1 |
| 13925 | chr2 | + | 118234087,118238670                     | 118234240,118238819                     | 1 |
| 13929 | chr2 | + | 118450016,118460863                     | 118450066,118461013                     | 2 |
| 13930 | chr2 | + | 118518962,118520942                     | 118519460,118521077                     | 1 |
| 13932 | chr2 | - | 118539974,118536828                     | 118540514,118536991                     | 1 |
| 13956 | chr2 | - | 119272591,119208599                     | 119272795,119208702                     | 1 |
| 13963 | chr2 | + | 119500835,119526853                     | 119501016,119527001                     | 2 |
|       | chr2 | + | 119500835,119545901                     | 119501016,119546037                     | 1 |
|       | chr2 | + | 119537744,119552628                     | 119537856,119552736                     | 1 |
| 13969 | chr2 | + | 119798434,119848767                     | 119798904,119849051                     | 1 |
| 13990 | chr2 | + | 120803366,120802797                     | 120803546,120803214                     | 1 |
|       | chr2 | + | 120816066,120822141,120812571           | 120816222,120822255,120812694           | 1 |
| 13991 | chr2 | + | 120835562,120841866                     | 120835644,120841913                     | 1 |
|       | chr2 | + | 120838434,120841866,120838434           | 120838712,120841913,120838712           | 1 |
| 13995 | chr2 | + | 120971768,120975955                     | 120971856,120976082                     | 1 |
| 13998 | chr2 | - | 121096259,121024711                     | 121096444,121024857                     | 2 |
| 13999 | chr2 | + | 121133667,121121198                     | 121136568,121121278                     | 1 |
| 14000 | chr2 | - | 121167351,121160458                     | 121167473,121160572                     | 1 |
|       | chr2 | - | 121174429,121167640                     | 121174584,121167772                     | 1 |
| 14001 | chr2 | + | 121186841,121189233                     | 121186965,121189473                     | 2 |
| 14018 | chr2 | - | 122011866,121951005                     | 122011925,121951126                     | 1 |
| 14023 | chr2 | - | 122108796,122106649                     | 122108950,122106805                     | 1 |
| 14027 | chr2 | - | 122182818,122179500                     | 122183025,122179867                     | 1 |
| 14028 | chr2 | + | 122273505,122276661                     | 122273689,122276775                     | 1 |
| 14046 | chr2 | + | 125074901,125083092                     | 125074993,125084785                     | 2 |
| 14053 | chr2 | - | 125664884,125660489,125656039           | 125664937,125660572,125658073           | 4 |
| 14062 | chr2 | + | 126554895,126557796                     | 126555058,126559070                     | 7 |
| 14069 | chr2 | - | 126943241,126931839                     | 126943348,126931931                     | 2 |
| 14072 | chr2 | + | 127044088,127063794                     | 127044244,127063971                     | 1 |
|       | chr2 | + | 127052030,127065804                     | 127052219,127066187                     | 1 |
| 14081 | chr2 | - | 127282233,127346973,127285718           | 127284124,127347106,127285823           | 1 |
| 14087 | chr2 | - | 127595994,127579708                     | 127596128,127579808                     | 1 |
| 14089 | chr2 | - | 127655173,127640373                     | 127655312,127640484                     | 1 |
| 14097 | chr2 | - | 128757013,128752003                     | 128757136,128752547                     | 1 |
| 14119 | chr2 | + | 130040301,130067219                     | 130040392,130067399                     | 1 |
| 14121 | chr2 | - | 130107583,130107142                     | 130107644,130107276                     | 2 |
|       | chr2 | - | 130109906,130106691                     | 130109984,130106838                     | 1 |

|       |       |   |                                         |                                         |   |
|-------|-------|---|-----------------------------------------|-----------------------------------------|---|
| 14123 | chr2  | - | 130222066,130216973                     | 130222228,130217076                     | 1 |
| 14127 | chr2  | + | 130264518,130265171                     | 130264641,130265261                     | 1 |
|       | chr2  | + | 130264781,130269249                     | 130264837,130269470                     | 1 |
|       | chr2  | + | 130266442,130267529                     | 130266478,130267637                     | 2 |
| 14128 | chr2  | + | 130357824,130370156                     | 130357915,130370233                     | 1 |
|       | chr2  | + | 130358819,130370684                     | 130358896,130370819                     | 1 |
|       | chr2  | + | 130366218,130377932                     | 130366385,130378068                     | 1 |
|       | chr2  | + | 130367030,130379129                     | 130367166,130379759                     | 3 |
|       | chr2  | + | 130370684,130379129                     | 130370819,130379759                     | 1 |
| 14136 | chr2  | - | 130480921,130480397,130490210,130484324 | 130480978,130480446,130490381,130484447 | 2 |
| 14139 | chr2  | - | 130611194,130535673                     | 130611276,130535767                     | 1 |
| 14142 | chr2  | - | 130866751,130865911                     | 130866886,130866061                     | 1 |
| 1416  | chr10 | + | 7309614,7328341                         | 7310411,7328437                         | 1 |
| 14188 | chr2  | + | 136581803,136589308                     | 136581937,136589357                     | 3 |
| 14189 | chr2  | - | 136706266,136701824                     | 136707375,136701935                     | 1 |
| 14197 | chr2  | - | 139980529,139954935                     | 139980677,139955023                     | 1 |
| 14198 | chr2  | + | 140007309,140014472,139996514           | 140007357,140014648,139996669           | 2 |
| 14199 | chr2  | - | 140130344,140069649                     | 140130513,140069724                     | 2 |
| 14201 | chr2  | + | 140226597,142122251                     | 140226714,142122332                     | 1 |
|       | chr2  | + | 140650787,142199966                     | 140650817,142200044                     | 1 |
|       | chr2  | + | 141636325,142144150                     | 141636399,142144243                     | 1 |
|       | chr2  | + | 142002329,142210056                     | 142002411,142210124                     | 1 |
| 14205 | chr2  | + | 142890277,142895109                     | 142890366,142895160                     | 1 |
| 14212 | chr2  | - | 143778969,143776163                     | 143779065,143776259                     | 2 |
|       | chr2  | - | 143782503,143777927                     | 143782596,143778011                     | 1 |
| 14215 | chr2  | - | 144082835,144080461                     | 144082931,144080548                     | 1 |
|       | chr2  | - | 144084792,144079397                     | 144084914,144079557                     | 2 |
|       | chr2  | - | 144087655,144078180                     | 144087760,144078266                     | 1 |
| 14224 | chr2  | + | 144382012,144416021                     | 144382078,144416479                     | 1 |
| 14228 | chr2  | + | 145068346,145406707                     | 145068391,145406782                     | 1 |
| 14234 | chr2  | + | 145827590,145837813                     | 145827655,145837989                     | 2 |
| 14240 | chr2  | + | 146689442,146778713,146795279,146795692 | 146689605,146778800,146795323,146795825 | 1 |
| 14252 | chr2  | + | 148512249,148515811                     | 148512344,148515969                     | 1 |
| 14271 | chr2  | - | 150425463,150415768                     | 150425553,150415861                     | 1 |
| 14277 | chr2  | - | 150663087,150661008,150665455,150663087 | 150663170,150661087,150665585,150663170 | 2 |
|       | chr2  | - | 150667981,150658250                     | 150668027,150658876                     | 4 |
|       | chr2  | - | 150667981,150660014                     | 150668027,150660142                     | 1 |
|       | chr2  | - | 150671979,150664476                     | 150672099,150664514                     | 1 |
| 1427  | chr10 | + | 7524753,7530159                         | 7524820,7530256                         | 1 |
| 142   | chr1  | - | 36410942,36401760                       | 36411059,36401891                       | 1 |
| 1434  | chr10 | - | 9555631,9536048                         | 9555755,9536121                         | 1 |
| 1441  | chr10 | + | 10890044,10910783                       | 10890301,10910885                       | 1 |
|       | chr10 | + | 10912283,10924978                       | 10912355,10925071                       | 1 |
| 1444  | chr10 | - | 12380576,12374496                       | 12380727,12374632                       | 1 |
| 1451  | chr10 | - | 13043869,12933200                       | 13043966,12934079                       | 1 |
| 14533 | chr2  | + | 152144448,152142069                     | 152144547,152142650                     | 1 |
| 1454  | chr10 | + | 13273042,13282620                       | 13273167,13283182                       | 1 |
| 14553 | chr2  | + | 152511833,152514572                     | 152511922,152514698                     | 1 |
|       | chr2  | + | 152511833,152517528,152521217,152525918 | 152512443,152517612,152521320,152526004 | 1 |
|       | chr2  | + | 152521217,152525918,152506786,152517528 | 152521320,152526004,152506869,152517612 | 1 |
| 14563 | chr2  | - | 152840969,152834625                     | 152841119,152835472                     | 1 |
| 14567 | chr2  | + | 153021046,153028073                     | 153021128,153028137                     | 1 |
| 1457  | chr10 | + | 13685882,13686184                       | 13686026,13686503                       | 2 |
|       | chr10 | + | 13724006,13853545                       | 13724081,13853700                       | 2 |
|       | chr10 | + | 13830470,13846257                       | 13830592,13846302                       | 1 |
| 14582 | chr2  | + | 153733822,153738325                     | 153733873,153738526                     | 2 |
| 14594 | chr2  | - | 154194547,154191697,154196371           | 154194651,154191798,154196691           | 1 |
| 1459  | chr10 | - | 14387737,14375138,14395739,14387737     | 14387914,14375651,14395848,14387914     | 3 |
| 14603 | chr2  | + | 154482761,154519679                     | 154483107,154520519                     | 2 |
| 14609 | chr2  | + | 155075656,155062313,155073506           | 155076009,155062353,155073674           | 2 |
| 14610 | chr2  | + | 155102199,155103493                     | 155102382,155103806                     | 1 |
|       | chr2  | + | 155102693,155103210                     | 155102749,155103493                     | 1 |
|       | chr2  | + | 155102833,155103493                     | 155102940,155103806                     | 1 |
| 14614 | chr2  | - | 155328755,155328371                     | 155329215,155328568                     | 1 |
| 14615 | chr2  | + | 155387688,155387688,155410785           | 155388479,155388479,155411460           | 2 |
| 14620 | chr2  | - | 155536579,155534667,155527762           | 155536704,155534812,155528328           | 1 |

|       |       |   |                               |                               |   |
|-------|-------|---|-------------------------------|-------------------------------|---|
| 14624 | chr2  | - | 155652062,155649600           | 155652661,155649776           | 1 |
| 14630 | chr2  | + | 155834100,155843532           | 155834171,155843588           | 1 |
|       | chr2  | + | 155834299,155843532           | 155834387,155843588           | 1 |
|       | chr2  | + | 155834595,155837084           | 155834715,155837142           | 1 |
|       | chr2  | + | 155843315,155843806           | 155843452,155844015           | 1 |
| 14632 | chr2  | + | 155895055,155893672           | 155895235,155894962           | 1 |
| 14637 | chr2  | - | 156004296,155987563,156004296 | 156004688,155987701,156004688 | 1 |
| 14655 | chr2  | - | 157019747,157017883           | 157019797,157018998           | 2 |
| 14657 | chr2  | + | 157119888,157143682           | 157119964,157143778           | 1 |
|       | chr2  | + | 157128141,157145856           | 157128247,157145932           | 1 |
|       | chr2  | + | 157128141,157151446           | 157128247,157152054           | 2 |
| 14660 | chr2  | + | 157264936,157284269           | 157265013,157284369           | 1 |
|       | chr2  | + | 157288714,157294218           | 157288818,157294295           | 1 |
| 14666 | chr2  | - | 157822812,157807538           | 157822961,157808196           | 2 |
| 14671 | chr2  | - | 158030395,158021486           | 158030544,158022389           | 1 |
| 14673 | chr2  | + | 158145407,158153252           | 158145499,158153316           | 1 |
| 14686 | chr2  | + | 160471632,160546314           | 160471998,160546409           | 1 |
|       | chr2  | + | 160472343,160528437           | 160472368,160528559           | 1 |
|       | chr2  | + | 160495835,160510183           | 160495938,160510239           | 2 |
| 14687 | chr2  | + | 160588091,160587474           | 160589020,160587659           | 2 |
| 1470  | chr10 | + | 17837470,17844685             | 17837540,17844939             | 1 |
| 14713 | chr2  | + | 163484186,163551192           | 163484228,163551894           | 1 |
| 14714 | chr2  | - | 163556840,163556033           | 163556968,163556135           | 1 |
| 1472  | chr10 | - | 17933490,17936589             | 17933984,17938198             | 1 |
|       | chr10 | - | 17936589,17933490             | 17938198,17933984             | 2 |
| 14760 | chr2  | + | 164611323,164615910           | 164611824,164617068           | 2 |
| 14766 | chr2  | + | 164659223,164660655           | 164659350,164660811           | 1 |
|       | chr2  | + | 164660337,164662681           | 164660424,164662757           | 1 |
|       | chr2  | + | 164660655,164663576           | 164660811,164663652           | 1 |
|       | chr2  | + | 164661129,164664140           | 164661221,164664230           | 3 |
| 14767 | chr2  | - | 164682386,164669934           | 164682497,164670002           | 1 |
| 14769 | chr2  | + | 164708274,164715914           | 164708444,164716008           | 2 |
| 14771 | chr2  | - | 164718186,164717879           | 164718270,164717961           | 1 |
| 14774 | chr2  | + | 164821821,164822609,164822879 | 164822018,164822743,164825231 | 1 |
| 14779 | chr2  | - | 165130399,165119740           | 165130478,165119823           | 1 |
| 14787 | chr2  | - | 165710107,165698526           | 165710188,165698723           | 5 |
| 14789 | chr2  | - | 165918954,165900994           | 165919124,165901048           | 1 |
|       | chr2  | - | 165958087,165901271           | 165958354,165901305           | 1 |
| 14793 | chr2  | + | 166756081,166766906           | 166756166,166766992           | 1 |
| 14795 | chr2  | + | 166856834,166860138           | 166856941,166860445           | 2 |
| 14819 | chr2  | - | 168043180,168032073           | 168043276,168032562           | 1 |
| 14823 | chr2  | - | 168475028,168465381           | 168475127,168465490           | 1 |
|       | chr2  | - | 168478067,168463000           | 168478238,168463204           | 1 |
|       | chr2  | - | 168501641,168474054           | 168501718,168474199           | 1 |
|       | chr2  | - | 168509212,168475028           | 168509293,168475127           | 1 |
|       | chr2  | - | 168536331,168465381           | 168536476,168465490           | 1 |
|       | chr2  | - | 168567181,168516465           | 168567300,168516524           | 1 |
| 14838 | chr2  | + | 170626349,170704673           | 170626457,170705268           | 1 |
|       | chr2  | + | 170655568,170666919           | 170655688,170667055           | 1 |
| 14874 | chr2  | + | 174109820,174171490           | 174110009,174171558           | 1 |
|       | chr2  | + | 174121496,174171490           | 174122396,174171558           | 1 |
|       | chr2  | + | 174163121,174163121,174167153 | 174163585,174163585,174167208 | 2 |
|       | chr2  | + | 174163121,174163121,174171742 | 174163585,174163585,174172243 | 8 |
|       | chr2  | + | 174163121,174167153,174163121 | 174163585,174167208,174163585 | 4 |
| 14876 | chr2  | + | 174153414,174168700           | 174153442,174168798           | 3 |
| 14912 | chr2  | + | 176789205,176923364           | 176789260,176923491           | 1 |
| 14922 | chr2  | + | 178067526,177853679,178062842 | 178067667,177854007,178062898 | 2 |
| 14932 | chr2  | - | 179772087,179771080           | 179772207,179771278           | 1 |
|       | chr2  | - | 179772087,179774057,179772769 | 179772207,179774184,179772892 | 1 |
|       | chr2  | - | 179774057,179772087           | 179774184,179772207           | 2 |
|       | chr2  | - | 179774057,179772769           | 179774184,179772892           | 2 |
| 14934 | chr2  | + | 179812708,179818768           | 179812847,179818987           | 2 |
|       | chr2  | + | 179818049,179820084           | 179818165,179820607           | 1 |
| 14938 | chr2  | - | 179930076,179918024           | 179930183,179918179           | 2 |
| 14950 | chr2  | + | 180338838,180344760           | 180338880,180344805           | 1 |
| 14957 | chr2  | - | 180653839,180639081,180655388 | 180653919,180640373,180655641 | 2 |

|       |       |   |                                     |                                     |    |
|-------|-------|---|-------------------------------------|-------------------------------------|----|
| 14961 | chr2  | + | 180711011,180713875                 | 180711068,180713932                 | 1  |
| 14962 | chr2  | + | 180734737,180750247                 | 180734880,180750314                 | 1  |
| 14966 | chr2  | - | 180889967,180887488                 | 180890186,180887785                 | 3  |
|       | chr2  | - | 180891428,180882396                 | 180891720,180882811                 | 2  |
| 14973 | chr2  | - | 181043425,181041163                 | 181043601,181041528                 | 10 |
|       | chr2  | - | 181043851,181041920                 | 181043947,181042112                 | 3  |
| 14974 | chr2  | + | 181054489,181070597                 | 181054561,181070751                 | 1  |
|       | chr2  | + | 181089057,181090032,181088681       | 181089147,181090257,181088880       | 1  |
| 14976 | chr2  | + | 181099635,181115079                 | 181100081,181116099                 | 1  |
| 1497  | chr10 | + | 199701175,19997930                  | 19970286,19998151                   | 1  |
| 14983 | chr2  | - | 181307174,181304400                 | 181307191,181304508                 | 1  |
| 14987 | chr2  | + | 181350681,181356866                 | 181350800,181357022                 | 2  |
|       | chr2  | + | 181384801,181389540                 | 181384935,181389667                 | 1  |
| 14993 | chr2  | + | 181530351,181557360                 | 181530599,181557464                 | 2  |
| 149   | chr1  | - | 36611096,36607512                   | 36611245,36607673                   | 1  |
|       | chr1  | - | 36614860,36605497                   | 36615068,36607213                   | 1  |
| 15007 | chr3  | + | 8509526,8560265                     | 8509630,8561604                     | 6  |
| 1501  | chr10 | + | 20059514,20063863                   | 20059727,20064419                   | 2  |
| 15027 | chr3  | - | 10434357,10420739                   | 10434506,10420876                   | 1  |
| 1504  | chr10 | + | 20679417,20777958                   | 20679886,20778056                   | 1  |
| 1507  | chr10 | + | 21064882,21087447                   | 21065000,21087592                   | 1  |
|       | chr10 | + | 21088094,21078537,21087447          | 21088695,21078646,21087592          | 1  |
| 15109 | chr3  | - | 32496561,32488630                   | 32496706,32488832                   | 1  |
| 15112 | chr3  | + | 32635984,32649950                   | 32636127,32650481                   | 2  |
| 15114 | chr3  | - | 33030487,32979386,33030487          | 33030917,32979458,33030917          | 1  |
| 15118 | chr3  | + | 33956969,33953143                   | 33957153,33953253                   | 2  |
| 15144 | chr3  | - | 35549629,35523273                   | 35549707,35523383                   | 1  |
| 15147 | chr3  | - | 35889618,35862506                   | 35889740,35862614                   | 1  |
| 15153 | chr3  | - | 36360802,36349233                   | 36360916,36349356                   | 2  |
| 15155 | chr3  | + | 36451527,36460939                   | 36451673,36461086                   | 1  |
|       | chr3  | + | 36451956,36464350                   | 36452051,36464649                   | 1  |
|       | chr3  | + | 36452727,36460024                   | 36452847,36460113                   | 1  |
| 15157 | chr3  | - | 36509487,36472067                   | 36509550,36472544                   | 1  |
| 15160 | chr3  | + | 36928822,36947435                   | 36929003,36947570                   | 1  |
| 15180 | chr3  | + | 40583256,40589200                   | 40583355,40589320                   | 1  |
| 15196 | chr3  | - | 41531014,41451366                   | 41531070,41451563                   | 1  |
| 15199 | chr3  | + | 45187452,45196490                   | 45187511,45196796                   | 2  |
|       | chr3  | + | 45223328,45223328,45236395          | 45227633,45227633,45238501          | 14 |
| 15250 | chr3  | - | 57098533,57090985                   | 57099004,57091692                   | 1  |
| 15257 | chr3  | - | 57650791,57645816                   | 57650899,57647236                   | 1  |
| 15261 | chr3  | + | 58344961,58356490                   | 58345061,58356604                   | 1  |
|       | chr3  | + | 58349149,58360494                   | 58349294,58360560                   | 1  |
| 15287 | chr3  | - | 62296272,62290931                   | 62296354,62290987                   | 2  |
| 15317 | chr3  | + | 67253600,67260494                   | 67253738,67260632                   | 1  |
| 15325 | chr3  | + | 68821992,68836947                   | 68822133,68837180                   | 1  |
|       | chr3  | + | 68823096,68826147                   | 68823247,68826381                   | 1  |
|       | chr3  | + | 68825157,68836628                   | 68825322,68836811                   | 1  |
| 15331 | chr3  | + | 69528178,69552693                   | 69528313,69552968                   | 1  |
| 15335 | chr3  | - | 72762034,72739780                   | 72762186,72739837                   | 1  |
| 15337 | chr3  | + | 73398264,73363370,73398264          | 73398752,73363448,73398752          | 1  |
| 15339 | chr3  | - | 74909545,74841828                   | 74909720,74842011                   | 1  |
| 15355 | chr3  | - | 80495413,80494325                   | 80496454,80494440                   | 2  |
|       | chr3  | - | 80495413,80495241                   | 80496454,80495356                   | 2  |
|       | chr3  | - | 80506379,80488857                   | 80506578,80492636                   | 1  |
|       | chr3  | - | 80544880,80530753                   | 80545120,80530807                   | 1  |
| 15364 | chr3  | + | 82161965,82187437                   | 82162093,82187583                   | 1  |
|       | chr3  | + | 82161993,82175100                   | 82162177,82175324                   | 1  |
|       | chr3  | + | 82183999,82187129                   | 82184168,82187291                   | 1  |
| 15372 | chr3  | + | 82859459,82875111                   | 82859576,82875305                   | 1  |
|       | chr3  | + | 82860692,82863248                   | 82860799,82863302                   | 1  |
|       | chr3  | + | 82864955,82876032                   | 82865043,82876213                   | 1  |
| 15377 | chr3  | - | 83765439,83702208                   | 83765556,83702535                   | 1  |
| 15381 | chr3  | - | 84338508,84299985,84386335,84351855 | 84338617,84301813,84386547,84351957 | 1  |
| 15384 | chr3  | + | 84619399,84781194                   | 84619691,84781551                   | 1  |
| 15390 | chr3  | + | 85408936,85422745                   | 85409059,85422935                   | 1  |
|       | chr3  | + | 85420536,85422745,85422745,85448891 | 85420581,85422935,85422935,85448970 | 1  |



|       |       |   |                                     |                                     |    |
|-------|-------|---|-------------------------------------|-------------------------------------|----|
| 153   | chr1  | - | 36763714,36758903                   | 36763790,36759028                   | 1  |
| 15400 | chr3  | - | 86590072,86595362                   | 86591334,86596033                   | 2  |
|       | chr3  | - | 86595362,86590072                   | 86596033,86591334                   | 4  |
|       | chr3  | - | 86597140,86595362                   | 86597221,86596033                   | 1  |
|       | chr3  | - | 86634745,86597738                   | 86634793,86597835                   | 1  |
|       | chr3  | - | 86723671,86620279,86617598,86610043 | 86724803,86620352,86617656,86610163 | 1  |
| 15410 | chr3  | + | 87529658,87539727                   | 87529706,87539917                   | 1  |
| 15416 | chr3  | - | 87673504,87662835                   | 87674071,87663268                   | 1  |
| 15418 | chr3  | + | 87723465,87726856                   | 87723627,87726987                   | 1  |
| 15423 | chr3  | - | 87801666,87792614                   | 87801777,87792759                   | 2  |
|       | chr3  | - | 87804024,87798033                   | 87804152,87798255                   | 1  |
| 15426 | chr3  | - | 87860444,87861645,87860444          | 87860698,87861759,87860698          | 1  |
|       | chr3  | - | 87861842,87860444                   | 87861953,87860698                   | 1  |
| 15436 | chr3  | + | 88106689,88124381                   | 88106786,88124627                   | 1  |
|       | chr3  | + | 88113082,88125365                   | 88113269,88125688                   | 2  |
| 15439 | chr3  | + | 88154900,88164252                   | 88155503,88164327                   | 1  |
|       | chr3  | + | 88162574,88164675                   | 88162634,88164814                   | 1  |
| 15440 | chr3  | + | 88168510,88169596,88170826          | 88168545,88169724,88170923          | 1  |
| 15447 | chr3  | - | 88290729,88287968                   | 88290855,88288076                   | 1  |
| 15451 | chr3  | + | 88357637,88363539                   | 88357834,88363698                   | 1  |
| 15453 | chr3  | + | 88435832,88447266                   | 88435900,88447302                   | 1  |
| 15459 | chr3  | + | 88579160,88640911                   | 88579653,88641442                   | 1  |
| 15464 | chr3  | - | 88714804,88714051                   | 88714936,88714161                   | 1  |
|       | chr3  | - | 88715458,88714051                   | 88715593,88714161                   | 1  |
| 15465 | chr3  | - | 88732368,88730932,88729215          | 88732449,88730992,88729333          | 3  |
|       | chr3  | - | 88733317,88729215                   | 88733448,88729333                   | 1  |
| 15466 | chr3  | + | 88847040,88862409                   | 88847247,88862562                   | 2  |
| 15467 | chr3  | - | 88893590,88891640                   | 88893689,88892190                   | 1  |
|       | chr3  | - | 88893590,88892921                   | 88893689,88893027                   | 1  |
| 15472 | chr3  | + | 88981406,88985096                   | 88981579,88985198                   | 1  |
| 15481 | chr3  | - | 89072167,89073748,89072594          | 89072520,89073872,89072714          | 12 |
|       | chr3  | - | 89073748,89072594,89072167          | 89073872,89072714,89072520          | 1  |
| 15483 | chr3  | - | 89119991,89118872,89120384          | 89120057,89119489,89120674          | 1  |
| 15492 | chr3  | - | 89206321,89206594                   | 89206583,89207223                   | 14 |
|       | chr3  | - | 89206594,89206321                   | 89207223,89206583                   | 11 |
| 1549  | chr10 | + | 23898922,23907433                   | 23899016,23908765                   | 1  |
| 15500 | chr3  | - | 89566931,89557369                   | 89566976,89561192                   | 1  |
| 15507 | chr3  | - | 89804061,89804230                   | 89804175,89804913                   | 1  |
|       | chr3  | - | 89848775,89832246                   | 89848853,89832299                   | 1  |
| 15508 | chr3  | + | 89862406,89856775,89860128          | 89862573,89857041,89860246          | 1  |
| 15521 | chr3  | - | 90197667,90196133                   | 90197716,90196290                   | 1  |
| 15523 | chr3  | + | 90284525,90288375                   | 90284630,90288492                   | 1  |
|       | chr3  | + | 90285285,90290772                   | 90285388,90290834                   | 1  |
|       | chr3  | + | 90285285,90291148                   | 90285388,90291239                   | 1  |
|       | chr3  | + | 90289611,90286698                   | 90289690,90289384                   | 1  |
| 1555  | chr10 | + | 24629603,24632468,24632468          | 24629724,24633266,24633266          | 1  |
| 15609 | chr3  | + | 94284189,94290445                   | 94284272,94290589                   | 1  |
|       | chr3  | + | 94290715,94291624                   | 94291206,94291774                   | 2  |
|       | chr3  | + | 94291056,94295054                   | 94291490,94296115                   | 1  |
|       | chr3  | + | 94292060,94291056                   | 94292201,94291490                   | 1  |
| 15610 | chr3  | - | 94332833,94314963                   | 94332898,94315053                   | 1  |
| 15623 | chr3  | - | 94839159,94838487                   | 94839246,94838703                   | 1  |
| 15627 | chr3  | - | 94936746,94933640                   | 94936835,94933805                   | 1  |
|       | chr3  | - | 94937121,94936746,94933640          | 94937210,94936835,94933805          | 1  |
| 15630 | chr3  | + | 94972730,94974672                   | 94972819,94974819                   | 1  |
| 15642 | chr3  | - | 95132469,95128226,95127446          | 95132639,95128315,95128112          | 5  |
| 15647 | chr3  | + | 95342642,95350717                   | 95342765,95350883                   | 1  |
| 15650 | chr3  | + | 95435353,95432462                   | 95436039,95434415                   | 2  |
| 15654 | chr3  | - | 95549955,95545244                   | 95550093,95545359                   | 1  |
| 1565  | chr10 | + | 28216714,28315607                   | 28216751,28317203                   | 2  |
| 15663 | chr3  | + | 95740946,95749102                   | 95741118,95750899                   | 1  |
| 15666 | chr3  | - | 95803794,95836701,95803794          | 95804074,95836809,95804074          | 1  |
| 15670 | chr3  | + | 95988561,95997111                   | 95989530,95997271                   | 1  |
|       | chr3  | + | 95992247,95997655                   | 95992381,95999103                   | 1  |
| 1568  | chr10 | + | 28870049,28918750                   | 28870208,28919434                   | 2  |
| 15699 | chr3  | + | 96455073,96455668                   | 96455239,96455813                   | 1  |

|       |       |   |                                         |                                         |   |
|-------|-------|---|-----------------------------------------|-----------------------------------------|---|
| 1569  | chr10 | + | 28942026,28944040,28941591              | 28942106,28945220,28941936              | 4 |
|       | chr10 | + | 28942026,28944040,28944040              | 28942106,28945220,28945220              | 1 |
| 156   | chr1  | - | 36938178,36861312                       | 36938219,36861491                       | 1 |
| 15754 | chr3  | - | 101383696,101380841                     | 101383842,101380933                     | 3 |
|       | chr3  | - | 101390049,101385069                     | 101390242,101385193                     | 2 |
|       | chr3  | - | 101392928,101387667                     | 101393038,101387804                     | 1 |
|       | chr3  | - | 101393689,101383696                     | 101393888,101383842                     | 2 |
|       | chr3  | - | 101395703,101380841                     | 101395817,101380933                     | 1 |
| 15768 | chr3  | + | 102847079,102842614                     | 102847161,102846680                     | 1 |
|       | chr3  | + | 102854962,102860267                     | 102855075,102860400                     | 1 |
| 15772 | chr3  | + | 102978262,102981261,102982277           | 102978424,102981342,102983077           | 1 |
|       | chr3  | + | 102979541,102982277                     | 102979592,102983077                     | 2 |
| 1582  | chr10 | - | 31413442,31409124                       | 31413528,31411493                       | 2 |
| 15839 | chr3  | - | 107423369,107418678                     | 107424462,107418745                     | 2 |
|       | chr3  | - | 107427542,107423126                     | 107427649,107423192                     | 2 |
|       | chr3  | - | 107430305,107429653                     | 107430380,107429774                     | 1 |
| 15846 | chr3  | - | 107746515,107745619,107744106           | 107746667,107745684,107744202           | 1 |
| 15861 | chr3  | + | 108087049,108147771                     | 108087358,108147874                     | 1 |
| 15865 | chr3  | - | 108196853,108196257                     | 108196942,108196428                     | 1 |
|       | chr3  | - | 108197130,108196257                     | 108197258,108196428                     | 1 |
|       | chr3  | - | 108201796,108199636                     | 108201891,108199763                     | 1 |
|       | chr3  | - | 108203420,108196567                     | 108203541,108196750                     | 1 |
|       | chr3  | - | 108204063,108197130                     | 108204238,108197258                     | 1 |
| 15866 | chr3  | - | 108232158,108230177                     | 108232380,108230307                     | 2 |
|       | chr3  | - | 108236966,108232158                     | 108237125,108232380                     | 1 |
| 15893 | chr3  | - | 113322942,113318280                     | 113323085,113318429                     | 1 |
| 15895 | chr3  | + | 113855526,113896990                     | 113855634,113897098                     | 1 |
|       | chr3  | + | 113861002,113897647                     | 113861110,113897701                     | 1 |
|       | chr3  | + | 113889445,113909442                     | 113889499,113909478                     | 1 |
| 15906 | chr3  | - | 116204029,116195900                     | 116204088,116196005                     | 2 |
|       | chr3  | - | 116204029,116197000                     | 116204088,116197095                     | 2 |
| 15909 | chr3  | - | 116292651,116288672                     | 116292721,116288745                     | 2 |
| 15921 | chr3  | - | 119455861,119450707                     | 119456034,119450872                     | 2 |
| 15938 | chr3  | - | 122271670,122263750                     | 122271684,122263879                     | 1 |
| 15948 | chr3  | + | 122970413,122982062                     | 122970454,122982186                     | 1 |
|       | chr3  | + | 123056307,123058640                     | 123056404,123058759                     | 1 |
| 15960 | chr3  | + | 126544402,126545675                     | 126545628,126547972                     | 1 |
| 15962 | chr3  | - | 126624524,126632639,126624524           | 126626889,126632804,126626889           | 1 |
|       | chr3  | - | 126632639,126624524                     | 126632804,126626889                     | 1 |
|       | chr3  | - | 126749642,126701241                     | 126749741,126701370                     | 2 |
|       | chr3  | - | 127042049,126684717                     | 127042110,126684862                     | 1 |
| 15965 | chr3  | + | 127258213,127319176                     | 127258303,127319438                     | 1 |
| 15971 | chr3  | - | 127540066,127522596                     | 127540410,127523703                     | 1 |
| 15993 | chr3  | - | 130433235,130433038,130433038,130432146 | 130433259,130433226,130433226,130432220 | 3 |
| 15999 | chr3  | + | 131305927,131268808,131305927           | 131306632,131269014,131306632           | 1 |
| 16011 | chr3  | + | 132989611,132993356,133002226,133030786 | 132989665,132993476,133002313,133030914 | 1 |
|       | chr3  | + | 133002226,133030786,132989611           | 133002313,133030914,132989665           | 1 |
| 16015 | chr3  | + | 133902366,133899458                     | 133902838,133899650                     | 3 |
| 16018 | chr3  | + | 134891720,134896691                     | 134891879,134896766                     | 1 |
| 16026 | chr3  | - | 135253279,135247618                     | 135253452,135248479                     | 1 |
| 16029 | chr3  | + | 136333733,136553399                     | 136333865,136553494                     | 1 |
|       | chr3  | + | 136333733,136568262                     | 136333865,136568337                     | 1 |
|       | chr3  | + | 136550910,136584796                     | 136550988,136584881                     | 1 |
|       | chr3  | + | 136553399,136597992                     | 136553494,136598743                     | 1 |
| 1602  | chr10 | + | 36704932,36707885                       | 36705045,36707960                       | 1 |
|       | chr10 | + | 36706112,36720174                       | 36706230,36720232                       | 1 |
|       | chr10 | + | 36713581,36717199,36717772,36718219     | 36715917,36717308,36717903,36718375     | 2 |
| 1603  | chr10 | - | 36857329,36853048                       | 36858730,36856741                       | 1 |
| 16048 | chr3  | + | 138110046,138118048                     | 138110188,138118463                     | 2 |
|       | chr3  | + | 138113862,138116705                     | 138114082,138116841                     | 1 |
| 16075 | chr3  | + | 144253575,144259786                     | 144253639,144260640                     | 1 |
| 1607  | chr10 | + | 38814700,38824942                       | 38814890,38825036                       | 2 |
| 16086 | chr3  | + | 144789986,144807275                     | 144790115,144807380                     | 1 |
|       | chr3  | + | 144789986,144809726                     | 144790115,144809885                     | 1 |
| 16087 | chr3  | + | 145006639,145171802                     | 145006684,145171856                     | 1 |
| 16088 | chr3  | + | 145241408,145255779                     | 145241494,145255848                     | 1 |

|       |       |   |                                         |                                         |    |
|-------|-------|---|-----------------------------------------|-----------------------------------------|----|
| 16090 | chr3  | + | 145515214,145552047                     | 145515288,145552191                     | 1  |
| 16092 | chr3  | + | 145600995,145606725                     | 145601292,145607790                     | 1  |
| 16102 | chr3  | - | 146182350,146169381                     | 146182407,146169539                     | 1  |
| 16107 | chr3  | + | 146602939,146606969                     | 146603141,146607172                     | 1  |
| 1610  | chr10 | + | 39245206,39253439                       | 39245310,39253516                       | 1  |
| 16115 | chr3  | - | 151412108,151410581,151408454           | 151412608,151410618,151408601           | 2  |
| 16121 | chr3  | + | 151889043,151895358,151885792,151886249 | 151889181,151897534,151885944,151887628 | 2  |
| 16122 | chr3  | - | 151910896,151915771,151911143           | 151911067,151915920,151911332           | 1  |
|       | chr3  | - | 151915771,151911143,151916014           | 151915920,151911332,151916093           | 5  |
| 16124 | chr3  | + | 152021109,152045874                     | 152021163,152045956                     | 1  |
|       | chr3  | + | 152044678,152045874,152052704           | 152044848,152045956,152052807           | 1  |
| 16135 | chr3  | - | 153573654,153571753,153571018           | 153573852,153571879,153571168           | 3  |
| 1613  | chr10 | + | 39526640,39587098                       | 39526789,39587308                       | 1  |
| 16154 | chr3  | - | 157675743,157675273                     | 157675860,157675412                     | 1  |
|       | chr3  | - | 157679285,157675273                     | 157679417,157675412                     | 2  |
|       | chr3  | - | 157685804,157687661                     | 157686386,157687725                     | 3  |
| 16180 | chr4  | - | 6346052,6325955                         | 6347074,6326106                         | 1  |
| 16186 | chr4  | - | 9564805,9560262                         | 9564850,9563116                         | 1  |
|       | chr4  | - | 9566344,9548056                         | 9566494,9549373                         | 1  |
| 16192 | chr4  | - | 10997346,10989196,10988007              | 10997469,10989299,10988141              | 1  |
| 16199 | chr4  | + | 11454794,11453741                       | 11455030,11454768                       | 2  |
| 16211 | chr4  | - | 12084797,12082795,12097104,12091234     | 12084911,12082915,12098365,12091339     | 1  |
|       | chr4  | - | 12084797,12092489                       | 12084911,12095471                       | 8  |
|       | chr4  | - | 12091234,12082795                       | 12091339,12082915                       | 1  |
|       | chr4  | - | 12091234,12097104                       | 12091339,12098365                       | 1  |
|       | chr4  | - | 12092489,12084797                       | 12095471,12084911                       | 6  |
| 16214 | chr4  | + | 13670448,13698625                       | 13670876,13698692                       | 2  |
| 1621  | chr10 | - | 39969008,39977018,39970961              | 39969637,39977099,39971075              | 1  |
| 16224 | chr4  | - | 15858271,15844386                       | 15858329,15846241                       | 1  |
|       | chr4  | - | 15858271,15846978                       | 15858329,15847125                       | 1  |
| 16231 | chr4  | - | 19479390,19460201                       | 19479465,19460261                       | 1  |
| 16232 | chr4  | + | 19529539,19532549                       | 19532517,19532683                       | 10 |
| 16244 | chr4  | + | 21784326,21787966                       | 21784515,21788138                       | 1  |
| 16254 | chr4  | - | 24636099,24556306                       | 24636198,24556499                       | 1  |
| 16263 | chr4  | + | 28740301,28870472                       | 28740630,28870528                       | 1  |
| 16269 | chr4  | + | 32818889,32852083                       | 32819060,32852251                       | 1  |
| 16274 | chr4  | + | 33130831,33136656,33136656              | 33130961,33139339,33139339              | 1  |
| 16283 | chr4  | + | 34497863,34512376                       | 34498522,34512526                       | 2  |
| 16285 | chr4  | + | 34562226,34604415                       | 34562275,34604490                       | 1  |
|       | chr4  | + | 34584200,34604415                       | 34584284,34604490                       | 1  |
|       | chr4  | + | 34603401,34604415                       | 34603511,34604490                       | 1  |
| 1628  | chr10 | + | 40646289,40652918                       | 40646424,40653091                       | 1  |
| 16301 | chr4  | + | 40111641,40133348                       | 40111810,40133473                       | 1  |
|       | chr4  | + | 40123528,40131933                       | 40123668,40132090                       | 1  |
| 16305 | chr4  | - | 40226190,40219842                       | 40226401,40219887                       | 1  |
| 16309 | chr4  | - | 40641884,40650169,40649756              | 40642169,40650220,40649949              | 1  |
|       | chr4  | - | 40642409,40641884,40650169,40649756     | 40642456,40642169,40650220,40649949     | 1  |
|       | chr4  | - | 40644249,40640422                       | 40644386,40640482                       | 1  |
|       | chr4  | - | 40650169,40649756,40642409,40641884     | 40650220,40649949,40642456,40642169     | 3  |
| 1630  | chr10 | - | 40997163,40940704                       | 40997320,40940791                       | 3  |
| 16312 | chr4  | - | 40698957,40686551                       | 40699086,40686719                       | 1  |
| 16321 | chr4  | - | 41065681,41063627                       | 41065799,41063752                       | 1  |
|       | chr4  | - | 41068039,41064692                       | 41068160,41064845                       | 1  |
|       | chr4  | - | 41070491,41067039                       | 41070692,41067217                       | 1  |
| 1632  | chr10 | + | 41199424,41202409                       | 41199580,41202554                       | 1  |
|       | chr10 | + | 41200090,41204790                       | 41200191,41205061                       | 1  |
| 16336 | chr4  | - | 41670066,41661829                       | 41670190,41662291                       | 2  |
| 16342 | chr4  | - | 41716342,41718010,41716990              | 41716527,41718108,41717085              | 1  |
| 1641  | chr10 | - | 41671406,41634798                       | 41671552,41637025                       | 1  |
| 16455 | chr4  | + | 42935438,42946487                       | 42935565,42946869                       | 5  |
| 16456 | chr4  | + | 42963721,42963267                       | 42963815,42963614                       | 1  |
| 16458 | chr4  | - | 42998025,42995712                       | 42998138,42996021                       | 1  |
| 16461 | chr4  | - | 43042641,43042150                       | 43042776,43042230                       | 1  |
|       | chr4  | - | 43043842,43043111,43042641              | 43043980,43043170,43042776              | 1  |
| 16464 | chr4  | + | 43250568,43276171                       | 43250710,43277745                       | 1  |
| 16466 | chr4  | + | 43427499,43439319                       | 43429590,43439958                       | 1  |

|       |       |   |                                     |                                     |   |
|-------|-------|---|-------------------------------------|-------------------------------------|---|
|       | chr4  | + | 43435312,43439319                   | 43435498,43439958                   | 1 |
|       | chr4  | + | 43436546,43438168                   | 43436623,43439000                   | 2 |
| 16476 | chr4  | - | 43572214,43563833,43572214          | 43572589,43563910,43572589          | 1 |
| 16477 | chr4  | + | 43576152,43578338                   | 43576223,43578407                   | 1 |
| 16481 | chr4  | + | 43646396,43661218                   | 43646602,43661287                   | 1 |
|       | chr4  | + | 43654155,43663579                   | 43654202,43663671                   | 1 |
|       | chr4  | + | 43661218,43663265,43660342          | 43661287,43663364,43660489          | 1 |
| 16485 | chr4  | + | 43681842,43702298                   | 43682044,43702445                   | 1 |
| 16497 | chr4  | + | 44025133,44038320                   | 44025880,44038432                   | 1 |
|       | chr4  | + | 44031684,44043086                   | 44031722,44043140                   | 2 |
|       | chr4  | + | 44031684,44045272                   | 44031722,44045718                   | 2 |
|       | chr4  | + | 44038320,44044271,44031684,44032745 | 44038432,44044307,44031722,44032863 | 1 |
| 16500 | chr4  | + | 44359995,44373743                   | 44360227,44373847                   | 1 |
|       | chr4  | + | 44363813,44376581,44376581          | 44363982,44377547,44377547          | 1 |
| 1651  | chr10 | + | 42514580,42524881                   | 42514642,42525036                   | 1 |
| 16530 | chr4  | + | 46502200,46515306                   | 46502362,46516310                   | 1 |
| 16547 | chr4  | - | 48469605,48445979                   | 48469783,48446190                   | 1 |
|       | chr4  | - | 48472735,48469605                   | 48472974,48469783                   | 1 |
| 16548 | chr4  | + | 48552950,48573715                   | 48553143,48574791                   | 1 |
| 16549 | chr4  | + | 48627828,48674872                   | 48627855,48676003                   | 1 |
| 16560 | chr4  | + | 49644973,49662597                   | 49645384,49662719                   | 1 |
|       | chr4  | + | 49662141,49665936                   | 49662277,49666149                   | 2 |
| 16567 | chr4  | + | 52455124,52462192                   | 52455274,52462303                   | 1 |
|       | chr4  | + | 52455124,52464099                   | 52455274,52464249                   | 1 |
|       | chr4  | + | 52478804,52489515                   | 52478940,52489716                   | 1 |
| 16586 | chr4  | + | 55395351,55403722                   | 55395487,55404084                   | 1 |
| 16592 | chr4  | - | 56785887,56769988                   | 56785973,56770143                   | 1 |
| 16606 | chr4  | - | 58156330,58059413                   | 58158209,58059509                   | 1 |
| 1660  | chr10 | - | 43596277,43600719                   | 43596483,43602064                   | 1 |
|       | chr10 | - | 43614320,43604748,43615814          | 43614417,43604924,43615974          | 1 |
| 16610 | chr4  | - | 58816541,58812902                   | 58816630,58813192                   | 2 |
|       | chr4  | - | 58840879,58825515                   | 58840934,58825582                   | 1 |
|       | chr4  | - | 58843205,58843425                   | 58843329,58845677                   | 4 |
|       | chr4  | - | 58843425,58843205                   | 58845677,58843329                   | 3 |
| 1667  | chr10 | + | 44791858,44872860                   | 44791933,44872992                   | 1 |
| 16699 | chr4  | - | 62013466,61975287                   | 62013579,61975459                   | 1 |
| 16707 | chr4  | - | 62172735,62171901,62171548          | 62172819,62171957,62171635          | 4 |
| 16731 | chr4  | - | 63643684,63623020                   | 63643957,63623184                   | 1 |
| 16758 | chr4  | + | 73807602,73847892                   | 73807677,73848118                   | 2 |
| 16761 | chr4  | - | 77571413,75717847                   | 77571468,75717938                   | 1 |
| 16776 | chr4  | + | 84602903,84625227                   | 84604507,84625425                   | 1 |
| 16777 | chr4  | + | 85023297,85027308                   | 85023431,85027412                   | 1 |
| 16788 | chr4  | + | 86563297,86563297,86577935          | 86566779,86566779,86580726          | 1 |
| 16792 | chr4  | - | 88083363,88068894                   | 88083467,88069001                   | 1 |
| 167   | chr1  | - | 37889250,37867816,37889250          | 37892180,37867872,37892180          | 2 |
| 16920 | chr4  | - | 94249171,94241856                   | 94249391,94241925                   | 1 |
| 16922 | chr4  | + | 94327638,94359641                   | 94327679,94359924                   | 1 |
| 16931 | chr4  | + | 95363650,95504275                   | 95363766,95504350                   | 2 |
| 16955 | chr4  | - | 98658054,98636320                   | 98658150,98636417                   | 1 |
|       | chr4  | - | 98732068,98611818                   | 98732149,98612055                   | 2 |
|       | chr4  | - | 98746110,98611330                   | 98746323,98611474                   | 1 |
| 1695  | chr10 | - | 53367377,53360750,53368907          | 53367562,53360868,53369035          | 1 |
|       | chr10 | - | 53409756,53397536,53394941          | 53409954,53397698,53395063          | 1 |
| 16968 | chr4  | - | 100861683,100824578                 | 100861807,100826195                 | 2 |
| 16992 | chr4  | + | 103003909,103038577,103038577       | 103003984,103039033,103039033       | 1 |
| 16996 | chr4  | + | 104352674,104390814                 | 104352987,104390877                 | 1 |
| 17013 | chr4  | - | 106340641,106334860                 | 106340859,106335836                 | 1 |
| 17017 | chr4  | + | 106719846,106720628                 | 106719875,106722299                 | 2 |
| 17023 | chr4  | + | 106851296,106872972                 | 106851522,106873592                 | 1 |
|       | chr4  | + | 106858382,106863139,106865066       | 106858488,106863292,106865148       | 5 |
| 17028 | chr4  | + | 106991546,107009041                 | 106991710,107009129                 | 1 |
|       | chr4  | + | 107009041,107023018                 | 107009129,107023143                 | 1 |
| 17030 | chr4  | + | 107107195,107107323                 | 107107299,107107502                 | 5 |
| 17039 | chr4  | + | 107562723,107564559                 | 107562807,107564641                 | 1 |
|       | chr4  | + | 107567477,107569266,107569266       | 107567543,107569720,107569720       | 1 |
| 1703  | chr10 | - | 57245030,57244125                   | 57247632,57244205                   | 1 |

|       |       |   |                                         |                                         |   |
|-------|-------|---|-----------------------------------------|-----------------------------------------|---|
| 17044 | chr4  | + | 107846591,107849677,107851511           | 107846779,107849728,107851912           | 4 |
|       | chr4  | + | 107849677,107851511,107846591           | 107849728,107851912,107846779           | 1 |
| 17050 | chr4  | + | 108184640,108215266                     | 108184815,108215314                     | 1 |
|       | chr4  | + | 108215398,108221845                     | 108215481,108222018                     | 1 |
| 17054 | chr4  | + | 108299084,108302882                     | 108299195,108302941                     | 1 |
| 17055 | chr4  | - | 108329531,108316940                     | 108329612,108317046                     | 1 |
|       | chr4  | - | 108361753,108333169                     | 108361874,108333320                     | 1 |
| 17060 | chr4  | + | 108700040,108731186                     | 108700136,108731239                     | 1 |
| 17063 | chr4  | + | 108993732,109002296                     | 108993822,109002382                     | 1 |
| 17075 | chr4  | + | 111103621,111126689                     | 111103755,111126903                     | 1 |
| 1709  | chr10 | + | 57718273,57732009                       | 57718319,57734454                       | 1 |
| 17114 | chr4  | - | 115677604,115673391                     | 115677811,115673432                     | 1 |
| 17121 | chr4  | + | 115827667,115828064                     | 115827751,115828123                     | 1 |
| 17125 | chr4  | - | 115990313,115984283                     | 115990446,115984393                     | 2 |
|       | chr4  | - | 116108048,115989581                     | 116108196,115989643                     | 1 |
| 17126 | chr4  | + | 116205162,116210404,116202275,116205162 | 116205383,116210840,116202413,116205383 | 2 |
| 1712  | chr10 | + | 57960695,57962944                       | 57960810,57963996                       | 1 |
|       | chr10 | + | 57970268,57975826,57986885              | 57970389,57976005,57987044              | 1 |
| 17132 | chr4  | - | 116310580,116309114                     | 116310653,116309274                     | 1 |
|       | chr4  | - | 116311565,116309114                     | 116311765,116309274                     | 3 |
|       | chr4  | - | 116312414,116318108,116313595           | 116312610,116318198,116313747           | 1 |
|       | chr4  | - | 116313595,116312414,116310580           | 116313747,116312610,116310653           | 1 |
|       | chr4  | - | 116323943,116313595                     | 116324256,116313747                     | 2 |
|       | chr4  | - | 116323943,116314462,116323943           | 116324256,116314582,116324256           | 1 |
|       | chr4  | - | 116323943,116314462                     | 116324256,116314582                     | 1 |
| 17145 | chr4  | + | 116701015,116759293                     | 116701161,116759454                     | 1 |
| 17151 | chr4  | - | 116851005,116834614                     | 116851189,116834719                     | 1 |
| 17155 | chr4  | - | 116950611,116945851                     | 116950708,116945960                     | 2 |
|       | chr4  | - | 116961630,116945657                     | 116961673,116945732                     | 1 |
| 17156 | chr4  | + | 117223098,117255204                     | 117223335,117255321                     | 2 |
|       | chr4  | + | 117223098,117255204,117265675           | 117223335,117255321,117265675           | 2 |
|       | chr4  | + | 117261702,117287773,117346345           | 117261762,117287846,117346886           | 1 |
|       | chr4  | + | 117265675,117321911                     | 117265767,117322011                     | 1 |
| 17157 | chr4  | - | 117348554,117347625                     | 117348740,117347921                     | 1 |
| 17159 | chr4  | + | 117536517,117540652                     | 117536621,117541910                     | 1 |
| 17161 | chr4  | - | 117553472,117550043,117550043,117549484 | 117553708,117550234,117550234,117549589 | 6 |
|       | chr4  | - | 117555706,117549701                     | 117556074,117549824                     | 1 |
| 17162 | chr4  | - | 117558233,117556934                     | 117558285,117557246                     | 1 |
|       | chr4  | - | 117558408,117556934                     | 117558478,117557246                     | 1 |
|       | chr4  | - | 117558408,117557708                     | 117558478,117557899                     | 1 |
|       | chr4  | - | 117558672,117558233                     | 117558750,117558285                     | 1 |
|       | chr4  | - | 117559194,117558672                     | 117559243,117558750                     | 3 |
| 17164 | chr4  | - | 117567097,117574162,117567348           | 117567262,117574243,117567530           | 2 |
|       | chr4  | - | 117567348,117567097,117574162,117567348 | 117567450,117567262,117574243,117567530 | 1 |
|       | chr4  | - | 117567816,117567348,117573253,117568167 | 117567906,117567450,117573350,117568234 | 1 |
|       | chr4  | - | 117573253,117568167,117573253,117568167 | 117573350,117568234,117573350,117568234 | 1 |
|       | chr4  | - | 117573253,117568167                     | 117573350,117568234                     | 1 |
| 17168 | chr4  | - | 117884931,117882973                     | 117885086,117883109                     | 1 |
| 17170 | chr4  | - | 118044424,118041948                     | 118044624,118042029                     | 1 |
| 17171 | chr4  | + | 118081941,118085268                     | 118081991,118085350                     | 1 |
| 17180 | chr4  | + | 118294674,118296215                     | 118294798,118296291                     | 1 |
|       | chr4  | + | 118294674,118298424                     | 118294798,118300379                     | 1 |
| 171   | chr1  | + | 37947397,37950783                       | 37947429,37950860                       | 2 |
|       | chr1  | + | 37947397,37950783,37954532              | 37947429,37950860,37954679              | 5 |
| 17201 | chr4  | - | 118905187,118900631                     | 118905311,118900718                     | 1 |
| 1721  | chr10 | + | 59213251,59302422                       | 59213295,59302531                       | 3 |
| 17224 | chr4  | - | 120462981,120446276                     | 120463094,120446372                     | 3 |
| 17236 | chr4  | + | 122525675,122531622,122534752           | 122525778,122531721,122536418           | 2 |
| 17238 | chr4  | - | 122629232,122626509                     | 122629371,122626622                     | 2 |
| 17240 | chr4  | + | 122726011,122726719,122729726,122731365 | 122726123,122726797,122729844,122732177 | 3 |
| 17243 | chr4  | - | 122814768,122804367,122804367           | 122814812,122804689,122804689           | 1 |
| 17247 | chr4  | + | 122960153,122973172,122974921           | 122961050,122973300,122975015           | 1 |
| 17250 | chr4  | - | 123042515,123038152                     | 123042590,123038270                     | 1 |
|       | chr4  | - | 123042515,123038152,123043537           | 123042590,123038270,123043692           | 2 |
| 17272 | chr4  | - | 124359436,124356007                     | 124359567,124356230                     | 1 |
| 17275 | chr4  | + | 124423315,124472599                     | 124423426,124472713                     | 1 |

|       |       |   |                                         |                                         |   |
|-------|-------|---|-----------------------------------------|-----------------------------------------|---|
| 1727  | chr10 | + | 59586557,59594083                       | 59586672,59596661                       | 1 |
| 17286 | chr4  | + | 124718180,124730698                     | 124718365,124730778                     | 2 |
| 17296 | chr4  | + | 125725878,125732204                     | 125725957,125732396                     | 1 |
| 1729  | chr10 | + | 59755252,59762526                       | 59755327,59762806                       | 3 |
|       | chr10 | + | 59756096,59758693                       | 59756222,59758750                       | 1 |
|       | chr10 | + | 59757712,59763285                       | 59757856,59763366                       | 2 |
|       | chr10 | + | 59758693,59762211                       | 59758750,59762307                       | 1 |
| 17300 | chr4  | + | 125825246,125825932                     | 125825875,125826289                     | 1 |
| 17303 | chr4  | - | 125911341,125910608                     | 125911480,125910651                     | 1 |
|       | chr4  | - | 125914139,125911566,125911566,125911341 | 125914303,125911762,125911762,125911480 | 1 |
|       | chr4  | - | 125915765,125910111                     | 125915876,125910305                     | 2 |
|       | chr4  | - | 125919260,125910836                     | 125919611,125910890                     | 1 |
| 17314 | chr4  | + | 126383301,126354909,126364272           | 126383464,126355089,126364343           | 1 |
| 17316 | chr4  | - | 126429184,126425721                     | 126429325,126425963                     | 1 |
| 17319 | chr4  | + | 126703098,126707070                     | 126703295,126708040                     | 3 |
| 17321 | chr4  | + | 126712887,126714175                     | 126713098,126714252                     | 2 |
| 17325 | chr4  | + | 126891926,126913393                     | 126892240,126914265                     | 1 |
| 17333 | chr4  | + | 127736205,127954394                     | 127736422,127954507                     | 1 |
|       | chr4  | + | 128059096,128089938                     | 128059235,128090095                     | 1 |
| 17338 | chr4  | + | 128386742,128389302                     | 128386907,128389603                     | 1 |
| 17343 | chr4  | - | 128609389,128607476                     | 128609735,128608194                     | 3 |
| 17348 | chr4  | - | 128788818,128798465,128789918           | 128789769,128798547,128790024           | 1 |
| 17351 | chr4  | + | 128867194,128895674                     | 128867316,128896851                     | 3 |
|       | chr4  | + | 128883372,128892469                     | 128883453,128892663                     | 2 |
| 17359 | chr4  | - | 129103008,129106428                     | 129105071,129110555                     | 2 |
| 17366 | chr4  | - | 129234057,129233887                     | 129234376,129233991                     | 1 |
| 17368 | chr4  | - | 129272302,129270585                     | 129272430,129270675                     | 4 |
|       | chr4  | - | 129274117,129269217                     | 129274183,129269378                     | 3 |
| 17369 | chr4  | + | 129278226,129278650,129279438           | 129278487,129278777,129279505           | 1 |
|       | chr4  | + | 129278226,129284330,129284699           | 129278487,129284423,129285123           | 1 |
|       | chr4  | + | 129278650,129279438                     | 129278777,129279505                     | 1 |
|       | chr4  | + | 129284699,129278226,129284330           | 129285123,129278378,129284423           | 1 |
|       | chr4  | + | 129284699,129278650,129279438           | 129285123,129278777,129279505           | 1 |
| 17371 | chr4  | - | 129297700,129296517,129298227,129297700 | 129297723,129296690,129298394,129297723 | 1 |
|       | chr4  | - | 129299843,129296518                     | 129300031,129298394                     | 1 |
| 17372 | chr4  | - | 129309333,129303326                     | 129309528,129306442                     | 1 |
| 17374 | chr4  | - | 129369879,129361555                     | 129369962,129361743                     | 1 |
| 17376 | chr4  | + | 129522305,129524957                     | 129522436,129527219                     | 1 |
| 17380 | chr4  | + | 129682268,129695904                     | 129682352,129696524                     | 2 |
|       | chr4  | + | 129689068,129695158                     | 129689195,129695198                     | 1 |
|       | chr4  | + | 129695904,129698806                     | 129696524,129698905                     | 1 |
| 17381 | chr4  | + | 129763462,129769983                     | 129763498,129770025                     | 1 |
| 17386 | chr4  | - | 129942312,129932599                     | 129942474,129932809                     | 1 |
| 17388 | chr4  | - | 130004436,130015727,130006817           | 130004582,130015828,130006918           | 1 |
|       | chr4  | - | 130015727,130006817                     | 130015828,130006918                     | 1 |
|       | chr4  | - | 130031383,129993328                     | 130031504,129994052                     | 2 |
|       | chr4  | - | 130031383,130015727,130006817           | 130031504,130015828,130006918           | 1 |
| 17390 | chr4  | + | 130165691,130167602                     | 130165906,130167684                     | 1 |
| 17391 | chr4  | + | 130305326,130330326                     | 130305465,130330519                     | 2 |
| 1739  | chr10 | + | 60643062,60648049                       | 60643428,60648131                       | 1 |
| 17400 | chr4  | - | 131491653,131484406                     | 131491782,131484487                     | 2 |
| 17423 | chr4  | + | 132329741,132330931                     | 132330150,132331048                     | 1 |
| 17435 | chr4  | - | 132833445,132825692,132824110           | 132833705,132825724,132824241           | 1 |
| 17437 | chr4  | + | 132975839,132976419                     | 132975910,132976534                     | 1 |
| 17443 | chr4  | + | 133133821,133136565                     | 133134249,133136625                     | 3 |
| 17446 | chr4  | - | 133183114,133168837                     | 133183275,133168940                     | 1 |
| 17452 | chr4  | - | 133556639,133524971                     | 133556779,133527168                     | 1 |
| 17454 | chr4  | + | 133637643,133645186                     | 133637783,133645310                     | 1 |
| 17478 | chr4  | - | 134392681,134362431                     | 134392949,134362606                     | 1 |
| 17480 | chr4  | - | 134465527,134469039                     | 134465640,134469176                     | 1 |
| 17481 | chr4  | + | 134481207,134481940,134479789           | 134481347,134482733,134480397           | 1 |
|       | chr4  | + | 134481207,134482845                     | 134481347,134483285                     | 3 |
| 17485 | chr4  | - | 134885287,134883006,134880733           | 134885432,134883138,134881195           | 1 |
| 17488 | chr4  | - | 135004815,135001334,135004815           | 135008487,135001660,135008487           | 1 |
| 17497 | chr4  | + | 135419643,135423040,135419643           | 135421733,135425814,135421733           | 2 |
| 17503 | chr4  | + | 135519644,135522284                     | 135519703,135522461                     | 1 |

|       |       |   |                                         |                                         |   |
|-------|-------|---|-----------------------------------------|-----------------------------------------|---|
|       | chr4  | + | 135521480,135523503                     | 135521596,135523618                     | 1 |
| 17517 | chr4  | - | 136113556,136110127                     | 136113668,136110315                     | 1 |
|       | chr4  | - | 136137954,136110127                     | 136138014,136110315                     | 2 |
|       | chr4  | - | 136158146,136126372                     | 136158625,136126454                     | 1 |
| 17528 | chr4  | - | 136884929,136884627,136883340,136877889 | 136885039,136884825,136883451,136878534 | 3 |
| 17531 | chr4  | + | 137097322,137099438                     | 137097468,137099568                     | 1 |
| 17534 | chr4  | + | 137169596,137206207                     | 137169776,137206333                     | 1 |
|       | chr4  | + | 137190812,137193674,137194070           | 137190923,137193805,137194177           | 1 |
| 17535 | chr4  | + | 137279660,137276208                     | 137279738,137276346                     | 3 |
| 17539 | chr4  | + | 137652666,137759259                     | 137652846,137759406                     | 1 |
|       | chr4  | + | 137661228,137702199                     | 137661351,137702288                     | 1 |
|       | chr4  | + | 137702199,137728487                     | 137702288,137728592                     | 1 |
|       | chr4  | + | 137707496,137753993                     | 137707743,137754140                     | 1 |
|       | chr4  | + | 137747881,137743960                     | 137747963,137746048                     | 1 |
|       | chr4  | + | 137759259,137761887,137651823,137757835 | 137759406,137762386,137651844,137757917 | 1 |
| 17543 | chr4  | + | 137809745,137814083                     | 137809873,137814243                     | 1 |
| 17544 | chr4  | + | 137865264,137866517                     | 137865368,137866666                     | 2 |
|       | chr4  | + | 137866098,137866755                     | 137866192,137866903                     | 2 |
|       | chr4  | + | 137866098,137867748                     | 137866192,137868526                     | 4 |
| 17545 | chr4  | - | 137881747,137871918                     | 137882211,137872046                     | 1 |
| 17564 | chr4  | + | 138835910,138843670                     | 138836052,138843747                     | 1 |
|       | chr4  | + | 138843670,138846917                     | 138843758,138847727                     | 6 |
|       | chr4  | + | 138846917,138843670                     | 138847727,138843758                     | 2 |
| 17566 | chr4  | + | 138870381,138873484                     | 138870486,138873614                     | 1 |
|       | chr4  | + | 138870381,138874006                     | 138870486,138874340                     | 1 |
| 17568 | chr4  | + | 139004736,139019412                     | 139004886,139019570                     | 1 |
|       | chr4  | + | 139009049,139045081                     | 139009194,139045447                     | 1 |
|       | chr4  | + | 139028985,139035364                     | 139029159,139035490                     | 1 |
| 17577 | chr4  | - | 139590265,139590265,139583963           | 139590740,139590740,139584156           | 1 |
|       | chr4  | - | 139802216,139590265                     | 139802699,139590740                     | 1 |
| 17578 | chr4  | - | 140118628,140070399                     | 140118729,140071446                     | 1 |
| 17580 | chr4  | + | 140258061,140271780                     | 140258350,140271947                     | 1 |
| 17587 | chr4  | + | 140517185,140533292                     | 140517391,140533415                     | 6 |
|       | chr4  | + | 140528797,140534939                     | 140528934,140535107                     | 2 |
|       | chr4  | + | 140534939,140517185,140533292           | 140535107,140517391,140533415           | 2 |
| 17588 | chr4  | + | 140548252,140549862                     | 140548435,140549977                     | 1 |
|       | chr4  | + | 140551472,140552582                     | 140551542,140554077                     | 1 |
|       | chr4  | + | 140552582,140560916                     | 140554077,140561069                     | 1 |
|       | chr4  | + | 140556599,140559065                     | 140556788,140559190                     | 1 |
|       | chr4  | + | 140560096,140562667                     | 140560201,140562763                     | 1 |
|       | chr4  | + | 140561180,140562667                     | 140561277,140562763                     | 1 |
| 17589 | chr4  | + | 140570103,140571129                     | 140570184,140571203                     | 1 |
| 17590 | chr4  | - | 140575077,140574164                     | 140575227,140574296                     | 1 |
|       | chr4  | - | 140602306,140572556                     | 140602472,140573047                     | 1 |
| 175   | chr1  | + | 38078438,38094047                       | 38078656,38094155                       | 1 |
| 17617 | chr4  | + | 141363029,141369509                     | 141364925,141371890                     | 1 |
| 1761  | chr10 | - | 61752907,61732609                       | 61753141,61732804                       | 2 |
|       | chr10 | - | 61758450,61737194                       | 61758634,61737350                       | 3 |
|       | chr10 | - | 61767467,61747026                       | 61767616,61747146                       | 1 |
|       | chr10 | - | 61842562,61778133                       | 61842631,61778296                       | 1 |
| 17688 | chr4  | - | 147239297,147237005                     | 147239379,147237058                     | 1 |
| 17699 | chr4  | + | 147513951,147514598                     | 147514129,147514943                     | 4 |
| 176   | chr1  | - | 38165248,38113108                       | 38165312,38113311                       | 4 |
| 17705 | chr4  | + | 147904590,147930375                     | 147904716,147930481                     | 1 |
|       | chr4  | + | 147924196,147844330,147923476           | 147924332,147844465,147923549           | 1 |
| 17707 | chr4  | + | 147932566,147956392                     | 147932687,147956506                     | 1 |
|       | chr4  | + | 147940387,147947219                     | 147940544,147947298                     | 1 |
| 17709 | chr4  | + | 147978364,147980137,147977795           | 147978522,147980285,147977927           | 1 |
| 17715 | chr4  | - | 148473880,148340330                     | 148473921,148340428                     | 1 |
| 17726 | chr4  | + | 148860860,148867840                     | 148860969,148867922                     | 1 |
| 17729 | chr4  | - | 149075611,149047547                     | 149075706,149048070                     | 1 |
| 17743 | chr4  | - | 150271250,150281148,150275116           | 150271580,150281250,150275203           | 2 |
|       | chr4  | - | 150281148,150271250                     | 150281250,150271580                     | 1 |
|       | chr4  | - | 150283891,150275116                     | 150283959,150275203                     | 1 |
| 17757 | chr4  | + | 151461753,151482289                     | 151461830,151482439                     | 1 |
| 17761 | chr4  | + | 151591844,151634954                     | 151592001,151635139                     | 2 |

|       |      |   |                                         |                                         |   |
|-------|------|---|-----------------------------------------|-----------------------------------------|---|
|       | chr4 | + | 151597179,151603883,151611788,151634954 | 151597271,151603998,151611875,151635139 | 1 |
|       | chr4 | + | 151597179,151645582                     | 151597271,151645956                     | 3 |
| 17765 | chr4 | - | 151687295,151688144,151687472           | 151687393,151688217,151687541           | 1 |
|       | chr4 | - | 151691769,151685880                     | 151691902,151685932                     | 1 |
| 17768 | chr4 | - | 151775056,151768398                     | 151775143,151768519                     | 1 |
| 17781 | chr4 | + | 153526669,153529349                     | 153526804,153529475                     | 1 |
| 17794 | chr4 | - | 154273051,154272236                     | 154273152,154272288                     | 1 |
| 17800 | chr4 | - | 154450820,154448220                     | 154450899,154449137                     | 1 |
| 17802 | chr4 | - | 154595660,154534688                     | 154596644,154534804                     | 1 |
| 17810 | chr4 | + | 154914664,154931279                     | 154914728,154931395                     | 1 |
| 17814 | chr4 | + | 155000882,155021591                     | 155000998,155021713                     | 2 |
| 17816 | chr4 | - | 155033231,155030180                     | 155033374,155030414                     | 1 |
| 17818 | chr4 | + | 155089570,155106035                     | 155090787,155106295                     | 1 |
| 17839 | chr4 | + | 155374778,155383252                     | 155374892,155383428                     | 2 |
| 17844 | chr4 | - | 155553501,155552891                     | 155553717,155553116                     | 1 |
| 17861 | chr5 | + | 3807298,3811255                         | 3807458,3811385                         | 1 |
|       | chr5 | + | 3823633,3836777                         | 3823785,3836894                         | 1 |
| 17864 | chr5 | + | 3954791,4065804                         | 3954962,4065910                         | 1 |
|       | chr5 | + | 3956156,3951689                         | 3956312,3954765                         | 1 |
|       | chr5 | + | 3975598,4029839                         | 3975710,4030052                         | 1 |
|       | chr5 | + | 3992045,4044798                         | 3992138,4044978                         | 1 |
|       | chr5 | + | 4001404,3976127,4001404                 | 4001758,3976326,4001758                 | 5 |
| 17883 | chr5 | - | 8367200,8117588                         | 8367361,8117757                         | 1 |
| 17920 | chr5 | + | 15818318,15825055                       | 15818397,15825130                       | 1 |
|       | chr5 | + | 15832129,15868082                       | 15832201,15868212                       | 1 |
| 17944 | chr5 | + | 21252795,21262219                       | 21252939,21262305                       | 2 |
| 17945 | chr5 | - | 21274463,21272373,21269558              | 21274555,21272523,21269647              | 1 |
| 17948 | chr5 | - | 21515933,21402564                       | 21516120,21402762                       | 1 |
|       | chr5 | - | 21633890,21402564                       | 21634484,21402762                       | 1 |
| 17949 | chr5 | - | 22032352,22022521                       | 22032401,22022632                       | 2 |
| 17953 | chr5 | + | 22970520,22992119                       | 22970750,22992218                       | 1 |
|       | chr5 | + | 22972925,22982303                       | 22973006,22982342                       | 1 |
|       | chr5 | + | 22979298,23002221                       | 22979471,23002366                       | 1 |
| 17954 | chr5 | - | 23031313,23019769                       | 23031563,23019862                       | 1 |
|       | chr5 | - | 23054272,23031313                       | 23054381,23031563                       | 1 |
|       | chr5 | - | 23181675,23046192                       | 23181786,23046299                       | 1 |
| 17971 | chr5 | - | 23926310,23924059                       | 23926407,23925280                       | 1 |
|       | chr5 | - | 23928615,23925417                       | 23928704,23925498                       | 1 |
| 17972 | chr5 | + | 23940650,23944512                       | 23940835,23944767                       | 1 |
| 17973 | chr5 | - | 23947153,23946857                       | 23947283,23947079                       | 6 |
| 17975 | chr5 | + | 23983827,23993606                       | 23983955,23993711                       | 1 |
| 17980 | chr5 | + | 24100288,24099435                       | 24100363,24100213                       | 2 |
| 17981 | chr5 | - | 24099454,24098439                       | 24099590,24098622                       | 4 |
|       | chr5 | - | 24100649,24099042                       | 24100811,24099165                       | 1 |
|       | chr5 | - | 24100960,24099042                       | 24101062,24099165                       | 4 |
| 17982 | chr5 | + | 24195197,24212255                       | 24195328,24212402                       | 1 |
|       | chr5 | + | 24201337,24214500                       | 24201408,24214678                       | 2 |
| 17985 | chr5 | - | 24313565,24308640                       | 24313622,24309574                       | 5 |
|       | chr5 | - | 24314170,24312816                       | 24314253,24312898                       | 1 |
|       | chr5 | - | 24323577,24313422                       | 24323649,24313470                       | 2 |
| 17986 | chr5 | - | 24380978,24371896                       | 24381033,24371990                       | 1 |
| 17992 | chr5 | - | 24850725,24836613                       | 24850856,24836718                       | 1 |
|       | chr5 | - | 24856869,24810495                       | 24857082,24810559                       | 1 |
| 18002 | chr5 | - | 28088116,28077502                       | 28088212,28077671                       | 1 |
| 18023 | chr5 | - | 30450147,30448689                       | 30450234,30448758                       | 1 |
|       | chr5 | - | 30458779,30444843                       | 30458836,30446500                       | 2 |
| 18037 | chr5 | + | 31165576,31167187                       | 31165778,31167340                       | 1 |
| 18038 | chr5 | + | 31174873,31175059                       | 31174979,31175277                       | 3 |
|       | chr5 | + | 31175059,31174873                       | 31175277,31174979                       | 6 |
| 18039 | chr5 | + | 31192492,31198138                       | 31192753,31199060                       | 1 |
| 18045 | chr5 | - | 31260260,31257420,31257420              | 31260434,31258110,31258110              | 1 |
|       | chr5 | - | 31260260,31258302,31257420              | 31260434,31258462,31258110              | 3 |
| 18048 | chr5 | + | 31351834,31355135,31356333,31356635     | 31351953,31355257,31356431,31356996     | 1 |
|       | chr5 | + | 31351834,31356635                       | 31351856,31356996                       | 1 |
| 18049 | chr5 | + | 31364150,31379967                       | 31364339,31380069                       | 1 |
| 18054 | chr5 | - | 31443320,31447867,31447072              | 31444223,31447963,31447125              | 5 |



|       |       |   |                                     |                                     |    |
|-------|-------|---|-------------------------------------|-------------------------------------|----|
|       | chr5  | - | 31475066,31460715                   | 31475434,31460868                   | 1  |
|       | chr5  | - | 31475755,31468733                   | 31475884,31468759                   | 1  |
| 18055 | chr5  | - | 31493209,31492731                   | 31493324,31492834                   | 1  |
|       | chr5  | - | 31493737,31492954                   | 31493820,31493031                   | 2  |
|       | chr5  | - | 31493913,31493521                   | 31494120,31493613                   | 1  |
| 18056 | chr5  | + | 31498323,31500608                   | 31498414,31500650                   | 1  |
|       | chr5  | + | 31498549,31499542                   | 31498637,31499746                   | 1  |
| 18058 | chr5  | - | 31506825,31505944                   | 31507060,31506047                   | 1  |
|       | chr5  | - | 31507370,31505040                   | 31507502,31505657                   | 1  |
|       | chr5  | - | 31522675,31510385                   | 31522918,31510471                   | 1  |
| 18059 | chr5  | + | 31543290,31550056                   | 31543375,31550115                   | 1  |
|       | chr5  | + | 31552261,31553053                   | 31552367,31553117                   | 1  |
| 18060 | chr5  | + | 31554737,31555466                   | 31554944,31555570                   | 1  |
| 18062 | chr5  | - | 31597585,31596058                   | 31597730,31596186                   | 1  |
| 18064 | chr5  | + | 31767818,31768604,31754862,31767818 | 31768006,31768709,31754950,31768006 | 3  |
| 18066 | chr5  | + | 31797133,31801639                   | 31797256,31801677                   | 1  |
| 1806  | chr10 | - | 62226187,62210091                   | 62226271,62210212                   | 1  |
|       | chr10 | - | 62228014,62226187,62222841          | 62228181,62226271,62223027          | 10 |
| 18070 | chr5  | + | 31918753,31956840                   | 31918860,31957024                   | 1  |
|       | chr5  | + | 31924749,31924749,31952675          | 31925014,31925014,31952857          | 1  |
| 18071 | chr5  | - | 31968091,31954181,31950093          | 31968154,31954273,31950282          | 5  |
| 18073 | chr5  | + | 32004198,32133457                   | 32004350,32133589                   | 1  |
|       | chr5  | + | 32122850,32307082                   | 32123045,32307153                   | 1  |
| 18076 | chr5  | + | 32611536,32655998                   | 32611588,32656077                   | 1  |
| 18082 | chr5  | - | 33196741,33186692                   | 33196879,33187213                   | 1  |
| 18083 | chr5  | + | 33210622,33287571                   | 33210710,33287791                   | 1  |
|       | chr5  | + | 33244478,33333390                   | 33244553,33333473                   | 1  |
| 18088 | chr5  | + | 33703000,33713079                   | 33703204,33713223                   | 1  |
| 18096 | chr5  | - | 34105107,34084000                   | 34105251,34085261                   | 2  |
|       | chr5  | - | 34105107,34086290                   | 34105251,34086429                   | 1  |
| 18099 | chr5  | + | 34326122,34326700                   | 34326213,34326789                   | 1  |
| 18107 | chr5  | + | 34801646,34818374                   | 34801937,34818456                   | 1  |
|       | chr5  | + | 34801646,34828302                   | 34801937,34829105                   | 1  |
| 18110 | chr5  | + | 34956167,34971063                   | 34956266,34971162                   | 1  |
|       | chr5  | + | 34961998,34971784                   | 34962100,34971821                   | 1  |
| 18111 | chr5  | - | 34978018,34977071                   | 34978180,34977162                   | 1  |
| 18112 | chr5  | - | 35000523,34994944                   | 35000658,34995067                   | 1  |
| 18115 | chr5  | + | 35258563,35265972,35265972          | 35260564,35266488,35266488          | 1  |
| 18116 | chr5  | + | 35307421,35363764                   | 35309404,35363908                   | 1  |
|       | chr5  | + | 35361991,35365240                   | 35362743,35365420                   | 4  |
| 1812  | chr10 | - | 62480271,62478549                   | 62480358,62478642                   | 1  |
|       | chr10 | - | 62485292,62482140                   | 62486586,62482275                   | 4  |
| 18130 | chr5  | + | 36174334,36185816                   | 36174391,36185915                   | 1  |
| 18141 | chr5  | - | 37219102,37198159                   | 37219208,37198449                   | 1  |
| 18144 | chr5  | + | 37476474,37514518                   | 37476737,37514581                   | 1  |
|       | chr5  | + | 37496051,37516115                   | 37496198,37516534                   | 1  |
| 18146 | chr5  | + | 37656470,37682355                   | 37656559,37683372                   | 2  |
|       | chr5  | + | 37659921,37677606                   | 37660106,37677786                   | 2  |
|       | chr5  | + | 37670897,37680043                   | 37671018,37680209                   | 1  |
| 18149 | chr5  | - | 37922783,37846173                   | 37922957,37846238                   | 1  |
| 18168 | chr5  | - | 42219991,42217701                   | 42220158,42217840                   | 1  |
|       | chr5  | - | 42229278,42219991                   | 42229403,42220158                   | 1  |
| 18174 | chr5  | + | 44097295,44105747                   | 44097473,44105840                   | 1  |
| 18180 | chr5  | - | 44584425,44573936                   | 44584561,44574013                   | 1  |
| 18190 | chr5  | + | 45913674,45916391,45911490          | 45913741,45916624,45911723          | 1  |
|       | chr5  | + | 45913674,45916391,45916391          | 45913741,45916624,45916624          | 1  |
| 18191 | chr5  | - | 45971762,45922996                   | 45971966,45923196                   | 1  |
| 18201 | chr5  | - | 50370598,50351194                   | 50370812,50352753                   | 1  |
| 18207 | chr5  | + | 52581919,52581919,52586039          | 52582176,52582176,52586129          | 1  |
| 18213 | chr5  | + | 53247082,53255717                   | 53247129,53255891                   | 1  |
|       | chr5  | + | 53247082,53257132                   | 53247129,53257256                   | 2  |
| 18221 | chr5  | + | 54229162,54248086                   | 54229209,54248161                   | 1  |
| 18234 | chr5  | + | 64654707,64730800                   | 64654818,64730970                   | 3  |
| 18244 | chr5  | - | 65676087,65657340                   | 65676192,65657554                   | 1  |
|       | chr5  | - | 65687192,65653096                   | 65687283,65654385                   | 1  |
|       | chr5  | - | 65710643,65670695                   | 65710769,65671053                   | 1  |

|       |      |   |                                     |                                     |    |
|-------|------|---|-------------------------------------|-------------------------------------|----|
| 18249 | chr5 | - | 65851762,65839993                   | 65851811,65841676                   | 1  |
| 18250 | chr5 | + | 65928515,65985658                   | 65928697,65985787                   | 4  |
| 18251 | chr5 | - | 66050845,66043626                   | 66050972,66043772                   | 2  |
|       | chr5 | - | 66088988,66019237                   | 66089095,66019361                   | 1  |
| 18264 | chr5 | + | 67067526,67073680                   | 67067561,67073766                   | 1  |
|       | chr5 | + | 67067526,67073847                   | 67067561,67073895                   | 3  |
| 18265 | chr5 | + | 67389885,67393666                   | 67390043,67393888                   | 1  |
| 18268 | chr5 | + | 67724292,67743890                   | 67724360,67744004                   | 1  |
|       | chr5 | + | 67741020,67745770                   | 67741150,67747384                   | 1  |
| 18286 | chr5 | + | 72092043,72421065,72091254          | 72092111,72421148,72091334          | 1  |
| 18304 | chr5 | + | 73697816,73704681                   | 73700604,73705323                   | 2  |
|       | chr5 | + | 73704681,73697816                   | 73705323,73700604                   | 28 |
| 18316 | chr5 | + | 74936956,74967123                   | 74937014,74967217                   | 1  |
| 18317 | chr5 | - | 75098816,75002061                   | 75098911,75002287                   | 2  |
| 18325 | chr5 | - | 76352988,76332863                   | 76353135,76332963                   | 1  |
|       | chr5 | - | 76355141,76344775                   | 76355483,76344929                   | 1  |
| 18347 | chr5 | + | 77764658,77778104                   | 77764857,77778349                   | 1  |
| 18348 | chr5 | - | 77836564,77780937                   | 77837066,77781054                   | 1  |
| 18351 | chr5 | + | 81626590,82077653                   | 81626656,82077757                   | 1  |
|       | chr5 | + | 82123475,82187010                   | 82123652,82187037                   | 1  |
| 18355 | chr5 | - | 84546585,84510091                   | 84546651,84510241                   | 1  |
|       | chr5 | - | 84845343,84510091                   | 84846407,84510241                   | 1  |
| 18356 | chr5 | - | 86464440,86442444                   | 86464614,86442535                   | 1  |
| 18358 | chr5 | - | 86588228,86548357                   | 86588340,86548445                   | 1  |
| 18382 | chr5 | + | 88206467,88214311                   | 88206494,88214338                   | 2  |
| 18399 | chr5 | + | 89027460,89064216                   | 89027514,89064300                   | 1  |
|       | chr5 | + | 89057049,89061463                   | 89057115,89061556                   | 1  |
|       | chr5 | + | 89064216,89074561                   | 89064300,89074626                   | 2  |
|       | chr5 | + | 89066216,89076243                   | 89066384,89076271                   | 2  |
| 18400 | chr5 | - | 89092144,89088261,89093088          | 89092280,89089484,89093210          | 1  |
|       | chr5 | - | 89104782,89093088                   | 89105196,89093210                   | 1  |
| 18404 | chr5 | + | 89558663,89608677                   | 89558751,89608869                   | 1  |
|       | chr5 | + | 89657850,89661788,89661788,89664531 | 89658012,89661885,89661885,89668681 | 5  |
| 18409 | chr5 | - | 90652640,90643752                   | 90652989,90644200                   | 1  |
| 18410 | chr5 | - | 90656190,90661265,90656190          | 90658366,90661444,90658366          | 1  |
|       | chr5 | - | 90656190,90662925,90656190          | 90658366,90663174,90658366          | 1  |
|       | chr5 | - | 90711875,90692283                   | 90712628,90692446                   | 2  |
| 18434 | chr5 | - | 92471824,92435100                   | 92472044,92437160                   | 1  |
| 18451 | chr5 | + | 93600364,93600364,93605065          | 93603984,93603984,93605463          | 13 |
| 18471 | chr5 | + | 96652789,96660699                   | 96653051,96660811                   | 3  |
| 18473 | chr5 | + | 97245359,97267311                   | 97245473,97267434                   | 2  |
|       | chr5 | + | 97274519,97263793,97274519          | 97274987,97263852,97274987          | 1  |
| 18492 | chr5 | - | 100393688,100391533,100384954       | 100393820,100391631,100390352       | 1  |
|       | chr5 | - | 100396237,100393688                 | 100396406,100393820                 | 4  |
| 18497 | chr5 | - | 100802398,100797312,100794749       | 100802734,100797371,100795013       | 1  |
|       | chr5 | - | 100802398,100797312,100802398       | 100802734,100797371,100802734       | 1  |
|       | chr5 | - | 100802443,100797312,100794749       | 100802503,100797371,100795013       | 5  |
|       | chr5 | - | 100804226,100792395                 | 100804350,100792467                 | 1  |
| 18517 | chr5 | - | 102386402,102292795                 | 102386564,102292915                 | 1  |
| 18529 | chr5 | - | 104526727,104518618                 | 104526792,104518737                 | 1  |
| 18556 | chr5 | - | 106986757,106929912,106986757       | 106987075,106930314,106987075       | 2  |
| 18558 | chr5 | - | 107333764,107331940                 | 107333835,107333377                 | 1  |
| 18566 | chr5 | - | 108007469,107978042                 | 108007586,107978194                 | 2  |
| 18577 | chr5 | + | 108502325,108528137                 | 108502473,108528205                 | 1  |
|       | chr5 | + | 108509843,108502325                 | 108510042,108502473                 | 1  |
|       | chr5 | + | 108509843,108533444                 | 108510042,108533549                 | 2  |
| 18578 | chr5 | - | 108550665,108559036,108550665       | 108553778,108559134,108553778       | 1  |
| 18582 | chr5 | + | 108798876,108798374                 | 108799626,108798697                 | 2  |
| 18618 | chr5 | + | 110646829,110650642                 | 110646962,110650806                 | 1  |
| 18622 | chr5 | + | 110735345,110747244                 | 110735503,110747454                 | 1  |
| 18627 | chr5 | + | 111006458,111046856                 | 111006639,111046952                 | 1  |
| 18630 | chr5 | - | 111136947,111108982                 | 111137084,111109039                 | 1  |
|       | chr5 | - | 111158252,111148105                 | 111158331,111148283                 | 1  |
| 18633 | chr5 | - | 111225345,111222833                 | 111225519,111222922                 | 1  |
| 18638 | chr5 | + | 111705180,111714011                 | 111705360,111716442                 | 1  |
| 18647 | chr5 | + | 112688276,112696334                 | 112688395,112696477                 | 1  |

|       |       |   |                                         |                                         |    |
|-------|-------|---|-----------------------------------------|-----------------------------------------|----|
| 18649 | chr5  | + | 112756981,112760110                     | 112757202,112760238                     | 1  |
| 1865  | chr10 | + | 68711518,68742092                       | 68711720,68742243                       | 1  |
| 18663 | chr5  | - | 113507402,113504858,113504858           | 113507535,113505091,113505091           | 1  |
| 1866  | chr10 | - | 68812843,68805287                       | 68812906,68805458                       | 1  |
| 1868  | chr10 | + | 69271163,69333749                       | 69271265,69333947                       | 1  |
|       | chr10 | + | 69271620,69284955                       | 69271719,69285141                       | 1  |
|       | chr10 | + | 69452682,69457119,69460842,69462102     | 69455223,69457194,69460974,69462246     | 1  |
| 1876  | chr10 | - | 70423882,70409552                       | 70423962,70409749                       | 1  |
| 18775 | chr5  | + | 114227841,114226779                     | 114228291,114227807                     | 4  |
| 18784 | chr5  | - | 114577534,114573942                     | 114577778,114574263                     | 1  |
| 18865 | chr5  | + | 115395794,115397690                     | 115395837,115398549                     | 2  |
| 18872 | chr5  | - | 115636020,115623123                     | 115636130,115623233                     | 2  |
| 18873 | chr5  | + | 115690481,115690647,115687832,115690170 | 115690565,115690979,115688078,115690320 | 1  |
| 18874 | chr5  | - | 115697177,115692401                     | 115697295,115692560                     | 1  |
|       | chr5  | - | 115697177,115692642                     | 115697295,115692700                     | 1  |
|       | chr5  | - | 115698590,115696888                     | 115698724,115696990                     | 1  |
|       | chr5  | - | 115698703,115695857                     | 115698718,115696013                     | 1  |
|       | chr5  | - | 115699405,115697177                     | 115699531,115697295                     | 2  |
|       | chr5  | - | 115701285,115692642                     | 115701470,115692700                     | 1  |
|       | chr5  | - | 115705358,115701074                     | 115705449,115701211                     | 1  |
|       | chr5  | - | 115722265,115692401                     | 115722903,115692560                     | 4  |
|       | chr5  | - | 115722265,115701285                     | 115722903,115701470                     | 1  |
| 18877 | chr5  | + | 115777185,115782125                     | 115777508,115782298                     | 1  |
|       | chr5  | + | 115782584,115777185,115782125           | 115783089,115777508,115782298           | 2  |
| 18886 | chr5  | + | 116037984,116045301                     | 116038144,116045445                     | 1  |
|       | chr5  | + | 116060030,116066642                     | 116060173,116066757                     | 1  |
| 18888 | chr5  | + | 116087724,116093583                     | 116087775,116093708                     | 1  |
| 18889 | chr5  | - | 116101827,116110214                     | 116101948,116111527                     | 1  |
|       | chr5  | - | 116102933,116102635                     | 116102987,116102821                     | 1  |
|       | chr5  | - | 116105909,116110214                     | 116106040,116111527                     | 11 |
| 18891 | chr5  | + | 116325897,116391845                     | 116325988,116391941                     | 1  |
|       | chr5  | + | 116435413,116438164                     | 116435594,116438245                     | 1  |
| 18892 | chr5  | - | 116474099,116463598                     | 116474437,116464735                     | 1  |
| 1889  | chr10 | + | 74093255,74105026                       | 74097510,74105135                       | 1  |
|       | chr10 | + | 74108265,74089431                       | 74109059,74089587                       | 1  |
| 188   | chr1  | - | 39617537,39612322                       | 39617620,39612515                       | 1  |
| 18900 | chr5  | + | 117635535,117722105                     | 117635620,117722288                     | 1  |
| 1893  | chr10 | + | 74617642,74623074                       | 74617811,74623149                       | 1  |
| 18947 | chr5  | - | 121458992,121413832,121412407,121411234 | 121459108,121413962,121412494,121411400 | 1  |
| 18951 | chr5  | + | 121756009,121768571                     | 121756114,121768774                     | 1  |
|       | chr5  | + | 121761631,121771406                     | 121761816,121771589                     | 1  |
| 18954 | chr5  | - | 121829554,121825024                     | 121829690,121825255                     | 1  |
|       | chr5  | - | 121834048,121825804                     | 121834113,121825881                     | 1  |
| 18955 | chr5  | + | 121871299,121881468                     | 121871412,121881594                     | 1  |
| 18960 | chr5  | - | 121978878,121975671                     | 121978999,121975776                     | 1  |
|       | chr5  | - | 121995173,121981541                     | 121995901,121981729                     | 1  |
| 18961 | chr5  | - | 122030622,122017695                     | 122030727,122018032                     | 2  |
| 18965 | chr5  | + | 122260859,122261393,122261393,122264346 | 122261005,122261621,122261621,122264959 | 2  |
|       | chr5  | + | 122260859,122261393,122264346           | 122261005,122261621,122264959           | 1  |
|       | chr5  | + | 122261393,122261393,122264346           | 122261621,122261621,122264959           | 2  |
|       | chr5  | + | 122261393,122264346                     | 122261621,122264959                     | 1  |
|       | chr5  | + | 122261393,122264346,122264346           | 122261621,122264959,122264959           | 7  |
| 18978 | chr5  | - | 122820523,122814592                     | 122820582,122814928                     | 1  |
| 18980 | chr5  | + | 122841936,122855092                     | 122842006,122855187                     | 3  |
| 18981 | chr5  | + | 122879494,122890094                     | 122879614,122890319                     | 1  |
| 18982 | chr5  | - | 122903522,122910649,122903522           | 122904313,122910985,122904313           | 2  |
|       | chr5  | - | 122910649,122903522,122903522           | 122910985,122904313,122904313           | 3  |
| 18987 | chr5  | - | 123187441,123183206,123195716,123192108 | 123187542,123184254,123195770,123192237 | 1  |
|       | chr5  | - | 123229260,123194066                     | 123229408,123194140                     | 1  |
| 19009 | chr5  | - | 123961324,123965827                     | 123962716,123968074                     | 3  |
| 19011 | chr5  | - | 124053607,124030008,124029078           | 124053728,124030133,124029511           | 1  |
|       | chr5  | - | 124053607,124030008                     | 124053728,124030133                     | 1  |
|       | chr5  | - | 124080461,124073221                     | 124081178,124073279                     | 1  |
|       | chr5  | - | 124085182,124029078                     | 124085287,124029511                     | 1  |
|       | chr5  | - | 124116660,124059247                     | 124116699,124059354                     | 2  |
| 19013 | chr5  | - | 124196780,124181045,124181045           | 124196879,124181278,124181278           | 1  |

|       |      |   |                                         |                                         |   |
|-------|------|---|-----------------------------------------|-----------------------------------------|---|
| 19014 | chr5 | + | 124237515,124247622                     | 124237613,124247827                     | 1 |
|       | chr5 | + | 124252060,124268459                     | 124252119,124268549                     | 1 |
| 19017 | chr5 | + | 124365199,124374739                     | 124365219,124374856                     | 1 |
|       | chr5 | + | 124372188,124377258                     | 124372272,124378841                     | 1 |
| 19018 | chr5 | + | 124450148,124451639                     | 124450259,124451701                     | 1 |
| 19023 | chr5 | - | 124577185,124575225                     | 124577356,124575472                     | 1 |
| 19027 | chr5 | - | 124850716,124842847                     | 124850870,124843015                     | 1 |
|       | chr5 | - | 124864407,124850970                     | 124864536,124851076                     | 1 |
| 19033 | chr5 | + | 125004679,125018564                     | 125004766,125018947                     | 1 |
|       | chr5 | + | 125012598,125009136,125011914           | 125012691,125009326,125012046           | 5 |
|       | chr5 | + | 125012598,125016842                     | 125012691,125017011                     | 1 |
| 19036 | chr5 | + | 125049715,125075905                     | 125049792,125075994                     | 1 |
| 19044 | chr5 | - | 125514353,125499180                     | 125514434,125499360                     | 1 |
|       | chr5 | - | 125517643,125517431                     | 125517746,125517536                     | 1 |
|       | chr5 | - | 125518230,125512384                     | 125518367,125512739                     | 1 |
|       | chr5 | - | 125590262,125568163                     | 125590442,125568336                     | 1 |
| 19045 | chr5 | - | 125779002,125757459                     | 125779098,125758235                     | 1 |
| 19047 | chr5 | - | 125907020,125903796                     | 125907134,125903941                     | 1 |
| 19065 | chr5 | - | 129343537,129279211                     | 129343652,129279380                     | 1 |
| 19069 | chr5 | + | 130066554,130076350                     | 130066680,130076423                     | 2 |
| 19073 | chr5 | + | 130223790,130221402,130222601           | 130224566,130221424,130222741           | 2 |
| 19076 | chr5 | + | 130293260,130299511                     | 130293451,130299608                     | 3 |
|       | chr5 | + | 130296459,130321458                     | 130296563,130321531                     | 1 |
|       | chr5 | + | 130297345,130321458                     | 130297456,130321531                     | 1 |
|       | chr5 | + | 130297658,130320845,130321623           | 130297818,130320948,130322231           | 3 |
|       | chr5 | + | 130300227,130321623                     | 130300374,130322231                     | 1 |
| 19085 | chr5 | - | 130487734,130487372,130488866,130487919 | 130487841,130487570,130488926,130488000 | 2 |
| 19087 | chr5 | + | 130510781,130518075                     | 130510818,130518170                     | 1 |
| 19097 | chr5 | - | 131952422,131937151                     | 131952571,131937223                     | 1 |
| 19105 | chr5 | - | 134716112,134713703,134713703           | 134716154,134714762,134714762           | 1 |
|       | chr5 | - | 134727735,134718473                     | 134727807,134718657                     | 1 |
|       | chr5 | - | 134737712,134727735                     | 134737771,134727807                     | 1 |
| 19109 | chr5 | + | 135070078,135072751                     | 135070144,135072865                     | 1 |
| 19112 | chr5 | - | 135146187,135133778                     | 135146394,135133834                     | 1 |
| 19113 | chr5 | - | 135181610,135178465                     | 135181655,135179694                     | 1 |
|       | chr5 | - | 135186931,135182435                     | 135187090,135182474                     | 1 |
|       | chr5 | - | 135194858,135183379                     | 135194918,135183520                     | 3 |
| 19122 | chr5 | + | 135499441,135525696                     | 135499480,135526969                     | 1 |
|       | chr5 | + | 135517800,135524863                     | 135517874,135524974                     | 1 |
| 19139 | chr5 | + | 136165083,136209642                     | 136165122,136209792                     | 1 |
| 19142 | chr5 | + | 136259174,136263410                     | 136259343,136263488                     | 1 |
| 19143 | chr5 | + | 136328052,136331738                     | 136328181,136331789                     | 2 |
| 19159 | chr5 | - | 136845987,136732669                     | 136846111,136732736                     | 1 |
| 19164 | chr5 | + | 137437957,137441434                     | 137438098,137441540                     | 5 |
| 19166 | chr5 | - | 137460748,137458737,137463358,137462680 | 137460919,137458817,137463752,137462720 | 1 |
| 19169 | chr5 | + | 137518933,137510863                     | 137519112,137511661                     | 1 |
| 19173 | chr5 | + | 137729504,137735344                     | 137729595,137735691                     | 1 |
| 19175 | chr5 | - | 137737214,137737058,137739026,137737445 | 137737320,137737134,137739215,137737547 | 1 |
|       | chr5 | - | 137738567,137737694                     | 137738741,137737851                     | 1 |
|       | chr5 | - | 137739618,137737058                     | 137739680,137737134                     | 1 |
|       | chr5 | - | 137741471,137737214                     | 137741641,137737341                     | 3 |
| 19179 | chr5 | - | 137905848,137823533                     | 137905868,137823733                     | 1 |
| 19182 | chr5 | + | 137960964,137966399                     | 137961073,137966587                     | 1 |
| 19184 | chr5 | - | 137970231,137969356                     | 137970433,137969837                     | 5 |
|       | chr5 | - | 137970830,137970231                     | 137970993,137970433                     | 1 |
|       | chr5 | - | 137974366,137971073                     | 137974457,137971137                     | 1 |
| 19185 | chr5 | + | 137994782,137995740,137996223           | 137994887,137995906,137996324           | 3 |
|       | chr5 | + | 137995291,138005880                     | 137995368,138005987                     | 2 |
|       | chr5 | + | 138005880,138008024                     | 138005987,138008105                     | 2 |
|       | chr5 | + | 138007204,138008024,138005880           | 138007266,138008105,138005987           | 5 |
|       | chr5 | + | 138007204,138008024,138008200           | 138007266,138008105,138008296           | 1 |
|       | chr5 | + | 138007757,138008200                     | 138007872,138008296                     | 1 |
|       | chr5 | + | 138008200,138010533                     | 138008296,138010801                     | 1 |
|       | chr5 | + | 138008484,138007204,138008024           | 138008571,138007266,138008105           | 1 |
| 19187 | chr5 | - | 138041969,138041498                     | 138042268,138041936                     | 1 |
| 19196 | chr5 | - | 138174943,138174121                     | 138175153,138174388                     | 4 |

|       |      |   |                                     |                                     |     |
|-------|------|---|-------------------------------------|-------------------------------------|-----|
| 19198 | chr5 | + | 138220529,138221081,138220529       | 138220773,138221335,138220773       | 1   |
| 19214 | chr5 | + | 138616171,138619296                 | 138616252,138619408                 | 2   |
| 19215 | chr5 | - | 138628189,138622345                 | 138628390,138622696                 | 1   |
| 19220 | chr5 | - | 138701741,138703029,138702062       | 138701935,138703112,138702217       | 2   |
|       | chr5 | - | 138703397,138700885                 | 138703545,138701622                 | 2   |
| 19223 | chr5 | - | 138716934,138714887                 | 138717074,138715797                 | 1   |
|       | chr5 | - | 138717435,138717811                 | 138717566,138718715                 | 1   |
|       | chr5 | - | 138717811,138717435                 | 138718715,138717566                 | 2   |
| 19231 | chr5 | - | 139539209,139518388                 | 139539271,139518449                 | 1   |
| 19235 | chr5 | - | 139801234,139749288                 | 139801418,139749517                 | 1   |
| 19244 | chr5 | - | 140240621,140227663                 | 140240751,140227773                 | 1   |
|       | chr5 | - | 140251285,140229414                 | 140251607,140229527                 | 1   |
|       | chr5 | - | 140251285,140240181                 | 140251607,140240361                 | 1   |
| 19254 | chr5 | + | 140908877,140918827                 | 140909088,140919312                 | 2   |
|       | chr5 | + | 140914269,140918273                 | 140914348,140918390                 | 2   |
| 19258 | chr5 | - | 141103075,141096593                 | 141103249,141099485                 | 1   |
| 19264 | chr5 | + | 142411997,142687874                 | 142412109,142689148                 | 2   |
| 19269 | chr5 | - | 143084511,143043818                 | 143084706,143043888                 | 1   |
| 19279 | chr5 | + | 143722033,143731845                 | 143722959,143731967                 | 1   |
| 19287 | chr5 | - | 144085905,144083447                 | 144086077,144083573                 | 5   |
|       | chr5 | - | 144085905,144087777                 | 144086077,144087902                 | 1   |
| 19298 | chr5 | + | 144638444,144647718                 | 144638544,144647830                 | 1   |
| 19300 | chr5 | - | 144663572,144667417,144663572       | 144664059,144667624,144664059       | 1   |
| 19303 | chr5 | - | 144752340,144748777                 | 144752499,144749118                 | 1   |
|       | chr5 | - | 144772320,144752340                 | 144772398,144752499                 | 2   |
|       | chr5 | - | 144773862,144751506                 | 144773960,144751634                 | 3   |
| 19307 | chr5 | - | 144964276,144958760                 | 144964379,144958853                 | 1   |
| 19312 | chr5 | - | 145516079,145509525                 | 145516385,145509610                 | 1   |
| 19313 | chr5 | + | 145546337,145552961                 | 145546434,145553156                 | 1   |
|       | chr5 | + | 145566556,145619542                 | 145566678,145620642                 | 1   |
|       | chr5 | + | 145581116,145593774                 | 145581263,145594062                 | 2   |
|       | chr5 | + | 145591774,145593774                 | 145591921,145594062                 | 1   |
| 19317 | chr5 | + | 145844737,145861925                 | 145844841,145862138                 | 1   |
|       | chr5 | + | 145856920,145844737,145853326       | 145857143,145844841,145853431       | 1   |
|       | chr5 | + | 145861925,145867913                 | 145862138,145868004                 | 1   |
| 19319 | chr5 | - | 145893727,145889638                 | 145893849,145891244                 | 2   |
| 19320 | chr5 | + | 145902173,145905767                 | 145902305,145905888                 | 18  |
|       | chr5 | + | 145902173,145907311                 | 145902305,145907478                 | 1   |
|       | chr5 | + | 145905767,145907311                 | 145905888,145907478                 | 142 |
| 19353 | chr5 | - | 148182032,148156069                 | 148182160,148156203                 | 1   |
| 19357 | chr5 | + | 148680298,148687039                 | 148680359,148687354                 | 2   |
|       | chr5 | + | 148680987,148687039                 | 148684639,148687354                 | 2   |
| 19363 | chr5 | - | 149770723,149766541                 | 149771280,149766777                 | 2   |
| 19377 | chr5 | - | 150422451,150423256                 | 150422577,150426171                 | 1   |
| 193   | chr1 | + | 40070950,40081154                   | 40071068,40081294                   | 1   |
| 19468 | chr5 | + | 151097962,151128705                 | 151098259,151128759                 | 1   |
| 19469 | chr5 | + | 151239504,151242060                 | 151239907,151242231                 | 1   |
| 19470 | chr5 | + | 151341223,151350515                 | 151346032,151350585                 | 1   |
| 19493 | chr6 | + | 4477054,4485975                     | 4477153,4486083                     | 1   |
|       | chr6 | + | 4481103,4487172                     | 4481157,4487226                     | 1   |
| 19495 | chr6 | - | 4641428,4638611                     | 4641640,4639767                     | 2   |
| 19519 | chr6 | - | 8041840,7972736                     | 8041909,7972805                     | 1   |
|       | chr6 | - | 8112199,7972219                     | 8112226,7972300                     | 1   |
| 19526 | chr6 | - | 8620693,8580526                     | 8620792,8580797                     | 1   |
| 19529 | chr6 | + | 11912651,11956810                   | 11912789,11956861                   | 1   |
|       | chr6 | + | 11940028,11941985,11937003,11938721 | 11940132,11942117,11937274,11938817 | 1   |
|       | chr6 | + | 12030996,11912651,11997826          | 12031197,11912789,11997944          | 1   |
| 19538 | chr6 | - | 13788278,13788559                   | 13788454,13789179                   | 2   |
|       | chr6 | - | 13788559,13785073,13785073          | 13789179,13787073,13787073          | 4   |
| 19539 | chr6 | - | 13821438,13819073,13819073          | 13821466,13820740,13820740          | 1   |
| 19551 | chr6 | + | 17587097,17606237                   | 17587160,17609609                   | 1   |
|       | chr6 | + | 17600002,17607172                   | 17600054,17607252                   | 2   |
| 19556 | chr6 | - | 18464654,18338027                   | 18464825,18338215                   | 1   |
| 19566 | chr6 | + | 22875829,22999530                   | 22875895,22999673                   | 1   |
|       | chr6 | + | 22979219,23000396                   | 22979354,23000532                   | 1   |
| 19575 | chr6 | - | 24477272,24469191,24468665          | 24477317,24469257,24468824          | 1   |

|       |       |   |                                     |                                     |   |
|-------|-------|---|-------------------------------------|-------------------------------------|---|
| 19590 | chr6  | + | 28373639,28374721                   | 28373755,28374831                   | 2 |
| 19604 | chr6  | + | 29355870,29369101                   | 29356191,29369383                   | 1 |
|       | chr6  | + | 29367071,29376624                   | 29367578,29376953                   | 1 |
|       | chr6  | + | 29369101,29376624                   | 29369383,29376953                   | 5 |
|       | chr6  | + | 29376624,29361247,29376624          | 29376953,29361385,29376953          | 2 |
|       | chr6  | + | 29376624,29369101                   | 29376953,29369383                   | 1 |
| 19608 | chr6  | - | 29435002,29434614                   | 29435175,29434716                   | 1 |
| 19610 | chr6  | - | 29508751,29490826                   | 29508868,29491866                   | 1 |
| 19620 | chr6  | - | 30325938,30316387                   | 30326066,30316745                   | 1 |
| 19621 | chr6  | + | 30389643,30394426,30377708,30389643 | 30389865,30394575,30377795,30389865 | 1 |
| 19623 | chr6  | - | 30429056,30431232                   | 30431137,30432985                   | 2 |
|       | chr6  | - | 30431232,30429056                   | 30432985,30431137                   | 1 |
| 19630 | chr6  | + | 30692715,30697051                   | 30692852,30698457                   | 2 |
| 19631 | chr6  | - | 30774367,30699405                   | 30774556,30699504                   | 1 |
| 19635 | chr6  | + | 31170430,31285990,31287229          | 31170519,31286062,31287394          | 1 |
|       | chr6  | + | 31194104,31194104,31235002          | 31194358,31194358,31235120          | 1 |
| 19637 | chr6  | + | 31442644,31449886                   | 31442784,31449941                   | 1 |
| 19642 | chr6  | - | 32187665,32107831                   | 32187819,32108044                   | 1 |
| 19644 | chr6  | - | 32753889,32958482,32842291          | 32754025,32958564,32842375          | 1 |
| 1964  | chr10 | - | 75379544,75359519                   | 75379656,75359833                   | 1 |
| 19663 | chr6  | + | 35158080,35196021                   | 35158180,35196080                   | 1 |
| 19668 | chr6  | - | 35489538,35458905                   | 35489787,35462317                   | 1 |
| 19673 | chr6  | - | 36693326,36665662                   | 36693500,36665762                   | 2 |
| 19674 | chr6  | - | 37084253,37046675                   | 37084349,37047626                   | 1 |
| 19678 | chr6  | + | 37915500,37910780,37915500          | 37916289,37910855,37916289          | 1 |
| 19688 | chr6  | + | 38411474,38434074                   | 38411612,38434125                   | 2 |
|       | chr6  | + | 38412962,38420151,38449186          | 38413066,38420222,38449276          | 1 |
| 19701 | chr6  | - | 39317642,39314501                   | 39317765,39314610                   | 1 |
| 19705 | chr6  | - | 39415582,39412376                   | 39415700,39413450                   | 1 |
| 19707 | chr6  | + | 39526361,39537367                   | 39526508,39538768                   | 1 |
| 19736 | chr6  | + | 41153439,41497770                   | 41153451,41497877                   | 1 |
| 1973  | chr10 | - | 75688934,75700494,75688934          | 75689060,75700610,75689060          | 1 |
| 19766 | chr6  | + | 41564077,41565915                   | 41564840,41566266                   | 1 |
|       | chr6  | + | 41568066,41569605,41569605,41569921 | 41568314,41569799,41569799,41570077 | 7 |
| 19779 | chr6  | + | 42196809,42197732                   | 42196938,42197768                   | 1 |
| 1977  | chr10 | - | 75830052,75818908                   | 75830226,75819141                   | 1 |
| 19823 | chr6  | + | 47452425,47473076                   | 47452589,47473124                   | 1 |
| 19824 | chr6  | - | 47492364,47490675,47494438          | 47492405,47490854,47494608          | 1 |
|       | chr6  | - | 47508176,47493944                   | 47508293,47494039                   | 1 |
| 1984  | chr10 | - | 76072904,76066206                   | 76072967,76066659                   | 1 |
| 19856 | chr6  | - | 48788170,48786225,48790994,48790359 | 48788364,48786336,48791373,48790977 | 1 |
| 1986  | chr10 | - | 76247815,76233004                   | 76247959,76233064                   | 1 |
|       | chr10 | - | 76288604,76261371                   | 76288737,76261404                   | 1 |
| 19870 | chr6  | + | 49773596,49779301                   | 49773784,49779504                   | 2 |
| 19871 | chr6  | + | 50060375,50128387                   | 50060463,50128519                   | 1 |
| 19873 | chr6  | - | 50294872,50253015                   | 50295029,50253160                   | 1 |
| 19882 | chr6  | - | 51417183,51414426,51414087,51413409 | 51417294,51414546,51414210,51413492 | 1 |
| 1989  | chr10 | - | 76540743,76532564                   | 76540797,76532591                   | 1 |
| 19906 | chr6  | + | 52671291,52715866                   | 52671460,52716478                   | 2 |
|       | chr6  | + | 52683184,52707547                   | 52683343,52707722                   | 2 |
|       | chr6  | + | 52701078,52715014                   | 52701204,52715097                   | 1 |
| 19927 | chr6  | + | 55010902,55023332                   | 55011052,55023418                   | 1 |
| 19976 | chr6  | + | 58823727,58866405                   | 58823839,58866589                   | 1 |
| 19982 | chr6  | - | 60779664,60683097                   | 60779849,60683181                   | 2 |
| 20007 | chr6  | + | 67014606,67029896                   | 67014712,67030646                   | 1 |
|       | chr6  | + | 67028220,67023799,67027241          | 67028411,67024020,67027359          | 1 |
| 20009 | chr6  | + | 67216972,67222132                   | 67217403,67222222                   | 3 |
|       | chr6  | + | 67216972,67222812                   | 67217403,67222932                   | 2 |
|       | chr6  | + | 67216972,67227754                   | 67217403,67227932                   | 1 |
|       | chr6  | + | 67221191,67231641                   | 67221314,67231815                   | 1 |
|       | chr6  | + | 67221191,67231641                   | 67221342,67231815                   | 6 |
|       | chr6  | + | 67227754,67222132                   | 67227932,67224599                   | 8 |
| 20018 | chr6  | + | 70839468,70854081                   | 70839591,70855234                   | 1 |
| 20030 | chr6  | + | 71502392,71532396                   | 71502453,71532602                   | 1 |
|       | chr6  | + | 71529634,71529634,71532396          | 71531568,71531568,71532602          | 1 |
| 20031 | chr6  | - | 71561498,71539034,71561498          | 71562010,71539709,71562010          | 1 |

|       |       |   |                                     |                                     |   |
|-------|-------|---|-------------------------------------|-------------------------------------|---|
| 20034 | chr6  | + | 71801765,71822787                   | 71801874,71822917                   | 2 |
|       | chr6  | + | 71822787,71827242                   | 71822917,71827382                   | 1 |
| 20036 | chr6  | + | 71870435,71904686                   | 71870521,71905144                   | 1 |
| 20042 | chr6  | - | 72292892,72271249                   | 72292962,72271385                   | 1 |
| 20050 | chr6  | - | 72463645,72467931,72465219          | 72464035,72467954,72465378          | 2 |
| 20052 | chr6  | - | 72537604,72530294,72527558          | 72537679,72530363,72527682          | 1 |
| 20055 | chr6  | - | 72584093,72581005                   | 72584226,72581113                   | 1 |
| 20063 | chr6  | + | 73219308,73226675                   | 73219392,73226876                   | 1 |
| 20067 | chr6  | - | 77864399,76882339                   | 77864501,76882521                   | 1 |
| 2007  | chr10 | - | 77454098,77452634                   | 77454186,77452696                   | 2 |
|       | chr10 | - | 77468185,77453416                   | 77468259,77453569                   | 2 |
| 20103 | chr6  | - | 82602617,82596705                   | 82602859,82598030                   | 1 |
| 20106 | chr6  | - | 82869556,82868177                   | 82869676,82868325                   | 2 |
| 20120 | chr6  | - | 83069037,83071196,83069037          | 83069714,83071455,83069714          | 1 |
|       | chr6  | - | 83071196,83071196,83069861          | 83071455,83071455,83070038          | 1 |
| 20121 | chr6  | - | 83075004,83071821                   | 83075023,83072358                   | 1 |
| 20122 | chr6  | + | 83100901,83101879                   | 83101070,83102570                   | 1 |
| 20125 | chr6  | + | 83137757,83141559                   | 83137778,83141712                   | 1 |
|       | chr6  | + | 83141238,83149667                   | 83141355,83150112                   | 1 |
|       | chr6  | + | 83143700,83147484                   | 83143769,83147618                   | 1 |
|       | chr6  | + | 83144981,83149181                   | 83145107,83149271                   | 2 |
| 20146 | chr6  | + | 83745049,83747949,83748537          | 83745276,83748091,83748648          | 1 |
|       | chr6  | + | 83751084,83752261                   | 83751182,83752550                   | 1 |
| 20149 | chr6  | + | 83903328,83907502                   | 83903381,83907586                   | 2 |
|       | chr6  | + | 83926195,83933969,83934770,83936551 | 83926344,83934068,83934889,83936855 | 1 |
|       | chr6  | + | 83928987,83931677                   | 83929903,83931779                   | 1 |
| 20150 | chr6  | + | 83958583,84049409                   | 83958996,84049587                   | 1 |
| 20164 | chr6  | + | 85402012,85409108                   | 85405896,85409262                   | 3 |
|       | chr6  | + | 85402066,85416617                   | 85402121,85416715                   | 1 |
|       | chr6  | + | 85409935,85402012                   | 85410042,85405896                   | 2 |
|       | chr6  | + | 85411038,85416617                   | 85411164,85416715                   | 1 |
| 2016  | chr10 | - | 77867669,77864594                   | 77868031,77864711                   | 2 |
|       | chr10 | - | 77868310,77866249                   | 77868440,77866329                   | 1 |
|       | chr10 | - | 77875564,77868310                   | 77875788,77868440                   | 1 |
| 20178 | chr6  | - | 85909209,85899611                   | 85909285,85899791                   | 1 |
| 20191 | chr6  | + | 86046679,86054475                   | 86046829,86054652                   | 1 |
|       | chr6  | + | 86057890,86068470,86057890          | 86059461,86069549,86059461          | 1 |
| 2019  | chr10 | + | 78039644,78042207                   | 78039772,78042305                   | 1 |
| 20206 | chr6  | - | 86667379,86647442                   | 86667445,86647530                   | 1 |
| 20211 | chr6  | + | 87003195,87004594                   | 87003254,87005418                   | 1 |
| 20229 | chr6  | + | 87842626,87858529                   | 87842713,87858627                   | 1 |
|       | chr6  | + | 87843789,87858529                   | 87843947,87858627                   | 1 |
|       | chr6  | + | 87854081,87862165                   | 87854185,87863588                   | 1 |
| 20230 | chr6  | + | 87864484,87875625                   | 87864689,87875804                   | 2 |
| 20244 | chr6  | + | 88038343,88053358                   | 88038408,88055298                   | 1 |
| 20255 | chr6  | + | 88759329,88775644                   | 88759440,88778351                   | 2 |
| 20257 | chr6  | - | 88823998,88798728                   | 88824038,88798803                   | 1 |
|       | chr6  | - | 88824912,88799188                   | 88824983,88799982                   | 1 |
| 20259 | chr6  | + | 88856531,88852244                   | 88856706,88852524                   | 2 |
| 2025  | chr10 | + | 78256034,78275546                   | 78256077,78275681                   | 1 |
|       | chr10 | + | 78262773,78264546,78277164          | 78263007,78264741,78277510          | 1 |
| 20296 | chr6  | + | 91109154,91122158                   | 91109255,91122337                   | 2 |
| 20305 | chr6  | + | 91694910,91704907                   | 91695023,91709057                   | 1 |
| 20321 | chr6  | + | 94460745,94526327,94549172          | 94460855,94526372,94549246          | 1 |
| 20332 | chr6  | - | 97117242,97108039                   | 97117399,97108192                   | 1 |
| 20340 | chr6  | - | 98953624,98916020                   | 98953674,98916108                   | 2 |
|       | chr6  | - | 98966521,98959897                   | 98966659,98960048                   | 1 |
| 20352 | chr6  | - | 102158307,102120571                 | 102158466,102120684                 | 1 |
| 20354 | chr6  | + | 103614671,103679112                 | 103614794,103683029                 | 2 |
|       | chr6  | + | 103659116,103667552                 | 103659239,103667625                 | 1 |
| 20355 | chr6  | + | 104796018,104811797                 | 104796134,104811966                 | 1 |
| 20365 | chr6  | + | 108366803,108388293                 | 108366952,108388426                 | 2 |
| 20385 | chr6  | + | 113065521,113100095                 | 113065670,113100184                 | 1 |
| 20392 | chr6  | - | 113293829,113284117                 | 113293916,113284402                 | 1 |
|       | chr6  | - | 113293829,113286351                 | 113293916,113286430                 | 1 |
| 20394 | chr6  | + | 113330719,113334075                 | 113330838,113334171                 | 1 |

|       |       |   |                                     |                                     |    |
|-------|-------|---|-------------------------------------|-------------------------------------|----|
|       | chr6  | + | 113331956,113338764                 | 113332068,113339643                 | 1  |
| 20398 | chr6  | + | 113392588,113397251                 | 113395002,113398221                 | 2  |
| 20401 | chr6  | + | 113438064,113442680                 | 113438175,113443332                 | 1  |
| 20404 | chr6  | + | 113510079,113518597                 | 113510189,113518710                 | 2  |
| 20406 | chr6  | + | 113566058,113554765,113566058       | 113566945,113554890,113566945       | 3  |
| 20414 | chr6  | + | 114232767,114265298                 | 114232870,114267516                 | 1  |
| 20418 | chr6  | - | 114840634,114812107                 | 114840824,114812454                 | 1  |
| 20425 | chr6  | + | 115509610,115526913                 | 115510118,115527003                 | 1  |
|       | chr6  | + | 115524580,115526913                 | 115524617,115527003                 | 1  |
| 20428 | chr6  | - | 115576308,115580215                 | 115576426,115581386                 | 1  |
| 20434 | chr6  | + | 115852875,115875770                 | 115852929,115875935                 | 1  |
|       | chr6  | + | 115875433,115876253,115876253       | 115875513,115876708,115876708       | 1  |
| 20437 | chr6  | - | 115930595,115910733                 | 115930772,115910880                 | 1  |
| 20464 | chr6  | - | 118348091,118333398                 | 118348173,118333893                 | 1  |
|       | chr6  | - | 118367405,118334256                 | 118367596,118334418                 | 1  |
| 20467 | chr6  | - | 118498847,118465798                 | 118498977,118465911                 | 1  |
| 20469 | chr6  | + | 119150839,119164787                 | 119150969,119165624                 | 1  |
| 2048  | chr10 | + | 79172415,79173382                   | 79172572,79173665                   | 3  |
|       | chr10 | + | 79173382,79172802,79173382          | 79173665,79172885,79173665          | 1  |
| 20491 | chr6  | - | 120758379,120747894                 | 120758489,120747982                 | 1  |
|       | chr6  | - | 120768351,120751060                 | 120768417,120751155                 | 1  |
| 20509 | chr6  | - | 122283308,122272342                 | 122283458,122272490                 | 1  |
| 2050  | chr10 | - | 79201072,79198874                   | 79201195,79199028                   | 1  |
| 20510 | chr6  | - | 122403626,122402571                 | 122406681,122402781                 | 3  |
| 2052  | chr10 | - | 79223535,79221283,79224309,79223733 | 79223651,79221981,79224378,79223827 | 6  |
|       | chr10 | - | 79224174,79223535                   | 79224244,79223651                   | 1  |
| 20546 | chr6  | - | 124399791,124399507                 | 124400052,124399656                 | 1  |
| 20552 | chr6  | + | 124648087,124650024,124650690       | 124648195,124650118,124650869       | 1  |
| 20553 | chr6  | - | 124655532,124654404                 | 124655674,124654676                 | 1  |
|       | chr6  | - | 124661893,124654404                 | 124662145,124654676                 | 2  |
| 20554 | chr6  | + | 124662721,124664847                 | 124662806,124664977                 | 1  |
|       | chr6  | + | 124663079,124664001                 | 124663761,124664186                 | 3  |
|       | chr6  | + | 124663079,124665077                 | 124663159,124665181                 | 1  |
| 20558 | chr6  | - | 124699479,124689201                 | 124699617,124689431                 | 2  |
| 20559 | chr6  | - | 124718255,124717557                 | 124718355,124717616                 | 1  |
| 2055  | chr10 | + | 79270322,79275087                   | 79270453,79275109                   | 1  |
| 20570 | chr6  | - | 124863698,124864652,124863698       | 124864250,124864731,124864250       | 13 |
|       | chr6  | - | 124864652,124863698,124863698       | 124864731,124864250,124864250       | 3  |
|       | chr6  | - | 124864652,124863698                 | 124864731,124864250                 | 1  |
|       | chr6  | - | 124864935,124863698                 | 124865007,124864250                 | 10 |
|       | chr6  | - | 124867577,124864652,124863698       | 124867949,124864731,124864250       | 2  |
| 20572 | chr6  | + | 124882116,124885619                 | 124882194,124886158                 | 1  |
|       | chr6  | + | 124882428,124885250                 | 124882555,124885463                 | 1  |
| 20573 | chr6  | - | 124908469,124908836                 | 124908790,124909655                 | 2  |
|       | chr6  | - | 124908836,124908469                 | 124909655,124908790                 | 2  |
| 20580 | chr6  | + | 125046180,125078809,125079837       | 125046278,125079005,125080519       | 1  |
|       | chr6  | + | 125051470,125072494                 | 125051712,125072566                 | 1  |
|       | chr6  | + | 125051470,125072494,125072835       | 125051712,125072566,125072973       | 1  |
|       | chr6  | + | 125070661,125071290                 | 125070750,125071435                 | 1  |
|       | chr6  | + | 125072494,125079837                 | 125072566,125080519                 | 3  |
| 20584 | chr6  | - | 125121653,125120151                 | 125121777,125120232                 | 1  |
|       | chr6  | - | 125121850,125120151                 | 125121965,125120232                 | 1  |
|       | chr6  | - | 125124242,125118880                 | 125124376,125119007                 | 1  |
|       | chr6  | - | 125125868,125126669                 | 125126245,125126844                 | 9  |
| 2058  | chr10 | - | 79329916,79329156                   | 79330052,79329330                   | 1  |
| 205   | chr1  | - | 42705044,42749876                   | 42705301,42751335                   | 1  |
|       | chr1  | - | 42723685,42749876                   | 42723848,42751335                   | 29 |
|       | chr1  | - | 42724430,42705044                   | 42724517,42705301                   | 3  |
|       | chr1  | - | 42724430,42720400                   | 42724517,42720447                   | 6  |
|       | chr1  | - | 42749876,42723685                   | 42751335,42723848                   | 4  |
| 20613 | chr6  | - | 127100599,127089120                 | 127101066,127089269                 | 2  |
| 20614 | chr6  | + | 127099643,127099406                 | 127099836,127099581                 | 2  |
| 2062  | chr10 | - | 79360309,79358371                   | 79360443,79358455                   | 1  |
| 2068  | chr10 | - | 79441136,79440707                   | 79441350,79441049                   | 1  |
|       | chr10 | - | 79442240,79439864                   | 79442498,79440598                   | 2  |
| 2075  | chr10 | + | 79579280,79588223,79588777,79588977 | 79579652,79588313,79588910,79589114 | 1  |



|       |       |   |                                     |                                     |    |
|-------|-------|---|-------------------------------------|-------------------------------------|----|
|       | chr10 | + | 79587546,79590648                   | 79587630,79590845                   | 1  |
|       | chr10 | + | 79588223,79588977,79588223,79588977 | 79588313,79589114,79588313,79589114 | 6  |
|       | chr10 | + | 79588223,79588977                   | 79588313,79589114                   | 1  |
| 2077  | chr10 | + | 79605109,79608171                   | 79605351,79608556                   | 1  |
| 2078  | chr10 | + | 79616335,79619109                   | 79616464,79621112                   | 2  |
|       | chr10 | + | 79616560,79617878                   | 79616878,79618151                   | 1  |
| 2079  | chr10 | + | 79632552,79633169                   | 79632661,79633251                   | 1  |
| 20808 | chr6  | - | 128383543,128382439                 | 128383627,128382679                 | 1  |
|       | chr6  | - | 128386587,128383543                 | 128386732,128383627                 | 1  |
|       | chr6  | - | 128388423,128380124                 | 128388649,128380898                 | 4  |
| 2083  | chr10 | + | 79715818,79718668                   | 79715902,79718757                   | 1  |
| 20871 | chr6  | - | 131330893,131317782                 | 131330983,131317881                 | 2  |
|       | chr6  | - | 131333518,131329375                 | 131333552,131329498                 | 1  |
| 20907 | chr6  | + | 134172882,134216275                 | 134173047,134220165                 | 1  |
| 20910 | chr6  | - | 134456213,134404714                 | 134456385,134404851                 | 1  |
| 20918 | chr6  | + | 134965593,134966599                 | 134965665,134966671                 | 1  |
| 2092  | chr10 | - | 79808066,79807577                   | 79808158,79807686                   | 1  |
| 20947 | chr6  | - | 137470673,137432062                 | 137470810,137432243                 | 1  |
| 2095  | chr10 | - | 79855285,79856637,79855285          | 79855763,79856815,79855763          | 5  |
|       | chr10 | - | 79861962,79857310,79856637          | 79862111,79857401,79856815          | 2  |
| 20961 | chr6  | + | 140372897,140544769                 | 140372977,140545630                 | 1  |
| 20978 | chr6  | - | 142442619,142438768                 | 142442737,142439124                 | 1  |
| 20991 | chr6  | - | 144064963,143976799                 | 144065174,143976972                 | 1  |
| 21009 | chr6  | - | 146498153,146499160,146498153       | 146498507,146499296,146498507       | 2  |
|       | chr6  | - | 146499160,146498153                 | 146499296,146498507                 | 1  |
|       | chr6  | - | 146500893,146499160,146498153       | 146501033,146499296,146498507       | 1  |
| 21010 | chr6  | + | 146537261,146541155                 | 146537379,146541269                 | 1  |
| 21019 | chr6  | + | 146996655,147004373                 | 146996823,147004513                 | 1  |
|       | chr6  | + | 146996655,147008663                 | 146996823,147008773                 | 1  |
|       | chr6  | + | 147004373,147009944                 | 147004513,147010014                 | 1  |
| 21056 | chr7  | + | 3584905,3588263                     | 3585003,3588353                     | 1  |
| 21061 | chr7  | - | 3629390,3634959                     | 3630451,3637636                     | 2  |
| 21070 | chr7  | + | 4071187,4085264                     | 4071382,4085340                     | 2  |
|       | chr7  | + | 4080902,4082182                     | 4080975,4082238                     | 1  |
| 21080 | chr7  | - | 4436990,4433980                     | 4437064,4434031                     | 1  |
| 21085 | chr7  | - | 4497181,4493428                     | 4497354,4493546                     | 2  |
|       | chr7  | - | 4497834,4491366                     | 4498169,4491900                     | 4  |
| 21088 | chr7  | - | 4587817,4584660                     | 4587875,4584742                     | 2  |
|       | chr7  | - | 4591910,4587817                     | 4591975,4587875                     | 1  |
|       | chr7  | - | 4592866,4585070                     | 4593019,4585203                     | 1  |
| 21090 | chr7  | + | 4644255,4650639                     | 4644350,4650708                     | 1  |
|       | chr7  | + | 4650520,4655729                     | 4650554,4655876                     | 1  |
|       | chr7  | + | 4657621,4660419                     | 4657719,4660618                     | 2  |
| 21104 | chr7  | + | 4875504,4874216,4874809             | 4876604,4874241,4874931             | 3  |
| 21117 | chr7  | + | 5031906,5046555                     | 5032079,5046859                     | 4  |
|       | chr7  | + | 5041520,5044442,5045500             | 5041770,5044567,5045584             | 4  |
|       | chr7  | + | 5041520,5048755                     | 5041770,5049013                     | 1  |
|       | chr7  | + | 5044442,5045500,5041520             | 5044567,5045584,5041770             | 1  |
|       | chr7  | + | 5044442,5045500                     | 5044567,5045584                     | 1  |
|       | chr7  | + | 5044442,5045500,5046555             | 5044567,5045584,5046859             | 14 |
|       | chr7  | + | 5046555,5044442,5045500             | 5046859,5044567,5045584             | 16 |
|       | chr7  | + | 5046555,5047489                     | 5046859,5047576                     | 1  |
| 2111  | chr10 | - | 80204640,80173164                   | 80204956,80173212                   | 1  |
| 21132 | chr7  | + | 6135463,6139735                     | 6136033,6139844                     | 1  |
| 2113  | chr10 | - | 80258843,80260654,80259335          | 80259267,80260722,80259399          | 1  |
|       | chr10 | - | 80260825,80260517,80260825          | 80261371,80260584,80261371          | 1  |
| 2114  | chr10 | + | 80263940,80265536                   | 80264103,80265646                   | 1  |
| 21164 | chr7  | - | 7241585,7243109                     | 7241984,7244667                     | 1  |
|       | chr7  | - | 7243109,7241585                     | 7244667,7241984                     | 6  |
| 2117  | chr10 | + | 80289400,80291205                   | 80289650,80291378                   | 1  |
|       | chr10 | + | 80290981,80291205,80291205,80291455 | 80291039,80291378,80291378,80291541 | 1  |
| 21195 | chr7  | + | 13065012,13066283                   | 13065095,13068063                   | 1  |
| 21206 | chr7  | + | 13507683,13510740                   | 13507737,13510950                   | 2  |
| 21212 | chr7  | + | 13610992,13614691                   | 13611125,13614944                   | 1  |
|       | chr7  | + | 13612965,13614691                   | 13613101,13614944                   | 1  |
|       | chr7  | + | 13613181,13614012                   | 13613298,13614127                   | 1  |

|       |       |   |                                     |                                     |    |
|-------|-------|---|-------------------------------------|-------------------------------------|----|
|       | chr7  | + | 13613181,13615803                   | 13613298,13615941                   | 1  |
|       | chr7  | + | 13613369,13615024                   | 13613484,13615344                   | 1  |
|       | chr7  | + | 13613756,13615637                   | 13613903,13615724                   | 3  |
|       | chr7  | + | 13614436,13616037                   | 13614473,13616378                   | 1  |
|       | chr7  | + | 13615024,13615803                   | 13615344,13615941                   | 1  |
|       | chr7  | + | 13615637,13616037                   | 13615724,13616378                   | 2  |
|       | chr7  | + | 13615803,13615024,13615803          | 13615941,13615344,13615941          | 1  |
| 21213 | chr7  | - | 13619177,13617783,13619983,13619177 | 13619391,13617914,13620093,13619391 | 1  |
| 21220 | chr7  | + | 13874742,13896544                   | 13874844,13896776                   | 1  |
|       | chr7  | + | 13877807,13893819                   | 13877864,13893873                   | 1  |
| 21238 | chr7  | - | 16505653,16505196                   | 16505707,16505295                   | 1  |
|       | chr7  | - | 16505797,16505391,16502556          | 16505822,16505466,16502888          | 9  |
| 21239 | chr7  | - | 16527523,16531178,16530971          | 16527723,16531407,16531147          | 1  |
| 21243 | chr7  | + | 16694399,16700551                   | 16694516,16700620                   | 1  |
| 21246 | chr7  | + | 16763057,16764093                   | 16763217,16764144                   | 1  |
|       | chr7  | + | 16767668,16764093,16767389          | 16767817,16764144,16767501          | 1  |
| 21250 | chr7  | - | 16860604,16860812                   | 16860724,16861456                   | 2  |
| 21251 | chr7  | + | 16897474,16902466                   | 16897763,16903683                   | 1  |
| 21252 | chr7  | - | 16912402,16944384,16915961          | 16913278,16944490,16916031          | 1  |
|       | chr7  | - | 16955635,16905584                   | 16955809,16906229                   | 1  |
|       | chr7  | - | 16972989,16953857                   | 16973134,16954000                   | 1  |
| 21261 | chr7  | + | 17323810,17334260                   | 17323887,17334641                   | 1  |
|       | chr7  | + | 17328618,17334037                   | 17328717,17334097                   | 13 |
|       | chr7  | + | 17332609,17334037,17323810,17328618 | 17332723,17334097,17323887,17328717 | 1  |
| 21264 | chr7  | + | 17423197,17425554                   | 17423338,17426278                   | 1  |
| 21272 | chr7  | - | 17592255,17591408                   | 17592343,17591587                   | 1  |
|       | chr7  | - | 17593962,17591408                   | 17594061,17591587                   | 1  |
|       | chr7  | - | 17595223,17593962,17593074,17592452 | 17595345,17594061,17593180,17592595 | 2  |
| 21305 | chr7  | + | 19619755,19638895                   | 19619882,19638991                   | 1  |
| 21307 | chr7  | + | 19663403,19667624                   | 19663586,19668125                   | 1  |
|       | chr7  | + | 19667624,19663403,19667624          | 19668125,19663586,19668125          | 1  |
| 2130  | chr10 | + | 80532894,80538255                   | 80533023,80538404                   | 2  |
|       | chr10 | + | 80538255,80543771                   | 80538404,80543958                   | 1  |
| 21315 | chr7  | + | 19771450,19776932                   | 19771520,19777067                   | 1  |
|       | chr7  | + | 19787178,19789250                   | 19787276,19789381                   | 2  |
| 21318 | chr7  | - | 19844151,19843210,19856862,19844580 | 19844242,19843268,19857166,19844614 | 4  |
| 21320 | chr7  | + | 19872595,19879196                   | 19872859,19879266                   | 1  |
|       | chr7  | + | 19872595,19879767                   | 19872859,19879814                   | 1  |
| 21322 | chr7  | + | 19930454,19940449                   | 19930545,19940521                   | 1  |
|       | chr7  | + | 19939674,19940641                   | 19939774,19940710                   | 1  |
| 2132  | chr10 | + | 80577770,80586364                   | 80577917,80587081                   | 4  |
| 21335 | chr7  | - | 20120337,20116855                   | 20120457,20116942                   | 1  |
|       | chr7  | - | 20147159,20116315                   | 20147747,20116775                   | 3  |
| 21340 | chr7  | - | 20220656,20216928                   | 20220752,20219311                   | 4  |
|       | chr7  | - | 20231190,20228400,20221009          | 20231349,20228518,20221200          | 10 |
|       | chr7  | - | 20232064,20221009                   | 20232188,20221200                   | 1  |
| 2135  | chr10 | + | 80643972,80643972,80644633          | 80644155,80644155,80645241          | 1  |
|       | chr10 | + | 80643972,80644633                   | 80644155,80645241                   | 1  |
|       | chr10 | + | 80643972,80644633,80644633          | 80644155,80645241,80645241          | 1  |
| 2136  | chr10 | + | 80654503,80655170                   | 80654927,80655743                   | 1  |
|       | chr10 | + | 80655170,80653342,80654503          | 80655743,80653391,80654927          | 1  |
| 21394 | chr7  | + | 25284174,25286583                   | 25284321,25286756                   | 1  |
| 21398 | chr7  | + | 25351237,25357227                   | 25351312,25357318                   | 1  |
|       | chr7  | + | 25355890,25358243                   | 25355945,25358451                   | 2  |
| 2139  | chr10 | - | 80681899,80672797                   | 80681958,80672833                   | 1  |
| 21400 | chr7  | + | 25379436,25393370                   | 25379581,25393487                   | 1  |
|       | chr7  | + | 25380018,25392886                   | 25380167,25392976                   | 1  |
| 21413 | chr7  | + | 25689425,25710802                   | 25689516,25710966                   | 1  |
|       | chr7  | + | 25698158,25698638                   | 25698188,25698735                   | 1  |
|       | chr7  | + | 25698158,25701819                   | 25698188,25701960                   | 1  |
|       | chr7  | + | 25701822,25707559                   | 25701960,25707685                   | 1  |
| 21414 | chr7  | - | 25757120,25757545                   | 25757431,25757747                   | 1  |
| 21415 | chr7  | - | 25765569,25763187                   | 25765715,25763595                   | 1  |
|       | chr7  | - | 25774586,25765569                   | 25774723,25765715                   | 2  |
|       | chr7  | - | 25775381,25766537                   | 25775574,25766661                   | 3  |
|       | chr7  | - | 25779368,25774586                   | 25779478,25774723                   | 1  |

|       |       |   |                                     |                                     |    |
|-------|-------|---|-------------------------------------|-------------------------------------|----|
|       | chr7  | - | 25779554,25772453                   | 25779753,25772622                   | 1  |
|       | chr7  | - | 25782150,25766537                   | 25782419,25766661                   | 5  |
|       | chr7  | - | 25783692,25763932                   | 25783827,25764024                   | 1  |
|       | chr7  | - | 25783918,25763187                   | 25784032,25763595                   | 1  |
|       | chr7  | - | 25783918,25772996                   | 25784032,25773147                   | 2  |
|       | chr7  | - | 25783918,25775381                   | 25784032,25775574                   | 1  |
|       | chr7  | - | 25783918,25779368                   | 25784032,25779478                   | 1  |
|       | chr7  | - | 25790773,25763187                   | 25790914,25763595                   | 1  |
| 21416 | chr7  | - | 25808004,25800323                   | 25808114,25800549                   | 1  |
|       | chr7  | - | 25853003,25798808                   | 25853193,25798937                   | 1  |
|       | chr7  | - | 25853003,25845748                   | 25853193,25845802                   | 1  |
|       | chr7  | - | 25853462,25798808                   | 25853591,25798937                   | 1  |
| 21426 | chr7  | + | 26069867,26077435,26077668          | 26070017,26077587,26077800          | 3  |
|       | chr7  | + | 26070428,26075589                   | 26070558,26075711                   | 1  |
| 21427 | chr7  | - | 26082104,26080067                   | 26082194,26080395                   | 1  |
| 21429 | chr7  | + | 26091126,26092466                   | 26091302,26092553                   | 1  |
| 2142  | chr10 | + | 80720289,80725367                   | 80720319,80725726                   | 4  |
|       | chr10 | + | 80722331,80723652,80724375          | 80722551,80723718,80724460          | 1  |
|       | chr10 | + | 80722833,80725192                   | 80723271,80725279                   | 1  |
|       | chr10 | + | 80723652,80725192                   | 80723718,80725279                   | 1  |
|       | chr10 | + | 80724375,80725192,80725367          | 80724460,80725279,80725726          | 2  |
| 21441 | chr7  | - | 26423180,26414964                   | 26423289,26415452                   | 2  |
| 21443 | chr7  | - | 26456215,26454160                   | 2645679,26454517                    | 1  |
| 21466 | chr7  | - | 27951702,27943676                   | 27951731,27944230                   | 1  |
| 21474 | chr7  | + | 28051745,28058973                   | 28051820,28059163                   | 1  |
| 21475 | chr7  | - | 28111505,28092786                   | 28111631,28092939                   | 1  |
|       | chr7  | - | 28113986,28107829                   | 28114061,28107955                   | 1  |
| 21476 | chr7  | - | 28132020,28128261                   | 28132191,28128440                   | 1  |
| 21485 | chr7  | - | 28324573,28320807                   | 28324688,28320947                   | 1  |
|       | chr7  | - | 28327107,28317593                   | 28327200,28317693                   | 2  |
| 21489 | chr7  | - | 28449416,28458361,28449968          | 28449592,28459617,28450117          | 3  |
| 21500 | chr7  | - | 28827357,28827827                   | 28827745,28827995                   | 8  |
| 21508 | chr7  | - | 29069670,29073489,29072924          | 29069782,29073514,29073061          | 1  |
| 21510 | chr7  | - | 29090649,29091441                   | 29091034,29091548                   | 12 |
| 21511 | chr7  | - | 29104985,29101301                   | 29105132,29101460                   | 2  |
|       | chr7  | - | 29107021,29099914                   | 29107158,29100289                   | 3  |
|       | chr7  | - | 29115598,29114601                   | 29115664,29114671                   | 1  |
| 21531 | chr7  | + | 29562014,29563940                   | 29562121,29564009                   | 1  |
| 21534 | chr7  | + | 29598297,29606234                   | 29598416,29606292                   | 1  |
| 21535 | chr7  | + | 29610892,29615232                   | 29611097,29615297                   | 1  |
| 21541 | chr7  | + | 29768007,29787366                   | 29768073,29787422                   | 1  |
|       | chr7  | + | 29769101,29771810                   | 29769166,29771858                   | 1  |
| 21542 | chr7  | - | 29844487,29788752                   | 29844728,29788804                   | 1  |
|       | chr7  | - | 29854578,29794073                   | 29854668,29794220                   | 2  |
| 21554 | chr7  | - | 30045389,30041348                   | 30045449,30041856                   | 1  |
| 21556 | chr7  | + | 30094663,30096283,30097866          | 30094771,30096411,30097945          | 2  |
|       | chr7  | + | 30094663,30097866                   | 30094771,30097945                   | 1  |
|       | chr7  | + | 30096283,30097866,30096283,30097866 | 30096411,30097945,30096411,30097945 | 1  |
|       | chr7  | + | 30096283,30097866                   | 30096411,30097945                   | 1  |
|       | chr7  | + | 30096283,30100642                   | 30096411,30100755                   | 1  |
|       | chr7  | + | 30096283,30101262                   | 30096411,30101344                   | 1  |
|       | chr7  | + | 30098100,30099301                   | 30098232,30099421                   | 2  |
|       | chr7  | + | 30101262,30101499,30099157,30100642 | 30101344,30102605,30099208,30100755 | 1  |
| 21559 | chr7  | - | 30510215,30510053,30502004,30497984 | 30510499,30510107,30502176,30498044 | 1  |
| 2155  | chr10 | - | 80832942,80830875,80829623          | 80833126,80830980,80830295          | 1  |
|       | chr10 | - | 80832942,80831267                   | 80833126,80831501                   | 1  |
|       | chr10 | - | 80833839,80829623                   | 80833965,80830295                   | 2  |
| 21561 | chr7  | + | 30571193,30577378                   | 30571322,30579559                   | 2  |
| 21586 | chr7  | - | 30971960,30975497,30971960          | 30972552,30975576,30972552          | 1  |
|       | chr7  | - | 30971960,30975677,30975070          | 30972552,30975746,30975187          | 2  |
|       | chr7  | - | 30978896,30975070                   | 30979120,30975187                   | 1  |
|       | chr7  | - | 30980024,30972689                   | 30980067,30972748                   | 2  |
|       | chr7  | - | 30980024,30977338                   | 30980067,30977396                   | 1  |
| 21587 | chr7  | - | 31016598,31009158                   | 31016797,31009366                   | 1  |
| 21592 | chr7  | + | 31094499,31098937                   | 31094578,31099322                   | 1  |
| 21599 | chr7  | - | 31221197,31220764                   | 31221221,31220827                   | 3  |

|       |       |   |                                     |                                     |    |
|-------|-------|---|-------------------------------------|-------------------------------------|----|
|       | chr7  | - | 31224953,31223196,31223196,31221197 | 31225082,31223296,31223296,31221221 | 1  |
|       | chr7  | - | 31225162,31220991,31226073          | 31225321,31221062,31226148          | 3  |
|       | chr7  | - | 31226660,31225162                   | 31226791,31225321                   | 4  |
|       | chr7  | - | 31229336,31220991                   | 31229480,31221062                   | 1  |
|       | chr7  | - | 31229336,31223196                   | 31229480,31223296                   | 1  |
| 21605 | chr7  | - | 31314913,31308962                   | 31315066,31309607                   | 1  |
| 2160  | chr10 | - | 80951172,80949203                   | 80951211,80950350                   | 1  |
| 21617 | chr7  | - | 31448113,31429844                   | 31448146,31430177                   | 1  |
| 21619 | chr7  | - | 31443521,31442617                   | 31443684,31442763                   | 1  |
| 21623 | chr7  | - | 31513675,31513005                   | 31513735,31513127                   | 1  |
| 21641 | chr7  | - | 31836374,31829971,31827533          | 31836473,31830046,31827923          | 2  |
| 21642 | chr7  | - | 31836726,31838043                   | 31837006,31838141                   | 6  |
| 21647 | chr7  | - | 31915145,31924775,31917559          | 31915603,31924888,31917680          | 3  |
|       | chr7  | - | 31920544,31915145                   | 31920758,31915603                   | 3  |
|       | chr7  | - | 31923132,31919009                   | 31923276,31919097                   | 1  |
|       | chr7  | - | 31923770,31915145,31915145          | 31923969,31915603,31915603          | 1  |
|       | chr7  | - | 31924415,31917559                   | 31924566,31917680                   | 3  |
| 2164  | chr10 | + | 81023963,81027592                   | 81024061,81027655                   | 1  |
|       | chr10 | + | 81027592,81028216                   | 81027655,81029109                   | 3  |
| 21659 | chr7  | - | 34902330,34894566                   | 34902382,34895258                   | 1  |
| 2165  | chr10 | + | 81045481,81048957                   | 81045631,81049118                   | 1  |
|       | chr10 | + | 81048957,81049599,81049836          | 81049082,81049673,81050086          | 1  |
|       | chr10 | + | 81050297,81050618,81052164          | 81050545,81050766,81052241          | 2  |
|       | chr10 | + | 81050618,81052969                   | 81050766,81053215                   | 1  |
| 21660 | chr7  | - | 34925715,34932538,34927756          | 34926485,34932694,34927893          | 1  |
| 21662 | chr7  | - | 34990586,34987833,34992624,34990824 | 34990663,34987909,34992777,34990954 | 2  |
| 21671 | chr7  | + | 35983649,35984243,35985294          | 35983773,35984340,35985472          | 1  |
| 21672 | chr7  | - | 35987947,35988286                   | 35988243,35989400                   | 3  |
| 21686 | chr7  | - | 38495086,38554614                   | 38495949,38554771                   | 1  |
| 21692 | chr7  | - | 39051145,39047838                   | 39051223,39048328                   | 1  |
| 2169  | chr10 | + | 81102772,81103636,81105045          | 81103557,81103735,81105164          | 1  |
|       | chr10 | + | 81105261,81109049                   | 81108712,81109178                   | 4  |
|       | chr10 | + | 81109537,81105261                   | 81109603,81108712                   | 9  |
|       | chr10 | + | 81109844,81105261                   | 81110354,81108712                   | 1  |
| 21711 | chr7  | - | 48745216,48737935                   | 48746438,48737996                   | 1  |
| 21770 | chr7  | + | 51502095,51502620,51503621,51504911 | 51502178,51503665,51503665,51504969 | 1  |
| 21773 | chr7  | + | 51606926,51600268                   | 51609197,51600387                   | 4  |
| 21777 | chr7  | + | 51645865,51648718                   | 51646394,51648937                   | 1  |
| 21782 | chr7  | - | 51745496,51746532                   | 51746216,51746619                   | 4  |
| 21798 | chr7  | - | 52098185,52097352                   | 52098286,52097469                   | 1  |
|       | chr7  | - | 52100381,52097572                   | 52100543,52097670                   | 1  |
| 21802 | chr7  | - | 52120131,52119981                   | 52120372,52120039                   | 18 |
|       | chr7  | - | 52122179,52118904                   | 52122287,52119102                   | 14 |
|       | chr7  | - | 52122429,52119752                   | 52122487,52119857                   | 10 |
|       | chr7  | - | 52122562,52119981                   | 52122645,52120039                   | 1  |
|       | chr7  | - | 52122744,52118437                   | 52122882,52118814                   | 1  |
| 21803 | chr7  | - | 52138468,52136292                   | 52138554,52136481                   | 1  |
|       | chr7  | - | 52140449,52134755                   | 52140580,52134884                   | 2  |
|       | chr7  | - | 52147152,52140202                   | 52147277,52140290                   | 1  |
|       | chr7  | - | 52147514,52139488                   | 52147773,52139617                   | 1  |
| 21805 | chr7  | - | 52163093,52155742                   | 52163202,52156185                   | 1  |
|       | chr7  | - | 52165068,52156356                   | 52165198,52156491                   | 1  |
| 21807 | chr7  | - | 52220453,52221995                   | 52221557,52222080                   | 1  |
|       | chr7  | - | 52225987,52216127                   | 52226089,52216280                   | 1  |
| 21809 | chr7  | - | 52241652,52239104                   | 52241702,52239245                   | 1  |
| 21813 | chr7  | - | 52260774,52258319                   | 52260993,52258741                   | 1  |
|       | chr7  | - | 52267694,52261210                   | 52267795,52261293                   | 1  |
| 21815 | chr7  | - | 52305574,52289114                   | 52305736,52289602                   | 2  |
|       | chr7  | - | 52306587,52290248                   | 52306700,52290365                   | 1  |
| 21828 | chr7  | - | 52401992,52397209                   | 52402178,52397472                   | 1  |
| 21829 | chr7  | + | 52412101,52414359                   | 52412168,52414489                   | 6  |
|       | chr7  | + | 52412972,52413956,52414359,52414622 | 52413152,52414038,52414489,52414698 | 1  |
| 21830 | chr7  | + | 52428261,52430120,52430120          | 52428372,52431509,52431509          | 1  |
| 21840 | chr7  | - | 52596287,52595944                   | 52596356,52596141                   | 1  |
|       | chr7  | - | 52599110,52594642                   | 52599173,52595372                   | 1  |
|       | chr7  | - | 52614157,52596287                   | 52614232,52596356                   | 2  |

|       |       |   |                                     |                                     |    |
|-------|-------|---|-------------------------------------|-------------------------------------|----|
|       | chr7  | - | 52616934,52597056                   | 52617189,52597154                   | 1  |
| 21846 | chr7  | - | 52679448,52677754                   | 52679567,52677884                   | 1  |
| 2184  | chr10 | - | 82217709,82214128                   | 82217840,82214210                   | 1  |
| 21867 | chr7  | + | 52955336,52956593                   | 52955709,52956736                   | 1  |
|       | chr7  | + | 52955795,52959082                   | 52955870,52959248                   | 1  |
| 21875 | chr7  | + | 53042179,53059001                   | 53042330,53059500                   | 1  |
|       | chr7  | + | 53047680,53055805                   | 53047765,53055941                   | 1  |
| 21876 | chr7  | - | 53063545,53062008                   | 53063617,53063218                   | 1  |
|       | chr7  | - | 53065940,53063302                   | 53066089,53063457                   | 1  |
|       | chr7  | - | 53066898,53062008                   | 53066979,53063218                   | 1  |
| 21887 | chr7  | + | 53296838,53336764                   | 53296939,53336884                   | 1  |
|       | chr7  | + | 53316248,53326144                   | 53316336,53326272                   | 2  |
|       | chr7  | + | 53333395,53338604                   | 53333506,53338697                   | 2  |
| 21896 | chr7  | - | 53881578,53845976                   | 53881639,53846143                   | 2  |
|       | chr7  | - | 53889124,53876930,53889124          | 53889280,53877044,53889280          | 1  |
| 218   | chr1  | + | 44037152,44039916                   | 44037249,44040161                   | 1  |
|       | chr1  | + | 44042260,44049108                   | 44042299,44049239                   | 1  |
| 21904 | chr7  | + | 54063906,54069485                   | 54064056,54069574                   | 1  |
| 21907 | chr7  | - | 54164274,54162420,54147727          | 54164438,54162547,54147930          | 3  |
| 21913 | chr7  | - | 54345146,54333171                   | 54345388,54334288                   | 1  |
| 2191  | chr10 | - | 82996711,82981088                   | 82996807,82981178                   | 1  |
| 2193  | chr10 | - | 83084273,83068504                   | 83084332,83068679                   | 1  |
| 21963 | chr7  | + | 63174789,63179743                   | 63174933,63179816                   | 2  |
| 21974 | chr7  | + | 66484119,66544076                   | 66484641,66545188                   | 1  |
|       | chr7  | + | 66541423,66560179                   | 66541629,66562097                   | 1  |
|       | chr7  | + | 66542237,66559037                   | 66542402,66559181                   | 2  |
|       | chr7  | + | 66542237,66560179                   | 66542402,66562097                   | 4  |
| 21977 | chr7  | - | 66934228,66924957                   | 66934248,66925112                   | 2  |
|       | chr7  | - | 66934228,66929179                   | 66934248,66929326                   | 13 |
| 21979 | chr7  | - | 67091400,67089461,67082353          | 67091526,67089600,67085875          | 1  |
| 21980 | chr7  | - | 67594963,67144203                   | 67595063,67144299                   | 2  |
| 21984 | chr7  | - | 68347111,68275835                   | 68347152,68275944                   | 3  |
|       | chr7  | - | 68456395,68279150                   | 68456607,68279477                   | 1  |
| 21994 | chr7  | + | 70589657,70873947                   | 70589813,70874075                   | 1  |
| 22000 | chr7  | - | 71530564,71527776                   | 71530706,71527914                   | 1  |
| 22002 | chr7  | + | 71839909,71888145                   | 71840903,71888325                   | 1  |
|       | chr7  | + | 71859316,71897956                   | 71859397,71898756                   | 1  |
|       | chr7  | + | 71878398,71890583                   | 71878544,71890703                   | 2  |
|       | chr7  | + | 71884584,71889301                   | 71884770,71889514                   | 1  |
| 22003 | chr7  | - | 71920589,71918301,71906638          | 71920725,71918538,71906866          | 1  |
| 22012 | chr7  | + | 73207009,73214052                   | 73207157,73214099                   | 1  |
| 22023 | chr7  | + | 74369261,74369911,74369261          | 74369508,74373344,74369508          | 1  |
| 2202  | chr10 | + | 84454864,84471460                   | 84455009,84471538                   | 1  |
| 22030 | chr7  | + | 75352648,75359804                   | 75352759,75359934                   | 1  |
| 22144 | chr7  | - | 79266583,79222715                   | 79266625,79225743                   | 1  |
| 22231 | chr7  | + | 80520392,80562202                   | 80520774,80564783                   | 1  |
| 22232 | chr7  | - | 80664362,80636220                   | 80664594,80636310                   | 1  |
| 22372 | chr7  | - | 85395586,85392040,85392040,85335301 | 85395759,85392284,85392284,85337630 | 1  |
| 22384 | chr7  | + | 86562721,86578318                   | 86562902,86578440                   | 2  |
|       | chr7  | + | 86588626,86593705                   | 86588678,86593801                   | 1  |
| 22388 | chr7  | - | 86748625,86739667                   | 86748776,86739874                   | 1  |
| 22404 | chr7  | - | 87248007,87240684                   | 87248099,87240782                   | 2  |
| 22408 | chr7  | + | 87392169,87397386                   | 87392437,87397517                   | 1  |
| 22410 | chr7  | + | 87430135,87430719                   | 87430636,87430784                   | 1  |
| 22433 | chr7  | - | 88609516,88605813                   | 88609697,88605952                   | 1  |
|       | chr7  | - | 88621831,88609516                   | 88622115,88609697                   | 1  |
|       | chr7  | - | 88622201,88608976                   | 88622384,88609083                   | 1  |
| 22457 | chr7  | - | 90821543,90811573                   | 90821760,90811661                   | 1  |
| 22464 | chr7  | - | 91434283,91430606                   | 91434360,91430681                   | 1  |
| 22466 | chr7  | - | 91749286,91741695                   | 91749336,91741771                   | 1  |
|       | chr7  | - | 91749286,91745687,91743967          | 91749336,91745785,91744067          | 1  |
| 22490 | chr7  | - | 93920212,93910210                   | 93920399,93910397                   | 1  |
| 22505 | chr7  | + | 97177668,97197204                   | 97177737,97197579                   | 1  |
| 22512 | chr7  | - | 97619274,97617338                   | 97619468,97617671                   | 1  |
| 22514 | chr7  | + | 99116627,99189307                   | 99116766,99189376                   | 1  |
|       | chr7  | + | 99566597,99569141,99524063          | 99566643,99569183,99524240          | 2  |

|       |       |   |                                         |                                         |   |
|-------|-------|---|-----------------------------------------|-----------------------------------------|---|
| 22515 | chr7  | + | 99716131,99723253                       | 99716251,99723325                       | 2 |
| 22524 | chr7  | + | 103991435,104003226,103991435           | 103991950,104003247,103991950           | 1 |
| 22539 | chr7  | + | 104801562,104824665                     | 104801717,104824775                     | 1 |
| 22568 | chr7  | + | 106535613,106603421                     | 106535698,106603569                     | 1 |
| 2257  | chr10 | - | 85405953,85405232,85401381              | 85406142,85405343,85401864              | 3 |
| 22589 | chr7  | - | 107493461,107477544                     | 107493616,107477612                     | 1 |
|       | chr7  | - | 107503218,107496314                     | 107503311,107496366                     | 2 |
| 22595 | chr7  | + | 107685584,107687585                     | 107686913,107688326                     | 1 |
| 22597 | chr7  | - | 107719765,107708261,107701092           | 107719803,107708431,107701195           | 1 |
|       | chr7  | - | 107731503,107701092                     | 107731644,107701195                     | 1 |
| 22603 | chr7  | - | 108077082,108030923                     | 108080675,108031033                     | 1 |
| 22608 | chr7  | + | 108470227,108470227,108494405           | 108470547,108470547,108494826           | 1 |
|       | chr7  | + | 108492430,108494148,108470227,108491697 | 108492548,108494201,108470547,108491801 | 1 |
| 22610 | chr7  | + | 108643084,108650527                     | 108643194,108650569                     | 1 |
| 22624 | chr7  | + | 109140159,109160394                     | 109140242,109160623                     | 1 |
| 22627 | chr7  | + | 109234911,109243681                     | 109235124,109243814                     | 1 |
| 22631 | chr7  | - | 109341888,109287981                     | 109343351,109288164                     | 1 |
| 226   | chr1  | + | 45382204,45405445                       | 45382258,45405865                       | 1 |
|       | chr1  | + | 45390851,45391979                       | 45390905,45392033                       | 1 |
|       | chr1  | + | 45392572,45394270                       | 45392626,45394378                       | 1 |
|       | chr1  | + | 45397099,45405445                       | 45397153,45405865                       | 1 |
| 22790 | chr7  | - | 112714564,112707645                     | 112714692,112707822                     | 1 |
|       | chr7  | - | 112715061,112714046,112713485           | 112715211,112714161,112713569           | 1 |
|       | chr7  | - | 112715061,112714046,112713814,112713485 | 112715211,112714161,112713899,112713569 | 1 |
|       | chr7  | - | 112715061,112714046,112715061           | 112715211,112714161,112715211           | 3 |
|       | chr7  | - | 112722195,112714046,112713485           | 112722930,112714161,112713569           | 3 |
|       | chr7  | - | 112722195,112714046,112713814,112713485 | 112722930,112714161,112713899,112713569 | 2 |
|       | chr7  | - | 112722195,112715061                     | 112722930,112715211                     | 1 |
|       | chr7  | - | 112729648,112716091                     | 112729735,112716267                     | 1 |
| 227   | chr1  | - | 45491736,45463866                       | 45491790,45463965                       | 1 |
| 22888 | chr7  | + | 116077929,116083703                     | 116078321,116083795                     | 1 |
|       | chr7  | + | 116077929,116084974                     | 116078321,116085201                     | 1 |
| 22891 | chr7  | - | 116286969,116282085                     | 116287183,116282490                     | 2 |
| 22897 | chr7  | - | 116669052,116667424                     | 116669292,116668194                     | 1 |
| 228   | chr1  | + | 45864515,45876975                       | 45864604,45877035                       | 1 |
| 22906 | chr7  | - | 117059724,117040460                     | 117059818,117040584                     | 1 |
| 22909 | chr7  | + | 117180457,117194526                     | 117180614,117194747                     | 2 |
| 22910 | chr7  | + | 117225305,117235278                     | 117225431,117235440                     | 1 |
| 22911 | chr7  | + | 117269320,117282662                     | 117269381,117282833                     | 1 |
| 22923 | chr7  | - | 118220738,118219793                     | 118220837,118219907                     | 1 |
|       | chr7  | - | 118224412,118217342                     | 118224478,118217464                     | 6 |
| 22938 | chr7  | + | 120446854,120449531,120452129,120456307 | 120447005,120449640,120452223,120456410 | 5 |
| 22947 | chr7  | - | 121376710,121359072                     | 121376871,121359451                     | 2 |
|       | chr7  | - | 121398119,121359976,121359072           | 121398194,121360132,121359451           | 1 |
| 22948 | chr7  | - | 121417929,121409947                     | 121417974,121410058                     | 1 |
| 22959 | chr7  | - | 123269554,123267631                     | 123272207,123268334                     | 1 |
| 22961 | chr7  | - | 123560966,123560966,123537714           | 123562095,123562095,123537872           | 1 |
| 22966 | chr7  | - | 125386718,125284823                     | 125387151,125285003                     | 2 |
| 22977 | chr7  | + | 125934881,125943951                     | 125934993,125944014                     | 1 |
| 22993 | chr7  | + | 126970816,126976184,126977777           | 126970890,126976289,126977915           | 1 |
| 23006 | chr7  | + | 127797494,127802534                     | 127797575,127803037                     | 3 |
| 23010 | chr7  | + | 127933568,127945509,127929937           | 127933759,127945633,127930008           | 1 |
| 23030 | chr7  | + | 129291570,129281761,129291570           | 129292558,129281873,129292558           | 3 |
| 23031 | chr7  | - | 129314014,129313406                     | 129314138,129313786                     | 1 |
| 23033 | chr7  | + | 129688146,129738479,129744203           | 129688293,129738587,129744344           | 1 |
|       | chr7  | + | 129738479,129771169                     | 129738587,129777915                     | 1 |
| 23041 | chr7  | + | 130544957,130566220                     | 130545079,130566312                     | 2 |
| 23056 | chr7  | - | 133314543,133250584                     | 133314656,133250746                     | 1 |
| 23060 | chr7  | - | 133515471,133514691,133514248           | 133515661,133514790,133514420           | 1 |
|       | chr7  | - | 133517714,133517435                     | 133517793,133517587                     | 1 |
|       | chr7  | - | 133520350,133513580                     | 133520925,133513927                     | 2 |
| 23065 | chr7  | - | 133610507,133618132,133610507           | 133611287,133618644,133611287           | 2 |
|       | chr7  | - | 133618132,133614635                     | 133618644,133614811                     | 1 |
| 23067 | chr7  | - | 133639334,133638090                     | 133639405,133638237                     | 1 |
|       | chr7  | - | 133644236,133638713                     | 133644387,133638783                     | 2 |
|       | chr7  | - | 133644769,133637933                     | 133644826,133638006                     | 1 |

|       |       |   |                                         |                                         |   |
|-------|-------|---|-----------------------------------------|-----------------------------------------|---|
| 23068 | chr7  | - | 133707140,133700885                     | 133707266,133701011                     | 1 |
| 23073 | chr7  | + | 133815051,133815247,133807442,133814143 | 133815181,133815394,133807518,133814208 | 1 |
| 23077 | chr7  | - | 133844505,133843770                     | 133844610,133843986                     | 2 |
|       | chr7  | - | 133844803,133843770                     | 133844923,133843986                     | 1 |
| 23078 | chr7  | + | 133903139,133908236                     | 133903332,133908391                     | 1 |
| 23080 | chr7  | + | 133923540,133921284,133921819           | 133924028,133921467,133921928           | 1 |
| 23082 | chr7  | - | 133932537,133931630                     | 133932589,133931732                     | 1 |
| 23083 | chr7  | - | 133939730,133941487,133940108           | 133939814,133941628,133940269           | 1 |
| 23084 | chr7  | + | 133968166,133966816                     | 133968608,133967726                     | 2 |
| 23087 | chr7  | - | 134001189,133995946,133995946           | 134001301,133996505,133996505           | 1 |
| 23089 | chr7  | - | 134023761,134015419                     | 134023833,134015623                     | 1 |
| 23091 | chr7  | + | 134072392,134074146,134085024           | 134072812,134074316,134085077           | 1 |
|       | chr7  | + | 134072392,134084846                     | 134072812,134084936                     | 1 |
|       | chr7  | + | 134084846,134088398                     | 134084936,134089123                     | 1 |
| 23093 | chr7  | + | 134096287,134111440,134111673,134113566 | 134096587,134111558,134111770,134113783 | 1 |
|       | chr7  | + | 134105250,134111220                     | 134105451,134111259                     | 6 |
|       | chr7  | + | 134105250,134111440                     | 134105451,134111558                     | 1 |
|       | chr7  | + | 134111440,134113566                     | 134111558,134113783                     | 3 |
| 23095 | chr7  | + | 134122428,134123048                     | 134122510,134124015                     | 1 |
| 23098 | chr7  | - | 134161056,134164518                     | 134163869,134164725                     | 3 |
|       | chr7  | - | 134164518,134161056                     | 134164725,134163869                     | 1 |
| 23099 | chr7  | - | 134170464,134168817                     | 134170533,134169668                     | 1 |
| 23127 | chr7  | + | 134721048,134723323                     | 134722800,134723487                     | 3 |
|       | chr7  | + | 134723180,134721048                     | 134723246,134722800                     | 1 |
|       | chr7  | + | 134723323,134721048                     | 134723487,134722800                     | 5 |
| 23132 | chr7  | - | 134850689,134850689,134848491           | 134850851,134850851,134848689           | 1 |
| 23135 | chr7  | + | 134890288,134895523                     | 134890651,134896035                     | 1 |
|       | chr7  | + | 134893494,134911265                     | 134893581,134912442                     | 1 |
| 23139 | chr7  | - | 134967773,134958577                     | 134968045,134958677                     | 1 |
| 23140 | chr7  | + | 134985321,134986197                     | 134985582,134986272                     | 1 |
|       | chr7  | + | 134989533,134990001,134991901           | 134989642,134990139,134992012           | 1 |
|       | chr7  | + | 134989533,134991901                     | 134989642,134992012                     | 1 |
|       | chr7  | + | 134991901,134992264,134990001           | 134992012,134992479,134990139           | 1 |
| 23143 | chr7  | - | 135030690,135030463,135028957           | 135030932,135030609,135029795           | 2 |
| 23149 | chr7  | + | 135116067,135119401                     | 135116284,135119434                     | 1 |
|       | chr7  | + | 135123405,135125304                     | 135123507,135125545                     | 1 |
| 23164 | chr7  | - | 135440975,135414892                     | 135441090,135416129                     | 1 |
| 23166 | chr7  | - | 135588325,135587794                     | 135588421,135587918                     | 2 |
| 23175 | chr7  | - | 137659618,137652520                     | 137659682,137652772                     | 1 |
| 23177 | chr7  | + | 137765234,137907767                     | 137770355,137908298                     | 1 |
|       | chr7  | + | 137806529,137895347                     | 137806655,137895424                     | 1 |
|       | chr7  | + | 137860216,137907767                     | 137860353,137908298                     | 1 |
|       | chr7  | + | 137885643,137888040                     | 137885815,137888130                     | 1 |
|       | chr7  | + | 137902678,137907767                     | 137902839,137908298                     | 1 |
| 23189 | chr7  | + | 138514659,138517578,138527438           | 138514903,138517777,138527514           | 2 |
|       | chr7  | + | 138517578,138527438,138514659,138517578 | 138517777,138527514,138514903,138517777 | 2 |
|       | chr7  | + | 138527438,138531131                     | 138527514,138531352                     | 2 |
| 23203 | chr7  | - | 139761588,139749157                     | 139761823,139750013                     | 1 |
|       | chr7  | - | 139761588,139758451                     | 139761823,139758547                     | 1 |
| 23211 | chr7  | + | 140174365,140175516                     | 140174595,140177093                     | 1 |
| 23217 | chr7  | + | 140901015,140906581                     | 140901211,140906662                     | 1 |
|       | chr7  | + | 140901015,140912389                     | 140901211,140912828                     | 1 |
|       | chr7  | + | 140909281,140912389                     | 140909469,140912828                     | 1 |
| 23220 | chr7  | + | 141044848,141053785,141059800,141061704 | 141045026,141053910,141059882,141061770 | 1 |
|       | chr7  | + | 141061704,141072280                     | 141061770,141073215                     | 1 |
| 23225 | chr7  | + | 141969077,142350143                     | 141969175,142350289                     | 1 |
| 23239 | chr7  | - | 144602322,144567256,144567256           | 144602418,144568034,144568034           | 1 |
| 23250 | chr7  | - | 146306568,146289537                     | 146306685,146290266                     | 1 |
| 23251 | chr7  | + | 146414542,146428518,146414542           | 146414907,146428872,146414907           | 1 |
| 23256 | chr7  | - | 146789096,146786849,146792977,146789286 | 146789174,146787178,146793013,146789423 | 1 |
| 23265 | chr7  | - | 147215725,147187324                     | 147215885,147187497                     | 1 |
| 23268 | chr7  | - | 147258483,147255785                     | 147258597,147255932                     | 2 |
| 2326  | chr10 | - | 86155130,86154373                       | 86155209,86154493                       | 2 |
|       | chr10 | - | 86156658,86153585                       | 86156904,86153873                       | 1 |
|       | chr10 | - | 86165653,86154884                       | 86165770,86155040                       | 3 |
|       | chr10 | - | 86167038,86154373                       | 86167141,86154493                       | 2 |

|       |       |   |                                         |                                         |   |
|-------|-------|---|-----------------------------------------|-----------------------------------------|---|
| 23303 | chr7  | + | 148046775,148047738                     | 148046871,148047858                     | 2 |
| 23304 | chr7  | - | 148067661,148062252                     | 148067768,148062353                     | 1 |
| 23305 | chr7  | + | 148069398,148083506                     | 148069477,148083623                     | 3 |
|       | chr7  | + | 148072409,148076230                     | 148072465,148076310                     | 2 |
| 23315 | chr7  | + | 148247172,148250952                     | 148247323,148251020                     | 2 |
|       | chr7  | + | 148253225,148256173                     | 148253335,148256593                     | 2 |
|       | chr7  | + | 148253598,148257535                     | 148253699,148257662                     | 2 |
| 23319 | chr7  | + | 148332979,148340455                     | 148333047,148340601                     | 1 |
|       | chr7  | + | 148337548,148338673,148321207           | 148337683,148338787,148321309           | 2 |
|       | chr7  | + | 148338873,148340455                     | 148340222,148340601                     | 3 |
| 23321 | chr7  | - | 148377853,148375003                     | 148377935,148377093                     | 3 |
| 23322 | chr7  | + | 148393084,148393729,148392846           | 148393149,148393869,148393008           | 1 |
| 23325 | chr7  | + | 148426783,148448307                     | 148426867,148448650                     | 1 |
|       | chr7  | + | 148433119,148446858                     | 148433295,148447013                     | 1 |
| 23326 | chr7  | - | 148450973,148450121,148449557           | 148451190,148450214,148449947           | 2 |
| 23330 | chr7  | - | 148510340,148487498                     | 148510515,148487588                     | 2 |
| 23345 | chr7  | - | 148715467,148682499                     | 148715600,148682580                     | 1 |
| 23346 | chr7  | + | 148784600,148795705                     | 148784794,148795814                     | 1 |
|       | chr7  | + | 148800097,148809516                     | 148800235,148809680                     | 3 |
| 23355 | chr7  | + | 149030550,149036955                     | 149030752,149037107                     | 2 |
| 23357 | chr7  | + | 149184282,149184824,149186746           | 149184463,149184919,149186794           | 1 |
|       | chr7  | + | 149184537,149186746,149188379           | 149184627,149186794,149190148           | 3 |
|       | chr7  | + | 149187919,149184824                     | 149190152,149184919                     | 1 |
| 23358 | chr7  | - | 149198735,149196157                     | 149202410,149196282                     | 1 |
| 23359 | chr7  | - | 149275848,149267400                     | 149276171,149268935                     | 1 |
| 23364 | chr7  | - | 149541412,149536314                     | 149542019,149536411                     | 1 |
| 23365 | chr7  | - | 149573641,149563237                     | 149573775,149563360                     | 1 |
| 23371 | chr7  | + | 149719021,149721974                     | 149719099,149722057                     | 1 |
| 23382 | chr7  | + | 150251113,150252565                     | 150251211,150252667                     | 1 |
| 23387 | chr7  | - | 150646757,150644244                     | 150646901,150644926                     | 1 |
| 23390 | chr7  | - | 150710598,150707305                     | 150710621,150707335                     | 1 |
|       | chr7  | - | 150726092,150718213                     | 150726151,150718285                     | 1 |
| 23391 | chr7  | - | 150754219,150747763,150745032,150743609 | 150754288,150747831,150745116,150743911 | 1 |
| 23397 | chr7  | - | 150881419,150878762                     | 150881517,150878889                     | 1 |
| 2339  | chr10 | - | 87606684,87595838                       | 87606840,87595943                       | 1 |
| 23407 | chr7  | - | 151842919,151833928                     | 151843018,151833984                     | 1 |
| 2340  | chr10 | + | 87616268,87623620                       | 87616393,87623715                       | 1 |
| 23422 | chr8  | - | 3173479,3158695                         | 3173619,3158830                         | 1 |
| 23424 | chr8  | + | 3448382,3450780                         | 3450640,3450914                         | 1 |
| 23428 | chr8  | + | 3505737,3512649                         | 3505943,3512865                         | 2 |
|       | chr8  | + | 3510319,3515013                         | 3510426,3515231                         | 1 |
|       | chr8  | + | 3512649,3507148,3511687                 | 3512865,3507316,3511810                 | 3 |
| 23429 | chr8  | + | 3537248,3542297                         | 3537365,3542414                         | 1 |
|       | chr8  | + | 3537450,3543953                         | 3537520,3544267                         | 1 |
|       | chr8  | + | 3543953,3516680,3543066                 | 3544267,3516749,3543176                 | 2 |
| 23431 | chr8  | + | 3602553,3608393                         | 3602627,3608512                         | 1 |
|       | chr8  | + | 3607790,3608393                         | 3607890,3608512                         | 1 |
| 23435 | chr8  | + | 3641734,3642645                         | 3641820,3643644                         | 1 |
| 23449 | chr8  | + | 4187240,4203513                         | 4187465,4203642                         | 1 |
|       | chr8  | + | 4191584,4206055                         | 4191674,4206151                         | 1 |
| 23462 | chr8  | - | 4749291,4735979                         | 4749460,4736407                         | 1 |
|       | chr8  | - | 4768143,4741847                         | 4768311,4741966                         | 1 |
| 23481 | chr8  | - | 11217912,11217264                       | 11218052,11217345                       | 1 |
|       | chr8  | - | 11240040,11221288                       | 11240067,11221439                       | 1 |
|       | chr8  | - | 11245892,11238997                       | 11245937,11239051                       | 1 |
| 23482 | chr8  | + | 11427006,11429306                       | 11427063,11429528                       | 2 |
|       | chr8  | + | 11440378,11443555                       | 11440450,11443702                       | 1 |
| 23485 | chr8  | + | 11510226,11512894,11509321,11509452     | 11510347,11513284,11509372,11509557     | 1 |
|       | chr8  | + | 11510226,11512894                       | 11510347,11513284                       | 1 |
|       | chr8  | + | 11510226,11512894,11512894              | 11510347,11513284,11513284              | 1 |
| 23486 | chr8  | - | 11541897,11514492                       | 11542003,11514699                       | 1 |
|       | chr8  | - | 11542518,11518923                       | 11542590,11518990                       | 3 |
| 23490 | chr8  | + | 11824504,11824504,11832969              | 11827148,11827148,11835217              | 1 |
|       | chr8  | + | 11824504,11832969,11824504              | 11827148,11835217,11827148              | 5 |
|       | chr8  | + | 11824504,11832969                       | 11827148,11835217                       | 7 |
| 23496 | chr8  | - | 12637666,12636945                       | 12639715,12637014                       | 1 |



|       |       |   |                                     |                                     |   |
|-------|-------|---|-------------------------------------|-------------------------------------|---|
| 23497 | chr8  | + | 12812311,12831084                   | 12812401,12831258                   | 1 |
| 23499 | chr8  | + | 13002637,13018938                   | 13002797,13020505                   | 1 |
| 23505 | chr8  | + | 13165848,13173779                   | 13165967,13173950                   | 1 |
|       | chr8  | + | 13165848,13174418                   | 13165967,13175338                   | 1 |
|       | chr8  | + | 13167157,13171204                   | 13167377,13171383                   | 1 |
|       | chr8  | + | 13167806,13173626                   | 13167965,13173693                   | 1 |
| 23506 | chr8  | - | 13179582,13176868,13186682          | 13179755,13177142,13186979          | 1 |
| 23519 | chr8  | + | 13760976,13763819                   | 13761117,13763911                   | 2 |
|       | chr8  | + | 13763819,13775707                   | 13763911,13775769                   | 1 |
|       | chr8  | + | 13769376,13775707                   | 13769502,13775769                   | 1 |
| 23540 | chr8  | + | 18861476,18881737                   | 18861546,18884413                   | 3 |
| 23602 | chr8  | + | 23320740,23327596                   | 23320773,23327681                   | 2 |
| 23607 | chr8  | + | 23525187,23534818                   | 23525475,23536668                   | 1 |
| 23609 | chr8  | + | 23650831,23671358                   | 23650917,23671950                   | 1 |
| 2360  | chr10 | + | 89242579,89280679                   | 89242769,89281145                   | 1 |
| 23613 | chr8  | - | 23758653,23752776                   | 23758728,23752828                   | 1 |
|       | chr8  | - | 23760960,23738736                   | 23761027,23738841                   | 2 |
| 23618 | chr8  | + | 23878917,23888884                   | 23878960,23889021                   | 1 |
| 23642 | chr8  | + | 26680612,26683594                   | 26680723,26683732                   | 1 |
| 23652 | chr8  | - | 26939237,26933166                   | 26939331,26933360                   | 1 |
|       | chr8  | - | 26941744,26928075                   | 26941820,26928135                   | 2 |
|       | chr8  | - | 26945431,26930097                   | 26945526,26930190                   | 4 |
| 23657 | chr8  | - | 27179030,27150140                   | 27179141,27150223                   | 1 |
|       | chr8  | - | 27221207,27178321                   | 27221293,27178409                   | 2 |
| 2365  | chr10 | + | 90564499,90545783,90564499          | 90565358,90546041,90565358          | 1 |
| 2366  | chr10 | - | 90580788,90579322                   | 90580961,90579869                   | 3 |
| 23685 | chr8  | + | 32200133,32206660                   | 32200367,32207519                   | 2 |
| 23691 | chr8  | - | 32947676,33057455                   | 32948200,33057506                   | 2 |
| 23706 | chr8  | + | 35230772,35233149                   | 35230911,35233674                   | 1 |
| 23730 | chr8  | + | 40134429,40250179                   | 40136376,40250468                   | 1 |
|       | chr8  | + | 40193796,40242613,40130675,40159978 | 40193871,40242704,40130816,40160068 | 1 |
| 23736 | chr8  | - | 41595368,41592671                   | 41596658,41593002                   | 1 |
| 23737 | chr8  | + | 41629163,41631629                   | 41629307,41636488                   | 1 |
| 23748 | chr8  | + | 42359453,42415986                   | 42360448,42416079                   | 1 |
|       | chr8  | + | 42365104,42410617                   | 42365247,42410753                   | 1 |
|       | chr8  | + | 42368909,42397511                   | 42369100,42397632                   | 1 |
|       | chr8  | + | 42411180,42417336,42410617          | 42411341,42417697,42410753          | 2 |
| 23750 | chr8  | - | 42484918,42482818                   | 42485010,42482841                   | 1 |
|       | chr8  | - | 42500156,42484309                   | 42500227,42484420                   | 1 |
| 23774 | chr8  | + | 47060892,47080891                   | 47060942,47081016                   | 2 |
|       | chr8  | + | 47064562,47070675                   | 47064649,47070822                   | 1 |
|       | chr8  | + | 47068876,47082055                   | 47069034,47082213                   | 1 |
| 23777 | chr8  | - | 47130539,47120891                   | 47130653,47121073                   | 1 |
| 23787 | chr8  | + | 48167768,48168217                   | 48168148,48168830                   | 2 |
| 23798 | chr8  | + | 49222611,49225696,49225696          | 49222728,49227014,49227014          | 1 |
| 2379  | chr10 | + | 92931792,92934598                   | 92931933,92934710                   | 1 |
|       | chr10 | + | 92937220,92937662,92943435,92945706 | 92937324,92937733,92943531,92945811 | 3 |
|       | chr10 | + | 92943435,92945706,92937662          | 92943531,92945811,92937733          | 1 |
|       | chr10 | + | 92943435,92945706                   | 92943531,92945811                   | 1 |
|       | chr10 | + | 92947407,92943435,92945706          | 92947641,92943531,92945811          | 4 |
| 23842 | chr8  | - | 67098147,67073693                   | 67098344,67073812                   | 1 |
|       | chr8  | - | 67098147,67076256                   | 67098344,67076356                   | 1 |
|       | chr8  | - | 67098147,67090170                   | 67098344,67090288                   | 1 |
| 23844 | chr8  | - | 67227828,67218658                   | 67227969,67219771                   | 1 |
| 23864 | chr8  | + | 71343186,71351175                   | 71343266,71351543                   | 1 |
|       | chr8  | + | 71344553,71348088                   | 71344716,71348166                   | 1 |
|       | chr8  | + | 71344553,71348088,71348950          | 71344716,71348166,71349028          | 1 |
|       | chr8  | + | 71348088,71348950,71344553          | 71348166,71349028,71344716          | 3 |
|       | chr8  | + | 71351175,71348088,71348950          | 71351543,71348166,71349028          | 2 |
| 23865 | chr8  | + | 71411341,71426182                   | 71413578,71426284                   | 1 |
| 23867 | chr8  | + | 71636328,71632181,71636328          | 71637606,71632286,71637606          | 1 |
| 23878 | chr8  | + | 72324800,72329346                   | 72324926,72329461                   | 2 |
| 23881 | chr8  | + | 72395893,72382978,72394476          | 72396191,72383052,72394583          | 2 |
|       | chr8  | + | 72395893,72390366,72394476          | 72396191,72390502,72394583          | 1 |
| 23884 | chr8  | - | 72419140,72418080                   | 72419219,72418309                   | 3 |
| 23886 | chr8  | - | 72432368,72436821,72435575          | 72433873,72437123,72435768          | 1 |

|       |       |   |                                     |                                     |    |
|-------|-------|---|-------------------------------------|-------------------------------------|----|
|       | chr8  | - | 72435575,72432368,72436821,72435575 | 72435768,72433873,72437123,72435768 | 1  |
|       | chr8  | - | 72459677,72497988,72459677          | 72459935,72498170,72459935          | 3  |
| 23887 | chr8  | - | 72546518,72546034                   | 72547596,72546146                   | 2  |
|       | chr8  | - | 72546518,72546254                   | 72547596,72546332                   | 1  |
| 23888 | chr8  | + | 72584434,72595012                   | 72584558,72595158                   | 1  |
| 23891 | chr8  | - | 72640487,72625799                   | 72640567,72625958                   | 1  |
| 23896 | chr8  | + | 72704604,72705047                   | 72704748,72705222                   | 1  |
| 23898 | chr8  | - | 72746416,72744091,72744091          | 72746548,72744776,72744776          | 2  |
|       | chr8  | - | 72753426,72746416                   | 72753509,72746548                   | 1  |
| 2389  | chr10 | - | 93334232,93353841,93342284          | 93334394,93353954,93342387          | 1  |
| 23902 | chr8  | - | 72826221,72816764                   | 72826351,72817586                   | 1  |
| 23903 | chr8  | + | 72831848,72828532                   | 72831902,72830821                   | 4  |
| 23910 | chr8  | - | 73010126,73008978                   | 73010271,73009081                   | 2  |
|       | chr8  | - | 73011066,73008432                   | 73011257,73008550                   | 1  |
| 23911 | chr8  | + | 73027719,73027203,73027719          | 73027980,73027391,73027980          | 1  |
| 23912 | chr8  | - | 73029654,73028194,73030395,73029654 | 73029859,73028408,73030478,73029859 | 1  |
|       | chr8  | - | 73030560,73028882                   | 73030638,73028959                   | 1  |
| 23915 | chr8  | + | 73051649,73051907                   | 73051735,73051934                   | 1  |
|       | chr8  | + | 73056475,73055420                   | 73056648,73056009                   | 1  |
| 23917 | chr8  | + | 73118721,73120146                   | 73118883,73120311                   | 3  |
| 23918 | chr8  | - | 73123016,73122104                   | 73123062,73122133                   | 1  |
|       | chr8  | - | 73123272,73123016,73122600,73122104 | 73123343,73123062,73122671,73122133 | 1  |
|       | chr8  | - | 73124294,73123586                   | 73124384,73123656                   | 2  |
|       | chr8  | - | 73126130,73123016                   | 73126215,73123062                   | 3  |
|       | chr8  | - | 73132023,73122104                   | 73132172,73122133                   | 1  |
| 2391  | chr10 | - | 93456261,93452884                   | 93456411,93453032                   | 1  |
|       | chr10 | - | 93457632,93436579                   | 93457757,93436787                   | 1  |
| 23926 | chr8  | + | 73279754,73281796                   | 73279982,73282506                   | 1  |
| 23927 | chr8  | - | 73284266,73282547                   | 73284437,73282923                   | 2  |
| 23929 | chr8  | - | 73294482,73293803                   | 73294663,73293946                   | 1  |
|       | chr8  | - | 73298554,73296031                   | 73299251,73296163                   | 1  |
| 23934 | chr8  | - | 73367056,73374498,73372073          | 73368460,73374640,73372201          | 1  |
|       | chr8  | - | 73374498,73372073,73370393          | 73374640,73372201,73370463          | 2  |
| 23943 | chr8  | + | 73845680,73883223                   | 73845743,73883351                   | 1  |
| 23944 | chr8  | + | 73891668,73893425                   | 73891747,73893628                   | 1  |
| 23947 | chr8  | - | 73914819,73909267                   | 73914953,73909692                   | 1  |
| 23948 | chr8  | + | 73926644,73928093                   | 73926774,73928444                   | 1  |
| 2394  | chr10 | + | 93662694,93683425,93683425          | 93662777,93683693,93683693          | 2  |
| 23953 | chr8  | - | 74008898,73999917                   | 74009009,74000820                   | 1  |
| 23958 | chr8  | + | 74069122,74067031                   | 74069249,74068387                   | 2  |
|       | chr8  | + | 74069445,74067031,74069122          | 74069565,74067130,74069249          | 1  |
|       | chr8  | + | 74069445,74067031                   | 74069565,74068387                   | 3  |
| 23962 | chr8  | + | 74118567,74119955                   | 74118669,74120166                   | 2  |
|       | chr8  | + | 74118959,74119955,74119955,74122976 | 74119100,74120166,74120166,74123107 | 5  |
|       | chr8  | + | 74118959,74119955,74119955,74124313 | 74119100,74120166,74120166,74124428 | 3  |
| 23966 | chr8  | - | 74181901,74175022                   | 74182010,74175186                   | 1  |
| 23970 | chr8  | - | 74234896,74233892,74233473          | 74235005,74234025,74233673          | 1  |
|       | chr8  | - | 74237313,74237873                   | 74237490,74238671                   | 2  |
|       | chr8  | - | 74238170,74237199                   | 74238195,74237224                   | 1  |
| 23986 | chr8  | + | 74764030,74777373                   | 74764142,74777532                   | 3  |
|       | chr8  | + | 74774579,74775641,74779595          | 74774727,74775768,74779721          | 1  |
| 23988 | chr8  | - | 74895584,74891802,74869864          | 74895721,74891885,74870070          | 3  |
|       | chr8  | - | 74896924,74891802                   | 74896975,74891885                   | 1  |
| 23997 | chr8  | + | 75095996,75103858                   | 75096126,75104043                   | 1  |
| 23998 | chr8  | + | 75247186,75257243                   | 75247307,75257387                   | 1  |
|       | chr8  | + | 75263267,75263628,75265372          | 75263387,75263806,75265462          | 12 |
| 2399  | chr10 | + | 94213003,94233689                   | 94213148,94233819                   | 2  |
| 24000 | chr8  | - | 75655729,75383088                   | 75656031,75383244                   | 1  |
| 2400  | chr10 | - | 94385263,94253611                   | 94385404,94256035                   | 1  |
| 24014 | chr8  | + | 80073295,80104932                   | 80073635,80105237                   | 1  |
|       | chr8  | + | 80079563,80092073                   | 80079712,80092257                   | 1  |
| 24024 | chr8  | + | 81599956,81642073                   | 81600437,81642313                   | 1  |
| 24053 | chr8  | - | 86096447,86096296,86118238,86096739 | 86096491,86096354,86118364,86096845 | 1  |
|       | chr8  | - | 86096926,86097309                   | 86097152,86097354                   | 5  |
| 24059 | chr8  | - | 86201829,86197529                   | 86201905,86197609                   | 1  |
| 24060 | chr8  | + | 86245364,86246785                   | 86245423,86246933                   | 1  |

|       |       |   |                                     |                                     |    |
|-------|-------|---|-------------------------------------|-------------------------------------|----|
| 24061 | chr8  | - | 86249053,86248090                   | 86249245,86248259                   | 2  |
| 24063 | chr8  | + | 86455866,86461095                   | 86456052,86461224                   | 1  |
| 24066 | chr8  | + | 86505070,86514326                   | 86505199,86514453                   | 1  |
| 24074 | chr8  | - | 86626644,86625574                   | 86626780,86625745                   | 1  |
| 24076 | chr8  | - | 86662616,86658795                   | 86662728,86658886                   | 1  |
| 24083 | chr8  | + | 87073355,87163136                   | 87073468,87164148                   | 1  |
|       | chr8  | + | 87077160,87153501                   | 87077228,87153609                   | 1  |
|       | chr8  | + | 87107457,87118035                   | 87107659,87118119                   | 1  |
|       | chr8  | + | 87112647,87125287,87110943,87112647 | 87112758,87125404,87111108,87112758 | 1  |
|       | chr8  | + | 87157548,87160410,87157311          | 87157662,87160597,87157450          | 1  |
|       | chr8  | + | 87157548,87160410,87160410,87162510 | 87157662,87160597,87160597,87162764 | 4  |
|       | chr8  | + | 87162510,87157548,87160410          | 87162764,87157662,87160597          | 4  |
| 24090 | chr8  | - | 87250367,87247626                   | 87250501,87247749                   | 10 |
|       | chr8  | - | 87251022,87245541                   | 87251143,87245717                   | 1  |
|       | chr8  | - | 87297252,87251503                   | 87298268,87251578                   | 1  |
| 24095 | chr8  | - | 87370148,87368769,87370606          | 87370250,87368864,87370830          | 1  |
| 24097 | chr8  | + | 87391447,87392122                   | 87391547,87392237                   | 1  |
| 24098 | chr8  | + | 87396618,87409833,87409833,87411033 | 87396731,87410022,87410022,87411294 | 1  |
| 24107 | chr8  | + | 87517082,87517473                   | 87517133,87517541                   | 1  |
|       | chr8  | + | 87519634,87521277                   | 87519836,87521347                   | 1  |
| 24114 | chr8  | + | 87598110,87598832                   | 87598216,87599060                   | 1  |
| 24117 | chr8  | + | 87612452,87620850                   | 87612569,87620953                   | 1  |
|       | chr8  | + | 87615409,87619224                   | 87615519,87619326                   | 1  |
| 2411  | chr10 | + | 95453033,95502885                   | 95453099,95503006                   | 1  |
| 24122 | chr8  | + | 87827260,87831484                   | 87827350,87831969                   | 1  |
| 24126 | chr8  | - | 88078099,88077085                   | 88079267,88077309                   | 7  |
|       | chr8  | - | 88079068,88063948                   | 88079170,88064076                   | 3  |
| 24128 | chr8  | - | 88256271,88246529                   | 88256350,88246647                   | 1  |
|       | chr8  | - | 88304414,88290856                   | 88304476,88290951                   | 1  |
| 24146 | chr8  | - | 90885400,90875698                   | 90885609,90875809                   | 1  |
| 24194 | chr8  | + | 95359867,95367718                   | 95360041,95367855                   | 1  |
| 2419  | chr10 | + | 98431327,98457279                   | 98431758,98457441                   | 1  |
|       | chr10 | + | 98431327,98459401                   | 98431758,98459616                   | 1  |
| 24221 | chr8  | + | 96477874,96490767                   | 96478028,96492856                   | 3  |
| 24229 | chr8  | + | 96703126,96704001                   | 96703238,96704224                   | 1  |
| 24246 | chr8  | - | 97361853,97352176                   | 97361942,97352339                   | 1  |
| 24252 | chr8  | + | 97527150,97536756                   | 97527573,97538091                   | 2  |
| 24255 | chr8  | + | 97619505,97622218                   | 97619696,97622335                   | 1  |
| 24268 | chr8  | + | 98221093,98226962,98230087,98230430 | 98221188,98227077,98230193,98230551 | 1  |
| 24269 | chr8  | + | 98240252,98240506,98240506,98241820 | 98240394,98240701,98240701,98242001 | 9  |
| 24270 | chr8  | - | 98270872,98244043                   | 98271052,98244385                   | 2  |
| 24293 | chr8  | - | 107042087,107040547                 | 107042163,107040634                 | 3  |
|       | chr8  | - | 107050982,107037099                 | 107051062,107037149                 | 1  |
|       | chr8  | - | 107052086,107041806                 | 107052117,107041846                 | 1  |
|       | chr8  | - | 107053955,107040028                 | 107054016,107040121                 | 1  |
| 24317 | chr8  | - | 107812668,107808565                 | 107812950,107808698                 | 1  |
|       | chr8  | - | 107812692,107808929                 | 107813065,107809073                 | 1  |
| 24326 | chr8  | + | 107887162,107888581,107891905       | 107887333,107888716,107893781       | 3  |
| 24331 | chr8  | - | 107996324,107997383,107996890       | 107996781,107997466,107996969       | 1  |
|       | chr8  | - | 107997383,107996890,107996324       | 107997466,107996969,107996781       | 1  |
|       | chr8  | - | 108020709,107996890                 | 108020770,107996969                 | 1  |
| 24333 | chr8  | - | 108063220,108049523                 | 108063392,108049601                 | 1  |
| 24335 | chr8  | + | 108139327,108145293                 | 108139351,108145377                 | 1  |
|       | chr8  | + | 108139443,108144314                 | 108139497,108144476                 | 1  |
|       | chr8  | + | 108139443,108144749                 | 108139497,108144908                 | 1  |
|       | chr8  | + | 108144078,108144749                 | 108144214,108144908                 | 1  |
|       | chr8  | + | 108144078,108145013                 | 108144214,108145210                 | 1  |
| 24337 | chr8  | + | 108217155,108221767                 | 108217296,108221845                 | 1  |
| 24338 | chr8  | - | 108223760,108222307                 | 108223795,108222399                 | 1  |
| 24348 | chr8  | + | 108413960,108414664                 | 108413997,108414780                 | 1  |
| 24364 | chr8  | + | 108713516,108719752                 | 108713642,108719936                 | 1  |
| 24365 | chr8  | - | 108726130,108724613                 | 108728440,108725049                 | 3  |
| 24366 | chr8  | + | 108758747,108775378                 | 108758860,108775594                 | 2  |
|       | chr8  | + | 108761121,108765085                 | 108761958,108765213                 | 1  |
|       | chr8  | + | 108767194,108766010                 | 108767278,108767085                 | 6  |
|       | chr8  | + | 108774207,108775378                 | 108774368,108775594                 | 1  |

|       |       |   |                               |                               |    |
|-------|-------|---|-------------------------------|-------------------------------|----|
| 24380 | chr8  | + | 109566091,109568938           | 109566240,109569656           | 1  |
| 24381 | chr8  | - | 109577921,109574041           | 109578129,109574210           | 2  |
| 24388 | chr8  | + | 109882533,109890948           | 109882681,109893451           | 1  |
| 24391 | chr8  | + | 110057099,110073359           | 110057189,110073435           | 1  |
|       | chr8  | + | 110073680,110080360           | 110073752,110080457           | 1  |
| 24399 | chr8  | + | 112059711,112061840           | 112059876,112061944           | 1  |
| 24400 | chr8  | - | 112079019,112075462           | 112079130,112075558           | 2  |
| 24406 | chr8  | + | 112241661,112245653           | 112241806,112245758           | 1  |
| 24408 | chr8  | + | 112350493,112382698           | 112350635,112382797           | 1  |
| 2441  | chr10 | - | 105231417,105216643,105260215 | 105231447,105216737,105260366 | 1  |
| 24436 | chr8  | + | 113093224,113105859           | 113093327,113106072           | 1  |
| 24442 | chr8  | + | 113370923,113404494           | 113371109,113404578           | 1  |
|       | chr8  | + | 113403532,113405630           | 113403625,113406134           | 1  |
| 24443 | chr8  | - | 113417538,113407127           | 113417658,113407351           | 1  |
| 24447 | chr8  | + | 113560808,113569426           | 113560973,113569571           | 1  |
|       | chr8  | + | 113566140,113577090           | 113566285,113577204           | 2  |
|       | chr8  | + | 113571811,113577788           | 113571925,113577908           | 1  |
| 2444  | chr10 | + | 106295216,106352736           | 106295454,106352805           | 1  |
| 24453 | chr8  | - | 113686537,113681457           | 113686680,113681961           | 1  |
|       | chr8  | - | 113712566,113686537           | 113712750,113686680           | 1  |
|       | chr8  | - | 113715089,113684520           | 113715161,113684641           | 1  |
| 24464 | chr8  | - | 114364257,114292372           | 114364385,114292687           | 1  |
|       | chr8  | - | 114364257,114303150,114292372 | 114364385,114303309,114292687 | 1  |
|       | chr8  | - | 114364257,114354769,114292372 | 114364385,114354889,114292687 | 1  |
|       | chr8  | - | 114365682,114354769           | 114365890,114354889           | 2  |
|       | chr8  | - | 114368993,114303150           | 114369111,114303309           | 1  |
| 24470 | chr8  | - | 114525600,114522699           | 114525787,114522862           | 1  |
| 24493 | chr8  | - | 119578761,119564552           | 119578938,119564746           | 2  |
| 24497 | chr8  | + | 119908857,119950389           | 119908908,119950470           | 1  |
|       | chr8  | + | 119935160,119976979           | 119935322,119977120           | 1  |
|       | chr8  | + | 119935160,119980786           | 119935322,119980857           | 3  |
|       | chr8  | + | 119946744,119980786           | 119946807,119980857           | 1  |
| 24498 | chr8  | + | 120090701,120158684           | 120090786,120159042           | 1  |
| 24502 | chr8  | + | 121029503,121837872           | 121029615,121838094           | 1  |
|       | chr8  | + | 121722754,121836401           | 121722895,121836635           | 1  |
|       | chr8  | + | 121766089,121847294           | 121766343,121847348           | 1  |
| 24507 | chr8  | + | 121989052,121996041           | 121989132,121996535           | 1  |
|       | chr8  | + | 121996041,121994807,121996041 | 121996535,121994885,121996535 | 1  |
| 24509 | chr8  | - | 122046378,122039477           | 122046494,122039609           | 1  |
|       | chr8  | - | 122054948,122037773           | 122055110,122037900           | 1  |
|       | chr8  | - | 122062026,122057220           | 122062094,122057372           | 1  |
| 2451  | chr10 | + | 107677834,107686490           | 107677923,107686706           | 2  |
|       | chr10 | + | 107686490,107688895           | 107686706,107689000           | 1  |
|       | chr10 | + | 107686490,107689812           | 107686706,107689980           | 3  |
| 24522 | chr8  | + | 122465009,122480482           | 122466038,122481457           | 1  |
| 24530 | chr8  | - | 123152371,123132501,123132501 | 123152417,123132930,123132930 | 1  |
| 24531 | chr8  | - | 123191656,123182427           | 123192012,123182522           | 1  |
| 24532 | chr8  | + | 123196624,123197870           | 123196792,123198109           | 2  |
| 24536 | chr8  | - | 123621839,123621456           | 123623052,123621825           | 45 |
|       | chr8  | - | 123632187,123629473           | 123632279,123629587           | 3  |
| 2453  | chr10 | - | 108339270,108073606           | 108339371,108073720           | 1  |
| 24541 | chr8  | - | 124083822,124078004           | 124083990,124078351           | 1  |
| 24545 | chr8  | - | 124321733,124320229           | 124322136,124320643           | 1  |
| 24556 | chr8  | - | 124960909,124958703           | 124961128,124958812           | 2  |
|       | chr8  | - | 124963855,124961726           | 124963958,124961926           | 1  |
| 2455  | chr10 | - | 109201573,109140360           | 109202062,109140596           | 1  |
| 24561 | chr8  | + | 125000089,125004042           | 125000195,125004134           | 1  |
| 24562 | chr8  | - | 125009723,125006548           | 125009856,125006628           | 1  |
| 24564 | chr8  | - | 125098536,125100414,125099036 | 125098927,125100521,125099115 | 3  |
| 24569 | chr8  | - | 125276013,125248847,125248847 | 125276225,125250454,125250454 | 1  |
| 24574 | chr8  | - | 125423503,125424501           | 125423707,125427625           | 4  |
| 24575 | chr8  | + | 125589407,125618373           | 125589609,125618540           | 1  |
|       | chr8  | + | 125594275,125617490           | 125594365,125617647           | 1  |
|       | chr8  | + | 125621293,125617490,125619057 | 125621651,125617647,125619135 | 1  |
| 2457  | chr10 | + | 110211697,110191136,110204172 | 110211883,110191415,110205195 | 2  |
| 24582 | chr8  | + | 125751559,125753011,125754493 | 125751641,125753081,125754617 | 1  |

|       |       |   |                                     |                                     |   |
|-------|-------|---|-------------------------------------|-------------------------------------|---|
| 24587 | chr8  | - | 125821666,125794131                 | 125821726,125794194                 | 1 |
| 24589 | chr8  | + | 125906426,125923164                 | 125906501,125923244                 | 2 |
|       | chr8  | + | 125907224,125916821                 | 125907343,125916914                 | 1 |
|       | chr8  | + | 125923164,125927046                 | 125923244,125928073                 | 3 |
|       | chr8  | + | 125923164,125927049                 | 125923244,125927712                 | 2 |
| 24598 | chr8  | + | 126049518,126057152                 | 126049573,126057218                 | 1 |
|       | chr8  | + | 126052277,126060272                 | 126052364,126060550                 | 2 |
| 2459  | chr10 | + | 110372203,110375692                 | 110372372,110375786                 | 1 |
|       | chr10 | + | 110374792,110376266                 | 110374922,110376678                 | 1 |
| 24602 | chr8  | + | 126347713,126356702                 | 126347794,126356798                 | 1 |
| 24605 | chr8  | - | 126462034,126440183                 | 126462205,126440283                 | 1 |
| 24613 | chr8  | + | 127044726,127053797                 | 127044851,127053901                 | 1 |
| 24617 | chr8  | - | 127199121,127218729,127200240       | 127199257,127218840,127200347       | 1 |
|       | chr8  | - | 127205966,127195226                 | 127206059,127196097                 | 1 |
| 24622 | chr8  | + | 127398118,127411657                 | 127398248,127411719                 | 4 |
| 24625 | chr8  | - | 127432485,127439560,127435640       | 127434663,127439680,127435708       | 1 |
| 2462  | chr10 | + | 110922554,110933095                 | 110922640,110933161                 | 2 |
| 24648 | chr8  | + | 131243891,131246283                 | 131244032,131246522                 | 1 |
| 24649 | chr8  | - | 131585473,131569376                 | 131585797,131569844                 | 1 |
| 24675 | chr9  | - | 6983389,6955906,6992523             | 6983506,6955996,6992628             | 1 |
|       | chr9  | - | 7160153,7084933                     | 7160249,7085076                     | 1 |
| 246   | chr1  | - | 51830076,51819335                   | 51830226,51819470                   | 1 |
| 24703 | chr9  | + | 13551725,13588049                   | 13553844,13588154                   | 1 |
| 24704 | chr9  | - | 13625970,13623302,13621330          | 13626127,13623482,13621447          | 1 |
| 24727 | chr9  | + | 15114801,15119545                   | 15114853,15119575                   | 1 |
|       | chr9  | + | 15118674,15115970                   | 15118708,15118476                   | 1 |
| 2476  | chr10 | - | 114738578,114732484                 | 114738686,114732539                 | 2 |
| 24790 | chr9  | - | 20476578,20532556,20477070          | 20476798,20532658,20477217          | 1 |
|       | chr9  | - | 20532556,20476578                   | 20532658,20476798                   | 1 |
| 24796 | chr9  | - | 20702527,20699532                   | 20702611,20699640                   | 4 |
| 24797 | chr9  | - | 20741605,20712314                   | 20741637,20712405                   | 1 |
|       | chr9  | - | 20756289,20741605                   | 20757067,20741637                   | 1 |
| 24799 | chr9  | + | 20810577,20812266                   | 20810629,20812343                   | 1 |
| 2479  | chr10 | + | 114840255,114857697                 | 114840376,114857935                 | 1 |
| 24802 | chr9  | + | 20839837,20840959                   | 20840086,20841238                   | 2 |
| 24805 | chr9  | - | 20883652,20885418,20884044          | 20883958,20885548,20884256          | 1 |
|       | chr9  | - | 20885627,20881010                   | 20885819,20881085                   | 1 |
| 24806 | chr9  | - | 20915449,20908511                   | 20915604,20909627                   | 1 |
| 24813 | chr9  | + | 21072694,21076911,21077697          | 21072971,21076990,21078812          | 1 |
| 24815 | chr9  | - | 21086258,21079880                   | 21086355,21079945                   | 1 |
|       | chr9  | - | 21091022,21079880                   | 21091128,21079945                   | 1 |
| 24818 | chr9  | + | 21149736,21151478                   | 21149836,21151573                   | 1 |
| 24820 | chr9  | + | 21216346,21222727,21223734,21223882 | 21216541,21222866,21223810,21223992 | 1 |
|       | chr9  | + | 21216346,21223882                   | 21216541,21223992                   | 1 |
| 24821 | chr9  | + | 21277056,21298947                   | 21277217,21299061                   | 1 |
| 24829 | chr9  | + | 21437248,21445355                   | 21437498,21445529                   | 3 |
|       | chr9  | + | 21437248,21490465                   | 21437498,21490719                   | 1 |
|       | chr9  | + | 21440626,21446868                   | 21440725,21447036                   | 1 |
|       | chr9  | + | 21443157,21463269                   | 21443284,21463420                   | 2 |
|       | chr9  | + | 21445355,21482759                   | 21445529,21482837                   | 1 |
|       | chr9  | + | 21452061,21507379                   | 21452119,21507811                   | 2 |
|       | chr9  | + | 21460070,21479510                   | 21460192,21479674                   | 1 |
|       | chr9  | + | 21460070,21481893                   | 21460192,21482121                   | 1 |
|       | chr9  | + | 21477613,21483372                   | 21477780,21483591                   | 1 |
|       | chr9  | + | 21481893,21507379                   | 21482121,21507811                   | 2 |
| 2483  | chr10 | + | 115455454,115693185                 | 115455868,115693299                 | 1 |
| 24844 | chr9  | - | 21819625,21830616                   | 21822338,21830842                   | 7 |
|       | chr9  | - | 21830951,21822865                   | 21831105,21823277                   | 1 |
| 24847 | chr9  | - | 21888466,21877425                   | 21888652,21877531                   | 1 |
|       | chr9  | - | 21888466,21877869                   | 21888652,21878018                   | 1 |
| 24870 | chr9  | + | 25085124,25094252,25060168,25094252 | 25085231,25094353,25060299,25094353 | 1 |
|       | chr9  | + | 25085124,25108996                   | 25085231,25109122                   | 2 |
|       | chr9  | + | 25103979,25115097                   | 25104072,25116150                   | 1 |
| 24874 | chr9  | - | 26657623,26625614                   | 26657716,26625891                   | 1 |
| 24877 | chr9  | + | 26811181,26813936                   | 26811363,26814032                   | 2 |
|       | chr9  | + | 26812730,26813936                   | 26812799,26814032                   | 1 |

|       |       |   |                                     |                                     |   |
|-------|-------|---|-------------------------------------|-------------------------------------|---|
| 24885 | chr9  | - | 29219140,28984045                   | 29219528,28986839                   | 2 |
| 24897 | chr9  | - | 30963774,30959897                   | 30963810,30959972                   | 2 |
| 24898 | chr9  | + | 31137246,31154377                   | 31137450,31154725                   | 1 |
| 2489  | chr10 | - | 115941090,115930748                 | 115941170,115930849                 | 3 |
|       | chr10 | - | 116018508,115954372,115938247       | 116018567,115954439,115938373       | 1 |
| 24916 | chr9  | - | 35016622,35015476                   | 35017750,35015571                   | 3 |
| 24921 | chr9  | - | 35361891,35354365                   | 35361994,35354603                   | 2 |
| 24937 | chr9  | - | 36597364,36590317                   | 36597510,36590429                   | 1 |
|       | chr9  | - | 36604797,36597364                   | 36604938,36597510                   | 1 |
| 24938 | chr9  | + | 36640268,36671081                   | 36640496,36671250                   | 1 |
|       | chr9  | + | 36657931,36678065                   | 36658031,36678141                   | 5 |
|       | chr9  | + | 36671081,36676432                   | 36671250,36676513                   | 4 |
| 24951 | chr9  | - | 37421140,37413377                   | 37421199,37413455                   | 1 |
| 2500  | chr10 | - | 116497703,116494846                 | 116497906,116494974                 | 2 |
|       | chr10 | - | 116499872,116491095                 | 116499938,116491195                 | 1 |
|       | chr10 | - | 116500761,116488053                 | 116500870,116488332                 | 2 |
| 25073 | chr9  | - | 41849646,41809553                   | 41849775,41809688                   | 1 |
| 25078 | chr9  | - | 42405936,42374381,42431008,42430141 | 42406044,42374495,42431161,42430246 | 2 |
|       | chr9  | - | 42463569,42399432                   | 42463623,42399636                   | 1 |
|       | chr9  | - | 42483295,42467800                   | 42483393,42467979                   | 1 |
| 25079 | chr9  | - | 42808439,42800618                   | 42808472,42800654                   | 3 |
| 25105 | chr9  | - | 44089641,44087054                   | 44089774,44087197                   | 1 |
| 25112 | chr9  | + | 44196360,44197659                   | 44196448,44197710                   | 1 |
| 25116 | chr9  | - | 44218773,44219442                   | 44218863,44221616                   | 5 |
|       | chr9  | - | 44219442,44218530                   | 44221616,44218663                   | 3 |
| 25120 | chr9  | + | 44297737,44308827                   | 44297794,44309213                   | 1 |
| 2512  | chr10 | - | 117196227,117187698                 | 117196388,117188023                 | 1 |
|       | chr10 | - | 117210331,117208389                 | 117210422,117208449                 | 2 |
| 25134 | chr9  | - | 44745931,44737744                   | 44746032,44737902                   | 1 |
| 25149 | chr9  | + | 45178267,45199643                   | 45178571,45199680                   | 1 |
|       | chr9  | + | 45178267,45200297                   | 45178571,45200347                   | 2 |
| 25153 | chr9  | - | 45587464,45577491                   | 45587693,45577558                   | 1 |
|       | chr9  | - | 45626060,45610725                   | 45626172,45610860                   | 1 |
| 25169 | chr9  | + | 47605489,47656249                   | 47605627,47656381                   | 1 |
| 25172 | chr9  | - | 48282506,48276618                   | 48282618,48277051                   | 1 |
| 25186 | chr9  | - | 49343313,49316693                   | 49343355,49316810                   | 2 |
|       | chr9  | - | 49353703,49331626                   | 49353888,49331751                   | 1 |
|       | chr9  | - | 49372973,49310250                   | 49373146,49313668                   | 2 |
|       | chr9  | - | 49375441,49351115                   | 49375585,49351247                   | 4 |
|       | chr9  | - | 49376435,49365200                   | 49376654,49365343                   | 2 |
|       | chr9  | - | 49606782,49353257                   | 49607174,49353354                   | 1 |
| 25205 | chr9  | + | 50613406,50600406,50610042          | 50613536,50600512,50610197          | 5 |
| 25218 | chr9  | + | 51877719,51889123                   | 51877883,51889284                   | 1 |
| 25229 | chr9  | - | 53400072,53397282                   | 53400216,53397378                   | 1 |
|       | chr9  | - | 53418317,53402510                   | 53418455,53402611                   | 1 |
| 2524  | chr10 | + | 119509686,119512345,119524007       | 119509833,119512535,119524316       | 1 |
| 2529  | chr10 | + | 119645848,119652596                 | 119646890,119652705                 | 8 |
| 252   | chr1  | - | 52783866,52720128                   | 52784162,52720290                   | 1 |
| 25344 | chr9  | - | 54215360,54222459                   | 54216417,54222537                   | 1 |
|       | chr9  | - | 54217678,54215360                   | 54217770,54216417                   | 2 |
|       | chr9  | - | 54222459,54215360                   | 54222537,54216417                   | 1 |
|       | chr9  | - | 54256957,54226520                   | 54257127,54226642                   | 1 |
|       | chr9  | - | 54305430,54244046                   | 54305605,54244177                   | 1 |
| 25346 | chr9  | - | 54402293,54393158                   | 54402328,54393291                   | 1 |
| 25347 | chr9  | + | 54442972,54446405                   | 54443087,54446470                   | 1 |
|       | chr9  | + | 54442972,54451088                   | 54443087,54452469                   | 1 |
| 25348 | chr9  | - | 54469672,54456822                   | 54469849,54457069                   | 1 |
| 25362 | chr9  | + | 55225286,55248380                   | 55225420,55248454                   | 1 |
| 25363 | chr9  | - | 55336636,55330079                   | 55336736,55330162                   | 1 |
| 25365 | chr9  | - | 55769072,55705887                   | 55769145,55705999                   | 1 |
| 25367 | chr9  | + | 55889651,55903965                   | 55890011,55904062                   | 1 |
| 25375 | chr9  | + | 56744129,56740661                   | 56744582,56744014                   | 5 |
| 25384 | chr9  | + | 56982896,56985726                   | 56983074,56985872                   | 1 |
|       | chr9  | + | 56987052,56987306                   | 56987208,56987515                   | 4 |
|       | chr9  | + | 56988441,56989801                   | 56988585,56990017                   | 1 |
| 25385 | chr9  | - | 56995890,56993182                   | 56996019,56994864                   | 1 |

|       |       |   |                                     |                                     |   |
|-------|-------|---|-------------------------------------|-------------------------------------|---|
| 25393 | chr9  | + | 57369038,57380088                   | 57369222,57380233                   | 4 |
| 25396 | chr9  | + | 57425445,57434886                   | 57425544,57435007                   | 2 |
| 25400 | chr9  | - | 57478486,57476459                   | 57478599,57476550                   | 1 |
|       | chr9  | - | 57478701,57475983                   | 57478815,57476057                   | 1 |
| 25404 | chr9  | - | 57609522,57601077                   | 57609674,57601207                   | 2 |
| 25406 | chr9  | + | 57767115,57768310,57769433          | 57767198,57768368,57769567          | 4 |
| 25407 | chr9  | + | 57787941,57802866                   | 57788135,57802977                   | 1 |
| 25426 | chr9  | - | 58728398,58736207,58728398          | 58728662,58736300,58728662          | 3 |
|       | chr9  | - | 58736788,58736207,58728398          | 58737027,58736300,58728662          | 2 |
|       | chr9  | - | 58750720,58725834                   | 58750915,58725971                   | 2 |
| 25432 | chr9  | + | 59409749,59410673,59410673,59411030 | 59409833,59410857,59410857,59411121 | 1 |
| 25434 | chr9  | + | 59470155,59484476                   | 59470350,59484542                   | 1 |
|       | chr9  | + | 59472470,59485440                   | 59472561,59485508                   | 1 |
|       | chr9  | + | 59478425,59497096                   | 59478576,59497160                   | 5 |
|       | chr9  | + | 59479146,59497325                   | 59479200,59497410                   | 2 |
| 25439 | chr9  | + | 59651691,59636221,59649720          | 59651818,59636321,59649818          | 8 |
| 25449 | chr9  | + | 60715238,60727980                   | 60715291,60728177                   | 1 |
| 25465 | chr9  | - | 62740935,62735114                   | 62741066,62735257                   | 1 |
| 25467 | chr9  | - | 63141502,63045117                   | 63141571,63045179                   | 1 |
| 25476 | chr9  | + | 64023898,64025127                   | 64024023,64025284                   | 1 |
| 25511 | chr9  | + | 65907975,65914101                   | 65908207,65914436                   | 1 |
|       | chr9  | + | 65909273,65913293                   | 65909387,65913478                   | 1 |
| 25514 | chr9  | + | 65986143,65980333,65984108          | 65986775,65980498,65984154          | 1 |
| 25518 | chr9  | + | 66313187,66333873                   | 66313388,66334055                   | 1 |
|       | chr9  | + | 66318044,66333873                   | 66318172,66334055                   | 1 |
| 25522 | chr9  | - | 66623293,66662800                   | 66627187,66667268                   | 1 |
|       | chr9  | - | 66676479,66637452                   | 66676553,66637575                   | 1 |
| 25527 | chr9  | - | 66878835,66875700                   | 66878905,66875974                   | 5 |
|       | chr9  | - | 66878835,66875700,66880600          | 66878905,66875974,66880671          | 1 |
|       | chr9  | - | 66878835,66875700,66880600,66879757 | 66878905,66875974,66880671,66879833 | 2 |
|       | chr9  | - | 66880272,66870399                   | 66880348,66871248                   | 1 |
| 25529 | chr9  | - | 67114583,67103665                   | 67114730,67103851                   | 1 |
|       | chr9  | - | 67152642,67088486                   | 67152786,67088611                   | 1 |
|       | chr9  | - | 67179538,67103665                   | 67179667,67103851                   | 1 |
| 2556  | chr10 | - | 126325025,126324304                 | 126327887,126324750                 | 2 |
| 2564  | chr10 | + | 126500670,126501890                 | 126500815,126502058                 | 1 |
|       | chr10 | + | 126500670,126501890,126502210       | 126500815,126502058,126502320       | 1 |
|       | chr10 | + | 126501275,126503156                 | 126501509,126503292                 | 1 |
| 2565  | chr10 | - | 126505963,126504345                 | 126506044,126505246                 | 1 |
| 2566  | chr10 | + | 126520486,126527482                 | 126520634,126527631                 | 1 |
|       | chr10 | + | 126523982,126527930                 | 126524141,126528153                 | 1 |
| 2567  | chr10 | - | 126556659,126536668                 | 126556723,126536763                 | 1 |
| 2568  | chr10 | + | 126602280,126606799                 | 126602575,126606898                 | 1 |
| 25707 | chr9  | + | 69273463,69276122                   | 69275892,69276381                   | 1 |
| 25712 | chr9  | + | 69864625,69870243                   | 69866028,69870654                   | 1 |
|       | chr9  | + | 69867195,69864625                   | 69867322,69866028                   | 2 |
| 25718 | chr9  | + | 70406843,70439385                   | 70409613,70440039                   | 1 |
|       | chr9  | + | 70409143,70421263                   | 70410668,70421732                   | 6 |
| 2571  | chr10 | - | 126623934,126619584                 | 126624030,126619999                 | 1 |
| 2572  | chr10 | - | 126629664,126627697                 | 126630394,126628609                 | 2 |
| 25737 | chr9  | + | 72510153,72586846                   | 72510420,72586942                   | 1 |
|       | chr9  | + | 72517758,72584473                   | 72517923,72584595                   | 2 |
|       | chr9  | + | 72519036,72587261                   | 72519110,72587335                   | 1 |
| 2573  | chr10 | + | 126632304,126632304,126634192       | 126632580,126632580,126634250       | 1 |
| 25756 | chr9  | + | 74885483,74904441                   | 74885526,74908120                   | 1 |
| 2575  | chr10 | - | 126678986,126674352                 | 126679162,126674470                 | 1 |
|       | chr10 | - | 126683002,126676884                 | 126683058,126676953                 | 1 |
| 25768 | chr9  | - | 75499437,75531441,75509059          | 75499518,75531824,75509197          | 1 |
|       | chr9  | - | 75517021,75499437                   | 75517199,75499518                   | 2 |
|       | chr9  | - | 75530744,75499437                   | 75530797,75499518                   | 1 |
|       | chr9  | - | 75531441,75509059,75491180          | 75531824,75509197,75491751          | 1 |
|       | chr9  | - | 75531441,75509059,75499437,75491180 | 75531824,75509197,75499518,75491751 | 3 |
|       | chr9  | - | 75531441,75509059                   | 75531824,75509197                   | 1 |
| 2576  | chr10 | + | 126703454,126712049                 | 126703590,126712111                 | 2 |
|       | chr10 | + | 126712879,126715175                 | 126712978,126715278                 | 2 |
|       | chr10 | + | 126713439,126714310                 | 126713600,126714376                 | 1 |

|       |       |   |                                         |                                         |   |
|-------|-------|---|-----------------------------------------|-----------------------------------------|---|
|       | chr10 | + | 126714310,126714922                     | 126714376,126714994                     | 1 |
|       | chr10 | + | 126714922,126718456                     | 126714994,126718863                     | 1 |
|       | chr10 | + | 126715175,126718456                     | 126715278,126718863                     | 3 |
| 25776 | chr9  | - | 77021765,76949891,77087198              | 77021810,76950200,77087591              | 1 |
|       | chr9  | - | 77087198,76949891,77087198              | 77087591,76950200,77087591              | 1 |
|       | chr9  | - | 77087198,76949891                       | 77087591,76950200                       | 1 |
|       | chr9  | - | 77087198,77021765,77087198              | 77087591,77021810,77087591              | 1 |
| 25784 | chr9  | + | 77961215,78015406                       | 77961262,78015747                       | 1 |
| 25799 | chr9  | + | 78515045,78548001                       | 78515222,78548167                       | 2 |
| 2579  | chr10 | - | 126747275,126745313                     | 126747354,126745420                     | 1 |
| 25804 | chr9  | + | 79914709,79940073                       | 79915379,79940219                       | 1 |
| 25805 | chr9  | + | 80089971,80129489                       | 80090077,80129567                       | 1 |
| 25813 | chr9  | - | 82789628,82787637                       | 82789979,82787948                       | 3 |
|       | chr9  | - | 82806685,82802297                       | 82807520,82802481                       | 1 |
| 25814 | chr9  | - | 83040037,83003554                       | 83040212,83004036                       | 3 |
| 25832 | chr9  | - | 86462817,86452001,86451109,86449798     | 86463002,86452115,86451232,86449972     | 1 |
| 25834 | chr9  | - | 86544474,86489662                       | 86544636,86489805                       | 1 |
| 25837 | chr9  | - | 86684888,86671867                       | 86684972,86671898                       | 2 |
| 25839 | chr9  | + | 86935216,86937614,86950599              | 86935301,86937708,86950740              | 1 |
| 25844 | chr9  | - | 88315088,88276319                       | 88315167,88276415                       | 1 |
| 25846 | chr9  | - | 88416755,88415890                       | 88416813,88416286                       | 2 |
| 25864 | chr9  | + | 89879103,89899679                       | 89879186,89899740                       | 1 |
| 25867 | chr9  | + | 90086673,90094551                       | 90086800,90094940                       | 1 |
|       | chr9  | + | 90087862,90090514                       | 90089107,90090688                       | 1 |
|       | chr9  | + | 90087862,90090768                       | 90089107,90090915                       | 1 |
| 25882 | chr9  | - | 95389164,95363121                       | 95389208,95363298                       | 2 |
|       | chr9  | - | 95394121,95392742                       | 95394236,95392810                       | 1 |
|       | chr9  | - | 95396253,95379685                       | 95396352,95379773                       | 2 |
| 25897 | chr9  | - | 96453531,96444697                       | 96453605,96444884                       | 1 |
| 2590  | chr10 | - | 126978694,126976527                     | 126978871,126976618                     | 1 |
|       | chr10 | - | 127021668,126977208                     | 127021809,126977383                     | 1 |
|       | chr10 | - | 127049712,127013865                     | 127049835,127014111                     | 1 |
| 25911 | chr9  | + | 98470724,98471912                       | 98470811,98472061                       | 1 |
| 25912 | chr9  | - | 98501891,98490453                       | 98502078,98490562                       | 2 |
| 2591  | chr10 | + | 127085161,127094163                     | 127085245,127094300                     | 1 |
| 25924 | chr9  | - | 99436213,99427309                       | 99436311,99427400                       | 1 |
| 25933 | chr9  | - | 100886197,100884791,100882456           | 100886305,100884891,100883225           | 1 |
|       | chr9  | - | 100895978,100886197                     | 100896099,100886305                     | 1 |
| 25935 | chr9  | - | 101113460,101046640                     | 101115110,101046730                     | 1 |
| 25948 | chr9  | - | 103099867,103093398                     | 103099950,103093453                     | 1 |
| 25961 | chr9  | - | 104077976,104074850                     | 104078093,104074942                     | 1 |
| 25971 | chr9  | - | 105396744,105371436                     | 105396927,105372477                     | 1 |
| 25972 | chr9  | + | 105579072,105588675                     | 105579237,105588784                     | 1 |
| 25974 | chr9  | - | 105660621,105634542                     | 105660693,105634605                     | 1 |
|       | chr9  | - | 105684234,105611420                     | 105684795,105611914                     | 1 |
| 25976 | chr9  | - | 105950045,105927821                     | 105950090,105927884                     | 1 |
|       | chr9  | - | 105952162,105928786                     | 105952189,105928849                     | 1 |
| 25984 | chr9  | - | 106143966,106140405                     | 106144116,106140567                     | 1 |
| 25991 | chr9  | + | 106356220,106365461                     | 106356338,106366338                     | 1 |
|       | chr9  | + | 106362727,106364692                     | 106362760,106364745                     | 1 |
| 25999 | chr9  | - | 106547215,106545425,106547627,106547215 | 106547422,106546472,106547808,106547422 | 5 |
|       | chr9  | - | 106547627,106547215,106547215,106545425 | 106547808,106547422,106547422,106546472 | 2 |
|       | chr9  | - | 106549481,106550435                     | 106550434,106550557                     | 8 |
|       | chr9  | - | 106549481,106552726                     | 106550434,106553564                     | 8 |
| 26002 | chr9  | + | 106767361,106782264                     | 106767435,106782760                     | 1 |
| 26008 | chr9  | - | 107233421,107231654,107230765,107230506 | 107233486,107231763,107230861,107230620 | 1 |
| 26010 | chr9  | + | 107367883,107417481                     | 107368000,107417553                     | 1 |
| 26018 | chr9  | + | 107474388,107473822                     | 107475109,107474294                     | 6 |
| 26026 | chr9  | - | 107518744,107516468                     | 107518874,107517429                     | 1 |
|       | chr9  | - | 107518744,107516900                     | 107518874,107517046                     | 1 |
| 26027 | chr9  | - | 107560324,107559960                     | 107560398,107560042                     | 1 |
| 26030 | chr9  | - | 107654441,107642832                     | 107654529,107643423                     | 1 |
|       | chr9  | - | 107671891,107646167                     | 107671957,107646242                     | 1 |
| 26044 | chr9  | - | 107961993,107959146                     | 107962171,107959286                     | 1 |
|       | chr9  | - | 107981599,107973481                     | 107981656,107973576                     | 1 |
| 26047 | chr9  | - | 107988469,107996557,107989353           | 107988660,107996690,107989434           | 3 |



|       |       |   |                                         |                                         |   |
|-------|-------|---|-----------------------------------------|-----------------------------------------|---|
|       | chr9  | - | 107995311,107992419                     | 107995405,107992517                     | 1 |
|       | chr9  | - | 107996765,107988091                     | 107996782,107988198                     | 1 |
| 26056 | chr9  | + | 108250198,108294009                     | 108250349,108294857                     | 1 |
|       | chr9  | + | 108268160,108294009                     | 108268301,108294857                     | 2 |
| 26063 | chr9  | + | 108395891,108404170                     | 108396194,108404653                     | 1 |
|       | chr9  | + | 108397142,108400453                     | 108397258,108400572                     | 1 |
|       | chr9  | + | 108398141,108401624                     | 108398275,108401841                     | 1 |
|       | chr9  | + | 108403524,108403524,108404170           | 108404030,108404030,108404653           | 1 |
|       | chr9  | + | 108403524,108404170                     | 108404030,108404653                     | 6 |
|       | chr9  | + | 108404170,108403524                     | 108404653,108404030                     | 2 |
| 26064 | chr9  | + | 108413862,108416620                     | 108413949,108416725                     | 1 |
|       | chr9  | + | 108417076,108412618,108416620           | 108417204,108412679,108416725           | 1 |
| 26067 | chr9  | - | 108468886,108468489,108469181,108468886 | 108469082,108468590,108469673,108469082 | 4 |
| 26068 | chr9  | + | 108474723,108474881,108473375,108474517 | 108474792,108475102,108473504,108474628 | 2 |
| 2606  | chr10 | + | 127460640,127464108                     | 127460730,127464194                     | 1 |
|       | chr10 | + | 127460836,127466821                     | 127460975,127467086                     | 1 |
| 26075 | chr9  | + | 108698394,108699537                     | 108698727,108700322                     | 2 |
|       | chr9  | + | 108698394,108700601,108700670,108701572 | 108698727,108700824,108700824,108701748 | 3 |
| 26077 | chr9  | + | 108734008,108749875                     | 108734659,108750076                     | 2 |
| 26078 | chr9  | + | 108761617,108815099                     | 108761687,108815380                     | 1 |
| 26080 | chr9  | + | 108844097,108846734                     | 108844184,108846933                     | 1 |
|       | chr9  | + | 108846088,108848982                     | 108846218,108849098                     | 3 |
|       | chr9  | + | 108846734,108850983                     | 108846933,108851059                     | 1 |
|       | chr9  | + | 108848982,108850983                     | 108849098,108851059                     | 1 |
|       | chr9  | + | 108849380,108849900                     | 108849524,108849986                     | 2 |
| 26081 | chr9  | + | 108864410,108885833                     | 108864557,108885962                     | 2 |
|       | chr9  | + | 108869038,108873603                     | 108869071,108873639                     | 1 |
| 26083 | chr9  | + | 108953692,108957424,108958491,108958800 | 108953742,108957521,108958607,108959019 | 1 |
| 26085 | chr9  | - | 108963623,108971792,108964045           | 108963715,108971911,108964182           | 5 |
| 26088 | chr9  | + | 109005340,109014776                     | 109005441,109014843                     | 1 |
|       | chr9  | + | 109008954,109015797                     | 109009127,109015966                     | 1 |
| 2609  | chr10 | + | 127520362,127521352                     | 127520509,127521527                     | 1 |
|       | chr10 | + | 127523353,127526012                     | 127523476,127526214                     | 2 |
| 26104 | chr9  | + | 109742121,109744440,109744965           | 109742224,109744601,109745475           | 4 |
| 26106 | chr9  | + | 109778082,109778809                     | 109778663,109779738                     | 1 |
| 26107 | chr9  | + | 109834367,109975116                     | 109834444,109975209                     | 1 |
|       | chr9  | + | 109971027,109965520,109969988           | 109971087,109965627,109970172           | 1 |
| 26108 | chr9  | - | 109994819,109986823                     | 109994940,109987150                     | 1 |
|       | chr9  | - | 109999592,109987453                     | 109999703,109987557                     | 1 |
|       | chr9  | - | 110001232,109988623                     | 110001363,109988830                     | 1 |
| 26109 | chr9  | + | 110085425,110089261                     | 110085547,110089415                     | 3 |
| 2610  | chr10 | + | 127556010,127562324                     | 127556076,127562457                     | 1 |
| 26110 | chr9  | + | 110148798,110158648                     | 110149894,110158724                     | 1 |
| 26112 | chr9  | + | 110286569,110287059                     | 110286650,110287450                     | 2 |
| 26113 | chr9  | - | 110310537,110291515                     | 110310714,110291667                     | 1 |
| 26117 | chr9  | + | 110474450,110494905                     | 110474570,110495083                     | 1 |
| 26131 | chr9  | + | 1107991410,110800190                    | 110799183,110800340                     | 1 |
| 26137 | chr9  | + | 111063806,111095544                     | 111063893,111095622                     | 5 |
|       | chr9  | + | 111063806,111126453                     | 111063893,111127829                     | 1 |
|       | chr9  | + | 111108258,111116316,111102168           | 111108351,111116418,111102339           | 1 |
|       | chr9  | + | 111108258,111116316,111116644           | 111108351,111116418,111116777           | 2 |
|       | chr9  | + | 111118432,111124661,111126453           | 111118482,111124741,111127829           | 1 |
| 26144 | chr9  | - | 112045812,112029782                     | 112046042,112029964                     | 1 |
|       | chr9  | - | 112051838,112038957                     | 112051876,112039185                     | 1 |
|       | chr9  | - | 112060193,111969664                     | 112060302,111969813                     | 1 |
|       | chr9  | - | 112090093,112063441                     | 112090270,112064137                     | 1 |
|       | chr9  | - | 112134838,111967761                     | 112134931,111968526                     | 1 |
|       | chr9  | - | 112136813,112028938                     | 112137522,112029043                     | 3 |
| 26149 | chr9  | - | 113617016,113564050                     | 113617225,113564225                     | 1 |
| 26151 | chr9  | + | 113865824,113881868                     | 113865931,113882011                     | 1 |
|       | chr9  | + | 113875352,113878443,113881868           | 113875407,113878534,113882011           | 1 |
| 26158 | chr9  | - | 114284255,114290703,114287157           | 114284700,114290832,114287241           | 1 |
| 26163 | chr9  | - | 114504954,114502554                     | 114507953,114502630                     | 4 |
| 26164 | chr9  | + | 114597948,114629666                     | 114598145,114629787                     | 2 |
|       | chr9  | + | 114624717,114630822                     | 114624829,114630975                     | 1 |
| 2616  | chr10 | + | 127683141,127687749                     | 127683267,127687868                     | 1 |

|       |       |   |                                     |                                     |   |
|-------|-------|---|-------------------------------------|-------------------------------------|---|
|       | chr10 | + | 127687340,127687749                 | 127687518,127687868                 | 1 |
| 26185 | chr9  | + | 118447994,118478081                 | 118448142,118478157                 | 1 |
| 26221 | chr9  | + | 120401758,120404030                 | 120401959,120404445                 | 1 |
| 26225 | chr9  | + | 120860384,120866876                 | 120860623,120866998                 | 2 |
| 26226 | chr9  | - | 121169126,121113841                 | 121169202,121113925                 | 1 |
| 26227 | chr9  | + | 121352743,121363396                 | 121352852,121364155                 | 1 |
|       | chr9  | + | 121360768,121378102                 | 121360845,121378205                 | 1 |
| 2622  | chr10 | + | 127760385,127763119                 | 127760498,127763323                 | 1 |
| 26234 | chr9  | + | 121661524,121663362                 | 121661581,121665959                 | 1 |
| 26238 | chr9  | - | 121706747,121709620                 | 121707357,121709769                 | 1 |
| 26257 | chr9  | + | 122880806,122900978                 | 122880904,122901120                 | 1 |
|       | chr9  | + | 122880806,122926704                 | 122880904,122926836                 | 1 |
| 26260 | chr9  | - | 122998149,122989468                 | 122998274,122989599                 | 1 |
| 2627  | chr10 | - | 127845753,127845209                 | 127845892,127845276                 | 1 |
| 2628  | chr10 | + | 127865646,127874363                 | 127865759,127874467                 | 1 |
|       | chr10 | + | 127876568,127875138                 | 127878496,127876474                 | 7 |
| 2629  | chr10 | + | 127896349,127902492                 | 127896493,127902562                 | 1 |
|       | chr10 | + | 127902492,127925951                 | 127902562,127927228                 | 1 |
|       | chr10 | + | 127911256,127920230                 | 127911316,127920392                 | 1 |
|       | chr10 | + | 127919739,127921134                 | 127919998,127921270                 | 2 |
|       | chr10 | + | 127920646,127924989                 | 127920711,127925073                 | 1 |
| 262   | chr1  | - | 53409373,53401487                   | 53409543,53401823                   | 3 |
| 2632  | chr10 | - | 127933308,127931212                 | 127933452,127931539                 | 2 |
| 26395 | chrX  | + | 7389957,7396292                     | 7390057,7396447                     | 1 |
| 26397 | chrX  | + | 7419207,7451358                     | 7419594,7453066                     | 1 |
| 26399 | chrX  | + | 7466737,7471316,7462874             | 7466889,7471618,7463057             | 2 |
|       | chrX  | + | 7469265,7471316                     | 7471153,7471618                     | 3 |
| 26400 | chrX  | - | 7473118,7472290                     | 7473231,7472354                     | 1 |
| 26417 | chrX  | - | 7823852,7822185                     | 7823906,7822227                     | 2 |
| 26438 | chrX  | - | 9046331,9012623                     | 9046393,9014352                     | 1 |
| 26442 | chrX  | + | 9482643,9565676                     | 9482853,9565812                     | 1 |
| 26443 | chrX  | - | 9755396,9739727                     | 9755462,9739816                     | 2 |
| 26445 | chrX  | + | 10159290,10167261                   | 10159365,10173728                   | 1 |
|       | chrX  | + | 10162622,10172755                   | 10162778,10173730                   | 2 |
| 26450 | chrX  | + | 12181992,12185960                   | 12182088,12186080                   | 1 |
|       | chrX  | + | 12182243,12192807                   | 12182381,12194091                   | 1 |
| 26452 | chrX  | - | 12322871,12300908                   | 12323022,12300987                   | 1 |
| 2645  | chr10 | + | 128155113,128156940,128152982       | 128155198,128157294,128153606       | 1 |
| 26466 | chrX  | + | 16235693,16239442,16241776          | 16235798,16239584,16241926          | 1 |
|       | chrX  | + | 16241776,16254680                   | 16241926,16254734                   | 1 |
| 26486 | chrX  | + | 20245574,20259503                   | 20245691,20260305                   | 1 |
|       | chrX  | + | 20245817,20259503                   | 20245876,20260305                   | 3 |
|       | chrX  | + | 20247669,20256718                   | 20247760,20256908                   | 1 |
|       | chrX  | + | 20248815,20258233                   | 20248962,20258326                   | 1 |
|       | chrX  | + | 20248815,20258448                   | 20248962,20258640                   | 1 |
|       | chrX  | + | 20248815,20259503                   | 20248962,20260305                   | 1 |
|       | chrX  | + | 20249560,20259234                   | 20249641,20259335                   | 1 |
|       | chrX  | + | 20255714,20259028                   | 20255910,20259130                   | 7 |
| 26487 | chrX  | + | 20265618,20274047                   | 20265932,20274090                   | 1 |
|       | chrX  | + | 20270449,20274245                   | 20270657,20274336                   | 2 |
|       | chrX  | + | 20271032,20275734                   | 20271297,20277003                   | 2 |
|       | chrX  | + | 20271757,20275576                   | 20271872,20275654                   | 1 |
|       | chrX  | + | 20272824,20275576                   | 20272887,20275654                   | 3 |
| 26488 | chrX  | + | 20291139,20291978                   | 20291298,20292062                   | 1 |
|       | chrX  | + | 20293872,20295119                   | 20294930,20295398                   | 5 |
| 26489 | chrX  | + | 20428783,20437104                   | 20428938,20437644                   | 1 |
| 26490 | chrX  | - | 20442080,20440308                   | 20442155,20440396                   | 1 |
|       | chrX  | - | 20442244,20439624                   | 20442387,20440216                   | 1 |
| 2652  | chr10 | + | 128288212,128309476                 | 128288238,128309566                 | 1 |
| 26554 | chrX  | + | 33587048,33602275                   | 33587264,33602422                   | 1 |
|       | chrX  | + | 33616093,33510031,33616093          | 33616557,33510244,33616557          | 4 |
| 26556 | chrX  | + | 33736773,33737315,33735982,33736503 | 33736901,33739145,33736007,33736562 | 3 |
|       | chrX  | + | 33737315,33735982,33736503          | 33739145,33736007,33736562          | 2 |
| 26561 | chrX  | + | 34336837,34338381                   | 34337324,34338801                   | 2 |
| 26565 | chrX  | - | 34460363,34452239                   | 34460408,34453249                   | 2 |
|       | chrX  | - | 34470093,34515057,34474378          | 34470262,34515172,34474475          | 1 |

|       |      |   |                               |                               |   |
|-------|------|---|-------------------------------|-------------------------------|---|
| 26569 | chrX | - | 34648909,34642021             | 34649016,34642132             | 1 |
| 26572 | chrX | - | 34730983,34727583             | 34731233,34727736             | 1 |
| 26604 | chrX | - | 35758240,35772685             | 35758748,35775028             | 1 |
| 26610 | chrX | + | 38941640,38949795             | 38941802,38949903             | 1 |
| 26614 | chrX | + | 39590127,39619262             | 39590231,39619452             | 2 |
|       | chrX | + | 39600355,39612531             | 39600445,39612680             | 1 |
| 26622 | chrX | - | 45176541,45162546,45176541    | 45176754,45163297,45176754    | 1 |
|       | chrX | - | 45176541,45162546             | 45176754,45163297             | 2 |
|       | chrX | - | 45204821,45162546             | 45204970,45163297             | 1 |
| 26631 | chrX | - | 45838634,45828739             | 45838711,45828936             | 1 |
| 26647 | chrX | - | 47908921,47912843             | 47909106,47914183             | 3 |
|       | chrX | - | 47912843,47908921             | 47914183,47909106             | 3 |
| 26661 | chrX | + | 50361829,50373281             | 50361895,50373328             | 1 |
| 26672 | chrX | - | 51019397,51018443             | 51019755,51018580             | 2 |
| 26702 | chrX | - | 54639206,54636526             | 54641320,54637738             | 3 |
|       | chrX | - | 54639206,54638309             | 54641320,54638398             | 2 |
| 26709 | chrX | - | 56379070,56503975             | 56379174,56504143             | 1 |
|       | chrX | - | 56820316,56379070             | 56820525,56379174             | 9 |
| 26717 | chrX | + | 58387887,58375186             | 58387971,58375334             | 1 |
|       | chrX | + | 58387887,58392397             | 58387971,58392635             | 1 |
| 26755 | chrX | + | 70198181,70202620             | 70198310,70203867             | 1 |
| 26775 | chrX | + | 70774280,70796792             | 70774538,70797004             | 1 |
| 26777 | chrX | - | 70903058,70902569,70902250    | 70903182,70902682,70902338    | 3 |
|       | chrX | - | 70905005,70902008             | 70905063,70902153             | 2 |
| 26778 | chrX | + | 70921988,70923974             | 70922760,70924109             | 1 |
|       | chrX | + | 70925257,70925843             | 70925386,70926014             | 1 |
| 26783 | chrX | - | 71025912,71024804             | 71026046,71024865             | 1 |
|       | chrX | - | 71027636,71027015,71026236    | 71027648,71027128,71026369    | 9 |
| 26784 | chrX | + | 71035138,71035992             | 71035213,71036161             | 4 |
| 26786 | chrX | - | 71106386,71100990             | 71106543,71101002             | 2 |
| 26791 | chrX | - | 71204461,71191462             | 71204622,71191648             | 1 |
| 26797 | chrX | - | 71473659,71468799             | 71473863,71469316             | 2 |
|       | chrX | - | 71479501,71473659             | 71479625,71473863             | 1 |
|       | chrX | - | 71486441,71470736             | 71486642,71470913             | 1 |
|       | chrX | - | 71486441,71480694             | 71486642,71480868             | 1 |
| 26798 | chrX | + | 71500791,71502345             | 71500869,71503086             | 1 |
|       | chrX | + | 71502345,71506120,71502345    | 71503086,71506887,71503086    | 4 |
| 26799 | chrX | + | 71517517,71518253             | 71517656,71518465             | 1 |
| 26802 | chrX | + | 71528100,71533357,71534443    | 71528455,71533438,71534521    | 1 |
| 26805 | chrX | + | 71555301,71556125             | 71555473,71557198             | 1 |
| 26806 | chrX | + | 71560765,71563706             | 71560911,71563783             | 3 |
| 26833 | chrX | - | 73044733,73036300             | 73044829,73036425             | 1 |
| 26853 | chrX | + | 80288534,81048644             | 80288817,81048857             | 4 |
| 26876 | chrX | - | 90818446,90725817             | 90818571,90725949             | 1 |
| 26877 | chrX | + | 90951896,90977015             | 90952013,90977158             | 1 |
| 26885 | chrX | - | 91782632,91781198             | 91782695,91781584             | 3 |
|       | chrX | - | 91782880,91781198             | 91782923,91781584             | 1 |
|       | chrX | - | 91783522,91782212             | 91783602,91782327             | 2 |
|       | chrX | - | 91785193,91783783             | 91785886,91783847             | 1 |
|       | chrX | - | 91786589,91781198,91781198    | 91786663,91781584,91781584    | 1 |
| 26886 | chrX | + | 91886264,91881407             | 91886927,91883900             | 2 |
| 26928 | chrX | - | 98409739,98407300             | 98409819,98409203             | 1 |
| 26932 | chrX | + | 98470830,98484469             | 98470990,98484581             | 1 |
| 26935 | chrX | - | 98606551,98602543             | 98606698,98602798             | 1 |
|       | chrX | - | 98607716,98601243             | 98607814,98601358             | 2 |
| 26938 | chrX | + | 98737802,98751860             | 98738021,98752010             | 1 |
|       | chrX | + | 98742306,98757412             | 98742474,98757626             | 1 |
|       | chrX | + | 98743271,98752162             | 98743399,98752282             | 1 |
| 26965 | chrX | + | 100689133,100688896           | 100689286,100689039           | 1 |
| 26969 | chrX | - | 101016693,100896830           | 101017327,100897059           | 1 |
| 26985 | chrX | - | 103027785,102998028           | 103027916,102998154           | 2 |
|       | chrX | - | 103046775,103046775,103026186 | 103047406,103047406,103026359 | 1 |
| 27010 | chrX | + | 106345253,106355468           | 106345439,106357806           | 1 |
| 27024 | chrX | + | 110928451,110933557           | 110928600,110933623           | 2 |
|       | chrX | + | 110949007,110931231,110949007 | 110949995,110931378,110949995 | 6 |
| 27045 | chrX | - | 130429037,130425608           | 130429121,130426462           | 1 |

|       |       |   |                                         |                                         |    |
|-------|-------|---|-----------------------------------------|-----------------------------------------|----|
| 27085 | chrX  | - | 132601104,132602589,132601104           | 132601746,132602649,132601746           | 1  |
| 27090 | chrX  | - | 132749875,132748510                     | 132750052,132749122                     | 2  |
| 27101 | chrX  | - | 133274343,133267489,133267489           | 133274433,133269040,133269040           | 10 |
|       | chrX  | - | 133274343,133267489                     | 133274433,133269040                     | 2  |
| 27107 | chrX  | - | 133491273,133489528,133508560,133491273 | 133491378,133490021,133508778,133491378 | 1  |
|       | chrX  | - | 133508560,133491273,133491273           | 133508778,133491378,133491378           | 1  |
|       | chrX  | - | 133509936,133489528                     | 133510041,133490021                     | 10 |
| 27124 | chrX  | - | 136357384,136356442                     | 136357952,136357367                     | 3  |
| 27138 | chrX  | + | 138052660,138091227                     | 138052811,138091413                     | 2  |
| 27149 | chrX  | + | 140105555,140169799                     | 140105586,140169965                     | 1  |
| 27169 | chrX  | - | 146893504,146832317                     | 146893694,146833459                     | 1  |
| 27174 | chrX  | - | 147244886,147242114                     | 147244966,147242229                     | 1  |
|       | chrX  | - | 147247213,147244886                     | 147247280,147244966                     | 2  |
|       | chrX  | - | 147248771,147244245                     | 147248825,147244340                     | 1  |
| 27177 | chrX  | + | 147506715,147520173                     | 147506872,147520204                     | 1  |
| 27184 | chrX  | + | 148269766,148336041                     | 148269835,148336224                     | 1  |
|       | chrX  | + | 148338896,148366281                     | 148339045,148366399                     | 1  |
|       | chrX  | + | 148346751,148365006                     | 148346797,148365112                     | 1  |
|       | chrX  | + | 148350583,148363305                     | 148350714,148363423                     | 1  |
|       | chrX  | + | 148351368,148358021                     | 148351583,148358149                     | 1  |
|       | chrX  | + | 148363886,148365006                     | 148364027,148365112                     | 1  |
| 27187 | chrX  | + | 148450970,148468241                     | 148451183,148468427                     | 1  |
|       | chrX  | + | 148460780,148482400                     | 148460984,148482511                     | 1  |
|       | chrX  | + | 148470644,148493321                     | 148470791,148493478                     | 1  |
|       | chrX  | + | 148493900,148495835                     | 148494055,148495946                     | 1  |
| 27188 | chrX  | + | 148578810,148615539                     | 148579722,148615635                     | 5  |
|       | chrX  | + | 148578810,148628408                     | 148579722,148629144                     | 1  |
|       | chrX  | + | 148601476,148628408                     | 148601506,148629144                     | 1  |
| 27189 | chrX  | + | 148704894,148707251                     | 148705074,148708338                     | 1  |
| 27199 | chrX  | + | 149575906,149606404                     | 149575940,149606486                     | 1  |
|       | chrX  | + | 149582994,149597620                     | 149583078,149597712                     | 1  |
| 271   | chr1  | - | 55056470,55044782                       | 55056596,55044999                       | 1  |
|       | chr1  | - | 55063014,55057085,55063014              | 55063227,55057231,55063227              | 1  |
|       | chr1  | - | 55064323,55057855                       | 55064561,55057942                       | 1  |
| 27204 | chrX  | + | 150160247,150175582,150158132           | 150160384,150175807,150158480           | 2  |
|       | chrX  | + | 150160247,150175582                     | 150160384,150175807                     | 6  |
|       | chrX  | + | 150175582,150160247,150175582           | 150175807,150160384,150175807           | 10 |
| 27231 | chrX  | - | 154344601,154310036                     | 154344813,154310085                     | 1  |
|       | chrX  | - | 154344601,154326329,154310036           | 154344813,154326544,154310085           | 1  |
|       | chrX  | - | 154344601,154326329,154326329           | 154344813,154326544,154326544           | 1  |
| 27235 | chrX  | + | 155927208,155930255                     | 155927431,155930343                     | 1  |
|       | chrX  | + | 155928611,155930255,155930829           | 155928716,155930343,155931016           | 1  |
| 27250 | chrX  | + | 159216279,159213667,159216279           | 159217022,159213725,159217022           | 1  |
| 27253 | chrX  | + | 159340115,159467698                     | 159340312,159467810                     | 1  |
|       | chrX  | + | 159365336,159437993                     | 159365488,159438090                     | 1  |
|       | chrX  | + | 159365336,159448993                     | 159365488,159449138                     | 1  |
| 27258 | chrX  | - | 160396205,160392305                     | 160396530,160392414                     | 1  |
| 27274 | chrX  | + | 162804959,162813564                     | 162805106,162813721                     | 1  |
| 2727  | chr11 | + | 3199036,3189871                         | 3199208,3195432                         | 3  |
| 27287 | chrX  | + | 165736352,165740248                     | 165736401,165742367                     | 1  |
| 27288 | chrX  | - | 165620416,165614045                     | 165620461,165614158                     | 1  |
| 27291 | chrX  | + | 166364885,166426794                     | 166365487,166427361                     | 1  |
| 27305 | chrY  | + | 258116,274255                           | 258279,274614                           | 2  |
| 27306 | chrY  | + | 348490,351076,352499                    | 348612,351235,352634                    | 1  |
| 2731  | chr11 | - | 3255813,3243299                         | 3255919,3245887                         | 1  |
| 2739  | chr11 | - | 3539796,3543270                         | 3543182,3545526                         | 1  |
| 2740  | chr11 | + | 3581677,3584616                         | 3581810,3584748                         | 1  |
| 2752  | chr11 | + | 4037214,4039741                         | 4037371,4040081                         | 4  |
| 2754  | chr11 | + | 4060370,4067635                         | 4060553,4067893                         | 1  |
| 2768  | chr11 | + | 4784024,4793122                         | 4784119,4794203                         | 1  |
|       | chr11 | + | 4788882,4789535                         | 4788953,4789567                         | 1  |
|       | chr11 | + | 4789535,4789894,4784024,4789099         | 4789567,4789989,4784119,4789240         | 2  |
| 2771  | chr11 | + | 4915608,4925596                         | 4915744,4925712                         | 1  |
|       | chr11 | + | 4937634,4941720                         | 4937780,4942732                         | 1  |
| 2776  | chr11 | - | 5016882,5006268,5006268                 | 5016927,5006972,5006972                 | 2  |
|       | chr11 | - | 5029430,5029011,5010692,5009546         | 5029483,5029074,5010777,5009637         | 1  |

|      |       |   |                            |                            |    |
|------|-------|---|----------------------------|----------------------------|----|
| 2785 | chr11 | + | 5680208,5680208,5683894    | 5681879,5681879,5684713    | 1  |
| 2794 | chr11 | - | 5892822,5888103            | 5892895,5888146            | 4  |
|      | chr11 | - | 5900207,5889576            | 5900452,5889671            | 1  |
| 2798 | chr11 | - | 6162459,6157547            | 6162549,6159261            | 1  |
|      | chr11 | - | 6164126,6162459            | 6164240,6162549            | 1  |
|      | chr11 | - | 6165514,6161618            | 6165759,6161724            | 2  |
| 2800 | chr11 | + | 6224880,6247831            | 6224925,6247934            | 1  |
| 2801 | chr11 | + | 6297031,6303122            | 6297292,6303367            | 1  |
| 2808 | chr11 | + | 6469966,6485036            | 6470140,6485220            | 1  |
|      | chr11 | + | 6493604,6469966,6490755    | 6493743,6470140,6490891    | 1  |
| 2809 | chr11 | - | 6498271,6499378,6498883    | 6498415,6502921,6498955    | 1  |
|      | chr11 | - | 6498502,6498007            | 6498649,6498130            | 2  |
| 2815 | chr11 | + | 6978890,7066242            | 6979040,7066292            | 1  |
| 2854 | chr11 | - | 17852254,17839894          | 17852331,17840353          | 1  |
| 2861 | chr11 | + | 20123086,20124650          | 20123182,20126859          | 3  |
| 2870 | chr11 | - | 21270189,21223201          | 21270478,21223306          | 4  |
|      | chr11 | - | 21271017,21228873          | 21271204,21229116          | 1  |
| 2872 | chr11 | - | 21459701,21456789          | 21459878,21457571          | 7  |
|      | chr11 | - | 21465826,21459194          | 21465923,21459308          | 1  |
| 2882 | chr11 | + | 22895929,22901361          | 22896038,22901472          | 1  |
|      | chr11 | + | 22895929,22902816          | 22896038,22902930          | 2  |
|      | chr11 | + | 22896314,22902166          | 22896457,22902401          | 3  |
|      | chr11 | + | 22897032,22899032          | 22897154,22899876          | 1  |
|      | chr11 | + | 22902166,22903136,22902166 | 22902401,22903336,22902401 | 1  |
| 2884 | chr11 | + | 23185800,23194595          | 23185935,23194692          | 4  |
| 2885 | chr11 | + | 23206894,23243510          | 23207016,23243660          | 1  |
| 2888 | chr11 | + | 23349212,23357797          | 23349293,23357846          | 1  |
| 2897 | chr11 | + | 23985320,24072698,24072698 | 23985650,24073194,24073194 | 1  |
|      | chr11 | + | 24063145,24072698          | 24067330,24073194          | 5  |
|      | chr11 | + | 24072698,24063145          | 24073194,24067330          | 1  |
| 2902 | chr11 | + | 26368334,26359685          | 26369124,26359836          | 1  |
| 2908 | chr11 | + | 29034599,29055714          | 29034705,29055798          | 1  |
|      | chr11 | + | 29059324,29061327          | 29059403,29061828          | 3  |
| 2911 | chr11 | + | 29300183,29407694          | 29300292,29410811          | 1  |
|      | chr11 | + | 29365610,29382597          | 29365738,29382741          | 1  |
|      | chr11 | + | 29365610,29403382          | 29365738,29403651          | 1  |
| 2920 | chr11 | - | 30038363,30001612          | 30038501,30001655          | 1  |
|      | chr11 | - | 30043018,30014675          | 30043177,30014920          | 1  |
| 2937 | chr11 | + | 32105414,32108333,32105414 | 32105663,32108408,32105663 | 2  |
| 2971 | chr11 | - | 35639488,35633375          | 35639610,35633480          | 1  |
|      | chr11 | - | 35639978,35633375          | 35640079,35633480          | 3  |
| 2976 | chr11 | - | 40498987,40498728          | 40501297,40498843          | 1  |
| 2985 | chr11 | + | 43010938,43047864          | 43011070,43047941          | 1  |
| 2994 | chr11 | - | 43552298,43543507          | 43552335,43544109          | 1  |
| 300  | chr1  | + | 58460458,58461878          | 58460597,58463392          | 3  |
| 301  | chr1  | - | 58478617,58471215          | 58478778,58471345          | 1  |
|      | chr1  | - | 58480763,58468843          | 58480932,58469184          | 1  |
| 3022 | chr11 | + | 48615774,48617359          | 48615922,48617470          | 14 |
|      | chr11 | + | 48616905,48617657          | 48617001,48617798          | 3  |
| 3061 | chr11 | + | 49780838,49792996          | 49780928,49793725          | 1  |
| 3064 | chr11 | + | 49988352,50010445          | 49988453,50010594          | 1  |
| 3065 | chr11 | - | 50013653,50016315,50013653 | 50014449,50016536,50014449 | 1  |
|      | chr11 | - | 50016315,50013653,50016315 | 50016536,50014449,50016536 | 1  |
|      | chr11 | - | 50019524,50013653          | 50019605,50014449          | 1  |
| 3066 | chr11 | + | 50039134,50047911          | 50039241,50048024          | 1  |
|      | chr11 | + | 50045525,50048107          | 50045639,50048152          | 3  |
|      | chr11 | + | 50046065,50047584          | 50046180,50047663          | 1  |
| 3072 | chr11 | + | 50192969,50197332          | 50193125,50197422          | 3  |
|      | chr11 | + | 50193322,50196038,50192969 | 50193466,50196217,50193125 | 1  |
| 3073 | chr11 | - | 50202804,50235131,50205520 | 50203460,50235305,50205569 | 1  |
|      | chr11 | - | 50211145,50202804          | 50211275,50203460          | 1  |
|      | chr11 | - | 50244285,50229741          | 50244613,50229803          | 1  |
| 3074 | chr11 | + | 50415586,50606147          | 50415801,50606355          | 1  |
| 3093 | chr11 | - | 51418160,51413601          | 51418319,51414980          | 5  |
|      | chr11 | - | 51420168,51418962          | 51420383,51419131          | 1  |
| 30   | chr1  | + | 10055403,10075827          | 10055502,10076033          | 2  |

|      |       |   |                                     |                                     |    |
|------|-------|---|-------------------------------------|-------------------------------------|----|
| 3100 | chr11 | + | 51596273,51604828                   | 51596339,51605423                   | 1  |
| 3104 | chr11 | + | 51817755,51847015                   | 51817829,51847113                   | 1  |
|      | chr11 | + | 51849448,51897872                   | 51849522,51898611                   | 1  |
| 3105 | chr11 | + | 51926621,51932644                   | 51926831,51932806                   | 5  |
| 3109 | chr11 | + | 52056088,52058482,52045510          | 52056162,52058623,52045620          | 1  |
| 3112 | chr11 | + | 52190149,52201933                   | 52190202,52202898                   | 1  |
| 3115 | chr11 | - | 53076381,53073315                   | 53076501,53075317                   | 1  |
|      | chr11 | - | 53081991,53079425                   | 53082087,53079551                   | 1  |
|      | chr11 | - | 53097030,53076381                   | 53097164,53076501                   | 1  |
| 3127 | chr11 | + | 53392601,53408327                   | 53392686,53408453                   | 1  |
|      | chr11 | + | 53400336,53406896,53407420          | 53400432,53407032,53407601          | 1  |
| 3130 | chr11 | - | 53512323,53488199                   | 53512509,53488313                   | 1  |
| 3141 | chr11 | + | 54148553,54166492                   | 54148627,54166564                   | 1  |
| 3151 | chr11 | - | 54742596,54731301                   | 54742720,54731427                   | 1  |
| 3152 | chr11 | - | 54817480,54795117                   | 54817539,54795240                   | 1  |
|      | chr11 | - | 54822611,54805788                   | 54822702,54805868                   | 2  |
| 3161 | chr11 | - | 55233289,55215452                   | 55233367,55215573                   | 1  |
| 3168 | chr11 | + | 57140944,57102749,57140944          | 57143746,57102997,57143746          | 1  |
| 3169 | chr11 | - | 57318735,57306505,57320338          | 57318859,57306628,57320497          | 1  |
|      | chr11 | - | 57327137,57322879                   | 57327237,57322968                   | 1  |
| 3230 | chr11 | + | 59016018,59018036                   | 59016161,59018259                   | 1  |
| 3245 | chr11 | + | 59510459,59585118                   | 59510525,59585204                   | 1  |
|      | chr11 | + | 59549331,59583385                   | 59549566,59583548                   | 1  |
| 3250 | chr11 | - | 59639791,59634801                   | 59639932,59634888                   | 2  |
| 3251 | chr11 | + | 59689306,59692837,59689306          | 59690035,59694470,59690035          | 7  |
| 3258 | chr11 | - | 60014747,60012590                   | 60014913,60013653                   | 1  |
|      | chr11 | - | 60017888,60015660                   | 60018103,60015763                   | 1  |
| 3263 | chr11 | + | 60245834,60251944                   | 60245942,60252075                   | 1  |
| 3265 | chr11 | + | 60317060,60323035                   | 60317181,60323214                   | 2  |
| 3268 | chr11 | - | 60528532,60527650                   | 60528638,60527949                   | 1  |
|      | chr11 | - | 60538659,60529906                   | 60538770,60530046                   | 1  |
| 3269 | chr11 | + | 60544417,60543784,60544417          | 60546453,60543937,60546453          | 3  |
| 326  | chr1  | + | 59763846,59768114                   | 59763908,59768354                   | 1  |
| 3286 | chr11 | - | 61265514,61263691                   | 61265643,61263745                   | 1  |
| 3289 | chr11 | + | 61322573,61326153                   | 61322670,61326429                   | 1  |
| 3295 | chr11 | - | 61654800,61597038                   | 61654833,61597217                   | 1  |
| 3297 | chr11 | + | 61945331,61961069                   | 61945405,61961170                   | 1  |
| 32   | chr1  | - | 10151043,10137483                   | 10151084,10137616                   | 1  |
|      | chr1  | - | 10173743,10146994                   | 10173828,10147125                   | 1  |
| 3301 | chr11 | - | 62168072,62134497                   | 62168190,62134719                   | 1  |
|      | chr11 | - | 62204480,62182795                   | 62204535,62182925                   | 1  |
| 3303 | chr11 | - | 62349783,62340993                   | 62349882,62341108                   | 1  |
| 3306 | chr11 | + | 62416736,62417904                   | 62416784,62417968                   | 1  |
| 3356 | chr11 | + | 68344923,68346967                   | 68346721,68347382                   | 1  |
| 3365 | chr11 | + | 68784225,68785170                   | 68785121,68785305                   | 1  |
|      | chr11 | + | 68785170,68784225                   | 68785305,68785121                   | 1  |
| 3368 | chr11 | + | 68839952,68847460,68848136,68848385 | 68840081,68847538,68848281,68848450 | 1  |
|      | chr11 | + | 68841105,68844601                   | 68841283,68844691                   | 1  |
| 3381 | chr11 | + | 69143825,69143684                   | 69143985,69143728                   | 1  |
| 3384 | chr11 | - | 69166048,69160119                   | 69166226,69160315                   | 1  |
|      | chr11 | - | 69169132,69167563                   | 69169274,69167688                   | 1  |
|      | chr11 | - | 69170866,69165601                   | 69171067,69165667                   | 1  |
|      | chr11 | - | 69173328,69156774                   | 69173540,69157980                   | 1  |
|      | chr11 | - | 69175537,69162422                   | 69175824,69162558                   | 1  |
|      | chr11 | - | 69177474,69160119                   | 69177645,69160315                   | 1  |
|      | chr11 | - | 69182637,69177121                   | 69182928,69177246                   | 1  |
| 3388 | chr11 | - | 69215016,69213441                   | 69215165,69213612                   | 2  |
|      | chr11 | - | 69221527,69227034,69221759          | 69221669,69227175,69221903          | 3  |
| 3391 | chr11 | - | 69391127,69375895                   | 69391239,69375999                   | 2  |
|      | chr11 | - | 69391948,69377360                   | 69392047,69377449                   | 1  |
| 3392 | chr11 | + | 69402642,69404755                   | 69402752,69405299                   | 1  |
| 3395 | chr11 | + | 69436208,69436992                   | 69436292,69437371                   | 1  |
|      | chr11 | + | 69436361,69436992                   | 69436960,69437371                   | 11 |
| 3398 | chr11 | - | 69472067,69470205                   | 69472200,69470830                   | 1  |
|      | chr11 | - | 69472067,69471226,69470921          | 69472200,69471345,69471032          | 2  |
|      | chr11 | - | 69472067,69471226,69475970          | 69472200,69471345,69476144          | 1  |

|      |       |   |                                     |                                     |   |
|------|-------|---|-------------------------------------|-------------------------------------|---|
| 3399 | chr11 | - | 69479521,69478748,69478252          | 69479564,69478868,69478423          | 1 |
| 3419 | chr11 | + | 69723049,69724527                   | 69723214,69724615                   | 1 |
|      | chr11 | + | 69724236,69725430                   | 69724416,69725596                   | 2 |
| 3420 | chr11 | + | 69728253,69728640                   | 69728363,69728720                   | 1 |
| 3425 | chr11 | - | 69788541,69782597                   | 69788762,69782698                   | 1 |
|      | chr11 | - | 69788541,69782994,69781726          | 69788762,69783090,69782042          | 1 |
|      | chr11 | - | 69793331,69784062                   | 69793412,69784244                   | 1 |
|      | chr11 | - | 69794708,69784062                   | 69794754,69784244                   | 1 |
| 3427 | chr11 | + | 69805866,69807960                   | 69805945,69808448                   | 2 |
| 3430 | chr11 | - | 69827980,69823693                   | 69828045,69823938                   | 1 |
| 3431 | chr11 | + | 69844096,69844368,69832365,69844105 | 69844156,69844493,69832451,69844156 | 1 |
|      | chr11 | + | 69844590,69853248                   | 69844760,69853363                   | 1 |
|      | chr11 | + | 69844856,69852985,69853248          | 69844993,69853088,69853363          | 1 |
|      | chr11 | + | 69858090,69856072,69857777          | 69858270,69856245,69857869          | 5 |
| 3439 | chr11 | - | 70050378,70048707                   | 70050480,70048970                   | 1 |
|      | chr11 | - | 70051032,70049525,70048709          | 70051127,70049713,70048966          | 1 |
| 3446 | chr11 | + | 70254257,70253665                   | 70254330,70254176                   | 6 |
| 3454 | chr11 | + | 70367778,70370840                   | 70367892,70371612                   | 1 |
| 3455 | chr11 | + | 70418496,70423579                   | 70418707,70423685                   | 1 |
| 3456 | chr11 | - | 70432254,70431656                   | 70432397,70431812                   | 3 |
| 3460 | chr11 | + | 70463176,70464265                   | 70463836,70464346                   | 1 |
| 3463 | chr11 | - | 70478284,70477821                   | 70478369,70477978                   | 3 |
| 3464 | chr11 | - | 70496780,70497391                   | 70497278,70497527                   | 5 |
|      | chr11 | - | 70497606,70484509                   | 70497674,70484581                   | 1 |
|      | chr11 | - | 70501387,70493028                   | 70501436,70493155                   | 1 |
| 3470 | chr11 | + | 70718106,70748628                   | 70718285,70748684                   | 2 |
|      | chr11 | + | 70721887,70747906                   | 70722019,70748096                   | 1 |
| 3471 | chr11 | - | 70756572,70757983,70757380          | 70756824,70758082,70757499          | 1 |
|      | chr11 | - | 70757983,70757380,70758174,70757983 | 70758082,70757499,70758240,70758064 | 5 |
|      | chr11 | - | 70763066,70758704                   | 70763738,70758863                   | 1 |
| 3473 | chr11 | - | 70793511,70791929                   | 70793605,70792052                   | 1 |
| 3484 | chr11 | - | 71949155,71880607                   | 71949391,71880780                   | 1 |
| 3493 | chr11 | - | 72175294,72159087,72158221          | 72175382,72159284,72158473          | 1 |
| 349  | chr1  | - | 63199348,63193863                   | 63199478,63193998                   | 3 |
| 3502 | chr11 | + | 72664060,72736611                   | 72664273,72736683                   | 1 |
| 352  | chr1  | + | 63337220,63321669                   | 63337356,63321752                   | 1 |
| 3556 | chr11 | + | 74587023,74597559,74605704          | 74587151,74597759,74605820          | 1 |
|      | chr11 | + | 74601056,74630371                   | 74601197,74630545                   | 1 |
| 3577 | chr11 | + | 75307315,75322022                   | 75307522,75322162                   | 2 |
|      | chr11 | + | 75307315,75322268                   | 75307522,75322471                   | 7 |
|      | chr11 | + | 75307639,75322636                   | 75307803,75322949                   | 4 |
|      | chr11 | + | 75314819,75317979                   | 75314966,75318093                   | 1 |
| 3581 | chr11 | + | 75405690,75438966                   | 75405721,75439032                   | 2 |
|      | chr11 | + | 75425721,75439618                   | 75425805,75442280                   | 1 |
| 3585 | chr11 | + | 75565382,75572793                   | 75565582,75572930                   | 1 |
|      | chr11 | + | 75565382,75578121                   | 75565582,75579340                   | 1 |
| 3590 | chr11 | - | 75861941,75859727                   | 75862079,75860084                   | 1 |
|      | chr11 | - | 75935019,75859727                   | 75935098,75860084                   | 1 |
|      | chr11 | - | 75935019,75915488                   | 75935098,75915590                   | 1 |
| 3598 | chr11 | + | 76220691,76224628,76220691          | 76220944,76224701,76220944          | 1 |
|      | chr11 | + | 76220691,76224628,76227547          | 76220944,76224701,76227994          | 4 |
| 3599 | chr11 | - | 76265354,76230235                   | 76265486,76232695                   | 1 |
| 35   | chr1  | + | 11788561,11962126,11965003          | 11788647,11962183,11965982          | 2 |
|      | chr1  | + | 11819895,11941043                   | 11819972,11941137                   | 1 |
| 3605 | chr11 | + | 76763461,76779316                   | 76763571,76779472                   | 2 |
| 3612 | chr11 | - | 77285950,77283988                   | 77286379,77285880                   | 1 |
| 3619 | chr11 | + | 77590766,77629357                   | 77591816,77629393                   | 1 |
|      | chr11 | + | 77643121,77660793                   | 77643365,77660940                   | 1 |
|      | chr11 | + | 77660793,77662871,77660392          | 77660940,77662988,77660497          | 1 |
| 3625 | chr11 | + | 77862979,77869258                   | 77863061,77869382                   | 1 |
| 3627 | chr11 | - | 77891318,77886877                   | 77891396,77887676                   | 1 |
| 3633 | chr11 | + | 78002335,78004709                   | 78002892,78004791                   | 1 |
| 3635 | chr11 | - | 78026170,78025298                   | 78026409,78025423                   | 1 |
| 3637 | chr11 | + | 78079852,78088289                   | 78079976,78088389                   | 1 |
|      | chr11 | + | 78088289,78100797                   | 78088389,78100884                   | 1 |
|      | chr11 | + | 78100797,78102787                   | 78100884,78102922                   | 1 |

|      |       |   |                                     |                                     |   |
|------|-------|---|-------------------------------------|-------------------------------------|---|
| 363  | chr1  | + | 64737786,64768200                   | 64737974,64768363                   | 1 |
| 3641 | chr11 | + | 78128206,78134544                   | 78128300,78134625                   | 1 |
|      | chr11 | + | 78128462,78129010                   | 78128610,78129144                   | 1 |
| 3642 | chr11 | + | 78138105,78138550                   | 78138317,78138711                   | 1 |
| 3643 | chr11 | + | 78148928,78154726                   | 78149136,78154937                   | 1 |
| 3644 | chr11 | + | 78161298,78162032                   | 78161401,78162658                   | 1 |
|      | chr11 | + | 78162032,78160719,78161588          | 78162658,78160833,78161761          | 9 |
| 3648 | chr11 | + | 78284196,78279219,78282126          | 78284353,78279507,78282210          | 3 |
| 3650 | chr11 | + | 78312787,78313202                   | 78312915,78313544                   | 1 |
| 3653 | chr11 | + | 78332454,78334653                   | 78332481,78334733                   | 1 |
| 3663 | chr11 | - | 78780945,78776896                   | 78780996,78777043                   | 1 |
| 3666 | chr11 | + | 79281615,79378919,79379421,79382151 | 79281656,79379053,79379522,79382294 | 1 |
|      | chr11 | + | 79282218,79362175                   | 79282377,79362290                   | 1 |
| 3676 | chr11 | + | 79826865,79838411                   | 79827097,79838503                   | 1 |
| 3683 | chr11 | + | 80061939,80064544                   | 80062040,80064628                   | 1 |
| 3684 | chr11 | + | 80136860,80114577,80136860          | 80137085,80114773,80137085          | 1 |
| 3705 | chr11 | + | 82608005,82608866                   | 82608085,82609288                   | 3 |
| 3709 | chr11 | - | 82721054,82715210                   | 82721272,82715370                   | 1 |
| 3710 | chr11 | + | 82726705,82751237                   | 82726881,82751355                   | 1 |
| 3724 | chr11 | + | 83138012,83203204                   | 83138258,83203289                   | 1 |
| 373  | chr1  | - | 65212680,65205201                   | 65212858,65206129                   | 1 |
| 3741 | chr11 | + | 83572805,83585746                   | 83572920,83587794                   | 1 |
| 3743 | chr11 | + | 83770967,83775251                   | 83771039,83775692                   | 1 |
| 3744 | chr11 | + | 83836762,83852712                   | 83836926,83852823                   | 1 |
| 3747 | chr11 | + | 84027659,84036643                   | 84027792,84036753                   | 1 |
|      | chr11 | + | 84039635,84185002                   | 84039734,84185099                   | 1 |
| 3749 | chr11 | - | 84284589,84259128                   | 84284788,84259209                   | 1 |
| 3756 | chr11 | - | 84667555,84647836                   | 84667669,84648085                   | 1 |
|      | chr11 | - | 84684139,84651342                   | 84684240,84651490                   | 2 |
| 3766 | chr11 | + | 85271369,85394543                   | 85271446,85394740                   | 1 |
|      | chr11 | + | 85372572,85635523                   | 85372673,85635614                   | 1 |
|      | chr11 | + | 85394543,85615286                   | 85394740,85615454                   | 1 |
|      | chr11 | + | 85627501,85397398                   | 85627567,85397496                   | 2 |
| 3780 | chr11 | - | 86479278,86474624                   | 86479380,86474735                   | 1 |
| 3783 | chr11 | - | 86617758,86582350                   | 86617904,86583763                   | 2 |
| 3794 | chr11 | + | 87365032,87368985,87362933          | 87365142,87369325,87363026          | 4 |
| 3795 | chr11 | + | 87392411,87403817                   | 87392530,87404041                   | 1 |
| 379  | chr1  | + | 66719230,66700957,66718159          | 66719356,66701176,66718283          | 1 |
| 3803 | chr11 | + | 87590548,87594803                   | 87590737,87594836                   | 1 |
|      | chr11 | + | 87594991,87595446                   | 87595095,87595551                   | 1 |
| 3815 | chr11 | + | 87996740,88003556                   | 87996933,88003627                   | 1 |
| 3819 | chr11 | + | 88581067,88589472                   | 88583914,88589886                   | 1 |
|      | chr11 | + | 88588854,88581067                   | 88588954,88583914                   | 1 |
| 3820 | chr11 | - | 88700938,88695975                   | 88701065,88696043                   | 1 |
| 382  | chr1  | - | 66888195,66883535                   | 66888309,66883622                   | 2 |
| 3842 | chr11 | + | 93439979,93458426                   | 93440075,93458581                   | 1 |
| 3843 | chr11 | + | 93728258,93727659                   | 93729768,93727834                   | 1 |
| 384  | chr1  | - | 67053441,67050912                   | 67053624,67050985                   | 2 |
|      | chr1  | - | 67056484,67053441                   | 67056620,67053624                   | 1 |
|      | chr1  | - | 67067431,67051363                   | 67067639,67051540                   | 1 |
|      | chr1  | - | 67080697,67047090                   | 67080815,67050131                   | 1 |
|      | chr1  | - | 67080697,67067431,67067431,67055801 | 67080815,67067639,67067639,67055948 | 3 |
| 3850 | chr11 | - | 94154398,94152452                   | 94154592,94154346                   | 1 |
|      | chr11 | - | 94157233,94152453                   | 94157394,94152892                   | 1 |
|      | chr11 | - | 94170938,94159072                   | 94171005,94159234                   | 1 |
| 3868 | chr11 | + | 94802693,94805668                   | 94802747,94805722                   | 2 |
|      | chr11 | + | 94806065,94812414                   | 94806119,94812657                   | 1 |
| 3871 | chr11 | + | 94862532,94863392                   | 94862668,94863446                   | 1 |
| 3881 | chr11 | + | 95249083,95251591                   | 95249241,95251698                   | 1 |
| 3896 | chr11 | + | 95896632,95907593                   | 95896683,95907668                   | 3 |
|      | chr11 | + | 95902938,95908508                   | 95903043,95908719                   | 2 |
| 3898 | chr11 | - | 95935275,95930167                   | 95935353,95934532                   | 1 |
| 3916 | chr11 | + | 96664041,96667929                   | 96665283,96668078                   | 1 |
|      | chr11 | + | 96667929,96664041                   | 96668078,96665283                   | 2 |
| 392  | chr1  | + | 70775272,70928640                   | 70778776,70931971                   | 1 |
| 3935 | chr11 | - | 97079104,97067170                   | 97079161,97068582                   | 1 |



|      |       |   |                                         |                                         |   |
|------|-------|---|-----------------------------------------|-----------------------------------------|---|
|      | chr11 | - | 97097378,97091143                       | 97097483,97091207                       | 1 |
|      | chr11 | - | 97102242,97084264                       | 97102357,97084484                       | 2 |
| 3936 | chr11 | + | 97182756,97185164,97188095              | 97182874,97185263,97188245              | 1 |
| 3941 | chr11 | - | 97412990,97395065                       | 97413292,97395158                       | 1 |
|      | chr11 | - | 97412990,97403847,97412990              | 97413292,97403871,97413292              | 9 |
| 3952 | chr11 | - | 97643316,97642647,97639578,97638857     | 97643571,97642776,97639692,97639478     | 1 |
| 3962 | chr11 | - | 98014974,98013468                       | 98019783,98014439                       | 2 |
| 3966 | chr11 | + | 98211882,98212579                       | 98211943,98212655                       | 1 |
|      | chr11 | + | 98212579,98218346                       | 98212655,98219109                       | 1 |
| 3967 | chr11 | + | 98238065,98239648                       | 98238164,98239744                       | 1 |
| 3980 | chr11 | + | 98543867,98554696                       | 98544251,98554811                       | 1 |
|      | chr11 | + | 98547247,98554696                       | 98547385,98554811                       | 1 |
|      | chr11 | + | 98551776,98555118                       | 98551967,98555222                       | 1 |
|      | chr11 | + | 98554696,98551776                       | 98554811,98553831                       | 2 |
|      | chr11 | + | 98554696,98556676                       | 98554811,98556727                       | 2 |
|      | chr11 | + | 98555118,98556676                       | 98555222,98556727                       | 1 |
| 3982 | chr11 | - | 98579810,98575346                       | 98579884,98575433                       | 1 |
| 3983 | chr11 | + | 98614603,98625591                       | 98614952,98626425                       | 4 |
|      | chr11 | + | 98625591,98629470                       | 98626425,98630320                       | 1 |
| 3985 | chr11 | + | 98656829,98664095                       | 98657918,98664160                       | 2 |
| 398  | chr1  | + | 71623190,71625125                       | 71623373,71625978                       | 1 |
| 3993 | chr11 | - | 98885359,98857163                       | 98885503,98857287                       | 1 |
| 3997 | chr11 | - | 99089588,99081968,99091715              | 99089632,99082049,99092331              | 1 |
| 4050 | chr11 | - | 100067284,100066261,100065946           | 100067344,100066418,100066108           | 1 |
| 4058 | chr11 | - | 100275240,100272427                     | 100275393,100272511                     | 1 |
| 4060 | chr11 | - | 100292390,100290665,100296008,100292390 | 100292591,100291263,100296098,100292591 | 1 |
|      | chr11 | - | 100296008,100302357,100301498           | 100296098,100302496,100301568           | 1 |
| 4063 | chr11 | - | 100366168,100340497                     | 100366323,100340611                     | 1 |
| 4066 | chr11 | - | 100444149,100459928,100444149           | 100444450,100460042,100444450           | 3 |
|      | chr11 | - | 100480841,100445865                     | 100481482,100446012                     | 5 |
|      | chr11 | - | 100480841,100457479                     | 100481482,100457554                     | 1 |
| 4071 | chr11 | - | 100569522,100566889                     | 100569649,100566974                     | 1 |
|      | chr11 | - | 100570696,100570159,100571758,100570696 | 100570803,100570296,100571950,100570803 | 2 |
| 4073 | chr11 | - | 100608058,100605437                     | 100608303,100605514                     | 1 |
| 407  | chr1  | + | 72642361,72673036                       | 72642548,72673490                       | 1 |
|      | chr1  | + | 72673036,72679394                       | 72673490,72679706                       | 2 |
| 4080 | chr11 | + | 100890489,100895214                     | 100890572,100895427                     | 1 |
|      | chr11 | + | 100899472,100909731                     | 100899612,100909839                     | 1 |
| 4084 | chr11 | + | 100949549,100952422                     | 100949639,100953521                     | 1 |
| 4087 | chr11 | + | 100983986,101019096                     | 100984055,101019176                     | 1 |
|      | chr11 | + | 100985226,101021370                     | 100985353,101021457                     | 2 |
|      | chr11 | + | 100985736,101022107                     | 100985886,101022260                     | 2 |
|      | chr11 | + | 100986516,101022718                     | 100986678,101023101                     | 3 |
|      | chr11 | + | 100987345,100987345,101017233           | 100987733,100987733,101018234           | 1 |
| 408  | chr1  | - | 72726082,72704984                       | 72726121,72705146                       | 1 |
| 4092 | chr11 | + | 101114917,101116256,101118191           | 101115121,101116310,101118267           | 1 |
| 4097 | chr11 | - | 101163041,101151096                     | 101163170,101151239                     | 1 |
| 4102 | chr11 | - | 101272074,101270966                     | 101272205,101271021                     | 1 |
|      | chr11 | - | 101272607,101271427                     | 101272764,101271519                     | 1 |
|      | chr11 | - | 101275250,101272074                     | 101275410,101272205                     | 1 |
|      | chr11 | - | 101278663,101269444                     | 101278747,101269539                     | 2 |
| 4107 | chr11 | - | 101327021,101323511                     | 101327513,101323601                     | 2 |
| 4131 | chr11 | - | 102058652,102057551                     | 102058750,102057636                     | 2 |
|      | chr11 | - | 102068220,102060318                     | 102068480,102060374                     | 1 |
|      | chr11 | - | 102068220,102060949                     | 102068480,102060999                     | 1 |
| 4134 | chr11 | + | 102146977,102149389                     | 102147032,102150738                     | 1 |
| 4135 | chr11 | - | 102155823,102150613                     | 102155956,102153117                     | 1 |
| 4136 | chr11 | - | 102171504,102170710                     | 102171646,102170866                     | 1 |
| 4138 | chr11 | + | 102254989,102260696                     | 102255096,102260777                     | 1 |
|      | chr11 | + | 102259690,102258884,102259690           | 102259776,102259000,102259776           | 2 |
| 4139 | chr11 | - | 102265765,102264460                     | 102265939,102264849                     | 1 |
| 4140 | chr11 | + | 102295249,102296016                     | 102295359,102296140                     | 1 |
|      | chr11 | + | 102295249,102297022                     | 102295359,102297256                     | 1 |
|      | chr11 | + | 102297022,102297648                     | 102297256,102298119                     | 2 |
| 4142 | chr11 | - | 102314610,102314959                     | 102314831,102317314                     | 1 |
| 4148 | chr11 | - | 102549632,102551514                     | 102550173,102551650                     | 4 |

|      |       |   |                                         |                                         |    |
|------|-------|---|-----------------------------------------|-----------------------------------------|----|
| 4149 | chr11 | + | 102633228,102634890                     | 102633295,102634981                     | 1  |
|      | chr11 | + | 102637379,102638102                     | 102637479,102638217                     | 1  |
| 4160 | chr11 | - | 102878363,102860957                     | 102878461,102861161                     | 1  |
| 4162 | chr11 | - | 102935872,102936170                     | 102936023,102938180                     | 4  |
| 4166 | chr11 | + | 103043022,103043955                     | 103043096,103044081                     | 1  |
|      | chr11 | + | 103046934,103058628                     | 103047043,103058709                     | 1  |
|      | chr11 | + | 103054263,103059448                     | 103054516,103059547                     | 2  |
|      | chr11 | + | 103054761,103057998                     | 103055049,103058162                     | 1  |
|      | chr11 | + | 103054761,103059448                     | 103055049,103059547                     | 1  |
| 41   | chr1  | - | 13568180,13561883                       | 13568239,13561988                       | 1  |
| 4212 | chr11 | - | 103775114,103709307                     | 103775222,103709374                     | 1  |
| 4216 | chr11 | + | 104092749,104156172                     | 104092921,104156631                     | 3  |
|      | chr11 | + | 104143681,104189285                     | 104143794,104189493                     | 4  |
|      | chr11 | + | 104148436,104163674                     | 104148523,104163724                     | 4  |
|      | chr11 | + | 104156172,104167939                     | 104156238,104168072                     | 1  |
|      | chr11 | + | 104163674,104182664                     | 104163724,104182746                     | 3  |
|      | chr11 | + | 104167939,104179470                     | 104168072,104179563                     | 1  |
|      | chr11 | + | 104171582,104189285,104171582           | 104171848,104189493,104171848           | 1  |
| 4230 | chr11 | + | 105451299,105747671                     | 105451563,105747780                     | 1  |
|      | chr11 | + | 105574695,105638119                     | 105576867,105638268                     | 1  |
| 4243 | chr11 | - | 106114213,106111661                     | 106114314,106111747                     | 1  |
|      | chr11 | - | 106114213,106113741                     | 106114314,106113891                     | 1  |
| 4244 | chr11 | + | 106122498,106123431                     | 106122596,106123622                     | 1  |
| 4245 | chr11 | - | 106125985,106125508                     | 106126121,106125610                     | 1  |
| 424  | chr1  | + | 74292653,74309032                       | 74292688,74309159                       | 1  |
|      | chr1  | + | 74297827,74314344                       | 74297873,74314787                       | 1  |
| 4258 | chr11 | + | 106662776,106679147                     | 106662892,106679294                     | 1  |
|      | chr11 | + | 106679147,106679847                     | 106679294,106680143                     | 1  |
| 4263 | chr11 | - | 106905805,106896710,106908313           | 106905979,106897904,106908657           | 1  |
|      | chr11 | - | 106905805,106904946,106916168,106905805 | 106905979,106905139,106916632,106905979 | 1  |
|      | chr11 | - | 106914102,106917185,106914536           | 106914328,106917420,106914619           | 1  |
|      | chr11 | - | 106928440,106901539                     | 106928569,106901726                     | 1  |
|      | chr11 | - | 106948025,106942529                     | 106948211,106942885                     | 1  |
|      | chr11 | - | 106956315,106938973                     | 106956504,106939112                     | 2  |
|      | chr11 | - | 106956315,106939833                     | 106956504,106939963                     | 1  |
|      | chr11 | - | 106956315,106948025                     | 106956504,106948211                     | 3  |
| 4270 | chr11 | + | 107409273,107527312                     | 107409295,107527392                     | 1  |
| 4272 | chr11 | - | 107655558,107596093                     | 107655778,107596632                     | 1  |
| 4295 | chr11 | + | 109287259,109287539                     | 109287344,109287889                     | 1  |
|      | chr11 | + | 109297876,109297876,109313075           | 109299462,109299462,109314127           | 29 |
|      | chr11 | + | 109297876,109313075,109297876           | 109299462,109314127,109299462           | 12 |
| 4298 | chr11 | - | 109464986,109446408                     | 109465156,109446506                     | 1  |
| 4304 | chr11 | - | 109836303,109808378                     | 109836445,109808498                     | 1  |
| 4309 | chr11 | + | 110260435,110354209                     | 110260739,110354326                     | 1  |
| 4313 | chr11 | - | 112552605,112533397                     | 112553028,112533718                     | 1  |
| 4359 | chr11 | + | 115267864,115271545                     | 115267901,115271715                     | 1  |
| 4361 | chr11 | + | 115281463,115285797                     | 115281820,115285889                     | 1  |
| 4368 | chr11 | + | 115440103,115445034                     | 115440210,115445226                     | 1  |
| 4370 | chr11 | + | 115465464,115466336,115467283,115468131 | 115465557,115466400,115467451,115468938 | 1  |
| 4374 | chr11 | + | 115650258,115652280                     | 115650345,115652490                     | 1  |
|      | chr11 | + | 115650557,115658876                     | 115650674,115658970                     | 1  |
| 4376 | chr11 | + | 115681692,115682969,115683896           | 115682321,115683030,115684416           | 4  |
| 4383 | chr11 | + | 115796679,115823807                     | 115796789,115823866                     | 1  |
| 4385 | chr11 | + | 115853199,115854216                     | 115853223,115854517                     | 1  |
| 438  | chr1  | + | 74637533,74638395                       | 74637703,74639017                       | 1  |
| 4394 | chr11 | - | 116000024,115995569                     | 116000182,115995615                     | 1  |
| 4396 | chr11 | - | 116025976,116015266                     | 116026004,116015366                     | 1  |
|      | chr11 | - | 116028865,116016697                     | 116029492,116016814                     | 1  |
| 4398 | chr11 | + | 116060202,116076152                     | 116060297,116076632                     | 1  |
|      | chr11 | + | 116060202,116076152,116076152           | 116060297,116076632,116076632           | 1  |
| 4400 | chr11 | - | 116094699,116093707                     | 116094825,116093803                     | 1  |
| 4401 | chr11 | - | 116112049,116106479                     | 116112206,116107244                     | 1  |
|      | chr11 | - | 116112049,116107958                     | 116112206,116108034                     | 2  |
| 4403 | chr11 | - | 116162417,116151263                     | 116162640,116151305                     | 2  |
| 4405 | chr11 | - | 116257502,116221567                     | 116257621,116221714                     | 2  |
| 4411 | chr11 | - | 116407147,116404104                     | 116407291,116404194                     | 2  |

|      |       |   |                                         |                                         |   |
|------|-------|---|-----------------------------------------|-----------------------------------------|---|
| 4425 | chr11 | - | 116713334,116712169                     | 116713645,116712275                     | 3 |
| 4427 | chr11 | + | 116792936,116844905                     | 116793084,116844980                     | 1 |
| 4445 | chr11 | + | 117866683,117866683,117880920           | 117867205,117867205,117881046           | 2 |
| 4449 | chr11 | - | 118063686,118030329                     | 118063784,118030484                     | 5 |
| 4451 | chr11 | - | 118181422,118162374                     | 118181523,118165210                     | 1 |
| 4457 | chr11 | - | 118471472,118362882                     | 118471512,118362943                     | 1 |
|      | chr11 | - | 118772749,118357664,118356531,118355463 | 118772911,118357845,118356596,118355542 | 1 |
| 4467 | chr11 | + | 119139578,119145372                     | 119139696,119145537                     | 1 |
|      | chr11 | + | 119139578,119145760                     | 119139696,119145913                     | 3 |
| 4482 | chr11 | + | 119804405,119857836                     | 119804562,119858061                     | 1 |
| 4502 | chr11 | + | 120329004,120344057                     | 120329077,120344177                     | 1 |
|      | chr11 | + | 120341337,120344702                     | 120341512,120345291                     | 1 |
| 4508 | chr11 | - | 120423677,120421617                     | 120423859,120422574                     | 1 |
|      | chr11 | - | 120432834,120424916                     | 120433041,120425042                     | 1 |
| 4513 | chr11 | - | 120474692,120472941                     | 120474737,120473019                     | 1 |
|      | chr11 | - | 120475644,120471400                     | 120475711,120472085                     | 3 |
| 4521 | chr11 | + | 120539733,120562457                     | 120539834,120562597                     | 1 |
|      | chr11 | + | 120539733,120562794                     | 120539834,120562876                     | 1 |
|      | chr11 | + | 120564916,120565385,120570243           | 120564979,120565438,120570313           | 1 |
| 4522 | chr11 | - | 120572254,120575006,120573016           | 120572620,120575081,120573070           | 5 |
|      | chr11 | - | 120573753,120572254                     | 120574026,120572620                     | 1 |
|      | chr11 | - | 120575006,120573016,120572703,120572254 | 120575081,120573070,120572792,120572620 | 3 |
| 4523 | chr11 | + | 120579350,120581499                     | 120579486,120581647                     | 1 |
|      | chr11 | + | 120579557,120580353                     | 120579635,120580446                     | 1 |
|      | chr11 | + | 120579557,120581499                     | 120579635,120581647                     | 2 |
|      | chr11 | + | 120580353,120581499                     | 120580446,120581647                     | 1 |
| 4524 | chr11 | + | 120582781,120584792                     | 120582955,120585283                     | 5 |
| 4532 | chr11 | - | 120671443,120667271                     | 120671595,120669305                     | 1 |
|      | chr11 | - | 120671954,120667271                     | 120672106,120669305                     | 1 |
|      | chr11 | - | 120676604,120670032                     | 120676784,120670253                     | 1 |
| 4533 | chr11 | - | 120782833,120721714                     | 120783248,120721940                     | 1 |
| 4535 | chr11 | - | 120852248,120832880                     | 120852647,120833029                     | 1 |
| 4543 | chr11 | + | 121079856,121082396,121082549           | 121080052,121082475,121082651           | 3 |
|      | chr11 | + | 121082396,121082814                     | 121082475,121082904                     | 1 |
| 4545 | chr11 | + | 121106651,121110442                     | 121106770,121110506                     | 2 |
| 454  | chr1  | + | 75139359,75142253                       | 75139702,75142389                       | 2 |
| 4551 | chr11 | + | 121358308,121466576                     | 121358451,121466654                     | 2 |
|      | chr11 | + | 121464301,121478241                     | 121464460,121478482                     | 1 |
| 4560 | chr12 | + | 3365131,3388134                         | 3367531,3388257                         | 1 |
| 4562 | chr12 | + | 3489636,3457061,3484444                 | 3489733,3457209,3484608                 | 1 |
| 4563 | chr12 | + | 3632809,3686737                         | 3632964,3686862                         | 1 |
|      | chr12 | + | 3648222,3686737,3718411,3734938         | 3648389,3686862,3718489,3735026         | 1 |
|      | chr12 | + | 3734938,3718411,3734938                 | 3735026,3718489,3735026                 | 1 |
|      | chr12 | + | 3749469,3718411,3734938                 | 3749583,3718489,3735026                 | 1 |
|      | chr12 | + | 3772586,3779618,3751810                 | 3772746,3779654,3751907                 | 3 |
|      | chr12 | + | 3772586,3779618,3781105                 | 3772746,3779654,3781505                 | 1 |
|      | chr12 | + | 3781105,3772586,3774569                 | 3781505,3772746,3774610                 | 4 |
| 4565 | chr12 | + | 3807159,3891743                         | 3807254,3891860                         | 1 |
| 4569 | chr12 | + | 4200901,4203513                         | 4201044,4203601                         | 1 |
| 4572 | chr12 | - | 4290813,4275172                         | 4290994,4275341                         | 2 |
|      | chr12 | - | 4313025,4259211                         | 4313121,4259395                         | 1 |
| 4573 | chr12 | + | 4631696,4639179                         | 4631789,4639243                         | 1 |
|      | chr12 | + | 4640282,4659156                         | 4640368,4659293                         | 1 |
|      | chr12 | + | 4659156,4713770                         | 4659293,4713938                         | 1 |
| 4579 | chr12 | - | 4844974,4839979                         | 4845022,4840601                         | 1 |
| 458  | chr1  | + | 75189164,75191415,75191637              | 75189252,75191518,75191831              | 2 |
| 4607 | chr12 | + | 8981739,9014807                         | 8981857,9014917                         | 1 |
|      | chr12 | + | 9002874,9031691                         | 9002935,9031848                         | 1 |
| 4622 | chr12 | - | 13237097,13234110                       | 13237187,13234257                       | 1 |
|      | chr12 | - | 13246296,13232204                       | 13246373,13232296                       | 1 |
|      | chr12 | - | 13247364,13232204                       | 13247448,13232296                       | 1 |
|      | chr12 | - | 13247656,13230481                       | 13247740,13230524                       | 1 |
|      | chr12 | - | 13250665,13230598                       | 13250762,13230671                       | 1 |
| 4638 | chr12 | + | 17287372,17290743                       | 17287445,17291576                       | 1 |
| 464  | chr1  | - | 75243615,75249834,75244411              | 75244195,75250035,75244485              | 1 |
|      | chr1  | - | 75249586,75248325                       | 75249734,75248492                       | 1 |

|      |       |   |                                     |                                     |   |
|------|-------|---|-------------------------------------|-------------------------------------|---|
|      | chr1  | - | 75257145,75251159                   | 75257242,75251224                   | 1 |
|      | chr1  | - | 75258601,75243615                   | 75258715,75244195                   | 1 |
|      | chr1  | - | 75258601,75244411                   | 75258715,75244485                   | 3 |
| 4651 | chr12 | + | 21174064,21205404                   | 21174137,21205479                   | 1 |
| 4653 | chr12 | + | 21308219,21312156                   | 21308366,21312742                   | 5 |
| 4654 | chr12 | + | 21325630,21329149                   | 21325792,21329468                   | 1 |
|      | chr12 | + | 21325630,21329149,21329149          | 21325792,21329468,21329468          | 2 |
| 465  | chr1  | - | 75272187,75270742,75268776          | 75272292,75270785,75268936          | 7 |
| 4660 | chr12 | + | 22885355,22888142                   | 22885696,22888976                   | 1 |
| 466  | chr1  | - | 75312519,75304470                   | 75312645,75305284                   | 1 |
|      | chr1  | - | 75313465,75308979                   | 75313568,75309140                   | 2 |
| 4672 | chr12 | + | 25659796,25674602                   | 25659927,25674701                   | 1 |
|      | chr12 | + | 25682096,25746082                   | 25682195,25746143                   | 1 |
|      | chr12 | + | 25741446,25747567                   | 25744562,25748010                   | 4 |
|      | chr12 | + | 25747567,25741446                   | 25748010,25744562                   | 2 |
| 4689 | chr12 | + | 30570987,30599098                   | 30571050,30599202                   | 2 |
| 4690 | chr12 | + | 30660355,30667562                   | 30660427,30667634                   | 2 |
| 4700 | chr12 | + | 32012509,32014221                   | 32012686,32014504                   | 1 |
| 4709 | chr12 | - | 32625142,32613448                   | 32625371,32613590                   | 1 |
| 471  | chr1  | + | 75432517,75432721                   | 75432586,75432887                   | 1 |
|      | chr1  | + | 75433352,75438304                   | 75433413,75438402                   | 1 |
|      | chr1  | + | 75438049,75438759                   | 75438184,75438852                   | 1 |
|      | chr1  | + | 75438049,75439475                   | 75438184,75439751                   | 1 |
| 4734 | chr12 | - | 36845573,36818425                   | 36845709,36818896                   | 1 |
|      | chr12 | - | 36847305,36819553                   | 36847371,36819676                   | 2 |
| 4748 | chr12 | - | 40940564,40933575                   | 40940722,40933710                   | 1 |
| 4751 | chr12 | + | 41506232,41521354                   | 41506291,41521450                   | 1 |
| 4755 | chr12 | + | 45384297,45396884                   | 45384691,45397056                   | 1 |
| 4756 | chr12 | + | 45671235,45691967                   | 45671394,45692046                   | 1 |
|      | chr12 | + | 45677590,45679131,45676862          | 45677776,45679167,45676985          | 1 |
|      | chr12 | + | 45677590,45679131,45691094,45691967 | 45677776,45679167,45691226,45692046 | 1 |
|      | chr12 | + | 45677590,45691094,45676862,45677590 | 45677767,45691226,45676985,45678386 | 1 |
|      | chr12 | + | 45677590,45691967                   | 45678386,45692046                   | 1 |
|      | chr12 | + | 45691967,45699336,45677590,45691094 | 45692046,45699828,45677767,45691226 | 2 |
|      | chr12 | + | 45695126,45699336                   | 45695188,45699828                   | 1 |
| 475  | chr1  | - | 75496476,75490359                   | 75496749,75490632                   | 2 |
| 4764 | chr12 | + | 52478566,52546657                   | 52478623,52546723                   | 2 |
|      | chr12 | + | 52516501,52548558                   | 52516583,52548627                   | 3 |
| 4766 | chr12 | - | 52792408,52710628                   | 52792874,52711259                   | 1 |
| 4767 | chr12 | + | 52821622,52831874                   | 52821709,52831886                   | 2 |
| 4769 | chr12 | - | 52928338,52904655                   | 52928500,52904883                   | 2 |
| 4774 | chr12 | + | 53604958,53645182                   | 53605035,53646626                   | 1 |
| 4783 | chr12 | - | 55866570,55852927                   | 55866666,55853087                   | 1 |
|      | chr12 | - | 55866570,55855276                   | 55866666,55855363                   | 1 |
|      | chr12 | - | 55885001,55852768                   | 55885106,55852854                   | 1 |
| 4788 | chr12 | - | 56086652,56047788                   | 56086794,56047890                   | 1 |
| 478  | chr1  | + | 75549830,75554201                   | 75550056,75554375                   | 2 |
| 4792 | chr12 | + | 56265216,56341246                   | 56265326,56341338                   | 1 |
|      | chr12 | + | 56267295,56346925                   | 56267380,56347030                   | 1 |
|      | chr12 | + | 56277386,56353113                   | 56277535,56353214                   | 1 |
|      | chr12 | + | 56277869,56353758                   | 56277970,56353845                   | 3 |
|      | chr12 | + | 56278514,56356525                   | 56278601,56356599                   | 1 |
|      | chr12 | + | 56281237,56356954                   | 56281311,56357063                   | 2 |
|      | chr12 | + | 56281663,56358411                   | 56281772,56358582                   | 3 |
|      | chr12 | + | 56287132,56363113                   | 56287228,56365681                   | 3 |
| 4822 | chr12 | + | 62770466,62944298                   | 62770641,62946245                   | 1 |
| 4827 | chr12 | - | 66167628,66164664                   | 66167764,66164762                   | 1 |
| 4828 | chr12 | + | 66193342,66217319                   | 66193475,66217451                   | 1 |
| 4832 | chr12 | - | 67607092,67585591                   | 67607251,67587828                   | 2 |
|      | chr12 | - | 67817589,67607092                   | 67817722,67607251                   | 1 |
| 483  | chr1  | - | 78459846,78458880                   | 78459908,78458961                   | 1 |
|      | chr1  | - | 78465826,78463541                   | 78465897,78463593                   | 1 |
|      | chr1  | - | 78472764,78451328                   | 78472880,78451446                   | 2 |
| 4840 | chr12 | + | 70401202,70408176                   | 70402104,70409653                   | 1 |
| 4841 | chr12 | - | 70417393,70413411                   | 70417807,70413455                   | 1 |
|      | chr12 | - | 70445895,70432858                   | 70445966,70432962                   | 1 |

|      |       |   |                                     |                                     |    |
|------|-------|---|-------------------------------------|-------------------------------------|----|
|      | chr12 | - | 70454780,70445895                   | 70454929,70445966                   | 2  |
| 4845 | chr12 | - | 70683517,70682104,70680892          | 70683617,70682224,70680997          | 11 |
| 4852 | chr12 | + | 70994255,71035856                   | 70994331,71035907                   | 1  |
| 4859 | chr12 | - | 71447333,71382819                   | 71448314,71382930                   | 1  |
| 4862 | chr12 | + | 72038893,72053936                   | 72039018,72054016                   | 1  |
|      | chr12 | + | 72044395,72057586                   | 72044504,72057660                   | 1  |
|      | chr12 | + | 72050690,72055605,72059018          | 72050758,72055641,72059100          | 1  |
|      | chr12 | + | 72055605,72060827                   | 72055641,72061029                   | 2  |
|      | chr12 | + | 72057259,72059018                   | 72057339,72059100                   | 1  |
| 4879 | chr12 | + | 73190942,73201596                   | 73191097,73201829                   | 2  |
| 4881 | chr12 | - | 73312738,73337515,73317901          | 73313564,73337711,73317948          | 1  |
|      | chr12 | - | 73317901,73312738                   | 73317948,73313564                   | 1  |
|      | chr12 | - | 73320243,73312738                   | 73320382,73313564                   | 1  |
|      | chr12 | - | 73320243,73317901                   | 73320382,73317948                   | 3  |
|      | chr12 | - | 73324318,73318405                   | 73324526,73318475                   | 21 |
|      | chr12 | - | 73337515,73336647,73324318,73320243 | 73337711,73336726,73324526,73320382 | 2  |
|      | chr12 | - | 73409142,73317757                   | 73409916,73317816                   | 6  |
|      | chr12 | - | 73409142,73324318                   | 73409916,73324526                   | 1  |
|      | chr12 | - | 73509297,73317757                   | 73509926,73317816                   | 1  |
| 4898 | chr12 | + | 75029200,75045897                   | 75029285,75046024                   | 1  |
| 4911 | chr12 | + | 76991212,77205951                   | 76992036,77206152                   | 1  |
|      | chr12 | + | 77023911,77044839                   | 77024070,77045042                   | 1  |
|      | chr12 | + | 77034824,77043175                   | 77035004,77043347                   | 1  |
| 4914 | chr12 | + | 77384918,77398468                   | 77385030,77398571                   | 1  |
| 4930 | chr12 | + | 79513327,79582285,79605603          | 79513420,79582352,79605738          | 3  |
| 4933 | chr12 | - | 79953251,79948753                   | 79953331,79948820                   | 2  |
| 4940 | chr12 | - | 80267337,80257008                   | 80267396,80257556                   | 1  |
| 4948 | chr12 | - | 81271672,81271169                   | 81271753,81271235                   | 1  |
| 495  | chr1  | - | 80272988,80263392                   | 80273123,80263862                   | 2  |
| 4973 | chr12 | + | 83412335,83534675                   | 83412396,83534841                   | 1  |
|      | chr12 | + | 83525999,83550296                   | 83526442,83550378                   | 2  |
|      | chr12 | + | 83550887,83547803                   | 83551258,83548113                   | 1  |
| 4976 | chr12 | + | 84870117,84882314                   | 84870218,84882867                   | 1  |
| 4978 | chr12 | + | 84972185,84987086                   | 84972306,84987254                   | 1  |
|      | chr12 | + | 84989147,85001544                   | 84989205,85001628                   | 3  |
|      | chr12 | + | 84989147,85009041                   | 84989205,85009258                   | 1  |
| 5011 | chr12 | + | 86382772,86385319                   | 86382865,86385474                   | 1  |
|      | chr12 | + | 86383891,86390082                   | 86384010,86390202                   | 1  |
|      | chr12 | + | 86390082,86410568                   | 86390202,86410749                   | 1  |
| 5014 | chr12 | + | 86451845,86460182                   | 86451909,86460294                   | 1  |
|      | chr12 | + | 86451845,86471409                   | 86451909,86471493                   | 1  |
|      | chr12 | + | 86456222,86464723                   | 86456271,86464821                   | 1  |
|      | chr12 | + | 86475039,86473568                   | 86475795,86475035                   | 3  |
| 5017 | chr12 | + | 86562426,86565504                   | 86562590,86565571                   | 1  |
|      | chr12 | + | 86563693,86565504,86566952          | 86563789,86565571,86567578          | 1  |
| 5043 | chr12 | + | 88488667,88504653                   | 88488794,88505673                   | 2  |
| 5047 | chr12 | + | 88609104,88612288                   | 88609295,88612377                   | 1  |
|      | chr12 | + | 88609104,88614396                   | 88609295,88614448                   | 1  |
| 504  | chr1  | + | 82738392,82747094                   | 82738551,82747179                   | 5  |
|      | chr1  | + | 82743657,82748159                   | 82743717,82748964                   | 4  |
|      | chr1  | + | 82748159,82725790,82743657          | 82748964,82726011,82743717          | 2  |
| 5062 | chr12 | + | 89610138,89693922                   | 89610222,89694072                   | 1  |
|      | chr12 | + | 89669464,89685084,89693922          | 89669623,89685201,89694072          | 2  |
| 5064 | chr12 | + | 90070996,91570227                   | 90071014,91571883                   | 1  |
|      | chr12 | + | 90088722,90493117                   | 90088752,90493556                   | 1  |
|      | chr12 | + | 90586689,90741461,90586689          | 90586893,90741581,90586893          | 1  |
|      | chr12 | + | 91522011,91560375,91442950          | 91522090,91561081,91443258          | 2  |
|      | chr12 | + | 91522011,91560375,91560375          | 91522090,91561081,91561081          | 1  |
|      | chr12 | + | 91522011,91570548,91442950          | 91522099,91571500,91443258          | 1  |
| 50   | chr1  | + | 15821587,15828262                   | 15821647,15828369                   | 1  |
| 5227 | chr12 | + | 99896422,99900181                   | 99896856,99900297                   | 1  |
| 5229 | chr12 | + | 99997928,100024784                  | 99998089,100025984                  | 1  |
| 5238 | chr12 | + | 101132919,101193172                 | 101132975,101193426                 | 1  |
|      | chr12 | + | 101193172,101173214,101193172       | 101193426,101173317,101193426       | 2  |
| 5245 | chr12 | - | 101733481,101625320                 | 101733650,101625404                 | 1  |
| 5249 | chr12 | - | 102149732,102154787                 | 102152001,102155080                 | 4  |

|      |       |   |                                         |                                         |    |
|------|-------|---|-----------------------------------------|-----------------------------------------|----|
| 5272 | chr12 | + | 104384511,104407776                     | 104384580,104407963                     | 2  |
| 5303 | chr12 | - | 105932687,105930336,105932687           | 105932956,105930412,105932956           | 1  |
| 5323 | chr12 | + | 107043136,107071309                     | 107043218,107071372                     | 2  |
|      | chr12 | + | 107047552,107047733,107066490           | 107047642,107047919,107066591           | 1  |
|      | chr12 | + | 107067266,107072919                     | 107067487,107073103                     | 1  |
| 5331 | chr12 | + | 109584298,109596240                     | 109584385,109596351                     | 1  |
|      | chr12 | + | 109589391,109590983                     | 109589530,109591134                     | 2  |
|      | chr12 | + | 109593633,109599405                     | 109593706,109599472                     | 1  |
| 5334 | chr12 | + | 109874458,109919700                     | 109874594,109919764                     | 1  |
|      | chr12 | + | 109891131,109924617                     | 109891309,109924675                     | 1  |
|      | chr12 | + | 109911498,109926238                     | 109911562,109926725                     | 1  |
|      | chr12 | + | 109912616,109921404                     | 109912675,109921471                     | 2  |
|      | chr12 | + | 109913606,109926238                     | 109913836,109926725                     | 1  |
| 5343 | chr12 | + | 110779213,110787688                     | 110779309,110787762                     | 1  |
|      | chr12 | + | 110781909,110784639                     | 110782015,110784752                     | 1  |
|      | chr12 | + | 110782236,110796849                     | 110783529,110799917                     | 2  |
|      | chr12 | + | 110782236,110809600                     | 110783529,110809935                     | 3  |
|      | chr12 | + | 110783827,110782236                     | 110784752,110783529                     | 4  |
|      | chr12 | + | 110783827,110784639,110787862           | 110784752,110784752,110788020           | 2  |
|      | chr12 | + | 110783827,110787366                     | 110784752,110787581                     | 6  |
|      | chr12 | + | 110784639,110787688,110787862,110809600 | 110784752,110787762,110788020,110809935 | 1  |
|      | chr12 | + | 110787862,110787862,110809600           | 110788020,110788020,110809935           | 1  |
|      | chr12 | + | 110787862,110809600,110787688           | 110788020,110809935,110787762           | 2  |
|      | chr12 | + | 110787862,110809600                     | 110788020,110809935                     | 3  |
|      | chr12 | + | 110787862,110809600,110809600           | 110788020,110809935,110809935           | 3  |
|      | chr12 | + | 110796446,110784639,110787862           | 110796530,110784752,110788020           | 11 |
|      | chr12 | + | 110809600,110787500,110809600           | 110809935,110787581,110809935           | 1  |
|      | chr12 | + | 110809600,110787862,110809600           | 110809935,110788020,110809935           | 2  |
| 5348 | chr12 | + | 110980271,110981875,110986334           | 110980500,110982057,110986503           | 1  |
| 5354 | chr12 | + | 111855829,111890283                     | 111856906,111890404                     | 1  |
|      | chr12 | + | 111863636,111896550                     | 111863813,111896804                     | 1  |
|      | chr12 | + | 111868032,111880220                     | 111868206,111880386                     | 1  |
|      | chr12 | + | 111890283,111904772                     | 111890404,111905154                     | 1  |
|      | chr12 | + | 111895252,111897108                     | 111895406,111897203                     | 1  |
|      | chr12 | + | 111896051,111896882                     | 111896198,111897017                     | 1  |
| 5367 | chr12 | + | 112509321,112513367                     | 112509375,112513450                     | 1  |
|      | chr12 | + | 112513367,112514226                     | 112513450,112514637                     | 1  |
|      | chr12 | + | 112513782,112514226                     | 112513960,112514637                     | 1  |
| 5382 | chr12 | + | 112960822,112968232                     | 112961020,112968323                     | 1  |
| 5383 | chr12 | + | 113015022,113025698                     | 113015248,113025807                     | 1  |
|      | chr12 | + | 113023482,113032547                     | 113023532,113033110                     | 1  |
|      | chr12 | + | 113025698,113027535,113044218           | 113025807,113027670,113044285           | 2  |
|      | chr12 | + | 113025698,113027559,113032547           | 113025807,113027697,113033110           | 1  |
|      | chr12 | + | 113025698,113027559,113044218           | 113025807,113027697,113044285           | 2  |
|      | chr12 | + | 113027535,113033758,113025698           | 113027670,113033889,113025807           | 1  |
|      | chr12 | + | 113027535,113033758,113044218,113044525 | 113027670,113033889,113044285,113044986 | 1  |
|      | chr12 | + | 113027535,113044218,113025698           | 113027670,113044285,113025807           | 3  |
|      | chr12 | + | 113032547,113016230,113032547           | 113033110,113016318,113033110           | 2  |
|      | chr12 | + | 113032547,113027559,113032547           | 113033110,113027697,113033110           | 1  |
| 538  | chr1  | + | 87973930,87982604                       | 87974074,87982683                       | 1  |
|      | chr1  | + | 87986568,88015084                       | 87986765,88015201                       | 2  |
| 5393 | chr12 | + | 113406978,113411551                     | 113407168,113411645                     | 1  |
| 53   | chr1  | - | 16092772,16091378                       | 16092910,16091440                       | 1  |
| 5401 | chr12 | - | 113897339,113894987                     | 113897487,113895202                     | 1  |
|      | chr12 | - | 113912210,113895478                     | 113912401,113895604                     | 1  |
| 5412 | chr12 | - | 114172943,114177005,114172943           | 114173261,114177070,114173261           | 1  |
|      | chr12 | - | 114180201,114177005,114172943           | 114180329,114177070,114173261           | 4  |
| 5413 | chr12 | - | 114201587,114200586,114200586,114199320 | 114201643,114200843,114200843,114199492 | 1  |
|      | chr12 | - | 114203939,114201587                     | 114204203,114201643                     | 1  |
| 5415 | chr12 | + | 114288727,114300059                     | 114288801,114300166                     | 1  |
| 5417 | chr12 | + | 114350356,114369783                     | 114350424,114369973                     | 1  |
|      | chr12 | + | 114369526,114374491                     | 114369678,114374643                     | 1  |
|      | chr12 | + | 114370098,114374491                     | 114370188,114374643                     | 1  |
| 5418 | chr12 | + | 114378757,114382609                     | 114378825,114382704                     | 7  |
|      | chr12 | + | 114381669,114383173                     | 114381822,114383717                     | 15 |
| 5422 | chr12 | - | 114667295,114652482                     | 114667344,114652803                     | 1  |

|      |       |   |                                     |                                     |   |
|------|-------|---|-------------------------------------|-------------------------------------|---|
| 5423 | chr12 | - | 114656769,114656769,114545034       | 114657045,114657045,114545045       | 3 |
|      | chr12 | - | 114657163,114659076                 | 114657279,114659472                 | 1 |
|      | chr12 | - | 114806242,114659579                 | 114806253,114659897                 | 1 |
|      | chr12 | - | 115045912,114599152                 | 115045958,114599443                 | 1 |
|      | chr12 | - | 116784201,116148477                 | 116784212,116148514                 | 2 |
| 5438 | chr12 | + | 118114462,118139440,118114462       | 118114845,118139520,118114845       | 3 |
| 5442 | chr12 | + | 118814027,118896750                 | 118814078,118896876                 | 1 |
| 5453 | chr13 | + | 3561111,3564241                     | 3561283,3565507                     | 2 |
| 5470 | chr13 | - | 4598015,4592807                     | 4598138,4592890                     | 1 |
|      | chr13 | - | 4598015,4594316                     | 4598138,4594400                     | 1 |
| 5473 | chr13 | + | 5864013,5866477                     | 5864590,5869639                     | 1 |
| 5474 | chr13 | + | 6573605,6576635,6577686             | 6573677,6576761,6577832             | 1 |
| 5475 | chr13 | - | 6588284,6587734                     | 6593150,6587899                     | 4 |
|      | chr13 | - | 6604201,6581648                     | 6604327,6581751                     | 1 |
|      | chr13 | - | 6618765,6579119                     | 6618810,6580838                     | 1 |
| 5478 | chr13 | - | 8834542,8802213                     | 8834684,8805192                     | 1 |
|      | chr13 | - | 8849724,8836028,8849724             | 8852980,8836269,8852980             | 3 |
| 547  | chr1  | - | 88439589,88443231,88439589          | 88440158,88443357,88440158          | 1 |
| 5482 | chr13 | - | 8984454,8978674                     | 8984565,8978726                     | 1 |
| 5485 | chr13 | - | 9692675,9694383                     | 9692794,9694547                     | 1 |
| 5488 | chr13 | - | 11903149,11650313                   | 11903245,11650378                   | 1 |
| 5491 | chr13 | + | 12518420,12526183                   | 12518547,12526318                   | 1 |
| 5507 | chr13 | - | 14107001,14093376,14090629,14090217 | 14107090,14093445,14090721,14090448 | 1 |
| 5508 | chr13 | - | 14144544,14144713                   | 14144660,14146722                   | 7 |
| 550  | chr1  | + | 88750934,88944262                   | 88751035,88944367                   | 1 |
|      | chr1  | + | 88869974,88917612,88940591          | 88870082,88917692,88940775          | 1 |
| 5524 | chr13 | - | 17988786,17972408                   | 17988936,17974335                   | 1 |
|      | chr13 | - | 18035850,17980340                   | 18036051,17980515                   | 1 |
| 5527 | chr13 | + | 18903435,18957988                   | 18903582,18958670                   | 1 |
|      | chr13 | + | 18946393,18955901                   | 18946530,18955981                   | 2 |
| 5528 | chr13 | + | 19194740,19204971                   | 19194879,19205088                   | 1 |
| 5537 | chr13 | - | 19459612,19461290                   | 19459708,19465082                   | 2 |
|      | chr13 | - | 19468247,19462118                   | 19468530,19462236                   | 1 |
| 553  | chr1  | - | 88996645,88995944                   | 88996780,88996136                   | 1 |
| 5549 | chr13 | + | 21271827,21283088                   | 21272783,21283115                   | 1 |
| 561  | chr1  | + | 89276542,89330254                   | 89276583,89330491                   | 4 |
| 566  | chr1  | + | 89595602,89614264                   | 89595699,89614859                   | 1 |
| 5677 | chr13 | - | 24372429,24114364                   | 24372659,24114505                   | 1 |
| 570  | chr1  | - | 89894387,89841695                   | 89894534,89843282                   | 1 |
| 5725 | chr13 | + | 29120290,29108161,29115044          | 29120666,29108260,29115081          | 1 |
| 5747 | chr13 | - | 32939258,32933960                   | 32939376,32935091                   | 1 |
| 5767 | chr13 | + | 34165544,34152302,34165544          | 34165943,34152434,34165943          | 1 |
| 5776 | chr13 | + | 34993261,34995055                   | 34994902,34995142                   | 4 |
| 5781 | chr13 | - | 35072130,35069617                   | 35072220,35069935                   | 1 |
| 5787 | chr13 | - | 35995556,35990683                   | 35995625,35990882                   | 1 |
| 5799 | chr13 | - | 38077843,38075261                   | 38077920,38075355                   | 1 |
| 57   | chr1  | - | 16635766,16632845,16647072,16646902 | 16635910,16633559,16647123,16646946 | 2 |
|      | chr1  | - | 16647072,16646902,16635766,16632845 | 16647123,16646946,16635910,16633559 | 2 |
| 5800 | chr13 | - | 38108279,38104260                   | 38108360,38104365                   | 1 |
| 5803 | chr13 | + | 38312556,38318742                   | 38312645,38319532                   | 2 |
| 5815 | chr13 | + | 41100105,41107933                   | 41100268,41108380                   | 1 |
| 5828 | chr13 | + | 42961615,43190117                   | 42961856,43190365                   | 1 |
|      | chr13 | + | 43051985,43218367                   | 43052150,43218423                   | 1 |
|      | chr13 | + | 43051985,43229295                   | 43054270,43229372                   | 3 |
|      | chr13 | + | 43051985,43230542                   | 43052150,43233881                   | 2 |
|      | chr13 | + | 43192018,43230542                   | 43192175,43233881                   | 1 |
| 5832 | chr13 | + | 43495961,43496665                   | 43495990,43496787                   | 1 |
| 5847 | chr13 | + | 45616220,45634393                   | 45616394,45634436                   | 1 |
|      | chr13 | + | 45627662,45616495                   | 45627769,45616588                   | 1 |
| 5859 | chr13 | - | 47196990,47193522                   | 47197100,47193711                   | 1 |
|      | chr13 | - | 47200939,47183393                   | 47201105,47183542                   | 1 |
| 5869 | chr13 | - | 48908277,48899703                   | 48908438,48900091                   | 1 |
|      | chr13 | - | 48915409,48899703                   | 48915516,48900091                   | 1 |
| 5872 | chr13 | - | 49137996,49147927,49137996          | 49138235,49148142,49138235          | 3 |
|      | chr13 | - | 49145852,49137996,49137996          | 49145951,49138235,49138235          | 1 |
|      | chr13 | - | 49145852,49137996                   | 49145951,49138235                   | 1 |

|      |       |   |                                     |                                     |    |
|------|-------|---|-------------------------------------|-------------------------------------|----|
|      | chr13 | - | 49146725,49139742,49137996          | 49146896,49139787,49138235          | 4  |
|      | chr13 | - | 49155719,49131670                   | 49155795,49131874                   | 1  |
|      | chr13 | - | 49162615,49146725                   | 49162735,49146896                   | 1  |
| 5874 | chr13 | - | 49298319,49300560,49299086          | 49298604,49300714,49299158          | 1  |
|      | chr13 | - | 49303372,49300560,49300560,49299086 | 49303515,49300714,49300714,49299158 | 2  |
| 5876 | chr13 | - | 49373882,49371984                   | 49373975,49372985                   | 2  |
| 5878 | chr13 | + | 49541671,49553981                   | 49541945,49554061                   | 1  |
| 5884 | chr13 | + | 49759422,49773754                   | 49759536,49774384                   | 1  |
| 5939 | chr13 | + | 51196266,51234725                   | 51196359,51234979                   | 1  |
| 5950 | chr13 | + | 52192109,52217525                   | 52192209,52218110                   | 1  |
| 5957 | chr13 | - | 52936245,52930478                   | 52936433,52930920                   | 2  |
| 595  | chr1  | + | 92965139,93024662                   | 92965226,93025495                   | 1  |
|      | chr1  | + | 92990136,93006931                   | 92990214,93007024                   | 1  |
|      | chr1  | + | 93006931,93011172                   | 93007024,93013498                   | 1  |
| 5974 | chr13 | + | 54180817,54201875                   | 54180992,54203711                   | 1  |
| 5984 | chr13 | - | 54697400,54694299                   | 54700194,54695403                   | 11 |
| 5985 | chr13 | + | 54751338,54762314                   | 54751424,54765424                   | 1  |
| 5995 | chr13 | + | 55104193,55105138                   | 55104362,55105303                   | 2  |
| 5997 | chr13 | - | 55177662,55130776                   | 55177768,55130819                   | 1  |
| 6000 | chr13 | + | 55313430,55384019                   | 55313468,55384143                   | 1  |
| 6001 | chr13 | - | 55422105,55420583                   | 55422205,55421575                   | 1  |
| 6009 | chr13 | + | 55560153,55560693,55561144          | 55560291,55560920,55562287          | 2  |
| 6011 | chr13 | - | 55575147,55582899,55575816          | 55575654,55583051,55575922          | 1  |
|      | chr13 | - | 55577996,55575816,55575147          | 55578134,55575922,55575654          | 1  |
|      | chr13 | - | 55578911,55575147                   | 55579041,55575654                   | 1  |
|      | chr13 | - | 55582899,55575816                   | 55583051,55575922                   | 1  |
|      | chr13 | - | 55583273,55576220                   | 55583351,55576897                   | 1  |
|      | chr13 | - | 55583511,55577506                   | 55583658,55577677                   | 2  |
|      | chr13 | - | 55583773,55575147                   | 55583848,55575654                   | 2  |
|      | chr13 | - | 55584747,55578911                   | 55584803,55579041                   | 1  |
|      | chr13 | - | 55589223,55575147                   | 55589317,55575654                   | 1  |
|      | chr13 | - | 55589223,55578911                   | 55589317,55579041                   | 1  |
| 6012 | chr13 | - | 55608690,55608133                   | 55608985,55608484                   | 3  |
|      | chr13 | - | 55609224,55608690                   | 55609241,55608985                   | 3  |
|      | chr13 | - | 55609568,55608690                   | 55609687,55608985                   | 1  |
| 6015 | chr13 | - | 55651584,55640679                   | 55651768,55641073                   | 1  |
| 6019 | chr13 | + | 55762077,55780144                   | 55762160,55780476                   | 1  |
| 6027 | chr13 | - | 56191118,56189612                   | 56191218,56189703                   | 2  |
|      | chr13 | - | 56197484,56191118                   | 56197592,56191218                   | 1  |
| 6039 | chr13 | - | 57527454,57527454,57522555          | 57530846,57530846,57524554          | 5  |
| 6043 | chr13 | - | 58284542,58277522                   | 58284685,58279389                   | 1  |
| 6044 | chr13 | - | 58345162,58340009,58337877,58334711 | 58345315,58340073,58337955,58335019 | 1  |
| 604  | chr1  | - | 93272407,93272407,93270437          | 93272659,93272659,93272115          | 1  |
|      | chr1  | - | 93278427,93272894                   | 93278549,93272976                   | 1  |
|      | chr1  | - | 93278427,93275042,93283791,93279880 | 93278549,93275162,93283918,93279968 | 1  |
|      | chr1  | - | 93281816,93272407                   | 93281923,93272659                   | 1  |
| 6052 | chr13 | + | 59033383,59033383,59087162          | 59038392,59038392,59087351          | 1  |
| 6054 | chr13 | - | 59550895,59567345,59550895          | 59551675,59567477,59551675          | 5  |
|      | chr13 | - | 59634532,59577020                   | 59634600,59577174                   | 1  |
| 6069 | chr13 | + | 60827176,60830737                   | 60827275,60830935                   | 1  |
| 6101 | chr13 | - | 63423174,63417807                   | 63423352,63418864                   | 1  |
| 6105 | chr13 | - | 64165656,64164187                   | 64165691,64164253                   | 1  |
| 6108 | chr13 | + | 64263476,64283414                   | 64263642,64283586                   | 1  |
| 6132 | chr13 | - | 67029105,67022124                   | 67029223,67023881                   | 3  |
| 6133 | chr13 | + | 67046212,67097903                   | 67046304,67099337                   | 1  |
| 6168 | chr13 | - | 68719427,68716464,68711454          | 68719592,68716582,68711577          | 1  |
| 616  | chr1  | - | 93878605,93831178                   | 93878829,93831263                   | 1  |
| 6212 | chr13 | - | 74474838,74469546                   | 74474987,74469742                   | 1  |
|      | chr13 | - | 74480784,74465744                   | 74480946,74465863                   | 1  |
| 6218 | chr13 | - | 74885652,74862225                   | 74885691,74862309                   | 1  |
| 6246 | chr13 | - | 81581464,81513180                   | 81581613,81513281                   | 1  |
|      | chr13 | - | 81705260,81642001                   | 81705424,81642143                   | 1  |
| 6252 | chr13 | + | 83659383,83795111                   | 83659479,83795241                   | 3  |
|      | chr13 | + | 83663909,83714692                   | 83664136,83714888                   | 4  |
|      | chr13 | + | 83732038,83764759,83732038          | 83732242,83764903,83732242          | 1  |
|      | chr13 | + | 83732038,83764759                   | 83732242,83764903                   | 12 |



|      |       |   |                                     |                                     |    |
|------|-------|---|-------------------------------------|-------------------------------------|----|
|      | chr13 | + | 83764759,83732038                   | 83764903,83732242                   | 26 |
|      | chr13 | + | 83764759,83764964                   | 83764903,83765102                   | 4  |
| 6257 | chr13 | + | 85341937,85352344                   | 85342101,85353328                   | 1  |
|      | chr13 | + | 85348382,85352344                   | 85348494,85353328                   | 1  |
|      | chr13 | + | 85352344,85351458                   | 85353328,85352216                   | 1  |
| 6258 | chr13 | - | 85369209,85361075                   | 85369287,85361143                   | 2  |
|      | chr13 | - | 85395943,85369209                   | 85396079,85369287                   | 2  |
| 6268 | chr13 | - | 91293821,91076897,91076191,91074953 | 91293917,91076995,91076307,91075850 | 1  |
| 6282 | chr13 | - | 93289421,93278076                   | 93289518,93278301                   | 1  |
| 6302 | chr13 | + | 95187915,95249681                   | 95188098,95249829                   | 1  |
|      | chr13 | + | 95335559,95216020,95317709          | 95336270,95216092,95317848          | 1  |
| 6332 | chr13 | - | 98751326,98668549                   | 98751369,98669771                   | 1  |
|      | chr13 | - | 98785969,98748384                   | 98786062,98748508                   | 1  |
| 6334 | chr13 | + | 99038384,99042726                   | 99038450,99042807                   | 1  |
|      | chr13 | + | 99041009,99036105                   | 99041107,99037672                   | 2  |
| 6346 | chr13 | - | 100109855,100091515                 | 100109985,100091629                 | 1  |
| 6355 | chr13 | - | 100829443,100822927                 | 100829625,100823073                 | 1  |
|      | chr13 | - | 100835831,100787948                 | 100836021,100790365                 | 1  |
| 6357 | chr13 | + | 100896541,100905643                 | 100896613,100905694                 | 2  |
| 6362 | chr13 | - | 101240833,101231802                 | 101240873,101231917                 | 1  |
|      | chr13 | - | 101250958,101246424                 | 101251046,101246527                 | 2  |
| 6378 | chr13 | - | 104123915,103544135                 | 104124541,103544336                 | 1  |
| 6381 | chr13 | - | 104554375,104531694                 | 104554499,104533796                 | 1  |
| 6382 | chr13 | - | 104623577,104613393                 | 104625108,104613486                 | 1  |
|      | chr13 | - | 104658899,104652359                 | 104658978,104652423                 | 2  |
| 6383 | chr13 | - | 104899495,104813518                 | 104899694,104815160                 | 1  |
| 6391 | chr13 | - | 105510501,105582578                 | 105510599,105584573                 | 1  |
| 6395 | chr13 | - | 105843037,105737232                 | 105843204,105741662                 | 1  |
| 6401 | chr13 | - | 107765450,107762734                 | 107765561,107764642                 | 3  |
| 6411 | chr13 | - | 108948636,108871546                 | 108948785,108871587                 | 2  |
| 6425 | chr13 | + | 112478035,112493836                 | 112478060,112493971                 | 1  |
| 6435 | chr13 | - | 113700023,113664803                 | 113700122,113664860                 | 1  |
| 6439 | chr13 | - | 113836379,113832970,113832970       | 113836596,113833507,113833507       | 2  |
| 6448 | chr13 | - | 115107064,115078857,115078857       | 115107237,115079074,115079074       | 3  |
|      | chr13 | + | 115141655,115078857                 | 115141734,115079074                 | 2  |
| 6468 | chr13 | + | 120255673,120273259                 | 120255763,120273300                 | 2  |
| 6535 | chr14 | + | 8766227,8778308                     | 8766494,8778527                     | 1  |
| 6547 | chr14 | - | 11994447,10596253                   | 11994546,10596322                   | 1  |
| 6551 | chr14 | - | 13286677,13273354                   | 13286833,13273429                   | 1  |
| 6556 | chr14 | - | 14785589,14782645                   | 14785676,14782715                   | 1  |
|      | chr14 | - | 14790067,14789973                   | 14790145,14790049                   | 1  |
| 6558 | chr14 | - | 14949338,14944698                   | 14949484,14944900                   | 1  |
|      | chr14 | - | 14952500,14948897                   | 14952706,14949117                   | 3  |
| 6561 | chr14 | + | 15184430,15187520,15179008,15183563 | 15184533,15187587,15179026,15183678 | 1  |
| 6562 | chr14 | + | 15572238,15623580                   | 15572388,15623678                   | 2  |
| 6568 | chr14 | + | 17230296,17253216                   | 17230435,17253378                   | 1  |
|      | chr14 | + | 17244569,17260987                   | 17244704,17261113                   | 1  |
|      | chr14 | + | 17246415,17260987                   | 17246507,17261113                   | 2  |
|      | chr14 | + | 17246415,17261851                   | 17246507,17261946                   | 1  |
| 6608 | chr14 | + | 21170533,21178976                   | 21170638,21179138                   | 1  |
|      | chr14 | + | 21193551,21187067                   | 21193676,21188406                   | 2  |
| 6613 | chr14 | - | 21278013,21277791                   | 21279456,21277904                   | 1  |
| 6624 | chr14 | + | 21531258,21537648                   | 21531340,21537889                   | 1  |
|      | chr14 | + | 21537981,21541091                   | 21538140,21541251                   | 3  |
|      | chr14 | + | 21537981,21541091,21541364          | 21538140,21541251,21541541          | 1  |
|      | chr14 | + | 21537981,21542360                   | 21538140,21542840                   | 1  |
| 6626 | chr14 | - | 21558070,21567040,21563825          | 21558165,21567073,21563870          | 1  |
|      | chr14 | - | 21558548,21567040,21563825          | 21558624,21567073,21563870          | 1  |
|      | chr14 | - | 21567040,21563825,21558070          | 21567073,21563870,21558165          | 2  |
|      | chr14 | - | 21567040,21563825,21558548,21558070 | 21567073,21563870,21558624,21558165 | 5  |
|      | chr14 | - | 21583367,21567040,21563825          | 21583490,21567073,21563870          | 1  |
|      | chr14 | - | 21613122,21558548                   | 21613310,21558624                   | 1  |
| 662  | chr1  | - | 94960725,94915528                   | 94960859,94915647                   | 1  |
|      | chr1  | - | 94970384,94959443                   | 94970462,94959523                   | 1  |
|      | chr1  | - | 94972727,94936321                   | 94972906,94936430                   | 1  |
|      | chr1  | - | 94975337,94963632                   | 94975414,94963711                   | 2  |

|      |       |   |                                     |                                     |   |
|------|-------|---|-------------------------------------|-------------------------------------|---|
|      | chr1  | - | 94978892,94959076                   | 94979057,94959152                   | 1 |
| 6631 | chr14 | + | 22054054,22242724                   | 22054227,22242811                   | 1 |
| 6637 | chr14 | + | 22657612,22664367,22664367          | 22657840,22665101,22665101          | 1 |
| 669  | chr1  | + | 95246901,95250905                   | 95246957,95251022                   | 1 |
|      | chr1  | + | 95249093,95254333,95248082          | 95249256,95254438,95248213          | 6 |
| 670  | chr1  | + | 95286855,95299217                   | 95287021,95299337                   | 1 |
| 674  | chr1  | - | 95521129,95517327                   | 95521201,95519103                   | 4 |
|      | chr1  | - | 95523601,95522357,95522357          | 95523710,95522543,95522543          | 2 |
|      | chr1  | - | 95525610,95521129                   | 95525841,95521201                   | 1 |
| 6761 | chr14 | + | 25312604,25312604,25309902,25312604 | 25315081,25312715,25309980,25315081 | 1 |
| 6770 | chr14 | + | 26518952,26515489,26517751          | 26519952,26515578,26517827          | 1 |
| 6792 | chr14 | + | 27425361,27446804                   | 27425424,27446907                   | 1 |
| 679  | chr1  | - | 95691302,95695352                   | 95691500,95695940                   | 6 |
|      | chr1  | - | 95695352,95691302                   | 95695940,95691500                   | 7 |
| 6800 | chr14 | - | 27778044,27738602                   | 27778143,27738692                   | 1 |
| 6804 | chr14 | + | 28251784,28263131                   | 28251930,28263235                   | 1 |
| 6808 | chr14 | - | 29918139,29858734                   | 29918211,29858856                   | 1 |
|      | chr14 | - | 29937851,29769977                   | 29937869,29770053                   | 1 |
|      | chr14 | - | 29937851,29782343                   | 29937869,29782414                   | 1 |
|      | chr14 | - | 30113922,29721173                   | 30114012,29721254                   | 2 |
| 6814 | chr14 | - | 30937967,30915530                   | 30938128,30915638                   | 1 |
| 6816 | chr14 | + | 31362334,31382160                   | 31362566,31382325                   | 1 |
|      | chr14 | + | 31371906,31384148                   | 31372024,31384232                   | 1 |
|      | chr14 | + | 31373772,31383141                   | 31373870,31383298                   | 1 |
|      | chr14 | + | 31381349,31384337                   | 31381543,31384431                   | 2 |
|      | chr14 | + | 31383388,31385393                   | 31383519,31385516                   | 1 |
| 6817 | chr14 | - | 31408554,31411592                   | 31409211,31411814                   | 1 |
| 681  | chr1  | + | 95747143,95813088                   | 95748612,95814696                   | 1 |
| 6826 | chr14 | + | 31770447,31783348                   | 31770555,31783750                   | 2 |
| 6828 | chr14 | + | 31823482,31824049                   | 31823983,31824216                   | 2 |
| 6830 | chr14 | + | 31859517,31897259                   | 31859609,31897417                   | 1 |
|      | chr14 | + | 31869421,31900701                   | 31869466,31900847                   | 1 |
| 6832 | chr14 | + | 31951517,31951966                   | 31951658,31952310                   | 2 |
| 6833 | chr14 | - | 31960672,31953994                   | 31960798,31954128                   | 1 |
|      | chr14 | - | 31968014,31959852                   | 31968201,31959975                   | 1 |
|      | chr14 | - | 31975296,31958260                   | 31975407,31958320                   | 1 |
|      | chr14 | - | 31975296,31964869                   | 31975407,31964917                   | 1 |
| 6834 | chr14 | - | 31998127,31984113                   | 31998236,31985364                   | 1 |
| 6838 | chr14 | + | 32068698,32071066                   | 32068846,32071227                   | 1 |
| 6842 | chr14 | + | 32158644,32171791                   | 32158712,32171938                   | 1 |
| 6844 | chr14 | - | 32300756,32291983,32291983          | 32300927,32292996,32292996          | 1 |
|      | chr14 | - | 32305507,32300756,32291983          | 32305642,32300927,32292996          | 1 |
| 6849 | chr14 | - | 32592107,32561828                   | 32592191,32562029                   | 1 |
| 6850 | chr14 | + | 32853541,32865483                   | 32853708,32865615                   | 1 |
| 6858 | chr14 | + | 33140164,33148520                   | 33140335,33148611                   | 1 |
| 6869 | chr14 | - | 33802071,33773927                   | 33802191,33774039                   | 1 |
| 6897 | chr14 | + | 35504867,35552416                   | 35505920,35552624                   | 1 |
| 6901 | chr14 | - | 37751769,37688121,37688121          | 37751966,37692948,37692948          | 1 |
| 6916 | chr14 | + | 41918669,41928011                   | 41918973,41928155                   | 1 |
| 7010 | chr14 | - | 45767503,45761647,45760092          | 45767588,45761808,45760283          | 1 |
| 7015 | chr14 | + | 45950504,45954327                   | 45950584,45954395                   | 2 |
|      | chr14 | + | 45954591,45963075                   | 45954706,45963196                   | 2 |
|      | chr14 | + | 45963075,45966418                   | 45963196,45966490                   | 1 |
| 7016 | chr14 | + | 45990693,45993186                   | 45990766,45996559                   | 1 |
| 7021 | chr14 | - | 46238943,46224727                   | 46239091,46224877                   | 1 |
| 7032 | chr14 | - | 47892541,47864659                   | 47892592,47864787                   | 1 |
| 7036 | chr14 | - | 48007453,48009041                   | 48007798,48010337                   | 5 |
| 7039 | chr14 | + | 48292614,48352901                   | 48292745,48352997                   | 1 |
|      | chr14 | + | 48296359,48305930                   | 48296500,48306018                   | 1 |
| 7083 | chr14 | + | 51438884,51440469                   | 51438948,51440594                   | 3 |
| 7116 | chr14 | + | 52508821,52509537                   | 52509072,52509606                   | 1 |
|      | chr14 | + | 52509202,52508821                   | 52509310,52509072                   | 1 |
| 7118 | chr14 | - | 52529732,52526920                   | 52529795,52526972                   | 1 |
| 7121 | chr14 | + | 52615938,52624663                   | 52616082,52624710                   | 1 |
|      | chr14 | + | 52623647,52624286,52617287,52623328 | 52623791,52624417,52617522,52623433 | 1 |
| 7127 | chr14 | - | 52797958,52794916                   | 52798032,52795044                   | 1 |

|      |       |   |                                     |                                     |    |
|------|-------|---|-------------------------------------|-------------------------------------|----|
| 7129 | chr14 | - | 52822178,52821305,52821305,52817825 | 52822292,52821422,52821422,52818827 | 5  |
|      | chr14 | - | 52854798,52846287                   | 52855176,52846343                   | 1  |
| 7132 | chr14 | - | 52917145,52916338,52915748          | 52917333,52916447,52915861          | 1  |
| 7237 | chr14 | - | 55130829,55128125                   | 55130991,55128242                   | 1  |
|      | chr14 | - | 55136083,55126305                   | 55136244,55126784                   | 1  |
| 7238 | chr14 | - | 55168730,55161219                   | 55168873,55161288                   | 1  |
| 7251 | chr14 | - | 55527659,55527097                   | 55527825,55527203                   | 1  |
| 7255 | chr14 | - | 55585390,55581857                   | 55585408,55581969                   | 1  |
| 7262 | chr14 | - | 55730136,55725662                   | 55733015,55727232                   | 1  |
|      | chr14 | - | 55733732,55730136                   | 55734389,55733015                   | 1  |
| 7264 | chr14 | + | 56106028,56104953                   | 56106148,56105055                   | 1  |
| 7265 | chr14 | + | 56115623,56125954                   | 56115700,56126073                   | 2  |
|      | chr14 | + | 56122673,56124236                   | 56122989,56124303                   | 1  |
|      | chr14 | + | 56125954,56126521                   | 56126073,56126641                   | 1  |
|      | chr14 | + | 56125954,56126521,56126521          | 56126073,56126641,56126641          | 1  |
|      | chr14 | + | 56126213,56126756                   | 56126394,56127101                   | 1  |
| 7266 | chr14 | + | 56130817,56133401                   | 56130989,56133488                   | 1  |
|      | chr14 | + | 56132008,56136068                   | 56132083,56136267                   | 1  |
| 7271 | chr14 | + | 56198950,56199431                   | 56198996,56199500                   | 1  |
| 7273 | chr14 | - | 56208455,56206876                   | 56208542,56206931                   | 1  |
|      | chr14 | - | 56209858,56208869                   | 56209938,56208932                   | 1  |
| 7274 | chr14 | + | 56211297,56220717                   | 56211453,56220775                   | 1  |
| 7276 | chr14 | + | 56243185,56243909                   | 56243234,56244016                   | 1  |
| 7277 | chr14 | - | 56248585,56246942                   | 56248704,56247068                   | 4  |
| 7282 | chr14 | - | 56290631,56281103                   | 56290743,56281462                   | 2  |
|      | chr14 | - | 56290631,56282251                   | 56290743,56282334                   | 1  |
| 7286 | chr14 | - | 56337700,56334713                   | 56337789,56335375                   | 1  |
| 7287 | chr14 | - | 56362494,56357856                   | 56362638,56358257                   | 3  |
| 7294 | chr14 | + | 56443844,56452393                   | 56443973,56452780                   | 1  |
| 7298 | chr14 | - | 56516121,56519026,56517079          | 56516849,56519069,56517223          | 1  |
|      | chr14 | - | 56517079,56518483                   | 56517314,56518566                   | 3  |
|      | chr14 | - | 56518483,56517079                   | 56518566,56517314                   | 1  |
|      | chr14 | - | 56518483,56518650                   | 56518566,56519016                   | 1  |
| 7317 | chr14 | - | 57177409,57168260                   | 57177673,57168393                   | 1  |
| 7320 | chr14 | + | 57291241,57315495                   | 57291397,57315579                   | 2  |
| 7325 | chr14 | + | 57560834,57578551                   | 57560964,57579186                   | 1  |
| 7331 | chr14 | + | 58098733,58126041                   | 58098842,58126108                   | 1  |
|      | chr14 | + | 58126041,58136173,58107728          | 58126108,58136773,58107794          | 1  |
|      | chr14 | + | 58126041,58136173,58136173          | 58126108,58136773,58136773          | 2  |
| 7333 | chr14 | - | 58190379,58176870,58169198          | 58190406,58176953,58169479          | 1  |
| 7340 | chr14 | - | 58465757,58457926                   | 58465899,58458042                   | 1  |
|      | chr14 | - | 58497269,58451538                   | 58497296,58455483                   | 1  |
| 7351 | chr14 | - | 60203409,60200161                   | 60205445,60200211                   | 1  |
| 7368 | chr14 | - | 61993120,61989219                   | 61993252,61989382                   | 1  |
| 7369 | chr14 | - | 62164518,62153141                   | 62164685,62154078                   | 1  |
| 736  | chr1  | + | 120285634,120403516                 | 120286098,120403594                 | 1  |
| 7376 | chr14 | + | 62979299,62982866                   | 62979364,62982948                   | 1  |
| 7388 | chr14 | + | 63752801,63757187                   | 63752887,63757331                   | 1  |
|      | chr14 | + | 63756869,63761068                   | 63756955,63764758                   | 1  |
| 7389 | chr14 | - | 63763987,63775395,63769986          | 63765805,63775587,63770139          | 1  |
| 7424 | chr14 | + | 66590568,66599690                   | 66590689,66599866                   | 1  |
|      | chr14 | + | 66592161,66595742                   | 66592310,66595847                   | 4  |
| 7429 | chr14 | - | 66789074,66777220                   | 66789164,66777256                   | 1  |
|      | chr14 | - | 66832148,66790895                   | 66832389,66790996                   | 1  |
| 7435 | chr14 | - | 67447607,67431962                   | 67447676,67432133                   | 1  |
| 7462 | chr14 | + | 70075482,70092120                   | 70075650,70092232                   | 1  |
| 7464 | chr14 | - | 70119205,70116806                   | 70119304,70118107                   | 1  |
| 7471 | chr14 | - | 70539793,70537975                   | 70539940,70538754                   | 1  |
|      | chr14 | - | 70552179,70542731                   | 70552271,70542895                   | 1  |
| 7487 | chr14 | + | 70977653,70979140                   | 70977917,70982378                   | 1  |
| 7489 | chr14 | - | 71003477,71005499                   | 71004661,71005548                   | 1  |
|      | chr14 | - | 71005499,71003477                   | 71005548,71004661                   | 6  |
|      | chr14 | - | 71012474,71005103                   | 71012580,71005172                   | 17 |
| 7492 | chr14 | - | 71070858,71071137                   | 71071073,71071538                   | 1  |
| 7499 | chr14 | + | 73564490,73582265                   | 73564657,73583500                   | 1  |
| 7503 | chr14 | - | 73766127,73764348                   | 73766334,73764499                   | 1  |

|      |       |   |                                         |                                         |   |
|------|-------|---|-----------------------------------------|-----------------------------------------|---|
|      | chr14 | - | 73784816,73765558                       | 73785078,73765669                       | 2 |
| 7506 | chr14 | + | 73990816,73995180                       | 73990959,73995280                       | 3 |
| 7518 | chr14 | + | 75684179,75709451                       | 75684472,75709609                       | 2 |
|      | chr14 | + | 75721403,75724219                       | 75721711,75724411                       | 1 |
| 751  | chr1  | - | 122012962,122009856,122017521,122017338 | 122013025,122010110,122017656,122017496 | 7 |
| 752  | chr1  | + | 122017771,122084617                     | 122017794,122084766                     | 1 |
| 7532 | chr14 | - | 76956571,76956237                       | 76956696,76956509                       | 1 |
| 7536 | chr14 | + | 77711865,78015245                       | 77711931,78015363                       | 2 |
|      | chr14 | + | 78015245,78064425                       | 78015363,78064533                       | 1 |
| 7557 | chr14 | + | 79987497,79995175,79996554,79997202     | 79987673,79995266,79996624,79997273     | 1 |
| 7568 | chr14 | + | 87885365,87939203                       | 87885506,87939328                       | 1 |
| 7579 | chr14 | - | 99478346,99475852                       | 99478505,99476684                       | 1 |
|      | chr14 | - | 99485092,99478346                       | 99485177,99478505                       | 2 |
|      | chr14 | - | 99485092,99478883                       | 99485177,99479098                       | 1 |
| 758  | chr1  | - | 123224097,123224267                     | 123224255,123224339                     | 2 |
| 7594 | chr14 | - | 103540087,103534250                     | 103540153,103534517                     | 1 |
|      | chr14 | - | 103619143,103541960                     | 103619356,103542185                     | 1 |
|      | chr14 | - | 103745432,103542359                     | 103746017,103542516                     | 1 |
| 7629 | chr14 | - | 119311663,119321464                     | 119312972,119322013                     | 1 |
| 7630 | chr14 | + | 119337208,119375931                     | 119337392,119376080                     | 1 |
| 7646 | chr14 | - | 122039183,121977376                     | 122039381,121977434                     | 1 |
| 7661 | chr14 | + | 122933564,123137123                     | 122933681,123137226                     | 1 |
|      | chr14 | + | 122933564,123212415                     | 122933681,123212469                     | 1 |
|      | chr14 | + | 123049473,123286268                     | 123049552,123286346                     | 1 |
|      | chr14 | + | 123085324,123286268                     | 123085399,123286346                     | 1 |
| 7676 | chr15 | + | 3987090,4051803                         | 3987181,4051879                         | 1 |
|      | chr15 | + | 3997464,4051803                         | 3997600,4051879                         | 1 |
|      | chr15 | + | 4041167,4051126                         | 4041275,4051199                         | 1 |
|      | chr15 | + | 4092791,4103727,4103727                 | 4092872,4105341,4105341                 | 1 |
| 7698 | chr15 | - | 8042228,8042228,8032461                 | 8043115,8043115,8032582                 | 1 |
| 76   | chr1  | - | 20803041,20799676                       | 20803195,20799803                       | 1 |
| 7701 | chr15 | + | 8196905,8212326                         | 8197255,8212385                         | 1 |
|      | chr15 | + | 8202148,8220678                         | 8202313,8221158                         | 1 |
| 7719 | chr15 | - | 10391620,10381960                       | 10391753,10382119                       | 1 |
| 7720 | chr15 | - | 10409335,10408647                       | 10409406,10408698                       | 1 |
|      | chr15 | - | 10413049,10409335                       | 10413161,10409406                       | 2 |
| 7732 | chr15 | - | 11317455,11314838                       | 11317533,11314953                       | 1 |
| 7733 | chr15 | - | 11836368,11834640                       | 11836472,11835429                       | 1 |
| 7737 | chr15 | + | 12075903,12113713                       | 12076151,12114218                       | 2 |
| 7743 | chr15 | + | 12797350,12819788                       | 12797425,12819927                       | 1 |
|      | chr15 | + | 12797350,12830857                       | 12797425,12830917                       | 1 |
|      | chr15 | + | 12820241,12855745                       | 12820302,12855828                       | 1 |
|      | chr15 | + | 12853810,12859419                       | 12853952,12859466                       | 1 |
|      | chr15 | + | 12855960,12859419                       | 12856064,12859466                       | 1 |
| 7746 | chr15 | - | 18095522,18011743                       | 18095741,18011873                       | 1 |
| 7758 | chr15 | + | 25654950,25741875                       | 25655035,25743426                       | 1 |
| 7760 | chr15 | + | 25916552,25921207                       | 25920219,25921320                       | 1 |
| 7766 | chr15 | - | 27697639,27688094                       | 27697788,27688164                       | 1 |
| 7768 | chr15 | + | 30835414,30851609                       | 30835588,30851760                       | 1 |
| 7772 | chr15 | - | 31422493,31414700                       | 31422526,31414835                       | 1 |
| 7774 | chr15 | - | 31523851,31522400                       | 31524001,31522538                       | 1 |
|      | chr15 | - | 31531355,31522039                       | 31531559,31522220                       | 2 |
| 7775 | chr15 | + | 31531870,31546625,31546625              | 31531904,31547290,31547290              | 3 |
| 7784 | chr15 | + | 34047634,34047634,34060918              | 34047865,34047865,34061043              | 1 |
|      | chr15 | + | 34053422,34060918,34047634,34060918     | 34053521,34061043,34047865,34061043     | 1 |
| 7786 | chr15 | + | 34308409,34339507                       | 34308532,34339630                       | 1 |
|      | chr15 | + | 34365486,34362787                       | 34365995,34362922                       | 1 |
| 7817 | chr15 | - | 37939380,37897082                       | 37939532,37898260                       | 1 |
|      | chr15 | - | 37970507,37928041,37971202              | 37970657,37928173,37971362              | 7 |
| 7826 | chr15 | - | 38943893,38929065                       | 38944184,38929211                       | 1 |
| 7827 | chr15 | + | 38959435,38975168                       | 38959513,38975304                       | 1 |
| 7828 | chr15 | + | 39366383,39367417,39506485              | 39366563,39367527,39506627              | 1 |
| 7835 | chr15 | + | 41620584,41654872                       | 41620778,41655041                       | 1 |
| 783  | chr1  | + | 130078562,130132118                     | 130081231,130132203                     | 1 |
|      | chr1  | + | 130083334,130090036                     | 130083486,130090333                     | 1 |
| 7843 | chr15 | + | 43326709,43339407,43358942              | 43326795,43339467,43359323              | 1 |

|      |       |   |                                     |                                     |   |
|------|-------|---|-------------------------------------|-------------------------------------|---|
| 7846 | chr15 | - | 44259207,44232827                   | 44259434,44233010                   | 1 |
| 7856 | chr15 | - | 47792753,47418484                   | 47793014,47418572                   | 1 |
|      | chr15 | - | 47813418,47528192                   | 47813557,47528370                   | 1 |
|      | chr15 | - | 48453539,47833012                   | 48453652,47833207                   | 1 |
| 785  | chr1  | + | 130140757,130152009                 | 130141129,130152038                 | 2 |
| 7870 | chr15 | - | 54738381,54677367                   | 54738507,54677500                   | 3 |
| 787  | chr1  | - | 130235926,130228167                 | 130236055,130228628                 | 1 |
|      | chr1  | - | 130245880,130228167                 | 130246046,130228628                 | 2 |
| 788  | chr1  | - | 130266069,130263274                 | 130266112,130263346                 | 1 |
|      | chr1  | - | 130310236,130264941                 | 130310329,130265022                 | 1 |
| 7892 | chr15 | + | 57979888,57989456,57989456          | 57979996,57990209,57990209          | 1 |
|      | chr15 | + | 57989456,57979888,57989456          | 57990209,57979988,57990209          | 2 |
| 7997 | chr15 | - | 59184055,59175579                   | 59184185,59175704                   | 1 |
| 7998 | chr15 | + | 59210422,59423251                   | 59210593,59423352                   | 1 |
| 8013 | chr15 | - | 63724672,63608995                   | 63724802,63609069                   | 1 |
| 8019 | chr15 | - | 63760651,63802484,63767133          | 63763234,63802523,63767204          | 1 |
| 8020 | chr15 | - | 64004246,63923609                   | 64004296,63923732                   | 1 |
| 8021 | chr15 | - | 64568951,64557014,64578458,64568951 | 64569124,64557093,64578660,64569124 | 3 |
| 8028 | chr15 | + | 66455553,66461361                   | 66455661,66461543                   | 1 |
|      | chr15 | + | 66460486,66454322                   | 66460651,66455661                   | 1 |
| 8037 | chr15 | + | 68843787,68921563                   | 68843904,68921622                   | 3 |
|      | chr15 | + | 68843787,68931370                   | 68843904,68931641                   | 1 |
|      | chr15 | + | 68847757,68879808                   | 68847904,68879891                   | 2 |
|      | chr15 | + | 68923330,68931370                   | 68924946,68931641                   | 9 |
| 8042 | chr15 | - | 72587645,72523933                   | 72587788,72524087                   | 3 |
|      | chr15 | - | 72891390,72886177                   | 72891634,72886240                   | 1 |
| 8053 | chr15 | - | 73622153,73603229                   | 73622273,73603389                   | 1 |
| 8055 | chr15 | + | 74373685,74414807                   | 74373792,74414847                   | 2 |
|      | chr15 | + | 74378049,74417186                   | 74378193,74417887                   | 1 |
|      | chr15 | + | 74380443,74419116                   | 74380487,74419894                   | 1 |
|      | chr15 | + | 74413321,74404531,74410994          | 74413417,74404598,74411166          | 1 |
| 805  | chr1  | - | 132954577,132950280                 | 132954657,132951812                 | 2 |
| 807  | chr1  | + | 133068497,133069880,133068497       | 133068811,133070054,133068811       | 1 |
| 8153 | chr15 | - | 75396012,75394801                   | 75396129,75394874                   | 1 |
|      | chr15 | - | 75396561,75385743                   | 75396689,75385918                   | 1 |
|      | chr15 | - | 75397021,75396012                   | 75397078,75396129                   | 3 |
| 8156 | chr15 | + | 75472558,75480281,75472558          | 75472941,75480350,75472941          | 3 |
| 8165 | chr15 | - | 75751487,75749102                   | 75751959,75749282                   | 2 |
| 8170 | chr15 | + | 75826368,75824198                   | 75826944,75824358                   | 2 |
| 8173 | chr15 | - | 75878871,75878050                   | 75879057,75878102                   | 2 |
|      | chr15 | - | 75889727,75878351                   | 75889808,75878426                   | 1 |
|      | chr15 | - | 75897423,75877615                   | 75897487,75877967                   | 1 |
|      | chr15 | - | 75897719,75879632                   | 75897809,75879731                   | 1 |
| 8174 | chr15 | - | 75900613,75906166,75900613          | 75901057,75906262,75901057          | 1 |
|      | chr15 | - | 75905036,75901895                   | 75905087,75902086                   | 2 |
|      | chr15 | - | 75906166,75900613                   | 75906262,75901057                   | 2 |
| 8177 | chr15 | - | 75955876,75954726                   | 75955995,75954844                   | 1 |
| 8178 | chr15 | - | 76016038,76008948                   | 76016196,76012329                   | 1 |
| 8180 | chr15 | + | 76078688,76079407                   | 76078798,76079551                   | 1 |
| 8183 | chr15 | - | 76128048,76127350                   | 76128198,76127448                   | 1 |
| 8186 | chr15 | + | 76173952,76175011                   | 76174122,76175138                   | 1 |
| 8187 | chr15 | - | 76178515,76177469                   | 76178657,76177615                   | 1 |
|      | chr15 | - | 76178730,76178325                   | 76178865,76178434                   | 1 |
|      | chr15 | - | 76180484,76178515                   | 76180659,76178657                   | 1 |
| 8188 | chr15 | + | 76182425,76183770                   | 76182471,76183890                   | 1 |
|      | chr15 | + | 76183075,76184015                   | 76183204,76184150                   | 1 |
| 8191 | chr15 | + | 76264256,76277598                   | 76264371,76277795                   | 1 |
|      | chr15 | + | 76273679,76282857                   | 76273834,76282923                   | 1 |
| 8192 | chr15 | - | 76284881,76284246                   | 76285014,76284535                   | 1 |
|      | chr15 | - | 76307558,76284073                   | 76307699,76284158                   | 2 |
| 8194 | chr15 | + | 76328048,76328197                   | 76328124,76328478                   | 1 |
|      | chr15 | + | 76328197,76328048                   | 76328478,76328124                   | 1 |
| 8195 | chr15 | - | 76333703,76333248                   | 76333745,76333610                   | 1 |
|      | chr15 | - | 76333819,76333248                   | 76333858,76333610                   | 2 |
|      | chr15 | - | 76333947,76333248                   | 76334051,76333610                   | 1 |
|      | chr15 | - | 76334135,76333819                   | 76334210,76333858                   | 1 |

|      |       |   |                                     |                                     |    |
|------|-------|---|-------------------------------------|-------------------------------------|----|
| 8197 | chr15 | - | 76368152,76367322                   | 76369164,76367850                   | 1  |
| 8199 | chr15 | + | 76423865,76425276                   | 76424061,76425368                   | 1  |
| 8200 | chr15 | - | 76428405,76428075,76427618          | 76428522,76428160,76427771          | 1  |
|      | chr15 | - | 76429697,76427346                   | 76429787,76427523                   | 2  |
|      | chr15 | - | 76432156,76426237                   | 76432279,76426362                   | 2  |
|      | chr15 | - | 76434153,76432750                   | 76434181,76432861                   | 1  |
| 8204 | chr15 | - | 76488570,76488570,76486789          | 76489295,76489295,76487350          | 3  |
| 8205 | chr15 | + | 76490338,76496658                   | 76490563,76496780                   | 1  |
|      | chr15 | + | 76491665,76497092                   | 76491814,76497222                   | 1  |
|      | chr15 | + | 76496458,76496876                   | 76496563,76497000                   | 1  |
| 8207 | chr15 | + | 76502109,76522284                   | 76502192,76522430                   | 1  |
|      | chr15 | + | 76502109,76523266                   | 76502192,76523370                   | 1  |
|      | chr15 | + | 76522126,76523266                   | 76522197,76523370                   | 1  |
|      | chr15 | + | 76524024,76524727                   | 76524154,76525345                   | 1  |
| 820  | chr1  | + | 133818519,133826192                 | 133818625,133826339                 | 2  |
| 8218 | chr15 | + | 76734968,76736285                   | 76735110,76736401                   | 1  |
| 8223 | chr15 | - | 76912768,76910908                   | 76914636,76912701                   | 12 |
|      | chr15 | - | 77136793,76929669                   | 77137358,76929762                   | 2  |
| 8239 | chr15 | - | 77758121,77753649                   | 77759398,77755096                   | 1  |
| 8246 | chr15 | - | 77997499,77989892                   | 77997559,77990138                   | 1  |
| 8254 | chr15 | + | 78259057,78264344                   | 78259297,78264440                   | 1  |
|      | chr15 | + | 78266014,78268916,78263414          | 78266140,78269733,78263506          | 1  |
|      | chr15 | + | 78266014,78268916,78264344          | 78266140,78269733,78264440          | 6  |
|      | chr15 | + | 78266014,78268916,78268916          | 78266140,78269733,78269733          | 1  |
|      | chr15 | + | 78267330,78268013                   | 78267424,78268101                   | 4  |
| 8303 | chr15 | + | 78720145,78722882                   | 78720298,78723070                   | 1  |
| 8309 | chr15 | + | 78778610,78802964                   | 78778768,78803076                   | 1  |
| 8312 | chr15 | + | 78864360,78866206                   | 78864491,78866361                   | 2  |
| 8315 | chr15 | + | 78908503,78919893                   | 78908583,78920391                   | 1  |
|      | chr15 | + | 78916863,78923766                   | 78917034,78923847                   | 2  |
|      | chr15 | + | 78919893,78924630                   | 78920391,78924830                   | 1  |
| 8327 | chr15 | - | 79252910,79251247                   | 79254485,79251440                   | 1  |
|      | chr15 | - | 79254581,79251013                   | 79254685,79251153                   | 3  |
|      | chr15 | - | 79256688,79251247                   | 79256917,79251440                   | 1  |
| 8337 | chr15 | + | 79537421,79542525                   | 79537602,79542649                   | 1  |
| 8338 | chr15 | - | 79570150,79559462                   | 79570311,79559506                   | 1  |
| 8353 | chr15 | + | 80202611,80208585                   | 80203085,80208778                   | 1  |
| 8357 | chr15 | + | 80718259,80753493                   | 80718305,80754112                   | 1  |
| 8358 | chr15 | + | 80786049,80790824,80791785,80793125 | 80786094,80790996,80791832,80793216 | 1  |
|      | chr15 | + | 80786049,80793125                   | 80786094,80793216                   | 1  |
| 8359 | chr15 | + | 80808234,80842085                   | 80808295,80842501                   | 1  |
|      | chr15 | + | 80838718,80842085                   | 80838864,80842501                   | 1  |
|      | chr15 | + | 80839113,80841290                   | 80839338,80841339                   | 1  |
|      | chr15 | + | 80840658,80842085                   | 80840708,80842501                   | 1  |
| 8369 | chr15 | + | 81416643,81456767                   | 81417152,81456905                   | 1  |
| 8373 | chr15 | - | 81542451,81535882                   | 81542565,81536004                   | 1  |
| 8379 | chr15 | - | 81740271,81745057                   | 81740345,81745567                   | 1  |
| 8382 | chr15 | - | 81791144,81782353                   | 81791294,81782469                   | 2  |
| 8394 | chr15 | + | 82119624,82121167                   | 82120665,82124872                   | 1  |
|      | chr15 | + | 82121167,82123675                   | 82121261,82124285                   | 1  |
| 8396 | chr15 | - | 82167816,82159969                   | 82167952,82160637                   | 1  |
| 8399 | chr15 | - | 82184510,82180592                   | 82184667,82180801                   | 2  |
| 8410 | chr15 | - | 82742415,82655660,82644910          | 82742564,82655754,82645033          | 2  |
| 8417 | chr15 | - | 83000863,82992279                   | 83000936,82992386                   | 1  |
| 8435 | chr15 | - | 83212191,83209428                   | 83212313,83209625                   | 1  |
| 8443 | chr15 | - | 83803672,83777264                   | 83803794,83777429                   | 1  |
| 8447 | chr15 | + | 84027434,84030722                   | 84027536,84030853                   | 2  |
|      | chr15 | + | 84029003,84030722                   | 84029091,84030853                   | 1  |
|      | chr15 | + | 84030722,84032659                   | 84030853,84032788                   | 1  |
|      | chr15 | + | 84037300,84044555                   | 84037371,84044733                   | 1  |
| 8460 | chr15 | + | 84875209,84886083                   | 84875265,84886116                   | 1  |
|      | chr15 | + | 84876049,84869201                   | 84876302,84869394                   | 1  |
| 8464 | chr15 | + | 85061228,85071049                   | 85061330,85071169                   | 1  |
|      | chr15 | + | 85061846,85074612                   | 85061984,85074736                   | 1  |
|      | chr15 | + | 85068892,85071049                   | 85069021,85071169                   | 1  |
| 8465 | chr15 | + | 85195706,85213333                   | 85195789,85213414                   | 3  |

|      |       |   |                                         |                                         |   |
|------|-------|---|-----------------------------------------|-----------------------------------------|---|
|      | chr15 | + | 85217420,85268531                       | 85217586,85268595                       | 3 |
|      | chr15 | + | 85268531,85293350                       | 85268595,85294266                       | 1 |
| 846  | chr1  | + | 135262152,135275893                     | 135262412,135276892                     | 2 |
| 8470 | chr15 | - | 85642068,85639641                       | 85642089,85639754                       | 1 |
| 8483 | chr15 | + | 87374728,87550931                       | 87375033,87551059                       | 1 |
| 8500 | chr15 | - | 88958819,88958351                       | 88959057,88958448                       | 1 |
| 8503 | chr15 | - | 89001496,88993707                       | 89001546,88993800                       | 1 |
| 8504 | chr15 | - | 89017577,89012642,89018583,89017761     | 89017673,89015539,89018639,89017885     | 1 |
|      | chr15 | - | 89019867,89015967                       | 89019948,89016077                       | 1 |
| 8505 | chr15 | + | 89041989,89116209                       | 89042210,89116437                       | 2 |
|      | chr15 | + | 89087139,89104400                       | 89087280,89104616                       | 1 |
|      | chr15 | + | 89104400,89113313                       | 89104616,89113509                       | 2 |
| 8506 | chr15 | - | 89125825,89119242                       | 89126007,89119374                       | 1 |
|      | chr15 | - | 89125825,89120353                       | 89126007,89120461                       | 1 |
|      | chr15 | - | 89131203,89118666                       | 89131382,89119156                       | 1 |
|      | chr15 | - | 89136610,89125825                       | 89136724,89126007                       | 1 |
|      | chr15 | - | 89138452,89123866                       | 89138590,89124097                       | 1 |
| 8515 | chr15 | - | 89258222,89257754                       | 89258304,89257858                       | 1 |
|      | chr15 | - | 89259807,89258222                       | 89260330,89258304                       | 2 |
| 8520 | chr15 | + | 89331834,89374224                       | 89331906,89374309                       | 1 |
| 8522 | chr15 | - | 89414029,89414340                       | 89414113,89414821                       | 1 |
| 8527 | chr15 | - | 90371687,90346338                       | 90371741,90346520                       | 1 |
| 8543 | chr15 | - | 93226017,93221481                       | 93226046,93221589                       | 1 |
| 8552 | chr15 | - | 95177192,95071967                       | 95177318,95072108                       | 1 |
|      | chr15 | - | 95205158,95062914                       | 95205287,95063108                       | 2 |
|      | chr15 | - | 95214056,95129288                       | 95214159,95129411                       | 1 |
|      | chr15 | - | 95215495,95049880                       | 95215587,95050585                       | 2 |
|      | chr15 | - | 95261969,95059514                       | 95262098,95059739                       | 2 |
| 8561 | chr15 | + | 96209244,96222785                       | 96209393,96222909                       | 1 |
| 8567 | chr15 | + | 97191630,97214458,97107764              | 97191766,97216107,97107847              | 1 |
| 8568 | chr15 | - | 97514463,97505535                       | 97514534,97505810                       | 1 |
| 8572 | chr15 | - | 97674536,97627263                       | 97674733,97627382                       | 1 |
| 8574 | chr15 | + | 97794659,97796677                       | 97794766,97796741                       | 1 |
| 8575 | chr15 | - | 97815712,97810576                       | 97815766,97810684                       | 1 |
|      | chr15 | - | 97819716,97818514                       | 97819815,97818622                       | 1 |
| 8577 | chr15 | + | 97952649,97962345                       | 97952694,97962882                       | 1 |
| 8599 | chr15 | - | 98502647,98499635                       | 98503076,98501273                       | 2 |
|      | chr15 | - | 98504276,98499635                       | 98504386,98501273                       | 1 |
|      | chr15 | - | 98504276,98504276,98499635              | 98504386,98504386,98501273              | 1 |
| 8616 | chr15 | - | 98736346,98734351                       | 98736413,98734939                       | 2 |
| 8622 | chr15 | + | 98905780,98911296                       | 98905929,98911380                       | 1 |
| 8630 | chr15 | + | 99125669,99136826                       | 99125704,99137030                       | 1 |
|      | chr15 | + | 99136592,99140374                       | 99136617,99140466                       | 1 |
|      | chr15 | + | 99138252,99146891                       | 99138361,99147438                       | 1 |
|      | chr15 | + | 99145273,99146153                       | 99145411,99146331                       | 2 |
|      | chr15 | + | 99145621,99140374,99145273              | 99145717,99140466,99145411              | 1 |
| 8632 | chr15 | + | 99232491,99237007                       | 99232600,99237108                       | 1 |
| 8635 | chr15 | - | 99344347,99327435                       | 99344387,99330728                       | 1 |
| 8641 | chr15 | + | 99532717,99538070                       | 99532929,99538232                       | 1 |
|      | chr15 | + | 99534168,99541523                       | 99534291,99541646                       | 1 |
| 8644 | chr15 | - | 99571374,99567977                       | 99571467,99568084                       | 2 |
|      | chr15 | - | 99576319,99570032,99569836              | 99576377,99570161,99569943              | 1 |
| 8650 | chr15 | + | 100063163,100082499                     | 100063262,100082630                     | 1 |
| 8669 | chr15 | + | 100633665,100637631                     | 100633779,100637883                     | 1 |
| 8673 | chr15 | + | 100958967,100967794                     | 100959014,100968070                     | 1 |
| 8700 | chr15 | - | 101615240,101610558                     | 101615455,101610684                     | 1 |
| 8716 | chr15 | - | 102009211,102007428,102007428           | 102009263,102008217,102008217           | 1 |
| 8729 | chr15 | + | 102304561,102305005                     | 102304585,102305195                     | 1 |
|      | chr15 | + | 102309046,102316378                     | 102309178,102316471                     | 1 |
|      | chr15 | + | 102313590,102314584,102309046           | 102313719,102314671,102309178           | 3 |
|      | chr15 | + | 102313590,102314584,102316378,102317518 | 102313719,102314671,102316471,102317560 | 1 |
|      | chr15 | + | 102313590,102314584,102317518           | 102313719,102314671,102317560           | 2 |
|      | chr15 | + | 102313590,102314584,102318635,102319206 | 102313719,102314671,102318708,102319311 | 2 |
|      | chr15 | + | 102314584,102309046                     | 102314671,102309178                     | 1 |
|      | chr15 | + | 102316378,102313590,102314584           | 102316471,102313719,102314671           | 1 |
|      | chr15 | + | 102318635,102319206,102313590,102314584 | 102318708,102319311,102313719,102314671 | 3 |

|      |       |   |                                     |                                     |   |
|------|-------|---|-------------------------------------|-------------------------------------|---|
|      | chr15 | + | 102319206,102321064                 | 102319311,102321234                 | 2 |
|      | chr15 | + | 102321064,102319206                 | 102321234,102319311                 | 6 |
| 872  | chr1  | - | 136673891,136668574                 | 136674036,136668625                 | 1 |
| 8730 | chr15 | - | 102332745,102331282                 | 102332855,102331353                 | 2 |
| 8731 | chr15 | + | 102348889,102352154                 | 102349033,102352227                 | 1 |
| 8736 | chr15 | - | 102538017,102537209                 | 102539083,102537977                 | 9 |
| 8751 | chr15 | + | 103074055,103076975                 | 103074211,103077123                 | 1 |
| 8757 | chr15 | - | 103189480,103186746                 | 103189611,103186872                 | 1 |
| 8761 | chr15 | + | 103355228,103357975                 | 103355329,103358106                 | 2 |
| 8762 | chr15 | - | 103362756,103368225,103363887       | 103362912,103368423,103363925       | 2 |
|      | chr15 | - | 103364780,103363468                 | 103364841,103363532                 | 2 |
| 8766 | chr16 | + | 3745295,3747912                     | 3745512,3748265                     | 1 |
| 8771 | chr16 | + | 3895513,3899871                     | 3895967,3899968                     | 1 |
|      | chr16 | + | 3899871,3903465,3894368,3897250     | 3899968,3904781,3894484,3897380     | 1 |
| 8773 | chr16 | + | 3913284,3919480                     | 3913369,3919564                     | 1 |
|      | chr16 | + | 3928489,3933706                     | 3928631,3933814                     | 1 |
| 8777 | chr16 | - | 4045442,4040358                     | 4045581,4040431                     | 1 |
|      | chr16 | - | 4055796,4043952                     | 4055870,4044098                     | 1 |
| 8778 | chr16 | - | 4094173,4091791                     | 4094320,4091959                     | 1 |
|      | chr16 | - | 4115777,4088243                     | 4115957,4088405                     | 1 |
| 8786 | chr16 | - | 4679551,4630187                     | 4679720,4630277                     | 1 |
| 878  | chr1  | + | 137043410,137050984                 | 137043677,137051052                 | 1 |
| 8795 | chr16 | + | 4918865,4927674                     | 4918913,4927901                     | 1 |
| 8801 | chr16 | - | 4941442,4942697,4941442             | 4941802,4942783,4941802             | 2 |
|      | chr16 | - | 4942697,4941442,4943083             | 4942783,4941802,4943256             | 2 |
| 8810 | chr16 | - | 5216834,5212684,5211920             | 5216952,5212765,5212305             | 1 |
|      | chr16 | - | 5222155,5211920                     | 5222373,5212305                     | 1 |
| 8813 | chr16 | + | 5885090,7294162                     | 5885957,7294223                     | 1 |
|      | chr16 | + | 7294162,7375997                     | 7294223,7376062                     | 1 |
|      | chr16 | + | 7306500,7353024,7285570,7292277     | 7306554,7353157,7285624,7292370     | 2 |
|      | chr16 | + | 7306500,7353024                     | 7306554,7353157                     | 1 |
|      | chr16 | + | 7306500,7353024,7375997             | 7306554,7353157,7376062             | 1 |
|      | chr16 | + | 7330454,7353024,7369893,7392080     | 7330535,7353157,7369936,7392133     | 1 |
|      | chr16 | + | 7375997,7408056,7306500,7353024     | 7376062,7408132,7306554,7353157     | 1 |
|      | chr16 | + | 7409783,7353024,7375997             | 7411611,7353157,7376062             | 1 |
| 8817 | chr16 | + | 8484354,8478059,8482348             | 8484426,8478422,8482493             | 1 |
| 881  | chr1  | - | 137161759,137159288                 | 137161984,137159706                 | 1 |
| 8829 | chr16 | - | 10313904,10281841                   | 10314061,10284708                   | 1 |
| 8832 | chr16 | + | 10421319,10423333                   | 10421430,10423624                   | 1 |
| 884  | chr1  | - | 137267823,137268773                 | 137268252,137268941                 | 1 |
| 8850 | chr16 | - | 11084843,11075003                   | 11084986,11075735                   | 1 |
| 8855 | chr16 | - | 11237623,11224512                   | 11237657,11224686                   | 1 |
| 885  | chr1  | - | 137316567,137288072                 | 137316654,137288221                 | 1 |
| 8872 | chr16 | + | 13819369,13827152,13829097          | 13819529,13827218,13829171          | 2 |
|      | chr16 | + | 13827480,13829097,13832429,13835227 | 13827589,13829171,13832527,13835543 | 1 |
|      | chr16 | + | 13829097,13831699,13819369          | 13829171,13831753,13819529          | 1 |
|      | chr16 | + | 13829097,13831699,13827152,13827480 | 13829171,13831753,13827218,13827589 | 1 |
|      | chr16 | + | 13829097,13832429,13835227          | 13829171,13832527,13835543          | 3 |
|      | chr16 | + | 13832429,13835227,13829097,13831210 | 13832527,13835543,13829171,13831264 | 5 |
|      | chr16 | + | 13832429,13835227                   | 13832527,13835543                   | 3 |
| 8873 | chr16 | - | 13835792,13834022                   | 13836708,13834939                   | 4 |
|      | chr16 | - | 13843863,13837135                   | 13843969,13837240                   | 1 |
| 8879 | chr16 | - | 14234445,14219952                   | 14234564,14220159                   | 1 |
| 887  | chr1  | - | 137368735,137351010                 | 137369033,137351179                 | 1 |
|      | chr1  | - | 137433773,137367056                 | 137433876,137367747                 | 1 |
| 8880 | chr16 | - | 14317386,14313908,14313908,14299336 | 14317425,14314106,14314106,14300302 | 1 |
| 8887 | chr16 | + | 15650743,15705263                   | 15650818,15705397                   | 1 |
|      | chr16 | + | 15663075,15734073                   | 15663222,15734222                   | 1 |
| 88   | chr1  | - | 22540237,22387531                   | 22540316,22387644                   | 1 |
| 8914 | chr16 | - | 17297643,17303083,17299534          | 17297763,17303235,17299662          | 1 |
|      | chr16 | - | 17315641,17280444                   | 17315731,17280713                   | 4 |
|      | chr16 | - | 17378534,17280444                   | 17378607,17280713                   | 1 |
|      | chr16 | - | 17405726,17291207                   | 17405955,17291328                   | 1 |
| 8918 | chr16 | + | 17505010,17507219,17507219          | 17505109,17507575,17507575          | 1 |
|      | chr16 | + | 17507219,17503736,17507219          | 17507575,17503854,17507575          | 1 |
| 8919 | chr16 | + | 17522473,17525769                   | 17522569,17526423                   | 1 |



|      |       |   |                                     |                                     |   |
|------|-------|---|-------------------------------------|-------------------------------------|---|
|      | chr16 | + | 17524188,17525515,17523369          | 17524315,17525596,17523526          | 1 |
| 8922 | chr16 | + | 17568125,17570450,17567965          | 17568267,17570544,17568046          | 2 |
| 892  | chr1  | + | 137677739,137679811                 | 137678180,137680007                 | 1 |
| 8935 | chr16 | - | 17926748,17927637,17927246          | 17926833,17927745,17927385          | 1 |
| 8942 | chr16 | - | 18245293,18240986                   | 18245451,18241052                   | 1 |
| 8946 | chr16 | + | 18397051,18400177                   | 18397210,18400346                   | 2 |
|      | chr16 | + | 18400177,18402700                   | 18400346,18402828                   | 1 |
| 8947 | chr16 | - | 18411782,18410775,18407635          | 18412050,18410907,18408133          | 2 |
|      | chr16 | - | 18411782,18411782,18410775          | 18412050,18412050,18410907          | 1 |
| 8949 | chr16 | + | 18443296,18477743                   | 18443367,18477950                   | 1 |
| 8953 | chr16 | - | 18623197,18621903                   | 18623333,18622889                   | 1 |
|      | chr16 | - | 18624675,18624203,18623197          | 18624810,18624305,18623333          | 1 |
|      | chr16 | - | 18625261,18623413                   | 18625348,18623510                   | 3 |
|      | chr16 | - | 18629743,18623007                   | 18629754,18623110                   | 1 |
|      | chr16 | - | 18629900,18623197                   | 18630031,18623333                   | 1 |
|      | chr16 | - | 18629900,18625437,18624901          | 18630031,18625534,18625025          | 1 |
| 8976 | chr16 | - | 20287929,20282996,20279893          | 20288025,20283098,20280158          | 6 |
|      | chr16 | - | 20287929,20286992,20287929,20282996 | 20288025,20287142,20288025,20283098 | 2 |
| 8978 | chr16 | - | 20344707,20333658                   | 20344867,20333823                   | 1 |
|      | chr16 | - | 20378519,20335178                   | 20378592,20335292                   | 1 |
| 8979 | chr16 | + | 20501976,20505271                   | 20502057,20505413                   | 2 |
|      | chr16 | + | 20502602,20505271                   | 20502915,20505413                   | 1 |
| 8980 | chr16 | + | 20532356,20531152                   | 20532593,20532260                   | 6 |
| 8982 | chr16 | + | 20549816,20560255                   | 20549863,20560343                   | 1 |
|      | chr16 | + | 20559987,20560255,20552171,20559713 | 20560120,20560343,20552227,20559805 | 1 |
| 8985 | chr16 | - | 20608814,20607836,20606832          | 20608962,20607957,20607038          | 2 |
| 8989 | chr16 | + | 20672821,20677758                   | 20672949,20677871                   | 1 |
|      | chr16 | + | 20674858,20687453                   | 20674879,20687535                   | 1 |
|      | chr16 | + | 20681806,20688611                   | 20681995,20688710                   | 1 |
| 8996 | chr16 | + | 21218087,21221357                   | 21218438,21221573                   | 1 |
| 8998 | chr16 | + | 21506842,21575039                   | 21506894,21575120                   | 1 |
| 9010 | chr16 | - | 22599906,22519617                   | 22599960,22519708                   | 1 |
| 9013 | chr16 | - | 22857417,22822154,22822154          | 22857642,22822652,22822652          | 6 |
| 9014 | chr16 | + | 22869193,22871743                   | 22869276,22872442                   | 1 |
| 901  | chr1  | + | 138056589,138067718                 | 138056784,138067883                 | 1 |
| 9055 | chr16 | - | 29422672,29413814                   | 29422836,29413887                   | 1 |
| 9056 | chr16 | + | 29588337,29610753                   | 29588445,29610834                   | 1 |
|      | chr16 | + | 29588908,29651839                   | 29588962,29652576                   | 1 |
| 9067 | chr16 | - | 30581044,30571250                   | 30581131,30571622                   | 1 |
| 9074 | chr16 | + | 31438077,31449909                   | 31438203,31450051                   | 1 |
| 9084 | chr16 | - | 32097085,32087379                   | 32097149,32087593                   | 1 |
| 9121 | chr16 | - | 34034541,34031639                   | 34034628,34031717                   | 1 |
| 9130 | chr16 | - | 35429818,35407719                   | 35429890,35407850                   | 1 |
| 9133 | chr16 | + | 35770471,35817237                   | 35770625,35817409                   | 1 |
| 9155 | chr16 | - | 36784740,36775683                   | 36785048,36775776                   | 1 |
| 9158 | chr16 | + | 36887324,36875225                   | 36887489,36880320                   | 3 |
| 9161 | chr16 | + | 36962076,36962701                   | 36962320,36963300                   | 1 |
| 9192 | chr16 | - | 42248673,42340585,42248673          | 42249227,42340764,42249227          | 2 |
|      | chr16 | - | 42340585,42248673                   | 42340764,42249227                   | 2 |
| 9205 | chr16 | - | 44114726,44139060,44115613          | 44114855,44139132,44116995          | 4 |
| 920  | chr1  | - | 140753157,140753157,140752650       | 140753431,140753431,140753096       | 1 |
| 9222 | chr16 | + | 45162518,45182933                   | 45162560,45183089                   | 3 |
| 9245 | chr16 | - | 48984647,48942188                   | 48984748,48942316                   | 1 |
| 9248 | chr16 | + | 49699406,49703262,49699406          | 49699662,49703381,49699662          | 2 |
| 9249 | chr16 | + | 49894289,49896468                   | 49894397,49896561                   | 2 |
|      | chr16 | + | 49898152,49910981,49896468          | 49898245,49911796,49896561          | 2 |
|      | chr16 | + | 49910981,49898152,49910981          | 49911796,49898245,49911796          | 3 |
| 9260 | chr16 | - | 52253237,52251025,52270759,52268494 | 52253349,52251759,52270892,52268612 | 1 |
| 9274 | chr16 | + | 56613279,56614802                   | 56613366,56614865                   | 1 |
| 9283 | chr16 | - | 57311365,57306938                   | 57311468,57307026                   | 1 |
| 9334 | chr16 | - | 63863785,63568213                   | 63863983,63568363                   | 1 |
| 9344 | chr16 | - | 66784961,66747443                   | 66785132,66747622                   | 1 |
| 934  | chr1  | + | 142251030,142466958                 | 142251130,142467060                 | 1 |
| 9357 | chr16 | - | 73904627,73897260,73892550          | 73904801,73897452,73896075          | 1 |
| 9368 | chr16 | + | 77556166,77500750                   | 77558673,77500890                   | 6 |
| 9383 | chr16 | - | 85056568,85025667                   | 85056771,85025742                   | 3 |

|      |       |   |                                     |                                     |    |
|------|-------|---|-------------------------------------|-------------------------------------|----|
|      | chr16 | - | 85080084,85040495,85083020,85080084 | 85080278,85040552,85083133,85080278 | 1  |
|      | chr16 | - | 85083020,84962966                   | 85083133,84963113                   | 3  |
|      | chr16 | - | 85120774,84954687                   | 85120942,84955677                   | 1  |
|      | chr16 | - | 85173746,84954687                   | 85173948,84955677                   | 1  |
| 9393 | chr16 | - | 87411863,87381706                   | 87412103,87381927                   | 1  |
|      | chr16 | - | 87418679,87413391                   | 87418815,87413533                   | 2  |
| 9395 | chr16 | + | 87462209,87481958                   | 87462385,87482045                   | 1  |
|      | chr16 | + | 87481119,87483351                   | 87481214,87483758                   | 1  |
| 9396 | chr16 | - | 87486839,87485824                   | 87486906,87485989                   | 1  |
|      | chr16 | - | 87486839,87486480,87485048          | 87486906,87486596,87485168          | 1  |
|      | chr16 | - | 87486839,87486480                   | 87486906,87486596                   | 1  |
|      | chr16 | - | 87487778,87483569                   | 87487957,87484310                   | 1  |
|      | chr16 | - | 87487778,87485824                   | 87487957,87485989                   | 1  |
|      | chr16 | - | 87489051,87486078                   | 87489189,87486150                   | 1  |
|      | chr16 | - | 87490729,87489051                   | 87490910,87489189                   | 1  |
| 9435 | chr16 | - | 90960736,90960488                   | 90960922,90960704                   | 3  |
| 9445 | chr16 | + | 91547338,91558129,91558129          | 91547477,91558323,91558323          | 1  |
| 9449 | chr16 | + | 91651874,91664442                   | 91652041,91664589                   | 6  |
|      | chr16 | + | 91671593,91677649                   | 91671710,91677721                   | 1  |
| 9469 | chr16 | - | 93588063,93583705                   | 93588145,93583929                   | 1  |
| 9472 | chr16 | + | 93806579,93808062                   | 93806716,93808224                   | 1  |
| 9477 | chr16 | + | 94104911,94342752                   | 94105020,94342900                   | 1  |
| 9480 | chr16 | - | 94591972,94591695                   | 94592055,94591896                   | 1  |
| 9481 | chr16 | + | 94608943,94647757                   | 94608997,94647850                   | 2  |
|      | chr16 | + | 94608943,94664077                   | 94608997,94665098                   | 1  |
|      | chr16 | + | 94615941,94654722                   | 94618233,94654769                   | 3  |
|      | chr16 | + | 94624920,94637555                   | 94624975,94637616                   | 2  |
|      | chr16 | + | 94631290,94655922                   | 94631336,94655979                   | 3  |
|      | chr16 | + | 94632439,94657082                   | 94632563,94657153                   | 1  |
|      | chr16 | + | 94637888,94647757                   | 94637973,94647850                   | 1  |
|      | chr16 | + | 94640213,94672626                   | 94640348,94672766                   | 3  |
|      | chr16 | + | 94640213,94679537                   | 94640348,94679639                   | 1  |
|      | chr16 | + | 94641004,94660791                   | 94641085,94660956                   | 5  |
|      | chr16 | + | 94645671,94647757                   | 94645794,94647850                   | 3  |
|      | chr16 | + | 94649397,94679537                   | 94649534,94679639                   | 2  |
|      | chr16 | + | 94653394,94688509                   | 94653646,94688602                   | 3  |
|      | chr16 | + | 94660794,94678317                   | 94660956,94678418                   | 3  |
|      | chr16 | + | 94669605,94672626,94660794,94666091 | 94669755,94672766,94660890,94666157 | 3  |
|      | chr16 | + | 94676033,94678927                   | 94676130,94679018                   | 1  |
|      | chr16 | + | 94678927,94684102                   | 94679018,94684237                   | 2  |
| 9493 | chr16 | - | 96282605,96241025                   | 96282706,96241067                   | 1  |
| 9515 | chr17 | - | 3079275,3079354                     | 3079320,3079591                     | 1  |
| 9517 | chr17 | + | 3257737,3196759                     | 3258895,3198859                     | 1  |
| 9519 | chr17 | + | 3428790,3514670                     | 3429015,3514776                     | 1  |
| 951  | chr1  | - | 152231558,152219158                 | 152231665,152219329                 | 1  |
| 952  | chr1  | + | 152250727,152259030                 | 152250831,152259138                 | 1  |
|      | chr1  | + | 152253591,152257109                 | 152253684,152257307                 | 3  |
|      | chr1  | + | 152253591,152277690                 | 152253684,152277834                 | 1  |
|      | chr1  | + | 152253591,152279948                 | 152253684,152280010                 | 1  |
|      | chr1  | + | 152269657,152272766                 | 152269810,152272904                 | 1  |
|      | chr1  | + | 152269657,152287196                 | 152269810,152287328                 | 1  |
|      | chr1  | + | 152275249,152290464                 | 152275380,152290559                 | 1  |
|      | chr1  | + | 152279948,152282772                 | 152280010,152283045                 | 1  |
|      | chr1  | + | 152286211,152292997                 | 152286406,152293093                 | 1  |
| 9530 | chr17 | + | 5902363,5930569                     | 5902514,5930711                     | 1  |
| 954  | chr1  | - | 152496016,152446001                 | 152496114,152446172                 | 1  |
|      | chr1  | - | 152706268,152430296                 | 152706391,152430410                 | 1  |
| 9566 | chr17 | + | 7463459,7493263                     | 7463729,7493353                     | 1  |
| 9569 | chr17 | - | 7943208,7933532                     | 7943317,7933655                     | 1  |
| 956  | chr1  | + | 153196505,153210241                 | 153196733,153211575                 | 3  |
|      | chr1  | + | 153207847,153208061,153208591       | 153207969,153208188,153208765       | 2  |
| 9590 | chr17 | - | 10512186,10410580                   | 10512242,10410668                   | 2  |
| 9605 | chr17 | + | 13052406,13022690                   | 13052988,13023201                   | 1  |
| 9612 | chr17 | + | 13109278,13110663                   | 13110334,13110749                   | 2  |
|      | chr17 | + | 13109330,13116395                   | 13109495,13116559                   | 2  |
|      | chr17 | + | 13110663,13109278                   | 13110749,13110334                   | 10 |

|      |       |   |                                     |                                     |    |
|------|-------|---|-------------------------------------|-------------------------------------|----|
| 9614 | chr17 | - | 13141379,13135907                   | 13141523,13136898                   | 1  |
| 9627 | chr17 | + | 13898611,13944286                   | 13899010,13944399                   | 1  |
|      | chr17 | + | 13962949,13983440                   | 13962994,13983646                   | 1  |
|      | chr17 | + | 13972244,13987786                   | 13972363,13988052                   | 1  |
| 9637 | chr17 | - | 15096423,15092988,15092037,15091796 | 15096530,15093072,15092171,15091946 | 1  |
| 9642 | chr17 | + | 15211380,15196729                   | 15211957,15196948                   | 2  |
| 9701 | chr17 | + | 21095903,21098548                   | 21095974,21098703                   | 3  |
|      | chr17 | + | 21099537,21102418,21099537          | 21099680,21102869,21099680          | 1  |
| 9747 | chr17 | - | 23806357,23805585                   | 23806420,23805853                   | 1  |
| 9754 | chr17 | - | 23876826,23873152                   | 23877297,23874966                   | 1  |
| 9758 | chr17 | - | 23897573,23893513                   | 23898083,23893777                   | 1  |
| 9761 | chr17 | + | 23946935,23948605                   | 23947013,23948698                   | 1  |
|      | chr17 | + | 23947997,23949394                   | 23948048,23949587                   | 1  |
|      | chr17 | + | 23958887,23961182                   | 23959495,23961710                   | 1  |
| 9785 | chr17 | + | 24520844,24542189                   | 24520988,24542384                   | 2  |
| 9797 | chr17 | - | 24647400,24646680                   | 24647517,24646812                   | 1  |
|      | chr17 | - | 24648516,24646900                   | 24648644,24647020                   | 1  |
| 9799 | chr17 | - | 24669156,24667335,24666685          | 24669267,24667388,24666762          | 1  |
| 9801 | chr17 | - | 24752421,24737279                   | 24752544,24737410                   | 1  |
|      | chr17 | - | 24765886,24758571                   | 24766031,24758709                   | 1  |
| 9809 | chr17 | - | 24842341,24841080                   | 24842426,24841222                   | 1  |
| 9827 | chr17 | - | 25036340,25031799                   | 25036520,25032091                   | 2  |
|      | chr17 | - | 25037442,25037106,25039222,25037732 | 25037591,25037278,25039388,25037800 | 1  |
|      | chr17 | - | 25064064,25037732                   | 25064894,25037800                   | 1  |
| 9830 | chr17 | + | 25229712,25230007,25235673          | 25229925,25230174,25236431          | 1  |
| 9832 | chr17 | - | 25239581,25238243                   | 25239673,25238359                   | 1  |
| 9848 | chr17 | - | 25524689,25518366                   | 25524845,25518518                   | 1  |
|      | chr17 | - | 25524689,25523914                   | 25524845,25524123                   | 1  |
| 9856 | chr17 | - | 25863645,25860947                   | 25863793,25861045                   | 1  |
| 9861 | chr17 | - | 25921948,25922372                   | 25922278,25922512                   | 1  |
| 9863 | chr17 | - | 25928516,25927450                   | 25928621,25927723                   | 1  |
|      | chr17 | - | 25928516,25927877                   | 25928621,25927928                   | 1  |
|      | chr17 | - | 25928997,25928290,25928997,25928516 | 25929229,25928431,25929229,25928621 | 1  |
|      | chr17 | - | 25928997,25928290                   | 25929229,25928431                   | 1  |
|      | chr17 | - | 25928997,25929275                   | 25929229,25929329                   | 10 |
| 9864 | chr17 | - | 25933185,25931811                   | 25933586,25932378                   | 2  |
| 9869 | chr17 | - | 25973355,25972081                   | 25973517,25972142                   | 1  |
| 9871 | chr17 | - | 25986507,25982523                   | 25986629,25982643                   | 1  |
|      | chr17 | - | 25996802,25982319                   | 25996870,25982404                   | 1  |
| 9884 | chr17 | - | 26152888,26148941                   | 26153100,26149076                   | 1  |
| 9886 | chr17 | - | 26230360,26228689                   | 26231215,26229097                   | 5  |
| 9887 | chr17 | + | 26256343,26257228,26258484          | 26256480,26257407,26258601          | 5  |
|      | chr17 | + | 26257228,26258484,26258882          | 26257407,26258601,26260198          | 2  |
| 9891 | chr17 | - | 26336959,26336557                   | 26337043,26336621                   | 2  |
| 9892 | chr17 | + | 26339906,26345108                   | 26339986,26345247                   | 1  |
|      | chr17 | + | 26341431,26341795,26342651,26344340 | 26341490,26341872,26342720,26344402 | 2  |
|      | chr17 | + | 26344398,26342052                   | 26344604,26342134                   | 3  |
| 9894 | chr17 | + | 26414490,26416905                   | 26414579,26417668                   | 1  |
| 98   | chr1  | - | 24332817,24319286                   | 24332871,24319391                   | 1  |
| 9901 | chr17 | + | 26920389,26928885                   | 26920482,26929466                   | 1  |
| 9904 | chr17 | + | 27073068,27073456                   | 27073136,27073625                   | 1  |
| 9905 | chr17 | - | 27076395,27075362                   | 27076423,27075412                   | 2  |
| 9912 | chr17 | + | 27194480,27255489                   | 27194619,27255617                   | 1  |
| 9    | chr1  | + | 5083443,5085695,5088109,5107470     | 5083533,5085809,5088214,5107568     | 2  |
|      | chr1  | + | 5085695,5088109,5107470             | 5085809,5088214,5107568             | 2  |
|      | chr1  | + | 5088109,5107470                     | 5088214,5107568                     | 2  |
|      | chr1  | + | 5088109,5107470,5114357             | 5088214,5107568,5114550             | 1  |
|      | chr1  | + | 5107470,5152185                     | 5107568,5152630                     | 1  |
|      | chr1  | + | 5114357,5088109,5107470             | 5114550,5088214,5107568             | 5  |

Each row in the table documents a possible novel transcript. Exon starts and ends point to exons in this transcript. The last column shows how many Solexa reads supports this novel transcript.
