# Supplementary material
Source: PubMed Central journal article supplement (PMC2722358)
Supplement: 0902417106_ST4_PDF.pdf [file 0902417106_ST4_PDF.pdf]

**Supplemental Table 4. Upregulation and downregulation of genes from E18 to P7.**

| Gene/<br>Cluster                                                                  | UCSC Known Genes<br>Descriptions                        | Single-End |      |      | Paired-End 1 |      |      | Paired-End 2 |      |       |
|-----------------------------------------------------------------------------------|---------------------------------------------------------|------------|------|------|--------------|------|------|--------------|------|-------|
|                                                                                   |                                                         | E18        | P7   | Fold | E18          | P7   | Fold | E18          | P7   | Fold  |
| <b>Upregulation of synaptic proteins, receptors, and cell signaling molecules</b> |                                                         |            |      |      |              |      |      |              |      |       |
| <b>Synaptic Proteins</b>                                                          |                                                         |            |      |      |              |      |      |              |      |       |
| 5976                                                                              | Cplx2::complexin 2                                      | 395        | 1489 | 3.8  | 505          | 2277 | 4.5  | 746          | 2914 | 3.91  |
| 4212                                                                              | Nsf::N-ethylmaleimide sensitive fusion protein          | 136        | 673  | 4.9  | 230          | 920  | 4.0  | 304          | 1754 | 5.77  |
| 19982                                                                             | Snca::synuclein, alpha                                  | 163        | 1055 | 6.5  | 225          | 995  | 4.4  | 357          | 1874 | 5.25  |
| 5989                                                                              | Sncb::synuclein, beta                                   | 92         | 398  | 4.3  | 135          | 541  | 4.0  | 208          | 1195 | 5.75  |
| 14518                                                                             | Snph::syntaphilin                                       | 47         | 272  | 5.8  | 111          | 548  | 4.9  | 164          | 784  | 4.78  |
| 19122                                                                             | Stx1a::syntaxin 1A (brain)                              | 174        | 717  | 4.1  | 361          | 1542 | 4.3  | 565          | 1942 | 3.44  |
| 8347                                                                              | Syngri1::synaptogyrin 1                                 | 121        | 591  | 4.9  | 178          | 974  | 5.5  | 290          | 1464 | 5.05  |
| 26386                                                                             | Syp::synaptophysin                                      | 329        | 1706 | 5.2  | 587          | 3087 | 5.3  | 990          | 5355 | 5.41  |
| 2453                                                                              | Syt1::synaptotagmin 1                                   | 123        | 646  | 5.3  | 94           | 679  | 7.2  | 278          | 1458 | 5.24  |
| <b>Receptors and Channels</b>                                                     |                                                         |            |      |      |              |      |      |              |      |       |
| 860                                                                               | Adora1::adenosine A1 receptor                           | 100        | 483  | 4.8  | 178          | 862  | 4.8  | 197          | 782  | 3.97  |
| 24083                                                                             | Cacna1a::Ca2+ channel, voltage-dependent, P/Q           | 90         | 215  | 2.4  | 69           | 349  | 5.1  | 109          | 327  | 3.00  |
| 11942                                                                             | Chrm1::cholinergic receptor, muscarinic 1, CNS          | 38         | 215  | 5.7  | 57           | 517  | 9.1  | 92           | 567  | 6.16  |
| 12723                                                                             | Grin1::glutamate receptor, ionotropic, NMDA1 (zeta 1)   | 99         | 503  | 5.1  | 147          | 878  | 6.0  | 208          | 1249 | 6.00  |
| 17768                                                                             | Kcnab2::potassium voltage-gated channel, shaker-related | 45         | 144  | 3.2  | 32           | 306  | 9.6  | 104          | 600  | 5.77  |
| 8626                                                                              | Kcnh3::potassium voltage-gated channel, subfamily H     | 59         | 228  | 3.9  | 77           | 484  | 6.3  | 115          | 650  | 5.65  |
| 21646                                                                             | Scn1b::sodium channel, voltage-gated, type I, beta      | 17         | 181  | 10.6 | 9            | 289  | 32.1 | 31           | 442  | 14.26 |
| <b>Cell Signaling molecules</b>                                                   |                                                         |            |      |      |              |      |      |              |      |       |
| 2815                                                                              | Adcy1::adenylate cyclase 1                              | 380        | 2070 | 5.4  | 517          | 2548 | 4.9  | 719          | 3063 | 4.26  |
| 8602                                                                              | Arf3::ADP-ribosylation factor 3                         | 350        | 1128 | 3.2  | 421          | 1767 | 4.2  | 677          | 2633 | 3.89  |
| 21269                                                                             | Calm3::calmodulin 3                                     | 816        | 2532 | 3.1  | 1093         | 4499 | 4.1  | 2465         | 7267 | 2.95  |
| 17549                                                                             | Camk2n1::calcium/calmodulin-dependent protein kinase II | 268        | 1457 | 5.4  | 339          | 1397 | 4.1  | 544          | 3413 | 6.27  |
| 26035                                                                             | Camkv::CaM kinase-like vesicle-associated               | 373        | 1428 | 3.8  | 542          | 2506 | 4.6  | 1036         | 3154 | 3.04  |
| 23374                                                                             | Igf2::insulin-like growth factor 2                      | 61         | 403  | 6.6  | 101          | 625  | 6.2  | 169          | 690  | 4.08  |
| 21485                                                                             | Pld3::phospholipase D family, member 3                  | 135        | 582  | 4.3  | 217          | 1045 | 4.8  | 316          | 1515 | 4.79  |
| 3966                                                                              | Ppp1r1b::protein phosphatase 1, regulatory (inhibitor)  | 82         | 305  | 3.7  | 112          | 456  | 4.1  | 198          | 739  | 3.73  |
| 23033                                                                             | Prkcb1::protein kinase C, beta 1                        | 280        | 1898 | 6.8  | 354          | 2033 | 5.7  | 405          | 3039 | 7.5   |
| 21046                                                                             | Prkcc::protein kinase C, gamma                          | 19         | 282  | 14.8 | 15           | 413  | 27.5 | 48           | 676  | 14.08 |
| 7429                                                                              | Ptk2b:: protein tyrosine kinase 2 (PTK2), beta          | 18         | 290  | 16.1 | 46           | 403  | 8.8  | 55           | 527  | 9.58  |
| 464                                                                               | Ptpn::protein tyrosine phosphatase, receptor type, N    | 29         | 370  | 12.8 | 49           | 649  | 13.2 | 93           | 856  | 9.2   |

For all genes listed in the table, p values are much smaller than 0.0001.

**Supplemental Table 4 (continued). Upregulation and downregulation of genes from E18 to P7.**

| Gene/<br>Cluster                                                                                 | UCSC Known Genes<br>Descriptions                                                    | Single-End |      |       | Paired-End 1 |      |      | Paired-End 2 |      |       |
|--------------------------------------------------------------------------------------------------|-------------------------------------------------------------------------------------|------------|------|-------|--------------|------|------|--------------|------|-------|
|                                                                                                  |                                                                                     | E18        | P7   | Fold  | E18          | P7   | Fold | E18          | P7   | Fold  |
| <b><u>Upregulated transporter genes and some downregulated genes including unknown genes</u></b> |                                                                                     |            |      |       |              |      |      |              |      |       |
| <b><u>Up-regulated</u></b>                                                                       |                                                                                     |            |      |       |              |      |      |              |      |       |
| <b>Transporters</b>                                                                              |                                                                                     |            |      |       |              |      |      |              |      |       |
| 15754                                                                                            | Atp1a1::Na+/K+ -ATPase alpha 1 subunit                                              | 105        | 352  | 3.4   | 112          | 534  | 4.8  | 199          | 976  | 4.90  |
| 1181                                                                                             | Atp1a2::Na+/K+ -ATPase alpha 2 subunit                                              | 176        | 1318 | 7.5   | 247          | 1533 | 6.2  | 286          | 2179 | 7.62  |
| 21415                                                                                            | Atp1a3::Na+/K+ -ATPase alpha 3 subunit                                              | 681        | 3016 | 4.4   | 1027         | 5265 | 5.1  | 1586         | 6941 | 4.38  |
| 1082                                                                                             | Atp1b1::Na+/K+ -ATPase beta 1 subunit                                               | 138        | 1163 | 8.4   | 205          | 1282 | 6.3  | 406          | 3375 | 8.31  |
| 3393                                                                                             | Atp1b2::Na+/K+ -ATPase beta 2 subunit                                               | 135        | 633  | 4.7   | 159          | 1053 | 6.6  | 354          | 1936 | 5.47  |
| 20412                                                                                            | Atp2b2::plasma membrane calcium ATPase 2                                            | 113        | 463  | 4.1   | 171          | 716  | 4.2  | 276          | 1126 | 4.08  |
| 14774                                                                                            | Slc12a5::solute carrier family 12 (potassium-chloride transporter), member 5,KCC2   | 109        | 548  | 5.0   | 166          | 801  | 4.8  | 319          | 1127 | 3.53  |
| 14228                                                                                            | Slc24a3::solute carrier family 24                                                   | 36         | 253  | 7.0   | 65           | 376  | 5.8  | 123          | 547  | 4.45  |
| 478                                                                                              | Slc4a3::solute carrier family 4 (anion exchanger), member 3                         | 107        | 232  | 2.2   | 118          | 511  | 4.3  | 247          | 503  | 2.04  |
| 20413                                                                                            | Slc6a11::solute carrier family 6 (neurotransmitter transporter, GABA), member 11    | 64         | 386  | 6.0   | 101          | 711  | 7.0  | 162          | 734  | 4.53  |
| 15836                                                                                            | Slc6a17::solute carrier family 6 (neurotransmitter transporter), member 17          | 142        | 433  | 3.0   | 158          | 808  | 5.1  | 406          | 1084 | 2.67  |
| 11395                                                                                            | Slc6a7::solute carrier family 6 (neurotransmitter transporter, L-proline), member 7 | 21         | 165  | 7.9   | 61           | 290  | 4.8  | 52           | 392  | 7.54  |
| 21245                                                                                            | Slc8a2::solute carrier family 8 (sodium/calcium exchanger), member 2                | 60         | 339  | 5.7   | 89           | 608  | 6.8  | 112          | 806  | 7.20  |
| 18050                                                                                            | solute carrier family 30 (zinc transporter), member 3                               | 1          | 138  | 138.0 | 10           | 280  | 28.0 | 16           | 493  | 30.81 |
| <b>Unknown Genes</b>                                                                             |                                                                                     |            |      |       |              |      |      |              |      |       |
| 23098                                                                                            | 1500031119Rik::hypothetical protein LOC69017                                        | 105        | 589  | 5.6   | 202          | 1052 | 5.2  | 246          | 1046 | 4.25  |
| 17439                                                                                            | 2300002D11Rik::hypothetical protein LOC69539                                        | 48         | 229  | 4.8   | 75           | 424  | 5.7  | 119          | 618  | 5.19  |
| 8990                                                                                             | 2900046G09Rik::hypothetical protein LOC78408                                        | 71         | 354  | 5.0   | 128          | 768  | 6.0  | 211          | 1071 | 5.08  |
| 11817                                                                                            | Tmem151::hypothetical protein LOC381199                                             | 31         | 274  | 8.8   | 63           | 471  | 7.5  | 103          | 915  | 8.88  |
| <b><u>Down-regulated</u></b>                                                                     |                                                                                     |            |      |       |              |      |      |              |      |       |
| 18453                                                                                            | Ccng2::cyclin G2                                                                    | 330        | 98   | 0.3   | 348          | 81   | 0.2  | 561          | 159  | 0.28  |
| 1658                                                                                             | Cd24a::CD24a antigen                                                                | 1261       | 507  | 0.4   | 791          | 175  | 0.2  | 1485         | 357  | 0.24  |
| 5393                                                                                             | Kif26a::kinesin family member 26A                                                   | 167        | 45   | 0.3   | 283          | 53   | 0.2  | 174          | 23   | 0.13  |
| 6037                                                                                             | Smad5::MAD homolog 5                                                                | 236        | 90   | 0.4   | 364          | 69   | 0.2  | 439          | 186  | 0.42  |
| 4679                                                                                             | Sox11::SRY (sex determining region Y)-box containing gene 11                        | 5850       | 524  | 0.1   | 7331         | 510  | 0.1  | 7819         | 501  | 0.06  |

|                      |                                                                                        |      |     |     |      |     |     |      |     |      |
|----------------------|----------------------------------------------------------------------------------------|------|-----|-----|------|-----|-----|------|-----|------|
| 5724                 | Sox4::SRY (sex determining region Y)-box containing gene 4                             | 2415 | 435 | 0.2 | 4047 | 778 | 0.2 | 2718 | 485 | 0.18 |
| <b>Unknown genes</b> |                                                                                        |      |     |     |      |     |     |      |     |      |
| 6468                 | 4833420G17Rik::hypothetical protein LOC67392                                           | 175  | 78  | 0.4 | 211  | 47  | 0.2 | 297  | 104 | 0.35 |
| 25069                | AK011865::RIKEN full-length enriched library, clone:2610203C20, product:unclassifiable | 767  | 144 | 0.2 | 1100 | 80  | 0.1 | 1283 | 217 | 0.17 |
| 17963                | Klh17::SBBI26 protein                                                                  | 364  | 176 | 0.5 | 256  | 45  | 0.2 | 305  | 190 | 0.62 |
| 3844                 | Mbtd1::hypothetical mbt repeat containing protein                                      | 398  | 116 | 0.3 | 401  | 91  | 0.2 | 364  | 102 | 0.28 |

For all genes listed in the table, p values are much smaller than 0.0001.
