# Supplementary material
Source: PubMed Central journal article supplement (PMC2722358)
Supplement: 0902417106_ST5_PDF.pdf [file 0902417106_ST5_PDF.pdf]

**Supplemental Table 5: Genes with important functions during brain development, including those encoding receptors and channels, transcription factors, apoptosis and disease-related proteins.**

| Cluster                              | UCSC Known Genes Descriptions                                                        | Single-end |      | Paired-end 1 |      | Paired-end 2 |      |
|--------------------------------------|--------------------------------------------------------------------------------------|------------|------|--------------|------|--------------|------|
|                                      |                                                                                      | E18        | P7   | E18          | P7   | E18          | P7   |
| <b><u>Receptors and channels</u></b> |                                                                                      |            |      |              |      |              |      |
| <b>Glutamate Receptors</b>           |                                                                                      |            |      |              |      |              |      |
| 3168                                 | Gria1::glutamate receptor, ionotropic, AMPA1 (alpha 1)                               | 274        | 489  | 535          | 711  | 514          | 970  |
| 15355                                | Gria2::glutamate receptor, ionotropic, AMPA2 (alpha 2)                               | 2016       | 1576 | 2120         | 850  | 2209         | 2152 |
| 26610                                | Gria3::glutamate receptor, ionotropic, AMPA3 (alpha 3)                               | 56         | 120  | 76           | 63   | 117          | 321  |
| 24669                                | Gria4::glutamate receptor, ionotropic, AMPA4 (alpha 4)                               | 97         | 132  | 172          | 152  | 187          | 200  |
| 6898                                 | Grid1::glutamate receptor, ionotropic, delta 1                                       | 11         | 34   | 20           | 35   | 30           | 72   |
| 19987                                | Grid2::glutamate receptor, ionotropic, delta 2                                       | 1          | 7    | 0            | 0    | 2            | 2    |
| 9400                                 | Grik1::glutamate receptor, ionotropic, kainate 1                                     | 58         | 58   | 91           | 54   | 68           | 68   |
| 1672                                 | Grik2::glutamate receptor, ionotropic, kainate 2                                     | 16         | 9    | 10           | 0    | 15           | 13   |
| 17292                                | Grik3::glutamate receptor, ionotropic, kainate 3                                     | 3          | 9    | 0            | 14   | 0            | 0    |
| 25078                                | Grik4::glutamate receptor, ionotropic, kainate 4                                     | 11         | 35   | 24           | 49   | 13           | 38   |
| 21416                                | Grik5::glutamate receptor, ionotropic, kainate 5 (gamma 2)                           | 313        | 452  | 533          | 856  | 721          | 1015 |
| 12723                                | Grin1::glutamate receptor, ionotropic, NMDA1 (zeta 1)                                | 99         | 503  | 147          | 878  | 208          | 1249 |
| 8826                                 | Grin2a::glutamate receptor, ionotropic, NMDA2A (epsilon 1)                           | 0          | 2    | 0            | 12   | 0            | 3    |
| 20928                                | Grin2b::glutamate receptor, ionotropic, NMDA2B (epsilon 2)                           | 209        | 397  | 288          | 511  | 126          | 219  |
| 4351                                 | Grin2c::glutamate receptor, ionotropic, NMDA2C (epsilon 3)                           | 3          | 11   | 1            | 17   | 14           | 48   |
| 21880                                | Grin2d::glutamate receptor, ionotropic, NMDA2D (epsilon 4)                           | 16         | 40   | 23           | 87   | 23           | 36   |
| 2067                                 | Grin3b::glutamate receptor, ionotropic, NMDA3B                                       | 4          | 1    | 4            | 0    | 3            | 2    |
| 8180                                 | Grina::glutamate receptor, ionotropic, NMDA-associated protein 1 (glutamate binding) | 375        | 680  | 699          | 1063 | 792          | 1512 |
| 25725                                | Grin1a::glutamate receptor, ionotropic, NMDA-like 1A                                 | 296        | 363  | 396          | 382  | 674          | 750  |
| 1439                                 | Grm1::glutamate receptor, metabotropic 1                                             | 12         | 18   | 19           | 55   | 9            | 21   |
| 25999                                | Grm2::glutamate receptor, metabotropic 2                                             | 39         | 60   | 45           | 124  | 60           | 121  |
| 17896                                | Grm3::glutamate receptor, metabotropic 3                                             | 21         | 76   | 7            | 70   | 21           | 142  |
| 10159                                | Grm4::glutamate receptor, metabotropic 4                                             | 21         | 38   | 41           | 122  | 51           | 112  |
| 22493                                | Grm5::glutamate receptor, metabotropic 5                                             | 178        | 328  | 120          | 192  | 194          | 382  |
| 20373                                | Grm7::glutamate receptor, metabotropic 7                                             | 29         | 109  | 31           | 91   | 62           | 188  |
| 19587                                | Grm8::glutamate receptor, metabotropic 8                                             | 7          | 26   | 20           | 22   | 13           | 31   |
| <b>GABA Receptors</b>                |                                                                                      |            |      |              |      |              |      |
| 10471                                | Gabbr1::gamma-aminobutyric acid (GABA-B) receptor 1                                  | 505        | 1199 | 757          | 1503 | 1333         | 2471 |
| 16534                                | Gabbr2::gamma-aminobutyric acid (GABA) B receptor 2                                  | 8          | 15   | 1            | 48   | 3            | 11   |
| 2982                                 | Gabra1::gamma-aminobutyric acid (GABA-A) receptor, alpha 1                           | 38         | 153  | 14           | 65   | 66           | 440  |
| 18283                                | Gabra2::gamma-aminobutyric acid (GABA-A) receptor, alpha 2                           | 36         | 33   | 17           | 8    | 12           | 36   |

|       |                                                            |     |     |     |     |     |      |
|-------|------------------------------------------------------------|-----|-----|-----|-----|-----|------|
| 26751 | Gabra3::gamma-aminobutyric acid (GABA-A) receptor, alpha 3 | 5   | 8   | 26  | 0   | 5   | 10   |
| 18285 | Gabra4::gamma-aminobutyric acid (GABA-A) receptor, alpha 4 | 18  | 107 | 22  | 63  | 47  | 222  |
| 21971 | Gabra5::gamma-aminobutyric acid (GABA-A) receptor, alpha 5 | 92  | 317 | 125 | 246 | 183 | 596  |
| 2983  | Gabra6::gamma-aminobutyric acid (GABA-A) receptor, alpha6  | 0   | 1   | 0   | 0   | 0   | 0    |
| 18286 | Gabrb1::gamma-aminobutyric acid (GABA-A) receptor, beta 1  | 58  | 152 | 49  | 147 | 41  | 159  |
| 2984  | Gabrb2::gamma-aminobutyric acid (GABA-A) receptor, beta 2  | 329 | 604 | 344 | 289 | 405 | 1011 |
| 21972 | Gabrb3::gamma-aminobutyric acid (GABA) A receptor, beta 3  | 215 | 487 | 343 | 454 | 585 | 942  |
| 17805 | Gabrd::gamma-aminobutyric acid (GABA-A) receptor, delta    | 6   | 24  | 0   | 59  | 8   | 90   |
| 26749 | Gabre::gamma-aminobutyric acid (GABA-A) receptor, epsilon  | 2   | 0   | 2   | 0   | 0   | 0    |
| 18281 | Gabrg1::gamma-aminobutyric acid (GABA-A) receptor, gamma 1 | 25  | 44  | 22  | 20  | 54  | 116  |
| 2981  | Gabrg2::gamma-aminobutyric acid (GABA-A) receptor, gamma 2 | 136 | 234 | 177 | 156 | 229 | 435  |
| 21970 | Gabrg3::gamma-aminobutyric acid (GABA-A) receptor, gamma 3 | 1   | 2   | 6   | 2   | 0   | 0    |
| 2956  | Gabrp::gamma-aminobutyric acid (GABA-A) receptor, pi       | 1   | 0   | 0   | 0   | 0   | 0    |
| 26752 | Gabrq::gamma-aminobutyric acid (GABA-A) receptor, theta    | 3   | 11  | 0   | 9   | 6   | 15   |
| 16276 | Gabrr1::gamma-aminobutyric acid (GABA) receptor, rho 1     | 1   | 0   | 0   | 0   | 0   | 0    |
| 16275 | Gabrr2::gamma-aminobutyric acid (GABA-C) receptor, rho 2   | 0   | 1   | 0   | 0   | 1   | 0    |
| 9323  | Gabrr3::gamma-aminobutyric acid (GABA) receptor, rho 3     | 1   | 1   | 0   | 0   | 0   | 0    |

---

#### Glycine Receptors

|       |                                         |    |     |     |     |     |     |
|-------|-----------------------------------------|----|-----|-----|-----|-----|-----|
| 3165  | Gla1::glycine receptor, alpha 1 subunit | 0  | 0   | 0   | 0   | 0   | 0   |
| 27272 | Gla2::glycine receptor, alpha 2 subunit | 78 | 89  | 132 | 57  | 172 | 155 |
| 23813 | Gla3::glycine receptor, alpha 3 subunit | 0  | 0   | 0   | 0   | 0   | 0   |
| 27103 | Gla4::glycine receptor, alpha 4 subunit | 0  | 0   | 0   | 0   | 0   | 0   |
| 15356 | GlrB::glycine receptor, beta subunit    | 63 | 254 | 79  | 140 | 138 | 491 |

---

#### Cholinergic Receptors

|       |                                                    |    |     |    |     |    |     |
|-------|----------------------------------------------------|----|-----|----|-----|----|-----|
| 11942 | Chrm1::cholinergic receptor, muscarinic 1, CNS     | 38 | 215 | 57 | 517 | 92 | 567 |
| 19671 | Chrm2::cholinergic receptor, muscarinic 2, cardiac | 2  | 0   | 0  | 0   | 2  | 0   |
| 5486  | Chrm3::cholinergic receptor, muscarinic 3, cardiac | 6  | 9   | 0  | 14  | 0  | 14  |
| 13541 | Chrm4::cholinergic receptor, muscarinic 4          | 2  | 2   | 0  | 12  | 2  | 6   |
| 13888 | Chrm5::cholinergic receptor, muscarinic 5          | 0  | 0   | 0  | 0   | 0  | 1   |
| 13188 | Chrna1::cholinergic receptor, nicotinic, alpha 1   | 0  | 0   | 0  | 0   | 0  | 0   |
| 7428  | Chrna2::cholinergic receptor, nicotinic, alpha 2   | 0  | 3   | 0  | 0   | 0  | 2   |
| 25357 | Chrna3::cholinergic receptor, nicotinic, alpha 3   | 12 | 13  | 4  | 4   | 26 | 20  |
| 14963 | Chrna4::cholinergic receptor, nicotinic, alpha 4   | 17 | 86  | 38 | 133 | 71 | 169 |
| 25356 | Chrna5::cholinergic receptor, nicotinic, alpha 5   | 2  | 0   | 0  | 0   | 0  | 3   |
| 23681 | Chrna6::cholinergic receptor, nicotinic, alpha 6   | 0  | 2   | 0  | 0   | 0  | 2   |
| 21993 | Chrna7::cholinergic receptor, nicotinic, alpha 7   | 0  | 2   | 0  | 0   | 2  | 0   |
| 18256 | Chrna9::cholinergic receptor, nicotinic, alpha 9   | 0  | 0   | 0  | 0   | 0  | 0   |

|       |                                                          |     |    |     |     |     |     |
|-------|----------------------------------------------------------|-----|----|-----|-----|-----|-----|
| 22630 | Chrna10::cholinergic receptor, nicotinic, alpha 10       | 0   | 1  | 0   | 0   | 0   | 1   |
| 3406  | Chrnb1::cholinergic receptor, nicotinic, beta 1          | 3   | 3  | 0   | 0   | 3   | 3   |
| 15500 | Chrnb2::neuronal nicotinic acetylcholine receptor beta 2 | 110 | 91 | 178 | 157 | 209 | 187 |
| 23680 | Chrnb3::cholinergic receptor, nicotinic, beta 3          | 0   | 0  | 0   | 0   | 0   | 0   |
| 25358 | Chrnb4::cholinergic receptor, nicotinic, beta 4          | 1   | 0  | 3   | 0   | 1   | 1   |
| 557   | Chrnd::cholinergic receptor, nicotinic, delta            | 0   | 1  | 0   | 0   | 0   | 0   |
| 3456  | Chrne::cholinergic receptor, nicotinic, epsilon          | 0   | 0  | 1   | 0   | 0   | 0   |
| 558   | Chrng::cholinergic receptor, nicotinic, gamma            | 0   | 3  | 0   | 0   | 0   | 0   |

### Dopamine Receptors

|       |                              |    |    |   |    |    |    |
|-------|------------------------------|----|----|---|----|----|----|
| 5973  | Drd1a::dopamine receptor D1A | 14 | 23 | 2 | 23 | 11 | 56 |
| 25183 | Drd2::dopamine receptor 2    | 2  | 8  | 4 | 8  | 8  | 12 |
| 9198  | Drd3::dopamine receptor 3    | 0  | 0  | 0 | 0  | 0  | 0  |
| 23329 | Drd4::dopamine receptor 4    | 0  | 0  | 5 | 9  | 4  | 2  |
| 18158 | Drd5::dopamine receptor 5    | 1  | 2  | 0 | 0  | 4  | 5  |

### Serotonin Receptors

|       |                                                    |    |    |    |    |    |    |
|-------|----------------------------------------------------|----|----|----|----|----|----|
| 6398  | Htr1a::5-hydroxytryptamine (serotonin) receptor 1A | 6  | 13 | 9  | 20 | 16 | 31 |
| 25808 | Htr1b::5-hydroxytryptamine (serotonin) receptor 1B | 0  | 0  | 0  | 0  | 0  | 0  |
| 17515 | Htr1d::5-hydroxytryptamine (serotonin) receptor 1D | 5  | 0  | 0  | 9  | 4  | 10 |
| 9339  | Htr1f::5-hydroxytryptamine (serotonin) receptor 1F | 4  | 2  | 4  | 0  | 3  | 2  |
| 7510  | Htr2a::5-hydroxytryptamine (serotonin) receptor 2A | 0  | 0  | 0  | 0  | 0  | 0  |
| 539   | Htr2b::5-hydroxytryptamine (serotonin) receptor 2B | 0  | 0  | 0  | 0  | 0  | 0  |
| 27160 | Htr2c::5-hydroxytryptamine (serotonin) receptor 2C | 12 | 63 | 11 | 15 | 12 | 88 |
| 25177 | Htr3a::5-hydroxytryptamine (serotonin) receptor 3A | 9  | 2  | 15 | 1  | 27 | 9  |
| 25178 | Htr3b::5-hydroxytryptamine (serotonin) receptor 3B | 0  | 0  | 0  | 0  | 0  | 0  |
| 11422 | Htr4::5-hydroxytryptamine (serotonin) receptor 4   | 0  | 6  | 0  | 0  | 3  | 2  |
| 18003 | Htr5a::5-hydroxytryptamine (serotonin) receptor 5A | 2  | 23 | 15 | 9  | 21 | 51 |
| 760   | Htr5b::5-hydroxytryptamine (serotonin) receptor 5B | 1  | 6  | 0  | 4  | 4  | 10 |
| 17561 | Htr6::5-hydroxytryptamine (serotonin) receptor 6   | 1  | 5  | 5  | 5  | 4  | 3  |
| 12261 | Htr7::5-hydroxytryptamine (serotonin) receptor 7   | 11 | 24 | 3  | 52 | 12 | 60 |

### Calcium Channels

|       |                                                                         |     |     |     |     |     |     |
|-------|-------------------------------------------------------------------------|-----|-----|-----|-----|-----|-----|
| 24083 | Cacna1a::calcium channel, voltage-dependent, P/Q type, alpha 1A subunit | 90  | 215 | 69  | 349 | 109 | 327 |
| 12696 | Cacna1b::calcium channel, voltage-dependent, N type, alpha 1B subunit   | 47  | 82  | 97  | 112 | 61  | 117 |
| 20468 | Cacna1c::calcium channel, voltage-dependent, L type, alpha 1C subunit   | 9   | 13  | 16  | 8   | 1   | 5   |
| 6814  | Cacna1d::calcium channel, voltage-dependent, L type, alpha 1D subunit   | 90  | 114 | 87  | 151 | 136 | 131 |
| 990   | Cacna1e::calcium channel, voltage-dependent, R type, alpha 1E subunit   | 18  | 28  | 26  | 36  | 16  | 13  |
| 26385 | Cacna1f::calcium channel, voltage-dependent, L type, alpha 1F subunit   | 2   | 0   | 0   | 0   | 1   | 0   |
| 3853  | Cacna1g::calcium channel, voltage-dependent, T type, alpha 1G subunit   | 77  | 205 | 178 | 445 | 189 | 404 |
| 9848  | Cacna1h::calcium channel, voltage-dependent, T type, alpha 1H subunit   | 204 | 149 | 309 | 283 | 477 | 248 |
| 8353  | Cacna1i::calcium channel, voltage-dependent, alpha 1I                   | 20  | 121 | 21  | 189 | 43  | 278 |
| 899   | Cacna1s::calcium channel, voltage-dependent, L type, alpha 1S subunit   | 0   | 1   | 0   | 5   | 0   | 0   |

|                 |                                                                      |     |     |     |     |     |     |
|-----------------|----------------------------------------------------------------------|-----|-----|-----|-----|-----|-----|
| 17920           | Cacna2d1::calcium channel, voltage-dependent, alpha2/delta subunit 1 | 46  | 72  | 34  | 72  | 20  | 69  |
| 26010           | Cacna2d2::calcium channel, voltage-dependent, alpha2/delta subunit 2 | 69  | 42  | 110 | 66  | 97  | 94  |
| 6808            | Cacna2d3::calcium channel, voltage-dependent, alpha2/delta subunit 3 | 51  | 140 | 58  | 145 | 84  | 234 |
| 20470           | Cacna2d4::calcium channel, voltage-dependent, alpha2/delta subunit 4 | 0   | 1   | 0   | 0   | 0   | 6   |
| 3958            | Cacnb1::calcium channel, voltage-dependent, beta 1 subunit           | 20  | 38  | 20  | 90  | 31  | 43  |
| 12641/<br>12642 | Cacnb2::calcium channel, voltage-dependent, beta 2 subunit           | 7   | 8   | 2   | 25  | 7   | 21  |
| 8597            | Cacnb3::calcium channel, voltage-dependent, beta 3 subunit           | 295 | 309 | 508 | 470 | 737 | 655 |
| 13057           | Cacnb4::calcium channel, voltage-dependent, beta 4 subunit           | 103 | 201 | 163 | 138 | 120 | 353 |
| 4271            | Cacng1::voltage-dependent calcium channel gamma 1 subunit            | 3   | 6   | 0   | 0   | 4   | 7   |
| 8244            | Cacng2::calcium channel, voltage-dependent, gamma 2 subunit          | 33  | 66  | 63  | 175 | 90  | 149 |
| 23034           | Cacng3::voltage-dependent calcium channel gamma 3 subunit            | 10  | 29  | 8   | 73  | 15  | 68  |
| 4272            | Cacng4::voltage-dependent calcium channel gamma 4 subunit            | 44  | 52  | 67  | 85  | 37  | 48  |
| 4274            | Cacng5::calcium channel, voltage-dependent, gamma 5 subunit          | 17  | 48  | 16  | 73  | 55  | 109 |
| 21050           | Cacng6::voltage-dependent calcium channel gamma 6 subunit            | 0   | 0   | 0   | 6   | 0   | 0   |
| 21047           | Cacng7::voltage-dependent calcium channel gamma 7 subunit            | 34  | 46  | 32  | 53  | 57  | 58  |
| 21048           | Cacng8::voltage-dependent calcium channel gamma 8 subunit            | 5   | 24  | 16  | 15  | 14  | 31  |

---

### Potassium Channels

|       |                                                                                  |     |     |     |     |     |     |
|-------|----------------------------------------------------------------------------------|-----|-----|-----|-----|-----|-----|
| 20603 | Kcna1::potassium voltage-gated channel, shaker-related subfamily, member 1       | 29  | 74  | 11  | 64  | 31  | 168 |
| 15828 | Kcna2::potassium voltage-gated channel, shaker-related subfamily, member 2       | 5   | 9   | 1   | 14  | 1   | 6   |
| 15825 | Kcna3::potassium voltage-gated channel, shaker-related subfamily, member 3       | 4   | 2   | 12  | 0   | 0   | 0   |
| 13829 | Kcna4::potassium voltage-gated channel, shaker-related subfamily, member 4       | 3   | 32  | 10  | 18  | 15  | 51  |
| 20602 | Kcna5::potassium voltage-gated channel, shaker-related subfamily, member 5       | 4   | 5   | 0   | 16  | 6   | 19  |
| 20604 | Kcna6::potassium voltage-gated channel, shaker-related subfamily, member 6       | 39  | 139 | 71  | 179 | 100 | 223 |
| 21843 | Kcna7::potassium voltage-gated channel, shaker-related subfamily, member 7       | 0   | 0   | 0   | 0   | 0   | 0   |
| 15829 | Kcna10::potassium voltage-gated channel, shaker-related subfamily, member 10     | 0   | 0   | 0   | 0   | 0   | 0   |
| 15303 | Kcnab1::potassium voltage-gated channel, shaker-related subfamily, beta member 1 | 11  | 73  | 15  | 29  | 33  | 154 |
| 17768 | Kcnab2::potassium voltage-gated channel, shaker-related subfamily, beta member 2 | 45  | 144 | 32  | 306 | 104 | 600 |
| 3381  | Kcnab3::potassium voltage-gated channel, shaker-related subfamily, beta member 3 | 6   | 22  | 9   | 20  | 18  | 40  |
| 14799 | Kcnb1::potassium voltage gated channel, Shab-related subfamily, member 1         | 12  | 37  | 27  | 75  | 13  | 82  |
| 49    | Kcnb2::potassium voltage gated channel, Shab-related subfamily, member 2         | 9   | 20  | 7   | 42  | 12  | 15  |
| 21895 | Kcnc1::potassium voltage gated channel, Shaw-related subfamily, member 1         | 102 | 114 | 117 | 159 | 161 | 164 |

|                 |                                                                           |    |     |    |     |     |     |
|-----------------|---------------------------------------------------------------------------|----|-----|----|-----|-----|-----|
| 2469            | Kcnc2::potassium voltage gated channel, Shaw-related subfamily, member 2  | 19 | 48  | 23 | 27  | 30  | 66  |
| 21790           | Kcnc3::potassium voltage gated channel, Shaw-related subfamily, member 3  | 49 | 103 | 93 | 185 | 104 | 194 |
| 15835           | Kcnc4::potassium voltage gated channel, Shaw-related subfamily, member 4  | 13 | 119 | 28 | 231 | 51  | 338 |
| 26396           | Kcnd1::potassium voltage-gated channel, Shal-related family, member 1     | 3  | 7   | 0  | 2   | 0   | 6   |
| 19559           | Kcnd2::potassium voltage-gated channel, Shal-related family, member 2     | 66 | 243 | 78 | 115 | 106 | 326 |
| 15800           | Kcnd3::potassium voltage-gated channel, Shal-related family, member 3     | 83 | 56  | 86 | 65  | 123 | 106 |
| 9462            | Kcne1::potassium voltage-gated channel, Isk-related subfamily, member 1   | 0  | 0   | 0  | 0   | 0   | 0   |
| 9458            | Kcne2::potassium voltage-gated channel, Isk-related subfamily, member 2   | 0  | 5   | 0  | 0   | 3   | 3   |
| 22586           | Kcne3::potassium voltage-gated channel, Isk-related subfamily, member 3   | 0  | 0   | 0  | 7   | 0   | 1   |
| 488             | Kcne4::potassium voltage-gated channel, Isk-related subfamily, member 4   | 0  | 1   | 0  | 5   | 1   | 1   |
| 27143           | Kcne11::potassium voltage-gated channel, Isk-related subfamily, member 11 | 14 | 32  | 15 | 47  | 58  | 83  |
| 4637            | Kcnf1::potassium voltage-gated channel, subfamily F, member 1             | 26 | 165 | 29 | 232 | 65  | 400 |
| 14821           | Kcng1::potassium voltage-gated channel, subfamily G, member 1             | 3  | 17  | 21 | 37  | 3   | 10  |
| 10945           | Kcng3::potassium voltage-gated channel, subfamily G, member 3             | 1  | 0   | 0  | 0   | 0   | 0   |
| 24514           | Kcng4::potassium voltage-gated channel, subfamily G, member 4             | 0  | 1   | 0  | 0   | 0   | 3   |
| 1373            | Kcnh1::potassium voltage-gated channel, subfamily H, member 1             | 5  | 41  | 15 | 45  | 10  | 81  |
| 17965           | Kcnh2::voltage-gated potassium channel, subfamily H, member 2             | 23 | 18  | 60 | 46  | 55  | 45  |
| 8626            | Kcnh3::potassium voltage-gated channel, subfamily H, member 3             | 59 | 228 | 77 | 484 | 115 | 650 |
| 4904            | Kcnh5::potassium voltage-gated channel, subfamily H, member 5             | 1  | 2   | 4  | 0   | 1   | 6   |
| 4234            | Kcnh6::potassium voltage-gated channel, subfamily H member 6              | 2  | 2   | 0  | 0   | 1   | 1   |
| 13103           | Kcnh7::potassium voltage-gated channel, subfamily H, member 7             | 36 | 36  | 43 | 1   | 21  | 30  |
| 10663/<br>10664 | Kcnh8::potassium voltage-gated channel, subfamily H, member 8             | 7  | 4   | 5  | 17  | 7   | 3   |
| 24904           | Kcnj1::potassium inwardly-rectifying channel, subfamily J, member 1       | 1  | 0   | 0  | 0   | 0   | 0   |
| 4312            | Kcnj2::potassium inwardly-rectifying channel, subfamily J, member 2       | 1  | 2   | 0  | 0   | 3   | 3   |
| 13065           | Kcnj3::potassium inwardly-rectifying channel, subfamily J, member 3       | 0  | 3   | 6  | 0   | 1   | 8   |
| 8328            | Kcnj4::potassium inwardly-rectifying channel, subfamily J, member 4       | 10 | 105 | 6  | 220 | 12  | 315 |
| 24903           | Kcnj5::potassium inwardly-rectifying channel, subfamily J, member 5       | 0  | 0   | 9  | 0   | 3   | 2   |
| 9485            | Kcnj6::potassium inwardly-rectifying channel, subfamily J, member 6       | 4  | 6   | 0  | 7   | 3   | 11  |
| 20979           | Kcnj8::potassium inwardly-rectifying channel, subfamily J, member 8       | 18 | 13  | 50 | 0   | 40  | 39  |
| 1182            | Kcnj9::potassium inwardly-rectifying channel, subfamily J, member 9       | 8  | 60  | 20 | 137 | 13  | 216 |

|       |                                                                                                  |     |     |     |     |     |     |
|-------|--------------------------------------------------------------------------------------------------|-----|-----|-----|-----|-----|-----|
| 1183  | Kcnj10::potassium inwardly-rectifying channel, subfamily J, member 10                            | 26  | 112 | 32  | 114 | 50  | 289 |
| 21888 | Kcnj11::potassium inwardly-rectifying channel, subfamily J, member 11                            | 52  | 30  | 50  | 101 | 80  | 76  |
| 3279  | Kcnj12::potassium inwardly-rectifying channel, subfamily J, member 12                            | 10  | 6   | 9   | 5   | 10  | 24  |
| 21877 | Kcnj14::potassium inwardly-rectifying channel, subfamily J, member 14                            | 0   | 0   | 0   | 4   | 0   | 0   |
| 9487  | Kcnj15::potassium inwardly-rectifying channel, subfamily J, member 15                            | 0   | 2   | 0   | 0   | 0   | 0   |
| 4311  | Kcnj16::potassium inwardly-rectifying channel, subfamily J, member 16                            | 1   | 19  | 0   | 11  | 0   | 40  |
| 24635 | Kcnk1::potassium channel, subfamily K, member 1                                                  | 25  | 89  | 28  | 97  | 77  | 230 |
| 1340  | Kcnk2::potassium channel, subfamily K, member 2                                                  | 86  | 131 | 78  | 105 | 111 | 207 |
| 18033 | Kcnk3::potassium channel, subfamily K, member 3                                                  | 25  | 77  | 63  | 148 | 58  | 139 |
| 11906 | Kcnk4::potassium channel, subfamily K, member 4                                                  | 0   | 22  | 1   | 20  | 2   | 31  |
| 6604  | Kcnk5::potassium channel, subfamily K, member 5                                                  | 3   | 3   | 10  | 1   | 4   | 4   |
| 21551 | Kcnk6::potassium inwardly-rectifying channel, subfamily K, member 6                              | 0   | 2   | 0   | 3   | 0   | 9   |
| 11852 | Kcnk7::potassium channel, subfamily K, member 7                                                  | 0   | 2   | 0   | 0   | 1   | 0   |
| 8041  | Kcnk9::potassium channel, subfamily K, member 9                                                  | 2   | 0   | 0   | 0   | 0   | 0   |
| 5211  | Kcnk10::potassium channel, subfamily K, member 10                                                | 12  | 5   | 11  | 34  | 22  | 8   |
| 10984 | Kcnk12::potassium channel, subfamily K, member 12                                                | 0   | 17  | 3   | 29  | 4   | 60  |
| 5239  | Kcnk13::potassium channel, subfamily K, member 13                                                | 1   | 4   | 0   | 9   | 1   | 13  |
| 14716 | Kcnk15::potassium channel, subfamily K, member 15                                                | 0   | 0   | 0   | 0   | 0   | 0   |
| 12530 | Kcnk18::potassium channel, subfamily K, member 18                                                | 0   | 0   | 0   | 0   | 0   | 0   |
| 2959  | Kcnmb1::potassium large conductance calcium-activated channel, subfamily M, beta member 1        | 0   | 0   | 0   | 0   | 1   | 0   |
| 15103 | Kcnmb2::potassium large conductance calcium-activated channel, subfamily M, beta member 2        | 18  | 16  | 18  | 11  | 19  | 14  |
| 2486  | Kcnmb4::potassium large conductance calcium-activated channel, subfamily M, beta member 4        | 42  | 91  | 83  | 194 | 97  | 228 |
| 23934 | Kcnn1::potassium intermediate/small conductance calcium-activated channel, subfamily N, member 1 | 25  | 69  | 20  | 74  | 40  | 91  |
| 11306 | Kcnn2::potassium intermediate/small conductance calcium-activated channel, subfamily N, member 2 | 18  | 43  | 62  | 52  | 65  | 99  |
| 15498 | Kcnn3::potassium intermediate/small conductance calcium-activated channel, subfamily N, member 3 | 3   | 3   | 0   | 2   | 6   | 9   |
| 21389 | Kcnn4::potassium intermediate/small conductance calcium-activated channel, subfamily N, member 4 | 0   | 1   | 0   | 0   | 2   | 0   |
| 23385 | Kcnq1::potassium voltage-gated channel, subfamily Q, member 1                                    | 1   | 2   | 0   | 0   | 1   | 3   |
| 14964 | Kcnq2::potassium voltage-gated channel, subfamily Q, member 2                                    | 175 | 249 | 235 | 308 | 301 | 394 |
| 8025  | Kcnq3::potassium voltage-gated channel, subfamily Q, member 3                                    | 1   | 8   | 7   | 12  | 7   | 16  |
| 17223 | Kcnq4::potassium voltage-gated channel, subfamily Q, member 4                                    | 3   | 7   | 14  | 7   | 1   | 4   |
| 87    | Kcnq5::potassium voltage-gated channel, subfamily Q, member 5                                    | 8   | 5   | 10  | 5   | 2   | 10  |
| 14722 | Kcns1::K+ voltage-gated channel, subfamily S, 1                                                  | 5   | 35  | 7   | 82  | 7   | 64  |
| 7793  | Kcns2::K+ voltage-gated channel, subfamily S, 2                                                  | 3   | 5   | 5   | 6   | 6   | 17  |
| 4613  | Kcns3::potassium voltage-gated channel, delayed-rectifier, subfamily S, member 3                 | 2   | 6   | 0   | 8   | 2   | 14  |
| 934   | Kcnt2::potassium channel, subfamily T, member 2                                                  | 0   | 6   | 0   | 5   | 3   | 10  |
| 23653 | Kcnu1::potassium channel, subfamily U, member 1                                                  | 9   | 8   | 15  | 7   | 16  | 19  |

|                                         |                                                         |     |     |     |     |     |      |
|-----------------------------------------|---------------------------------------------------------|-----|-----|-----|-----|-----|------|
| 7853                                    | Kcnv1::potassium channel, subfamily V, member 1         | 22  | 101 | 19  | 63  | 52  | 171  |
| 12190                                   | Kcnv2::potassium channel, subfamily V, member 2         | 0   | 0   | 0   | 0   | 0   | 0    |
| <b>Sodium Channels</b>                  |                                                         |     |     |     |     |     |      |
| 25055                                   | Scn3b::voltage-gated sodium channel beta-3 subunit      | 277 | 397 | 358 | 445 | 597 | 658  |
| 13116                                   | Scn1a::sodium channel, voltage-gated, type I, alpha     | 43  | 99  | 66  | 19  | 38  | 84   |
| 21646                                   | Scn1b::sodium channel, voltage-gated, type I, beta      | 17  | 181 | 9   | 289 | 31  | 442  |
| 13112                                   | Scn2a1::sodium channel, voltage-gated, type II, alpha 1 | 160 | 600 | 235 | 341 | 184 | 673  |
| 25142                                   | Scn2b::sodium channel, voltage-gated, type II, beta     | 18  | 96  | 30  | 137 | 32  | 266  |
| 13110                                   | Scn3a::sodium channel, voltage-gated, type III, alpha   | 121 | 94  | 136 | 64  | 70  | 66   |
| 4249                                    | Scn4a::sodium channel, voltage-gated, type IV, alpha    | 0   | 1   | 0   | 0   | 0   | 0    |
| 25143                                   | Scn4b::sodium channel, type IV, beta                    | 0   | 12  | 0   | 29  | 0   | 40   |
| 26203                                   | Scn5a::voltage-gated sodium channel type V alpha        | 8   | 12  | 19  | 20  | 13  | 19   |
| 13119                                   | Scn7a::sodium channel, voltage-gated, type VII, alpha   | 0   | 2   | 0   | 0   | 0   | 2    |
| 8670/8671                               | Scn8a::sodium channel, voltage-gated, type VIII, alpha  | 166 | 425 | 243 | 589 | 227 | 674  |
| 13118                                   | Scn9a::sodium channel, voltage-gated, type IX, alpha    | 16  | 18  | 17  | 1   | 17  | 7    |
| 26204                                   | Scn10a::sodium channel, voltage-gated, type X, alpha    | 1   | 0   | 0   | 0   | 3   | 0    |
| 26205                                   | Scn11a::sodium channel, voltage-gated, type XI, alpha   | 1   | 1   | 2   | 0   | 0   | 3    |
| 20594                                   | Scnn1a::sodium channel, nonvoltage-gated, type I, alpha | 0   | 12  | 0   | 20  | 1   | 27   |
| 23023                                   | Scnn1b::sodium channel, nonvoltage-gated 1 beta         | 0   | 0   | 0   | 0   | 1   | 1    |
| 23021                                   | Scnn1g::sodium channel, nonvoltage-gated 1 gamma        | 0   | 0   | 0   | 0   | 0   | 0    |
| <b>Chloride Channels</b>                |                                                         |     |     |     |     |     |      |
| 16082                                   | Al747448::calcium activated chloride channel            | 0   | 0   | 0   | 0   | 0   | 0    |
| 16077                                   | Clca1::chloride channel calcium activated 1             | 0   | 1   | 5   | 2   | 1   | 1    |
| 16079                                   | Clca2::chloride channel calcium activated 2             | 0   | 0   | 0   | 0   | 0   | 0    |
| 16084                                   | Clca3::chloride channel calcium activated 3             | 0   | 0   | 0   | 0   | 0   | 0    |
| 16080                                   | Clca4::chloride channel calcium activated 4             | 0   | 0   | 0   | 0   | 0   | 0    |
| 16085                                   | Clca5::chloride channel calcium activated 5             | 0   | 0   | 0   | 0   | 0   | 0    |
| 16083                                   | Clca6::chloride channel calcium activated 6             | 0   | 0   | 0   | 0   | 0   | 0    |
| 15873                                   | Clcc1::chloride channel CLIC-like 1                     | 28  | 18  | 31  | 15  | 51  | 47   |
| 19782                                   | Clcn1::chloride channel 1                               | 4   | 1   | 0   | 2   | 1   | 2    |
| 8991                                    | Clcn2::chloride channel 2                               | 11  | 20  | 9   | 26  | 19  | 25   |
| 23829                                   | Clcn3::chloride channel 3                               | 242 | 400 | 289 | 324 | 462 | 821  |
| 21164                                   | Clcn4-2::chloride channel 4                             | 509 | 748 | 575 | 872 | 916 | 1286 |
| 26378                                   | Clcn5::chloride channel 5                               | 2   | 0   | 7   | 0   | 1   | 1    |
| 17695                                   | Clcn6::chloride channel 6                               | 16  | 9   | 8   | 11  | 17  | 10   |
| 9834                                    | Clcn7::chloride channel 7                               | 73  | 116 | 141 | 146 | 173 | 200  |
| 17600                                   | Clcnka::chloride channel Ka                             | 0   | 0   | 0   | 0   | 0   | 0    |
| 17602                                   | Clcnkb::chloride channel Kb                             | 0   | 0   | 0   | 0   | 0   | 0    |
| 22543                                   | Clns1a::chloride channel, nucleotide-sensitive, 1A      | 158 | 119 | 173 | 112 | 196 | 178  |
| <b>Potassium/chloride Cotransporter</b> |                                                         |     |     |     |     |     |      |
| 11372                                   | Slc12a2::Nkcc1, sodium/potassium/chloride cotransporter | 76  | 84  | 70  | 70  | 194 | 134  |
| 14774                                   | Slc12a5::KCC2, potassium/chloride cotransporter         | 109 | 548 | 166 | 801 | 319 | 1127 |

| Clust<br>er                                            | UCSC Known Genes Descriptions                                                            | Single |     | Paired 1 |     | Paired 2 |     |
|--------------------------------------------------------|------------------------------------------------------------------------------------------|--------|-----|----------|-----|----------|-----|
|                                                        |                                                                                          | E18    | P7  | E18      | P7  | E18      | P7  |
| <b><u>Genes encoding Wnts, BMPs, and hedgehogs</u></b> |                                                                                          |        |     |          |     |          |     |
| <b>Wnts</b>                                            |                                                                                          |        |     |          |     |          |     |
| 2536                                                   | Wif1::Wnt inhibitory factor 1                                                            | 1      | 1   | 0        | 5   | 2        | 1   |
| 8031                                                   | Wisp1::WNT1 inducible signaling pathway protein 1                                        | 0      | 0   | 0        | 0   | 0        | 6   |
| 14715                                                  | Wisp2::WNT1 inducible signaling pathway protein 2                                        | 0      | 1   | 0        | 0   | 0        | 1   |
| 8606                                                   | Wnt1::wingless-related MMTV integration site 1                                           | 0      | 0   | 0        | 0   | 0        | 0   |
| 19553                                                  | Wnt2::wingless-related MMTV integration site 2                                           | 0      | 8   | 0        | 11  | 2        | 13  |
| 15797                                                  | Wnt2b::wingless-related MMTV integration site 2b                                         | 3      | 2   | 0        | 4   | 2        | 3   |
| 4211                                                   | Wnt3::wingless-related MMTV integration site 3                                           | 4      | 4   | 5        | 15  | 17       | 8   |
| 3233                                                   | Wnt3a::wingless-related MMTV integration site 3A                                         | 2      | 0   | 2        | 0   | 2        | 0   |
| 17527                                                  | Wnt4::wingless-related MMTV integration site 4                                           | 1      | 35  | 7        | 60  | 12       | 76  |
| 6807                                                   | Wnt5a::wingless-related MMTV integration site 5A                                         | 9      | 16  | 19       | 6   | 23       | 26  |
| 20473                                                  | Wnt5b::wingless-related MMTV integration site 5B                                         | 2      | 6   | 8        | 5   | 8        | 7   |
| 444                                                    | Wnt6::wingless-related MMTV integration site 6                                           | 2      | 6   | 0        | 1   | 1        | 2   |
| 20298                                                  | Wnt7a::wingless-related MMTV integration site 7A                                         | 79     | 52  | 125      | 72  | 159      | 93  |
| 8466                                                   | Wnt7b::wingless-related MMTV integration site 7B                                         | 220    | 138 | 432      | 302 | 553      | 310 |
| 11165                                                  | Wnt8a::wingless-related MMTV integration site 8A                                         | 0      | 0   | 0        | 0   | 0        | 0   |
| 12394                                                  | Wnt8b::wingless related MMTV integration site 8b                                         | 6      | 0   | 0        | 0   | 1        | 1   |
| 3234                                                   | Wnt9a::wingless-type MMTV integration site 9A                                            | 3      | 17  | 7        | 23  | 11       | 65  |
| 4210                                                   | Wnt9b::wingless-type MMTV integration site 9B                                            | 0      | 0   | 0        | 0   | 0        | 1   |
| 445                                                    | Wnt10a::wingless-related MMTV integration site 10a                                       | 0      | 2   | 6        | 0   | 1        | 2   |
| 8605                                                   | Wnt10b::wingless-related MMTV integration site 10b                                       | 0      | 0   | 0        | 0   | 0        | 0   |
| 22559                                                  | Wnt11::wingless-related MMTV integration site 11                                         | 0      | 2   | 1        | 0   | 1        | 2   |
| 19564                                                  | Wnt16::wingless-related MMTV integration site 16                                         | 0      | 1   | 0        | 0   | 2        | 1   |
| <b>BMPs</b>                                            |                                                                                          |        |     |          |     |          |     |
| 1022                                                   | 6430517E21Rik::BMP/retinoic acid-inducible neural-specific protein 2                     | 100    | 167 | 161      | 248 | 240      | 418 |
| 20209                                                  | Aak1::AP2 associated kinase 1 isoform 1                                                  | 175    | 331 | 264      | 411 | 399      | 777 |
| 14029                                                  | AK040009::BMP and activin membrane-bound inhibitor, pseudogene ( <i>Xenopus laevis</i> ) | 2      | 2   | 0        | 0   | 4        | 5   |
| 11019                                                  | Bambi::BMP and activin membrane-bound inhibitor                                          | 5      | 10  | 22       | 20  | 21       | 22  |
| 7482                                                   | Bmp1::bone morphogenetic protein 1                                                       | 83     | 47  | 127      | 113 | 164      | 154 |
| 14179                                                  | Bmp2::bone morphogenetic protein 2                                                       | 2      | 14  | 3        | 16  | 11       | 31  |
| 18474                                                  | Bmp2k::BMP2 inducible kinase                                                             | 12     | 20  | 8        | 21  | 22       | 34  |
| 18486                                                  | Bmp3::bone morphogenetic protein 3                                                       | 1      | 3   | 2        | 0   | 0        | 7   |
| 7024                                                   | Bmp4::bone morphogenetic protein 4                                                       | 0      | 15  | 1        | 12  | 0        | 18  |
| 25769                                                  | Bmp5::bone morphogenetic protein 5                                                       | 0      | 1   | 0        | 4   | 0        | 1   |
| 5804                                                   | Bmp6::bone morphogenetic protein 6                                                       | 1      | 5   | 0        | 10  | 4        | 15  |
| 14851                                                  | Bmp7::bone morphogenetic protein 7                                                       | 4      | 9   | 1        | 15  | 6        | 18  |
| 17248                                                  | Bmp8a::bone morphogenetic protein 8a                                                     | 2      | 0   | 0        | 0   | 0        | 0   |
| 17241                                                  | Bmp8b::bone morphogenetic protein 8b                                                     | 0      | 0   | 0        | 1   | 0        | 2   |
| 20217                                                  | Bmp10::bone morphogenetic protein 10 preproprotein                                       | 0      | 0   | 0        | 0   | 0        | 0   |
| 26373                                                  | Bmp15::bone morphogenetic protein 15                                                     | 0      | 1   | 0        | 0   | 0        | 1   |



|                  |                                                      |     |     |     |     |     |     |
|------------------|------------------------------------------------------|-----|-----|-----|-----|-----|-----|
| 24863            | Bmper::BMP-binding endothelial regulator             | 15  | 5   | 38  | 7   | 36  | 24  |
| 6892             | Bmpr1a::bone morphogenetic protein receptor, type 1A | 82  | 65  | 73  | 30  | 142 | 150 |
| 16059            | Bmpr1b::bone morphogenetic protein receptor, type 1B | 15  | 21  | 27  | 19  | 41  | 51  |
| 327              | Bmpr2::bone morphogenetic protein receptor, type II  | 11  | 3   | 8   | 11  | 3   | 9   |
| 10905            | Crim1::cysteine rich transmembrane BMP regulator 1   | 2   | 2   | 0   | 4   | 4   | 1   |
| <b>Hedgehogs</b> |                                                      |     |     |     |     |     |     |
| 8615             | Dhh::desert hedgehog                                 | 0   | 0   | 0   | 0   | 2   | 0   |
| 450              | Ihh::Indian hedgehog                                 | 0   | 0   | 0   | 0   | 0   | 2   |
| 18008            | Shh::sonic hedgehog                                  | 1   | 2   | 1   | 3   | 2   | 6   |
| 1374             | Hhat::hedgehog acyltransferase                       | 3   | 2   | 3   | 2   | 3   | 2   |
| 26237            | Hhatl::hedgehog acyltransferase-like                 | 0   | 2   | 0   | 6   | 2   | 18  |
| 24033            | Hhip::Hedgehog-interacting protein                   | 0   | 1   | 6   | 0   | 1   | 0   |
| 17830            | Dvl1::dishevelled, dsh homolog 1                     | 157 | 212 | 287 | 329 | 492 | 486 |
| 3429             | Dvl2::dishevelled 2, dsh homolog                     | 56  | 34  | 86  | 61  | 144 | 103 |
| 8980             | Dvl3::dishevelled 3, dsh homolog                     | 58  | 30  | 64  | 54  | 72  | 33  |

| Cluster                                                     | UCSC Known Genes Descriptions                                                                                                                                                    | Single |     | Paired1 |      | Paired2 |      |
|-------------------------------------------------------------|----------------------------------------------------------------------------------------------------------------------------------------------------------------------------------|--------|-----|---------|------|---------|------|
|                                                             |                                                                                                                                                                                  | E18    | P7  | E18     | P7   | E18     | P7   |
| <b><u>Deferentially expressed transcription factors</u></b> |                                                                                                                                                                                  |        |     |         |      |         |      |
| 39                                                          | Ncoa2::nuclear receptor coactivator 2 isoform a/b                                                                                                                                | 127    | 113 | 138     | 56   | 154     | 141  |
| 107                                                         | Phf3::PHD finger protein 3                                                                                                                                                       | 157    | 127 | 257     | 98   | 218     | 202  |
| 184                                                         | Npas2::neuronal PAS domain protein 2                                                                                                                                             | 0      | 10  | 0       | 17   | 2       | 19   |
| 206                                                         | Pou3f3::POU domain, class 3, transcription factor 3                                                                                                                              | 403    | 154 | 375     | 112  | 672     | 194  |
| 284                                                         | Satb2::special AT-rich sequence binding protein 2                                                                                                                                | 354    | 192 | 345     | 234  | 630     | 274  |
| 360                                                         | Creb1::cAMP responsive element binding protein 1                                                                                                                                 | 236    | 99  | 192     | 109  | 326     | 153  |
| 611                                                         | Hes6::hairy and enhancer of split 6                                                                                                                                              | 171    | 71  | 298     | 199  | 387     | 107  |
| 870                                                         | Jarid1b::PLU1                                                                                                                                                                    | 238    | 124 | 384     | 216  | 532     | 211  |
| 1114                                                        | Rxrg::retinoid X receptor gamma                                                                                                                                                  | 76     | 60  | 107     | 43   | 126     | 76   |
| 1116                                                        | Pbx1::pre B-cell leukemia transcription factor 1                                                                                                                                 | 1535   | 985 | 2046    | 1101 | 1800    | 1221 |
| 1173                                                        | Nhlh1::nescient helix loop helix 1                                                                                                                                               | 6      | 1   | 25      | 0    | 31      | 3    |
| 1250                                                        | Zfp238::zinc finger protein 238 isoform 1/2                                                                                                                                      | 277    | 231 | 243     | 98   | 296     | 213  |
| 1389                                                        | Plxna2::plexin A2 Plxna2::Plxna2 protein.                                                                                                                                        | 631    | 240 | 612     | 313  | 788     | 345  |
| 1448                                                        | Plagl1::Zinc finger protein ZAC1                                                                                                                                                 | 56     | 37  | 80      | 4    | 58      | 28   |
| 1457                                                        | Hivep2::human immunodeficiency virus type I enhancer                                                                                                                             | 223    | 549 | 310     | 483  | 360     | 721  |
| 1702                                                        | Hsf2::heat shock factor 2                                                                                                                                                        | 66     | 34  | 53      | 12   | 118     | 62   |
| 1806                                                        | Ccar1::Cell division cycle and apoptosis regulator protein 1 (CARP-1).                                                                                                           | 310    | 179 | 349     | 88   | 242     | 172  |
| 2097                                                        | Tcf3::Transcription factor E2-alpha (Immunoglobulin enhancer-binding factor E12/E47) (Transcription factor 3) (TCF-3) (Transcription factor A1). Tcf2a::transcription factor E2a | 97     | 52  | 126     | 77   | 202     | 66   |
| 2101                                                        | Klf16::Kruppel-like factor 16                                                                                                                                                    | 36     | 50  | 50      | 138  | 65      | 149  |
| 2255                                                        | Prdm4::PR domain containing 4                                                                                                                                                    | 95     | 72  | 160     | 70   | 189     | 133  |
| 2333                                                        | Ascl1::achaete-scute complex homolog-like 1                                                                                                                                      | 50     | 18  | 104     | 14   | 89      | 25   |
| 2591                                                        | Stat6::signal transducer and activator of transcription                                                                                                                          | 6      | 21  | 3       | 22   | 8       | 33   |
| 2619                                                        | Stat2::signal transducer and activator of transcription                                                                                                                          | 51     | 47  | 77      | 45   | 135     | 92   |
| 2727                                                        | Patz1::POZ (BTB) and AT hook containing zinc finger 1 mazr::Mus musculus mazr mRNA for transcription factor MAZR, complete cds.                                                  | 55     | 36  | 78      | 37   | 102     | 62   |
| 2857                                                        | Meis1::Homeobox protein Meis1 (Myeloid ecotropic viral integration site 1).                                                                                                      | 37     | 14  | 44      | 9    | 63      | 18   |
| 2874                                                        | Otx1::orthodenticle 1                                                                                                                                                            | 30     | 22  | 33      | 16   | 53      | 30   |

|      |                                                                                                                                                                           |      |      |      |      |      |      |
|------|---------------------------------------------------------------------------------------------------------------------------------------------------------------------------|------|------|------|------|------|------|
| 2897 | Bcl11a::B-cell lymphoma/leukemia 11A (B-cell CLL/lymphoma 11A) (COUP-TF- interacting protein 1) (Ecotropic viral integration site 9 protein) (EVI-9)(Zinc finger protein) | 560  | 284  | 790  | 453  | 870  | 541  |
| 2999 | Ebf1::early B-cell factor 1                                                                                                                                               | 16   | 1    | 31   | 7    | 32   | 6    |
| 3039 | Zfp62::zinc finger protein 62 isoform 1/2                                                                                                                                 | 89   | 43   | 122  | 22   | 119  | 54   |
| 3075 | Zfp354c::zinc finger protein 354C                                                                                                                                         | 200  | 128  | 225  | 83   | 331  | 188  |
| 3079 | Zfp2::zinc finger protein 2                                                                                                                                               | 75   | 35   | 106  | 17   | 121  | 52   |
| 3087 | Zfp354a::zinc finger protein 354A                                                                                                                                         | 15   | 18   | 18   | 1    | 40   | 26   |
| 3238 | BC050078::hypothetical protein LOC237775                                                                                                                                  | 35   | 36   | 72   | 38   | 79   | 45   |
| 3310 | Zfp287::zinc finger protein 287                                                                                                                                           | 49   | 38   | 56   | 37   | 90   | 61   |
| 3384 | Chd3::chromodomain helicase DNA binding protein 3                                                                                                                         | 313  | 326  | 475  | 430  | 314  | 301  |
| 3392 | p53::Mus musculus mRNA for p53, complete cds.  Trp53::transformation related protein 53                                                                                   | 84   | 36   | 94   | 32   | 127  | 41   |
| 3405 | Zbtb4::Zinc finger and BTB domain containing 4                                                                                                                            | 58   | 150  | 100  | 229  | 117  | 263  |
| 3623 | Phf12::PHD finger protein 12                                                                                                                                              | 131  | 93   | 139  | 67   | 263  | 129  |
| 3686 | Zfp207::zinc finger protein 207                                                                                                                                           | 305  | 221  | 400  | 185  | 480  | 346  |
| 3749 | Aatf::apoptosis antagonizing transcription factor                                                                                                                         | 49   | 31   | 63   | 21   | 71   | 37   |
| 3814 | Vezf1::vascular endothelial zinc finger 1                                                                                                                                 | 250  | 100  | 223  | 124  | 409  | 183  |
| 3918 | Nfe2l1::nuclear factor, erythroid derived 2,-like 1                                                                                                                       | 118  | 201  | 157  | 376  | 294  | 602  |
| 3965 | Neurod2::neurogenic differentiation 2                                                                                                                                     | 1030 | 309  | 1471 | 540  | 1672 | 479  |
| 3983 | Thra::Thyroid hormone receptor alpha (C-erbA-alpha) (c-erbA-1).                                                                                                           | 1563 | 2285 | 2963 | 4493 | 4186 | 6030 |
| 3984 | Nr1d1::nuclear receptor subfamily 1, group D, member 1                                                                                                                    | 30   | 94   | 52   | 175  | 98   | 276  |
| 3997 | Smarca1::SWI/SNF related, matrix associated, actin                                                                                                                        | 251  | 107  | 283  | 74   | 350  | 106  |
| 4389 | Unk::zinc finger CCCH type containing 5                                                                                                                                   | 63   | 38   | 137  | 101  | 179  | 93   |
| 4423 | Jmjd6::jumonji domain containing 6  PtDsr::Protein PTDSR (Phosphatidylserine receptor) (Apoptotic cell clearance receptor PtdSerR)                                        | 43   | 34   | 64   | 32   | 69   | 51   |
| 4460 | Cbx2::chromobox homolog 2                                                                                                                                                 | 30   | 5    | 120  | 15   | 151  | 17   |
| 4621 | Mycn::neuroblastoma myc-related oncogene 1                                                                                                                                | 190  | 54   | 191  | 35   | 320  | 110  |
| 4666 | Klf11::Kruppel-like factor 11                                                                                                                                             | 31   | 21   | 60   | 24   | 72   | 38   |
| 4673 | Id2::inhibitor of DNA binding 2                                                                                                                                           | 654  | 436  | 663  | 261  | 859  | 526  |
| 4679 | Sox11::SRY-box 11                                                                                                                                                         | 5850 | 524  | 7331 | 510  | 7819 | 501  |
| 4689 | Myt1l::Myelin transcription factor 1-like protein (MyT1L protein) (Postmitotic neural gene 1 protein) (Zinc finger protein Png-1) (Neural zinc finger factor 1) (NZF-1).  | 732  | 622  | 834  | 513  | 825  | 805  |
| 4759 | Foxg1::forkhead box G1                                                                                                                                                    | 724  | 227  | 814  | 158  | 1338 | 357  |
| 4799 | Insm2::insulinoma-associated 2                                                                                                                                            | 8    | 9    | 13   | 0    | 10   | 1    |
| 4804 | Titf1::thyroid transcription factor 1                                                                                                                                     | 10   | 2    | 22   | 4    | 46   | 6    |
| 4898 | Hif1a::hypoxia inducible factor 1, alpha subunit                                                                                                                          | 161  | 131  | 144  | 84   | 219  | 214  |
| 4994 | Zfp410::zinc finger protein 410  Apa1::Mus musculus another partner for ARF 1 (Apa1) mRNA, complete cds.                                                                  | 54   | 58   | 71   | 28   | 102  | 65   |
| 5023 | Fos::FBJ osteosarcoma oncogene                                                                                                                                            | 3    | 20   | 6    | 24   | 5    | 25   |
| 5024 | Jundm2::Jun dimerization protein 2                                                                                                                                        | 8    | 30   | 0    | 42   | 15   | 47   |
| 5327 | Bcl11b::B-cell leukemia/lymphoma 11B isoform a/b                                                                                                                          | 1048 | 414  | 1325 | 405  | 1299 | 523  |
| 5417 | Mta1::metastasis associated 1                                                                                                                                             | 176  | 119  | 204  | 145  | 305  | 186  |
| 5431 | Zfp386::zinc finger protein 386 (Kruppel-like) isoform.                                                                                                                   | 92   | 45   | 77   | 39   | 94   | 50   |
| 5445 | Sp4::trans-acting transcription factor 4                                                                                                                                  | 151  | 62   | 143  | 23   | 151  | 68   |
| 5509 | Arid4b::retinoblastoma binding protein 1-like 1 isoform                                                                                                                   | 212  | 122  | 225  | 60   | 196  | 177  |
| 5516 | Gli3::GLI-Kruppel family member GLI3                                                                                                                                      | 43   | 27   | 55   | 21   | 71   | 14   |
| 5554 | Zkscan3::zinc finger with KRAB and SCAN domains 3                                                                                                                         | 189  | 79   | 232  | 89   | 195  | 94   |
| 5562 | Zfp192::zinc finger protein 192                                                                                                                                           | 56   | 19   | 72   | 8    | 88   | 48   |
| 5591 | Zfp184::Zinc finger protein 184 (Kruppel-like)                                                                                                                            | 20   | 5    | 35   | 13   | 66   | 16   |
| 5724 | Sox4::SRY-box containing gene 4                                                                                                                                           | 2415 | 435  | 4047 | 778  | 2718 | 485  |
| 5859 | Dek::DEK oncogene (DNA binding)                                                                                                                                           | 122  | 87   | 97   | 35   | 160  | 148  |

|      |                                                                                                                                                  |     |     |     |     |      |      |
|------|--------------------------------------------------------------------------------------------------------------------------------------------------|-----|-----|-----|-----|------|------|
| 5864 | Id4::inhibitor of DNA binding 4                                                                                                                  | 176 | 86  | 163 | 45  | 215  | 97   |
| 5958 | Nfil3::nuclear factor, interleukin 3, regulated                                                                                                  | 91  | 33  | 139 | 52  | 224  | 58   |
| 6000 | Nsd1::nuclear receptor-binding SET-domain protein 1                                                                                              | 268 | 277 | 420 | 360 | 506  | 454  |
| 6003 | Mxd3::Max dimerization protein 3                                                                                                                 | 27  | 13  | 30  | 10  | 57   | 16   |
| 6037 | Smad5::MAD homolog 5                                                                                                                             | 236 | 90  | 364 | 69  | 439  | 186  |
| 6132 | Mterfd1::MTERF domain containing 1                                                                                                               | 63  | 40  | 51  | 10  | 63   | 47   |
| 6150 | Zfp87::zinc finger protein 87                                                                                                                    | 42  | 22  | 63  | 11  | 82   | 52   |
| 6223 | Rhobtb3::Rho-related BTB domain containing 3                                                                                                     | 159 | 66  | 193 | 43  | 236  | 89   |
| 6239 | Nr2f1::nuclear receptor subfamily 2, group F, member 1                                                                                           | 798 | 547 | 968 | 660 | 951  | 649  |
| 6252 | Mef2c::myocyte enhancer factor 2C                                                                                                                | 268 | 882 | 319 | 540 | 154  | 581  |
| 6456 | Isl1::ISL1 transcription factor, LIM/homeodomain                                                                                                 | 90  | 15  | 145 | 7   | 175  | 17   |
| 6550 | Fezf2::Fez family zinc finger 2                                                                                                                  | 103 | 68  | 142 | 94  | 203  | 153  |
| 6632 | Myst4::Histone acetyltransferase MYST4 (EC 2.3.1.48) (EC 2.3.1.-) (MYST protein 4) (MOZ, YBF2/SAS3, SAS2 and TIP60 protein 4) (Querkopf protein) | 122 | 37  | 83  | 24  | 91   | 41   |
| 6640 | Zfp503::zinc finger protein 503                                                                                                                  | 35  | 14  | 73  | 9   | 87   | 31   |
| 6830 | Pbrm1::Hypothetical protein (Fragment)                                                                                                           | 678 | 389 | 732 | 295 | 700  | 356  |
| 7045 | Otx2::orthodenticle homolog 2                                                                                                                    | 8   | 4   | 11  | 0   | 26   | 7    |
| 7122 | Zfp219::zinc finger protein 219                                                                                                                  | 151 | 65  | 321 | 158 | 304  | 157  |
| 7244 | Acin1::apoptotic chromatin condensation inducer 1                                                                                                | 450 | 219 | 561 | 313 | 702  | 393  |
| 7323 | Zmym5::zinc finger, MYM-type 5                                                                                                                   | 87  | 54  | 97  | 18  | 126  | 82   |
| 7325 | Zmym2::zinc finger protein 198                                                                                                                   | 128 | 61  | 185 | 27  | 177  | 88   |
| 7340 | Zdhhc20::DHHC-containing protein 20                                                                                                              | 205 | 147 | 244 | 100 | 195  | 172  |
| 7346 | Rcbtb1::regulator of chromosome condensation (RCC1)                                                                                              | 106 | 43  | 62  | 18  | 92   | 38   |
| 7409 | Hmbox1::homeobox containing 1                                                                                                                    | 89  | 75  | 97  | 70  | 164  | 106  |
| 7469 | Egr3::Egr3 protein.  Egr3::early growth response 3                                                                                               | 21  | 108 | 10  | 113 | 40   | 238  |
| 7486 | Hr::hairless protein                                                                                                                             | 24  | 36  | 26  | 95  | 64   | 131  |
| 7531 | Tsc22d1::TSC22 domain family, member 1 isoform 1/2                                                                                               | 837 | 711 | 949 | 596 | 1471 | 1259 |
| 7606 | Rbm26::RNA binding motif protein 26                                                                                                              | 287 | 194 | 312 | 132 | 305  | 230  |
| 7625 | Sox21::SRY-box 21                                                                                                                                | 37  | 27  | 31  | 16  | 80   | 48   |
| 7638 | Mbnl2::muscleblind-like 2 isoform 1/2                                                                                                            | 51  | 148 | 20  | 66  | 47   | 209  |
| 8028 | Phf20l1::PHD finger protein 20-like 1                                                                                                            | 188 | 96  | 217 | 44  | 131  | 97   |
| 8155 | Zfp41::zinc finger protein 41                                                                                                                    | 84  | 44  | 175 | 67  | 242  | 93   |
| 8167 | Zfp623::zinc finger protein 623                                                                                                                  | 42  | 26  | 69  | 29  | 99   | 68   |
| 8219 | Zfp647::zinc finger protein 647                                                                                                                  | 54  | 27  | 78  | 21  | 97   | 29   |
| 8319 | Sox10:: Mus musculus putative transcription factor (Sox10) mRNA                                                                                  | 10  | 73  | 9   | 154 | 25   | 194  |
| 8376 | Tef::thyrotroph embryonic factor isoform 1/2                                                                                                     | 93  | 238 | 102 | 405 | 218  | 593  |
| 8385 | Xrcc6::X-ray repair complementing defective repair in                                                                                            | 40  | 25  | 46  | 20  | 72   | 53   |
| 8410 | Tcf20::transcription factor 20                                                                                                                   | 37  | 17  | 54  | 29  | 22   | 9    |
| 8455 | Phf21b::PHD finger protein 21B                                                                                                                   | 94  | 9   | 113 | 15  | 154  | 11   |
| 8553 | Dbx2::developing brain homeobox 2                                                                                                                | 0   | 9   | 3   | 18  | 3    | 22   |
| 8660 | Pou6f1::POU domain, class 6, transcription factor 1 (Octamer-binding transcription factor EMB) (Transcription regulatory protein MCP-1)          | 163 | 115 | 268 | 175 | 486  | 300  |
| 8677 | Nr4a1::nuclear receptor subfamily 4, group A, member 1                                                                                           | 15  | 52  | 29  | 80  | 38   | 104  |
| 8717 | Znf740::Zinc finger protein 740                                                                                                                  | 148 | 115 | 301 | 101 | 400  | 178  |
| 8726 | Sp1::trans-acting transcription factor 1                                                                                                         | 76  | 58  | 85  | 44  | 138  | 61   |
| 8766 | Zfp263::zinc finger protein 263                                                                                                                  | 65  | 56  | 86  | 56  | 152  | 66   |
| 8783 | Tcfap4::transcription factor AP4                                                                                                                 | 27  | 4   | 61  | 9   | 34   | 7    |
| 8805 | Rogdi::leucine zipper domain protein                                                                                                             | 66  | 188 | 57  | 239 | 150  | 373  |
| 9113 | Zfp148::zinc finger protein 148                                                                                                                  | 164 | 120 | 174 | 73  | 275  | 204  |
| 9196 | Zbtb20::zinc finger and BTB domain containing 20                                                                                                 | 463 | 242 | 572 | 310 | 355  | 212  |
| 9399 | Bach1::BTB and CNC homology 1                                                                                                                    | 39  | 20  | 34  | 9   | 35   | 13   |
| 9440 | Olig1::oligodendrocyte transcription factor 1                                                                                                    | 93  | 403 | 147 | 769 | 312  | 1052 |
| 9496 | Hmgn1::high mobility group nucleosomal binding domain                                                                                            | 106 | 36  | 9   | 0   | 32   | 9    |

|       |                                                                                                                         |      |      |      |      |      |      |
|-------|-------------------------------------------------------------------------------------------------------------------------|------|------|------|------|------|------|
| 9637  | Phf10::PHD finger protein 10                                                                                            | 51   | 35   | 112  | 35   | 77   | 54   |
| 9703  | Zfp160::zinc finger protein 160                                                                                         | 70   | 34   | 83   | 22   | 99   | 52   |
| 9715  | Zfp760::zinc finger protein 760                                                                                         | 31   | 13   | 45   | 19   | 69   | 24   |
| 9722  | 6330416L07Rik::hypothetical protein LOC319615                                                                           | 31   | 33   | 19   | 5    | 46   | 23   |
| 9724  | 1300003B13Rik::hypothetical protein LOC74149                                                                            | 37   | 21   | 46   | 23   | 42   | 18   |
| 9737  | Zfp40::zinc finger protein 40                                                                                           | 70   | 29   | 82   | 21   | 112  | 55   |
| 9904  | Phf1::PHD finger protein 1  Tctex-3::Mus musculus Tctex-3 mRNA, complete cds.                                           | 38   | 31   | 63   | 31   | 58   | 43   |
| 10239 | Pknox1::Pbx/knotted 1 homeobox                                                                                          | 71   | 34   | 63   | 31   | 145  | 71   |
| 10261 | 9030612M13Rik::hypothetical protein LOC208292                                                                           | 195  | 163  | 256  | 99   | 339  | 199  |
| 10262 | Zfp811::zinc finger protein 811                                                                                         | 77   | 38   | 80   | 35   | 85   | 29   |
| 10263 | 6030490I01Rik::zinc finger protein                                                                                      | 37   | 15   | 35   | 11   | 43   | 10   |
| 10270 | 1700065O13Rik::RIKEN cDNA 1700065O13                                                                                    | 35   | 46   | 69   | 13   | 93   | 59   |
| 10272 | Zfp563::zinc finger protein ZFP413                                                                                      | 54   | 46   | 62   | 34   | 127  | 58   |
| 10280 | Zfp101::zinc finger protein 101                                                                                         | 49   | 17   | 100  | 15   | 58   | 23   |
| 10340 | Pbx2::pre B-cell leukemia transcription factor 2                                                                        | 88   | 58   | 127  | 57   | 176  | 143  |
| 10469 | Zfp57::zinc finger protein 57                                                                                           | 351  | 129  | 639  | 221  | 1214 | 296  |
| 10611 | Tref1::transcriptional regulating factor 1 isoform 1/2                                                                  | 36   | 23   | 53   | 34   | 40   | 26   |
| 10628 | Tcf7::transcription factor EB                                                                                           | 4    | 7    | 1    | 26   | 3    | 29   |
| 10644 | Nfya::nuclear transcription factor-Y alpha                                                                              | 9    | 13   | 30   | 11   | 38   | 10   |
| 11029 | Zeb1::zinc finger E-box binding homeobox 1                                                                              | 117  | 95   | 111  | 75   | 184  | 171  |
| 11074 | Zfp521::zinc finger protein 521 isoform 1                                                                               | 38   | 13   | 44   | 13   | 62   | 42   |
| 11110 | Zfp397::zinc finger protein 397                                                                                         | 95   | 42   | 108  | 7    | 125  | 72   |
| 11113 | Zfp191::zinc finger protein 191                                                                                         | 81   | 71   | 115  | 41   | 139  | 116  |
| 11177 | Jmjd1b::jumonji domain containing 1B                                                                                    | 85   | 60   | 107  | 52   | 199  | 88   |
| 11179 | Egr1::early growth response 1                                                                                           | 12   | 100  | 21   | 137  | 25   | 337  |
| 11269 | Nr3c1::nuclear receptor subfamily 3, group C, member 1                                                                  | 37   | 135  | 17   | 110  | 39   | 243  |
| 11386 | Rbm22::RNA binding motif protein 22                                                                                     | 108  | 74   | 145  | 112  | 250  | 173  |
| 11439 | Onecut2::one cut domain, family member 2                                                                                | 35   | 8    | 33   | 10   | 33   | 5    |
| 11449 | Zfp532::zinc finger protein 532                                                                                         | 116  | 58   | 173  | 75   | 251  | 113  |
| 11637 | Tcf4::transcription factor 4 isoform a/b                                                                                | 2701 | 1865 | 2990 | 1788 | 3719 | 2573 |
| 11649 | Smad4::MAD homolog 4                                                                                                    | 215  | 124  | 248  | 91   | 310  | 179  |
| 11656 | Cxxc1::CXXC finger 1 (PHD domain)                                                                                       | 116  | 85   | 166  | 113  | 222  | 132  |
| 11672 | Smad2::MAD homolog 2                                                                                                    | 76   | 56   | 99   | 61   | 116  | 81   |
| 11678 | Pias2::protein inhibitor of activated STAT 2                                                                            | 56   | 29   | 81   | 14   | 93   | 64   |
| 11694 | Setbp1::SET binding protein 1                                                                                           | 124  | 61   | 137  | 57   | 138  | 83   |
| 11723 | Tshz1::teashirt zinc finger family member 1                                                                             | 186  | 89   | 236  | 93   | 244  | 143  |
| 11823 | Sf3b2::splicing factor 3b, subunit 2                                                                                    | 348  | 310  | 418  | 309  | 733  | 620  |
| 11864 | Gja10::Gja10 protein.  Dpf2::D4, zinc and double PHD fingers family 2                                                   | 87   | 62   | 74   | 28   | 113  | 61   |
| 11923 | Rcor2::REST corepressor 2                                                                                               | 177  | 19   | 293  | 110  | 378  | 74   |
| 11970 | Mta2::metastasis-associated gene family, member 2                                                                       | 186  | 81   | 241  | 130  | 375  | 174  |
| 12077 | Zfp91-cntf::Zfp91-Cntf readthrough protein  Zfp91::zinc finger protein 91                                               | 156  | 192  | 199  | 86   | 300  | 282  |
| 12162 | Klf9::Kruppel-like factor 9                                                                                             | 17   | 356  | 9    | 488  | 33   | 839  |
| 12221 | Uhrf2::E3 ubiquitin-protein ligase UHRF2 (EC 6.3.2.-)  NIRF::NIRF mRNA for Np95-like ring finger protein, complete cds. | 158  | 103  | 276  | 83   | 308  | 118  |
| 12371 | Nkx2-3::NK2 transcription factor related, locus 3                                                                       | 4    | 0    | 10   | 0    | 15   | 0    |
| 12534 | Emx2::empty spiracles homolog 2                                                                                         | 35   | 14   | 42   | 11   | 73   | 35   |
| 12830 | Ttf1::transcription termination factor 1                                                                                | 30   | 18   | 35   | 17   | 39   | 23   |
| 12931 | Zbtb43::zinc finger protein 297B isoform b  Zbtb43::zinc finger protein 297B isoform a                                  | 74   | 57   | 87   | 47   | 149  | 91   |
| 12938 | Pbx3::Pre-B-cell leukemia transcription factor 3 (Homeobox protein PBX3)                                                | 119  | 33   | 101  | 38   | 183  | 49   |
| 12964 | Lhx6::LIM homeobox protein 6 isoform 1/2/3/4                                                                            | 112  | 70   | 145  | 77   | 194  | 91   |
| 13001 | Zbtb26::zinc finger and BTB domain containing 26                                                                        | 15   | 7    | 23   | 6    | 32   | 9    |
| 13010 | Lhx2::LIM homeobox protein 2                                                                                            | 308  | 166  | 361  | 185  | 489  | 296  |
| 13031 | Zeb2::zinc finger homeobox 1b isoform 2                                                                                 | 571  | 261  | 683  | 199  | 862  | 355  |
| 13096 | Tbr1::T-box brain gene 1                                                                                                | 399  | 194  | 490  | 96   | 690  | 358  |
| 13161 | Dlx1::distal-less homeobox 1                                                                                            | 282  | 102  | 476  | 148  | 584  | 144  |

|       |                                                                                                                            |     |     |     |     |      |     |
|-------|----------------------------------------------------------------------------------------------------------------------------|-----|-----|-----|-----|------|-----|
| 13163 | Dlx2::distal-less homeobox 2                                                                                               | 91  | 22  | 118 | 25  | 188  | 39  |
| 13175 | Sp3::Sp3 transcription factor isoform 1/2                                                                                  | 149 | 70  | 107 | 21  | 182  | 116 |
| 13190 | Atf2::activating transcription factor 2 isoform 1/2                                                                        | 162 | 224 | 183 | 129 | 316  | 310 |
| 13236 | Neurod1::neurogenic differentiation 1                                                                                      | 162 | 64  | 161 | 25  | 148  | 62  |
| 13275 | Ssrp1::structure specific recognition protein 1                                                                            | 285 | 198 | 441 | 206 | 507  | 292 |
| 13544 | Creb3l1::cAMP responsive element binding protein 3-like                                                                    | 8   | 32  | 10  | 39  | 6    | 55  |
| 13815 | Pax6::paired box gene 6  Pax6::Mus musculus PAX6 mRNA, partial cds, alternatively spliced                                  | 40  | 12  | 57  | 14  | 61   | 23  |
| 13908 | Mrg1::homeobox protein Meis2  Meis2::Homeobox protein Meis2 (Meis1-related protein 1)                                      | 829 | 301 | 702 | 169 | 1270 | 453 |
| 13968 | Mga::MAX-interacting protein                                                                                               | 182 | 104 | 215 | 77  | 183  | 125 |
| 14236 | Insm1::insulinoma-associated 1                                                                                             | 232 | 16  | 220 | 18  | 371  | 20  |
| 14243 | Nkx2-2::NK2 transcription factor related, locus 2                                                                          | 2   | 14  | 0   | 34  | 3    | 23  |
| 14537 | Sox12::SRY-box containing gene 12                                                                                          | 354 | 212 | 552 | 406 | 877  | 336 |
| 14806 | Zfp313::zinc finger protein 313                                                                                            | 113 | 59  | 252 | 100 | 343  | 190 |
| 14819 | Adnp::activity-dependent neuroprotective protein                                                                           | 341 | 283 | 507 | 158 | 757  | 448 |
| 14822 | Nfatc2::nuclear factor of activated T-cells,                                                                               | 5   | 11  | 5   | 36  | 6    | 49  |
| 14829 | Tshz2::teashirt zinc finger family member 2                                                                                | 38  | 118 | 83  | 161 | 84   | 157 |
| 14850 | Tcfap2c::transcription factor AP-2, gamma                                                                                  | 19  | 1   | 13  | 0   | 22   | 1   |
| 14952 | Dio-1::Mus musculus mRNA for death inducer-obliterator-1 (Dio-1).                                                          | 82  | 74  | 129 | 66  | 165  | 125 |
| 14993 | Myt1::myelin transcription factor 1                                                                                        | 85  | 30  | 93  | 29  | 143  | 31  |
| 14999 | Zfx4::zinc finger homeodomain 4                                                                                            | 72  | 9   | 85  | 18  | 74   | 14  |
| 15003 | 3110050N22Rik::hypothetical protein LOC67306                                                                               | 266 | 251 | 301 | 170 | 512  | 430 |
| 15046 | Bhlhb5::basic helix-loop-helix domain containing, class                                                                    | 450 | 259 | 497 | 212 | 764  | 359 |
| 15090 | Mynn::myoneurin                                                                                                            | 40  | 14  | 45  | 27  | 53   | 30  |
| 15104 | Zmat3::wild-type p53-induced gene 1                                                                                        | 66  | 147 | 78  | 221 | 103  | 277 |
| 15121 | Sox2::sex-determining region Y-box 2                                                                                       | 182 | 89  | 159 | 71  | 329  | 178 |
| 15209 | Elf2::ets family transcription factor ELF2A2                                                                               | 45  | 15  | 94  | 12  | 75   | 24  |
| 15616 | Pogz::pogo transposable element with ZNF domain                                                                            | 74  | 74  | 123 | 80  | 92   | 74  |
| 15622 | Zfp687::zinc finger protein 687                                                                                            | 46  | 38  | 94  | 30  | 62   | 42  |
| 15758 | Nhlh2::nescient helix loop helix 2                                                                                         | 31  | 3   | 47  | 4   | 51   | 10  |
| 15966 | Neurog2::neurogenin 2                                                                                                      | 105 | 0   | 118 | 0   | 169  | 3   |
| 16008 | Ints12::integrator complex subunit 12                                                                                      | 25  | 23  | 39  | 21  | 69   | 35  |
| 16181 | Tox::thymocyte selection-associated HMG box                                                                                | 56  | 34  | 43  | 11  | 57   | 25  |
| 16265 | Bach2::BTB and CNC homology 2                                                                                              | 37  | 12  | 65  | 20  | 22   | 4   |
| 16504 | Zbtb5::zinc finger and BTB domain containing 5                                                                             | 36  | 23  | 91  | 38  | 72   | 51  |
| 16585 | Zfp462::zinc finger protein 462                                                                                            | 501 | 131 | 676 | 149 | 405  | 121 |
| 16720 | Akna::AT-hook transcription factor                                                                                         | 22  | 5   | 39  | 9   | 26   | 12  |
| 16766 | Nfib::Nuclear factor 1 B-type (Nuclear factor 1/B) (CCAAT-box-binding transcription factor) (CTF) (TGGCA-binding protein). | 674 | 242 | 977 | 248 | 839  | 236 |
| 16803 | Klhl9::kelch-like 9                                                                                                        | 304 | 252 | 291 | 175 | 505  | 471 |
| 16944 | Nfia::nuclear factor I/A                                                                                                   | 68  | 43  | 89  | 17  | 101  | 47  |
| 17072 | Dmrta2::doublesex and mab-3 related transcription factor                                                                   | 56  | 10  | 64  | 22  | 67   | 18  |
| 17167 | Jmjd2a::JmJc domain-containing histone demethylation protein 3A (EC 1.14.11.-) (Jumonji domain-containing protein 2A)      | 146 | 79  | 237 | 115 | 291  | 148 |
| 17239 | Myc1::lung carcinoma myc related oncogene 1                                                                                | 118 | 67  | 191 | 65  | 334  | 138 |
| 17448 | Arid1a::AT rich interactive domain 1A                                                                                      | 425 | 239 | 337 | 255 | 383  | 175 |
| 17509 | Id3::inhibitor of DNA binding 3                                                                                            | 26  | 115 | 59  | 151 | 91   | 275 |
| 17605 | Zbtb17::zinc finger and BTB domain containing 17                                                                           | 90  | 48  | 98  | 62  | 167  | 91  |
| 17628 | Prdm2::PR domain containing 2, with ZNF domain                                                                             | 50  | 32  | 110 | 62  | 75   | 33  |
| 17739 | Rere::arginine glutamic acid dipeptide (RE) repeats                                                                        | 110 | 102 | 144 | 62  | 129  | 97  |
| 17787 | Prdm16::transcription factor MEL1                                                                                          | 26  | 22  | 93  | 13  | 61   | 36  |
| 17992 | Mll3::myeloid/lymphoid or mixed-lineage leukemia 3                                                                         | 355 | 179 | 401 | 142 | 312  | 156 |
| 18064 | Zfp512::zinc finger protein 512                                                                                            | 184 | 153 | 255 | 158 | 459  | 233 |
| 18097 | Whsc1::Wolf-Hirschhorn syndrome candidate 1                                                                                | 65  | 19  | 38  | 17  | 82   | 36  |
| 18154 | Znf509::Zinc finger protein 509                                                                                            | 27  | 12  | 34  | 18  | 42   | 22  |

|       |                                                                                          |      |     |      |     |      |     |
|-------|------------------------------------------------------------------------------------------|------|-----|------|-----|------|-----|
| 18343 | Hopx::HOP homeobox                                                                       | 20   | 34  | 5    | 67  | 47   | 97  |
| 18557 | Zfp644::zinc finger motif enhancer binding protein 2                                     | 181  | 151 | 196  | 107 | 224  | 200 |
| 18577 | Mtf2::metal response element binding transcription                                       | 245  | 113 | 204  | 110 | 251  | 157 |
| 18926 | Lhx5::LIM homeobox protein 5                                                             | 4    | 1   | 10   | 0   | 16   | 1   |
| 18968 | Cutl2::cut-like 2                                                                        | 58   | 44  | 106  | 78  | 121  | 83  |
| 19197 | Tsc22d4::TSC22-related inducible leucine zipper 2                                        | 72   | 116 | 115  | 185 | 106  | 313 |
| 19209 | Zkscan1::zinc finger protein 36 isoform 2  Zkscan1::zinc finger protein 36 isoform 1     | 113  | 62  | 195  | 39  | 226  | 121 |
| 19210 | Zscan21::zinc finger proliferation 1                                                     | 136  | 55  | 170  | 64  | 237  | 101 |
| 19211 | Zfp113::zinc finger protein 113                                                          | 45   | 19  | 76   | 4   | 44   | 22  |
| 19225 | Zfp157::zinc finger protein 157                                                          | 117  | 73  | 160  | 61  | 224  | 124 |
| 19227 | Zfp68::zinc finger protein 68 isoform a/b                                                | 136  | 80  | 253  | 30  | 330  | 110 |
| 19228 | A430033K04Rik::hypothetical protein LOC243308                                            | 37   | 23  | 86   | 7   | 65   | 34  |
| 19242 | Uncx4.1::Unc4.1 homeobox                                                                 | 1    | 1   | 8    | 0   | 12   | 2   |
| 19284 | Zfp12::zinc finger protein 12  Zfp12::Zfp12 protein.                                     | 61   | 42  | 89   | 42  | 124  | 73  |
| 19326 | Zfp655::zinc finger protein 655 isoform a/b                                              | 50   | 39  | 95   | 22  | 134  | 78  |
| 19474 | Pds5b::PDS5, regulator of cohesion maintenance, homolog                                  | 120  | 149 | 145  | 84  | 299  | 248 |
| 19512 | Dlx5::distal-less homeobox 5 isoform 1/2                                                 | 29   | 10  | 27   | 0   | 59   | 20  |
| 19529 | Phf14::PHD finger protein 14                                                             | 152  | 75  | 108  | 36  | 149  | 60  |
| 19542 | Foxp2::forkhead box P2                                                                   | 223  | 94  | 296  | 86  | 344  | 166 |
| 19550 | Met::met proto-oncogene                                                                  | 30   | 112 | 35   | 101 | 68   | 173 |
| 19828 | Zfp398::zinc finger protein 398 isoform 1/2                                              | 52   | 28  | 50   | 7   | 33   | 19  |
| 19881 | Nfe2l3::nuclear factor, erythroid derived 2, like 3                                      | 37   | 24  | 55   | 15  | 74   | 27  |
| 19934 | Neurod6::neurogenic differentiation 6                                                    | 1030 | 397 | 999  | 288 | 1526 | 474 |
| 20031 | Jmjd1a::jumonji domain containing 1A isoform 1                                           | 66   | 27  | 127  | 11  | 124  | 49  |
| 20103 | Pole4::DNA polymerase epsilon subunit 4                                                  | 155  | 181 | 170  | 109 | 261  | 245 |
| 20149 | Znf638::Zinc finger protein 638 (Nuclear protein 220) (Zinc-finger matrin-like protein). | 220  | 137 | 238  | 60  | 314  | 216 |
| 20166 | Egr4::early growth response 4                                                            | 0    | 42  | 10   | 93  | 2    | 141 |
| 20369 | Bhlhb2::basic helix-loop-helix domain containing, class                                  | 20   | 53  | 18   | 73  | 47   | 139 |
| 20389 | Brpf1::bromodomain and PHD finger containing, 1                                          | 54   | 44  | 104  | 78  | 138  | 98  |
| 20449 | Zfp422::zinc finger protein 422                                                          | 116  | 65  | 85   | 40  | 136  | 39  |
| 20578 | Acrbp::proacrosin binding protein                                                        | 40   | 12  | 78   | 33  | 75   | 15  |
| 20580 | Chd4::chromodomain helicase DNA binding protein 4                                        | 349  | 224 | 457  | 248 | 518  | 352 |
| 20804 | Foxm1::forkhead box M1                                                                   | 40   | 6   | 69   | 22  | 59   | 19  |
| 20991 | Sox5::SRY (sex determining region Y)-box 5  mSox5L::Mus musculus mSox5L mRNA             | 86   | 54  | 132  | 55  | 69   | 50  |
| 21107 | Zfp579::zinc finger protein 579                                                          | 109  | 54  | 133  | 103 | 239  | 142 |
| 21159 | 5730403M16Rik::hypothetical protein LOC232853                                            | 26   | 31  | 60   | 17  | 73   | 38  |
| 21174 | Zik1::zinc finger protein interacting with K protein                                     | 92   | 38  | 130  | 22  | 160  | 54  |
| 21195 | Zfp606::zinc finger protein 606 isoform 1/2                                              | 68   | 15  | 50   | 5   | 103  | 33  |
| 21202 | Zfp329::zinc finger protein 329                                                          | 133  | 74  | 138  | 29  | 163  | 95  |
| 21203 | Zfp110::zinc finger protein 110                                                          | 36   | 19  | 45   | 15  | 44   | 16  |
| 21209 | Zfp446::Zfp446 protein                                                                   | 15   | 13  | 14   | 1   | 34   | 18  |
| 21212 | Trim28::tripartite motif protein 28                                                      | 574  | 381 | 1000 | 598 | 1293 | 692 |
| 21246 | Mrg2::myeloid ecotropic viral integration site-related                                   | 106  | 71  | 126  | 96  | 203  | 120 |
| 21380 | Zfp235::zinc finger protein 235                                                          | 23   | 20  | 32   | 11  | 41   | 24  |
| 21385 | Zfp61::zinc finger protein 61                                                            | 41   | 22  | 75   | 34  | 85   | 47  |
| 21447 | Hnrpul1::Heterogeneous nuclear ribonucleoprotein U-like protein 1                        | 76   | 59  | 114  | 84  | 96   | 65  |
| 21491 | Zfp60::zinc finger protein 60                                                            | 92   | 43  | 100  | 19  | 225  | 101 |
| 21498 | Zfp780b::zinc finger protein 780B                                                        | 59   | 44  | 32   | 15  | 73   | 32  |
| 21514 | Zfp36::zinc finger protein 36                                                            | 10   | 6   | 18   | 1   | 30   | 12  |
| 21556 | Neud4::neuronal d4 domain family member                                                  | 198  | 134 | 282  | 207 | 372  | 207 |
| 21560 | Zfp84::zinc finger protein 84                                                            | 77   | 34  | 89   | 33  | 137  | 61  |
| 21561 | Zfp30::Zinc finger protein 30 (Zfp-30).                                                  | 39   | 27  | 64   | 19  | 73   | 55  |
| 21566 | Zfp27::zinc finger protein 27                                                            | 32   | 24  | 66   | 22  | 68   | 39  |
| 21571 | Zfp14::zinc finger protein 14                                                            | 20   | 17  | 28   | 8   | 40   | 22  |
| 21574 | Zfp260::zinc finger protein 260                                                          | 129  | 81  | 152  | 43  | 229  | 149 |
| 21669 | Cebpg::CCAAT/enhancer binding protein gamma                                              | 123  | 60  | 201  | 68  | 227  | 109 |

|       |                                                                                                |     |     |     |     |     |     |
|-------|------------------------------------------------------------------------------------------------|-----|-----|-----|-----|-----|-----|
| 21685 | Tshz3::teashirt zinc finger family member 3                                                    | 99  | 83  | 140 | 95  | 177 | 99  |
| 21686 | Zfp536::zinc finger protein 536                                                                | 84  | 56  | 124 | 63  | 113 | 56  |
| 21723 | Zfp715::zinc finger protein 715                                                                | 49  | 22  | 58  | 7   | 58  | 38  |
| 21735 | BC043301::hypothetical protein LOC210104                                                       | 24  | 8   | 57  | 12  | 55  | 18  |
| 21834 | Tead2::TEA domain family member 2                                                              | 88  | 9   | 123 | 40  | 165 | 43  |
| 21868 | Dbp::D site albumin promoter binding protein                                                   | 16  | 40  | 27  | 127 | 49  | 222 |
| 21995 | Klf13::Kruppel-like factor 13                                                                  | 49  | 123 | 57  | 165 | 43  | 145 |
| 22139 | Nr2f2::nuclear receptor subfamily 2, group F, member 2                                         | 293 | 125 | 260 | 119 | 381 | 183 |
| 22403 | Zfp710::zinc finger protein 710                                                                | 79  | 45  | 147 | 78  | 124 | 59  |
| 22423 | Zscan2::zinc finger and SCAN domain containing 2                                               | 28  | 12  | 81  | 22  | 86  | 16  |
| 22910 | Zfp143::zinc finger protein 143                                                                | 27  | 13  | 32  | 11  | 65  | 26  |
| 23114 | Zfp768::zinc finger protein 768                                                                | 50  | 33  | 81  | 53  | 103 | 64  |
| 23117 | E430018J23Rik::hypothetical protein LOC101604                                                  | 6   | 0   | 21  | 4   | 17  | 4   |
| 23131 | Zfp629::zinc finger protein 629                                                                | 61  | 43  | 74  | 53  | 163 | 67  |
| 23142 | Zfp646::zinc finger protein 646                                                                | 25  | 6   | 77  | 21  | 44  | 12  |
| 23330 | Deaf1::deformed epidermal autoregulatory factor 1                                              | 134 | 341 | 219 | 457 | 255 | 616 |
| 23427 | Zfp358::zinc finger protein 358                                                                | 113 | 84  | 191 | 146 | 283 | 161 |
| 23487 | Ing1::inhibitor of growth family, member 1                                                     | 78  | 56  | 119 | 52  | 114 | 66  |
| 23620 | Myst3::MYST histone acetyltransferase (monocytic)                                              | 180 | 112 | 190 | 56  | 289 | 145 |
| 23711 | Thex1::histone mRNA 3' end-specific exonuclease                                                | 53  | 37  | 63  | 32  | 108 | 60  |
| 23871 | D10627::hypothetical protein LOC234358                                                         | 20  | 16  | 29  | 8   | 36  | 22  |
| 23874 | AI449175::Kruppel-like zinc finger protein                                                     | 51  | 20  | 57  | 20  | 100 | 46  |
| 23877 | D330038O06Rik::hypothetical protein LOC330788                                                  | 117 | 56  | 106 | 77  | 184 | 72  |
| 24003 | Hmgb2l1::high mobility group box 2-like 1                                                      | 58  | 47  | 104 | 76  | 127 | 81  |
| 24028 | Smad1::MAD homolog 1                                                                           | 107 | 97  | 154 | 114 | 144 | 113 |
| 24090 | Nfix::nuclear factor I/X isoform 1/2/3                                                         | 509 | 302 | 783 | 673 | 339 | 302 |
| 24140 | Zfp423::zinc finger protein 423                                                                | 27  | 16  | 47  | 23  | 77  | 25  |
| 24152 | Tox3::TOX high mobility group box family member 3                                              | 118 | 38  | 138 | 12  | 174 | 55  |
| 24336 | Ctcf::CCCTC-binding factor                                                                     | 203 | 106 | 264 | 120 | 373 | 233 |
| 24370 | Zfp90::zinc finger protein 90                                                                  | 73  | 40  | 113 | 83  | 150 | 70  |
| 24388 | Nfat5::nuclear factor of activated T-cells 5 isoform a/b  Nfat5::NFATz1.                       | 98  | 65  | 85  | 55  | 163 | 105 |
| 24396 | Zfhx3::AT motif binding factor 1                                                               | 182 | 33  | 201 | 49  | 200 | 36  |
| 24406 | 4930566A11Rik::4930566A11Rik protein (Fragment).  4930566A11Rik::hypothetical protein LOC75871 | 164 | 138 | 238 | 191 | 368 | 246 |
| 24482 | Maf::avian musculoaponeurotic fibrosarcoma (v-maf)                                             | 144 | 117 | 154 | 113 | 160 | 130 |
| 24764 | Zfp75::zinc finger protein 75                                                                  | 71  | 47  | 75  | 24  | 124 | 84  |
| 24782 | Zfp26::zinc finger protein 26                                                                  | 77  | 42  | 105 | 28  | 157 | 74  |
| 24783 | Zfp426::zinc finger protein 426                                                                | 66  | 56  | 89  | 66  | 168 | 99  |
| 24785 | 2210010B09Rik::hypothetical protein LOC244721                                                  | 52  | 39  | 89  | 29  | 76  | 56  |
| 24845 | Zfp653::zinc finger protein Zip67                                                              | 48  | 28  | 81  | 39  | 65  | 45  |
| 24858 | Zfp810::zinc finger protein ZFP                                                                | 33  | 29  | 55  | 6   | 61  | 37  |
| 25131 | Mll1::myeloid/lymphoid or mixed-lineage leukemia 1                                             | 382 | 226 | 492 | 358 | 477 | 213 |
| 25365 | Scaper::S phase cyclin A-associated protein in the ER                                          | 176 | 122 | 165 | 86  | 196 | 178 |
| 25371 | Hmg20a::high mobility group 20A                                                                | 248 | 153 | 350 | 294 | 464 | 294 |
| 25718 | Sltm::modulator of estrogen induced transcription                                              | 253 | 156 | 376 | 206 | 353 | 238 |
| 25728 | Tcf12::transcription factor 12                                                                 | 24  | 13  | 41  | 6   | 29  | 12  |
| 25731 | Suhw4::suppressor of hairy wing homolog 4                                                      | 158 | 83  | 150 | 54  | 166 | 106 |
| 25825 | Ibtk::inhibitor of Bruton's tyrosine kinase                                                    | 99  | 34  | 120 | 43  | 138 | 56  |
| 25870 | Zic1::Zic family member 1                                                                      | 71  | 43  | 85  | 39  | 142 | 44  |
| 25871 | Zic4::zinc finger protein of the cerebellum 4                                                  | 42  | 12  | 88  | 21  | 102 | 28  |
| 25893 | Tfdp2::transcription factor Dp-2                                                               | 18  | 8   | 8   | 0   | 23  | 7   |
| 26151 | Ubp1::upstream binding protein 1 isoform a/b                                                   | 130 | 113 | 243 | 62  | 338 | 176 |
| 26184 | Eomes::eomesodermin homolog                                                                    | 129 | 8   | 165 | 4   | 206 | 4   |
| 26252 | Zfp445::zinc finger protein 445                                                                | 341 | 302 | 459 | 178 | 499 | 304 |
| 26474 | Utx::ubiquitously transcribed tetratricopeptide                                                | 42  | 22  | 39  | 14  | 56  | 38  |
| 26601 | Zbtb33::kaiiso protein                                                                         | 97  | 53  | 107 | 20  | 116 | 69  |
| 26633 | Suhw3::Suppressor of hairy wing homolog 3.   Zfp280c::zinc finger protein 280c                 | 51  | 45  | 76  | 11  | 117 | 56  |
| 26715 | Sox3::SRY-box containing gene 3                                                                | 17  | 2   | 32  | 10  | 40  | 22  |

| 26770                                           | Zfp275::Zinc finger protein 275                                          | 53     | 42   | 45       | 24   | 134      | 82   |
|-------------------------------------------------|--------------------------------------------------------------------------|--------|------|----------|------|----------|------|
| 26807                                           | Plxna3::plexin A3                                                        | 232    | 151  | 383      | 166  | 609      | 221  |
| 26875                                           | Arx::aristaless related homeobox gene                                    | 309    | 107  | 347      | 152  | 403      | 152  |
| 26880                                           | Zfx::zinc finger protein X-linked  Zfx::Zfx protein.                     | 56     | 36   | 123      | 43   | 87       | 64   |
| 27021                                           | Zfp711::zinc finger protein 711                                          | 84     | 60   | 110      | 28   | 121      | 52   |
| 27189                                           | Jarid1c::jumonji, AT rich interactive domain 1C (Rbp2)                   | 58     | 34   | 127      | 48   | 106      | 87   |
| Cluster                                         | MGI annotation                                                           | Single |      | Paired 1 |      | Paired 2 |      |
|                                                 |                                                                          | E18    | P7   | E18      | P7   | E18      | P7   |
| <b>Genes related to autophagy and apoptosis</b> |                                                                          |        |      |          |      |          |      |
| <b>Autophagy genes</b>                          |                                                                          |        |      |          |      |          |      |
| 13540                                           | Ambra1::autophagy/beclin 1 regulator 1                                   | 94     | 67   | 118      | 190  | 190      | 213  |
| 6268                                            | Atg10::autophagy-related 10 (yeast)                                      | 12     | 15   | 4        | 11   | 3        | 20   |
| 11318                                           | Atg12:: autophagy-related 12 (yeast)                                     | 113    | 143  | 126      | 126  | 279      | 273  |
| 567                                             | Atg16l1::autophagy-related 16-like 1 (yeast)                             | 77     | 93   | 155      | 129  | 191      | 200  |
| 22607                                           | Atg16l2::autophagy related 16 like 2 (S. cerevisiae)                     | 12     | 16   | 10       | 14   | 22       | 31   |
| 222                                             | Atg3::autophagy-related 3 (yeast)                                        | 64     | 57   | 82       | 39   | 169      | 108  |
| 27136                                           | Atg4a::autophagy-related 4A (yeast)                                      | 6      | 4    | 0        | 0    | 1        | 0    |
| 678                                             | Atg4b::autophagy-related 4B (yeast)                                      | 91     | 90   | 161      | 138  | 247      | 202  |
| 16957                                           | Atg4c::autophagy-related 4C (yeast)                                      | 38     | 56   | 44       | 8    | 46       | 53   |
| 24813                                           | Atg4d::autophagy-related 4D (yeast)                                      | 26     | 11   | 39       | 13   | 33       | 45   |
| 1665                                            | Atg5::autophagy-related 5 (yeast)                                        | 50     | 52   | 72       | 62   | 119      | 101  |
| 20416                                           | Atg7::autophagy-related 7 (yeast)                                        | 18     | 31   | 44       | 43   | 34       | 60   |
| 457                                             | Atg9a::autophagy-related 9A (yeast)                                      | 98     | 225  | 157      | 303  | 191      | 413  |
| 11888                                           | Atg2a:: ATG2 autophagy related 2 homolog A (S. cerevisiae)               | 41     | 68   | 100      | 145  | 93       | 109  |
| 5320                                            | Atg2b::ATG2 autophagy related 2 homolog B (S. cerevisiae)                | 63     | 102  | 146      | 91   | 131      | 175  |
| 17968                                           | Atg9b::ATG9 autophagy related 9 homolog B (S. cerevisiae)                | 6      | 14   | 6        | 21   | 6        | 25   |
| 4097                                            | Becn1::beclin 1, autophagy related                                       | 78     | 92   | 106      | 154  | 250      | 273  |
| 2342                                            | 1200002N14Rik::human ortholog name: damage-regulated autophagy modulator | 0      | 7    | 4        | 11   | 8        | 4    |
| <b>Apoptosis genes</b>                          |                                                                          |        |      |          |      |          |      |
| 2364                                            | Apaf1::apoptotic protease activating factor 1                            | 48     | 44   | 75       | 75   | 130      | 93   |
| 11908                                           | Bad::Bcl-associated death promoter                                       | 55     | 83   | 95       | 135  | 131      | 168  |
| 21849                                           | Bax::Bcl2-associated X protein                                           | 100    | 144  | 160      | 157  | 273      | 224  |
| 16091                                           | Bcl10::B-cell leukemia/lymphoma 10                                       | 32     | 39   | 43       | 28   | 53       | 48   |
| 2897                                            | Bcl11a::B-cell lymphoma/leukemia 11A                                     | 560    | 284  | 790      | 453  | 870      | 541  |
| 5327                                            | Bcl11b::B-cell leukemia/lymphoma 11B                                     | 1048   | 414  | 1325     | 405  | 1299     | 523  |
| 712                                             | Bcl2::B-cell leukemia/lymphoma 2 isoform 1                               | 86     | 39   | 70       | 49   | 102      | 84   |
| 9033                                            | Bcl6::B-cell leukemia/lymphoma 6                                         | 19     | 30   | 26       | 7    | 40       | 44   |
| 3438                                            | Bcl6b::B-cell CLL/lymphoma 6, member B                                   | 13     | 19   | 39       | 10   | 34       | 56   |
| 19003                                           | Bcl7a::B-cell CLL/lymphoma 7A                                            | 267    | 173  | 432      | 248  | 501      | 328  |
| 19128                                           | Bcl7b::B-cell CLL/lymphoma 7B                                            | 27     | 48   | 62       | 79   | 78       | 92   |
| 23132                                           | Bcl7c::B-cell CLL/lymphoma 7C                                            | 77     | 73   | 65       | 96   | 100      | 80   |
| 15712                                           | Bcl9::B-cell CLL/lymphoma 9                                              | 54     | 40   | 97       | 61   | 83       | 46   |
| 23784                                           | Casp3::caspase 3                                                         | 101    | 67   | 70       | 79   | 138      | 44   |
| 17617                                           | Casp9::caspase 9                                                         | 36     | 46   | 66       | 62   | 84       | 94   |
| 8186                                            | Cyc1::cytochrome c-1                                                     | 194    | 313  | 262      | 436  | 430      | 658  |
| 12601                                           | Cugbp2/Napor-1: apoptosis-related RNA binding protein                    | 3509   | 2327 | 4367     | 2003 | 4850     | 3454 |
| 19009                                           | Diablo::diablo homolog (Drosophila), Smac                                | 104    | 104  | 138      | 179  | 253      | 207  |



| Gene/<br>Cluster                         | UCSC Known Genes Descriptions                                                 | Single-end |      | Paired-end 1 |      | Paired-end 2 |      |
|------------------------------------------|-------------------------------------------------------------------------------|------------|------|--------------|------|--------------|------|
|                                          |                                                                               | E18        | P7   | E18          | P7   | E18          | P7   |
| <b><u>Some disease-related genes</u></b> |                                                                               |            |      |              |      |              |      |
| <b>Disease Related Genes</b>             |                                                                               |            |      |              |      |              |      |
| 22002                                    | Apba2::amyloid beta (A4) precursor protein-binding, family A, member 2        | 307        | 406  | 392          | 545  | 345          | 445  |
| 9383                                     | App::amyloid beta (A4) precursor protein                                      | 696        | 2026 | 832          | 1578 | 1238         | 3947 |
| 26985                                    | Atrx:: alpha thalassemia/mental retardation syndrome X-linked homolog (human) | 691        | 484  | 840          | 305  | 832          | 823  |
| 8465                                     | Atxn10::ataxin 10                                                             | 584        | 800  | 680          | 698  | 1063         | 1315 |
| 19097                                    | Auts2::autism susceptibility candidate 2                                      | 371        | 109  | 389          | 180  | 355          | 126  |
| 14160                                    | Prnp::prion protein                                                           | 285        | 513  | 483          | 477  | 729          | 1466 |
| 17156                                    | Prnpip1::prion protein interacting protein 1                                  | 269        | 471  | 489          | 756  | 709          | 990  |
| 3621                                     | Sez6::seizure related gene 6                                                  | 583        | 529  | 995          | 939  | 1373         | 1084 |
